# Supplementary material
Source: publisher figshare collection journal article supplement (https://gsajournals.figshare.com/ndownloader/files/27643623)
Supplement: Supplementary file 1 [file 27643623]

## Sheet: Sheet1
Supplementary file 6. Genotypic data for ND495 × Largo population of 188 recombinant inbred lines genotyped with wheat Infinium 90K SNP iSelect array and SSR markers.
	Chr	Index on 90K SNP iSelect array	Marker Name	SNP Name	Dist (cM)	NL001	NL002	NL003	NL004	NL005	NL006	NL007	NL008	NL009	NL010	NL011	NL014	NL015	NL016	NL017	NL018	NL019	NL020	NL021	NL024	NL025	NL026	NL027	NL028	NL029	NL030	NL032	NL033	NL034	NL035	NL036	NL037	NL038	NL040	NL041	NL042	NL043	NL044	NL045	NL046	NL047	NL048	NL049	NL050
1	1A	12147	IWB12147	BS00100774_51	0	A	A	B	A	A	B	A	A	A	A	A	B	B	B	B	A	A	A	A	A	A	B	A	B	C	A	A	B	A	A	B	B	B	B	B	B	A	B	A	B	B	A	B	A
2	1A	6234	IWB6234	BS00010488_51	0.3	A	A	B	A	A	B	A	A	A	A	A	B	B	B	B	A	A	A	A	A	A	B	A	B	B	A	A	B	A	A	B	B	B	B	B	B	A	B	A	B	B	A	B	A
3	1A	80188	IWA6644	wsnp_Ku_c1818_3557408	1.4	A	A	B	A	A	B	A	A	A	A	A	B	B	B	B	A	A	A	A	A	A	B	A	B	B	B	A	B	A	A	B	B	B	B	B	B	A	B	A	A	B	A	B	A
4	1A	48747	IWB48747	Kukri_rep_c102231_265	4.3	A	A	B	A	A	B	A	A	A	A	A	B	B	B	B	A	A	A	A	B	A	B	A	B	B	A	A	B	A	A	B	B	B	B	B	B	A	B	A	A	B	A	B	B
5	1A	17894	IWB17894	D_GA8KES402HR8TV_187	5.1	A	A	B	A	A	B	A	A	A	A	A	B	B	B	B	A	A	A	A	B	A	B	A	B	B	A	A	B	A	A	B	B	B	B	B	B	A	B	A	A	B	A	B	B
6	1A	31867	IWB31867	GENE-0411_807	5.7	A	A	B	A	A	B	A	A	A	A	A	B	B	B	B	A	A	A	A	B	A	B	A	B	B	A	A	B	A	A	B	B	B	B	B	B	A	B	A	A	B	A	B	B
7	1A	8796	IWB8796	BS00060058_51	6.8	A	A	B	A	A	B	A	A	A	A	A	B	B	B	B	A	A	A	A	B	A	B	A	B	A	A	A	A	A	A	B	B	B	B	B	B	A	C	A	A	B	A	B	C
8	1A	29039	IWB29039	Excalibur_c82557_201	8	A	A	B	A	A	B	A	C	A	A	A	B	B	B	B	A	A	A	A	B	A	B	A	B	B	A	A	B	A	A	B	B	B	B	B	B	A	B	A	A	B	A	B	B
9	1A	73128	IWB73128	Tdurum_contig68827_118	8.6	A	A	B	A	A	B	A	C	A	A	A	B	B	B	B	A	A	A	A	B	A	B	A	B	B	A	A	B	A	A	B	B	B	B	B	B	A	B	A	A	B	A	B	B
10	1A	23623	IWB23623	Excalibur_c21298_515	14.5	A	A	B	B	A	B	A	C	A	B	A	B	B	B	B	A	A	A	A	B	A	A	B	B	B	A	A	B	A	A	B	B	B	B	B	B	B	B	A	A	B	A	B	B
11	1A	61182	IWB61182	RAC875_c97040_104	14.7	A	A	B	B	A	B	A	C	A	B	A	B	B	B	B	A	A	A	A	B	A	A	B	B	B	A	A	B	A	A	B	B	B	B	B	B	B	B	A	A	B	A	B	B
12	1A	20818	IWB20818	Ex_c4876_1221	16.5	A	A	B	B	A	B	A	C	A	B	A	B	B	B	B	C	A	A	A	B	A	A	B	B	B	A	A	B	B	A	B	B	B	B	B	B	B	B	B	A	B	A	B	B
13	1A	39517	IWB39517	Ku_c4823_673	16.8	A	A	B	B	A	B	B	C	A	B	A	B	B	B	B	B	A	A	A	B	A	A	B	B	B	A	A	B	B	A	B	B	B	B	B	B	B	B	B	A	B	A	B	B
14	1A	73615	IWB73615	Tdurum_contig83113_134	18.4	A	A	B	B	A	A	B	B	A	B	A	B	B	B	B	B	A	A	A	B	A	A	B	B	B	A	A	A	B	A	B	B	B	B	B	B	B	B	B	A	B	B	B	B
15	1A	22004	IWB22004	Excalibur_c11941_612	28.4	A	A	B	B	A	A	B	B	A	B	A	B	B	B	B	B	A	A	A	B	A	A	B	B	A	A	A	A	C	A	B	A	B	B	B	B	B	B	B	A	B	B	B	B
16	1A	76219	IWA1388	wsnp_Ex_c10783_17555091	28.7	A	A	B	B	A	A	B	B	A	B	A	B	B	B	B	B	A	A	A	B	A	A	B	B	A	A	A	A	C	A	B	A	C	B	B	B	B	B	B	A	B	B	B	B
17	1A	54031	IWB54031	RAC875_c14926_589	29.2	A	A	A	B	C	A	B	B	A	B	A	B	B	B	B	B	A	A	A	B	A	A	B	B	A	A	A	A	C	A	B	A	C	B	B	B	B	B	B	A	B	B	B	B
18	1A	72066	IWB72066	Tdurum_contig50355_685	30.7	A	A	A	B	A	A	B	B	A	B	A	B	B	B	B	B	A	A	A	B	A	A	B	B	A	A	A	A	C	A	B	A	C	B	B	B	B	B	B	A	B	B	B	B
19	1A	69751	IWB69751	Tdurum_contig29280_216	31.3	A	B	A	B	A	A	B	B	A	B	A	B	B	B	B	B	B	A	A	B	A	A	B	B	A	A	A	A	C	A	B	A	C	B	B	B	B	B	B	A	B	B	B	B
20	1A	35770	IWB35770	IACX1592	31.8	A	B	A	B	A	A	B	B	A	B	A	B	B	B	B	B	C	A	A	B	A	A	B	B	A	A	A	A	C	A	B	A	C	B	B	B	B	B	B	A	B	B	B	B
21	1A	60704	IWB60704	RAC875_c826_2186	32.1	A	B	A	B	A	A	B	B	A	B	A	B	B	B	B	B	C	A	A	B	A	A	B	B	A	A	A	A	C	A	B	A	C	B	B	B	B	B	B	A	B	B	B	B
22	1A	35066	IWB35066	IAAV5652	32.4	A	B	A	B	A	A	B	B	A	B	A	B	B	B	B	B	C	A	A	B	A	A	B	B	A	A	A	A	C	A	B	A	C	B	B	B	B	B	B	A	B	A	B	B
23	1A	64888	IWB64888	RFL_Contig5090_1510	32.7	A	B	A	B	A	A	B	B	A	B	A	B	B	B	B	B	A	A	A	B	A	A	B	B	A	A	A	A	C	A	B	A	A	B	B	B	B	B	B	A	B	A	B	B
24	1A	30674	IWB30674	Excalibur_rep_c114535_55	33.2	A	B	A	B	A	A	B	B	A	B	A	B	B	B	B	B	C	A	A	B	A	A	B	B	A	A	A	A	C	A	B	A	C	B	B	B	B	B	B	A	B	A	B	B
25	1A	9220	IWB9220	BS00064197_51	33.5	A	B	A	B	A	C	B	B	A	B	A	B	B	B	B	B	C	A	A	B	A	A	B	B	C	A	A	A	C	A	B	A	C	B	B	B	B	B	B	A	C	A	B	B
26	1A	59114	IWB59114	RAC875_c5544_4156	34.1	A	B	A	B	A	A	B	B	A	B	A	B	A	B	B	B	C	A	A	B	A	A	B	B	A	A	A	A	C	A	B	A	C	B	B	B	B	B	B	A	B	A	B	B
27	1A	35115	IWB35115	IAAV5931	35.3	A	B	A	B	A	A	B	B	A	B	A	B	A	B	B	B	C	A	A	B	A	A	B	B	A	A	A	A	C	A	B	A	B	B	B	B	B	B	B	A	B	A	B	B
28	1A	58229	IWB58229	RAC875_c46269_387	35.8	A	B	A	B	A	A	B	B	A	B	A	B	A	B	B	B	C	A	A	B	A	A	B	B	A	A	A	A	C	A	B	A	B	B	B	B	B	B	B	A	B	A	B	B
29	1A	57257	IWB57257	RAC875_c37183_331	36.7	A	B	A	B	A	A	B	B	B	B	A	B	A	B	B	B	C	A	A	B	A	A	B	B	A	A	A	A	C	A	B	A	B	B	B	B	B	B	B	A	B	A	B	B
30	1A	80781	IWA7421	wsnp_Ku_rep_c107796_93118214	37	A	B	A	B	A	A	B	B	B	B	A	B	A	B	B	B	C	A	A	B	A	A	B	B	A	A	A	B	C	A	B	A	B	B	B	B	B	B	B	A	B	A	B	B
31	1A	35435	IWB35435	IAAV814	37.2	A	B	A	B	A	A	B	B	B	B	A	B	A	B	B	B	C	A	A	B	A	A	B	B	A	A	A	B	C	A	B	A	B	B	B	B	A	B	B	A	B	A	B	B
32	1A	45874	IWB45874	Kukri_c48434_88	37.8	A	B	A	B	A	A	B	B	B	B	A	B	A	B	B	B	C	A	A	B	A	A	B	B	A	A	A	B	C	A	B	A	B	B	B	B	A	B	B	A	B	A	B	B
33	1A	31877	IWB31877	GENE-0431_601	38.9	A	B	A	B	A	A	B	B	B	B	A	B	A	B	B	B	C	A	A	B	A	A	B	B	A	A	A	B	C	A	B	A	B	B	B	B	A	B	B	A	B	A	B	B
34	1A	31366	IWB31366	Excalibur_rep_c86757_244	39.5	A	B	A	B	A	A	B	B	B	B	A	B	A	B	B	B	C	A	A	B	A	A	B	B	A	A	A	B	C	A	B	A	B	B	B	B	A	B	B	A	B	A	B	B
35	1A	27889	IWB27889	Excalibur_c59486_172	39.8	A	B	A	B	A	A	B	B	B	B	A	B	A	B	B	B	C	A	A	B	A	A	B	B	A	A	A	B	C	A	B	A	B	B	B	B	A	B	B	A	B	A	B	B
36	1A	48847	IWB48847	Kukri_rep_c103147_745	40.1	A	B	A	B	A	A	B	B	B	B	A	B	A	B	B	B	C	A	A	B	A	A	B	B	A	A	A	B	C	A	B	A	B	B	B	B	A	B	B	A	B	A	B	B
37	1A	75360	IWA42	wsnp_BE403956A_Ta_2_3	40.3	A	B	A	B	A	A	B	B	B	B	A	B	A	B	B	B	C	A	A	B	A	A	B	B	A	A	A	B	C	A	B	A	B	B	B	B	A	B	B	A	B	A	B	B
38	1A	3707	IWB3707	BobWhite_c4942_140	40.6	A	B	A	B	A	A	B	B	B	B	A	B	A	B	B	B	C	A	A	B	A	A	B	B	A	A	A	B	C	A	B	A	B	B	B	B	A	B	B	A	B	A	B	B
39	1A	65579	IWB65579	TA002594-0782	41.2	A	B	A	B	A	A	B	B	B	B	A	B	A	B	B	B	C	A	A	B	A	A	B	A	A	A	A	B	B	A	B	A	B	B	B	B	A	B	B	A	B	A	B	B
40	1A	60037	IWB60037	RAC875_c6664_63	42	A	B	A	B	A	A	B	B	B	B	A	B	A	B	B	B	C	A	A	B	A	A	B	A	A	A	A	B	B	A	B	A	B	B	B	B	A	B	A	A	B	A	B	B
41	1A	7929	IWB7929	BS00033469_51	46.2	A	B	A	B	A	A	B	B	B	B	A	B	A	B	B	B	C	A	A	B	A	A	B	A	B	A	A	B	B	A	B	A	B	B	A	B	A	B	B	A	B	A	B	A
42	1A	57702	IWB57702	RAC875_c41275_131	46.4	A	B	A	B	A	A	B	B	B	B	A	B	A	B	B	B	C	A	A	B	A	A	B	A	B	A	A	B	B	A	B	B	B	B	A	B	A	B	B	A	B	A	B	A
43	1A	30746	IWB30746	Excalibur_rep_c66449_1588	48.1	A	B	A	B	A	A	B	B	B	B	A	B	A	B	B	B	C	A	A	B	A	A	B	A	B	B	A	B	B	A	B	B	B	B	A	B	A	B	B	A	B	A	B	A
44	1A	31863	IWB31863	GENE-0410_71	51.1	A	B	A	B	A	A	B	B	B	B	B	B	A	B	B	B	C	A	A	B	A	A	B	A	B	B	A	B	B	A	B	B	B	B	A	B	A	B	B	A	B	A	B	B
45	1A	19625	IWB19625	Ex_c105443_895	52.2	A	B	A	B	A	A	B	B	B	B	B	B	B	B	B	B	C	A	A	B	A	A	B	A	B	B	A	B	B	A	B	B	B	B	A	B	A	B	B	A	B	A	B	B
46	1A	11883	IWB11883	BS00094553_51	57.7	A	B	A	B	A	A	B	B	B	B	B	B	B	B	A	B	C	A	A	B	B	A	A	A	B	B	A	B	B	A	B	B	B	B	A	B	B	B	B	A	A	A	B	B
47	1A	56355	IWB56355	RAC875_c29540_413	58.3	A	B	A	B	B	A	B	B	B	B	B	B	B	B	A	B	C	A	A	B	B	A	A	A	B	B	A	B	B	A	B	B	B	B	A	B	B	B	B	A	A	A	B	B
48	1A	6974	IWB6974	BS00022220_51	58.8	A	B	A	B	B	A	B	B	B	B	B	B	B	B	A	B	C	A	A	B	B	A	A	A	B	B	A	B	B	A	B	B	B	B	A	B	B	B	B	A	A	A	B	B
49	1A	45961	IWB45961	Kukri_c49170_655	59.4	A	B	A	B	B	A	B	B	B	B	B	B	B	B	A	B	C	A	A	B	B	A	A	A	B	B	A	B	B	A	B	B	B	B	A	B	B	B	B	A	A	A	B	B
50	1A	80253	IWA6729	wsnp_Ku_c23012_32893918	59.7	A	B	A	B	B	A	B	B	B	B	B	B	B	B	A	B	C	A	A	B	B	A	A	A	B	B	A	B	B	A	B	B	B	B	A	B	B	A	B	A	A	A	B	B
51	1A	13265	IWB13265	CAP12_c1979_117	59.9	A	B	A	B	B	A	B	B	B	B	B	B	B	B	A	B	C	A	A	B	B	A	A	A	B	B	A	B	B	A	B	B	B	B	A	B	B	A	B	A	A	A	B	B
52	1A	65551	IWB65551	TA002402-1350	60.2	A	B	A	B	B	A	B	B	B	B	B	B	B	B	A	B	C	A	A	B	B	A	A	A	B	B	A	B	B	A	B	B	B	B	A	B	B	A	B	A	A	A	B	B
53	1A	34600	IWB34600	IAAV2694	62.2	A	B	A	B	B	A	B	B	B	B	B	B	B	B	A	B	C	B	A	B	B	A	A	A	B	B	A	B	B	A	B	B	B	B	A	B	B	A	B	A	A	A	B	B
54	1A	77125	IWA2541	wsnp_Ex_c20495_29571203	63	A	B	A	B	B	A	B	B	B	B	B	B	B	B	A	B	C	B	A	B	B	A	B	A	B	B	A	B	B	A	B	B	B	B	A	B	B	A	B	A	A	A	B	B
55	1A	31945	IWB31945	GENE-0527_92	63.9	A	B	A	B	B	A	B	B	B	B	B	B	B	B	B	B	C	B	A	B	B	A	B	A	B	B	A	B	B	A	B	B	B	B	A	B	B	A	B	A	A	A	B	B
56	1A	75699	IWA530	wsnp_BG263358A_Ta_2_1	64.1	A	B	A	B	B	A	B	B	B	A	B	B	B	B	B	B	C	B	A	B	B	A	B	A	B	B	A	B	B	A	B	B	B	B	A	B	B	A	B	A	A	A	B	B
57	1A	13749	IWB13749	CAP7_c11581_78	65.3	A	B	A	B	B	A	B	B	B	A	B	B	B	B	B	B	C	B	A	C	B	A	B	A	B	B	A	B	B	A	B	B	B	B	A	B	B	A	B	A	A	A	B	B
58	1A	6029	IWB6029	BS00009104_51	67.3	A	B	A	B	B	A	B	B	B	A	B	B	B	B	B	B	C	B	A	C	B	A	B	A	B	B	A	B	B	B	B	B	B	B	A	B	B	A	B	B	A	A	B	B
59	1A	12479	IWB12479	BS00110130_51	68.1	A	B	A	B	B	A	B	B	B	A	B	B	B	B	B	B	C	B	B	C	B	A	B	A	B	B	A	B	B	B	B	B	B	B	A	B	B	C	B	B	A	A	B	B
60	1A	55855	IWB55855	RAC875_c25814_361	68.7	A	B	A	B	B	A	B	B	B	A	B	B	B	B	B	B	C	B	B	C	B	A	B	A	B	B	A	B	B	B	B	B	B	B	A	B	B	A	B	B	A	A	B	B
61	1A	7289	IWB7289	BS00022848_51	68.9	A	B	A	B	B	A	B	B	B	A	B	B	B	B	B	B	C	B	B	C	B	A	B	A	B	B	A	B	B	B	B	B	B	B	A	B	B	A	B	B	A	A	B	B
62	1A	59223	IWB59223	RAC875_c56690_320	69.2	A	B	A	B	B	A	B	B	B	A	B	B	B	B	B	B	C	B	B	C	B	A	B	A	B	B	A	B	B	B	B	B	B	B	A	B	B	A	B	B	A	A	B	B
63	1A	10668	IWB10668	BS00073413_51	69.5	A	B	A	B	B	A	B	B	B	A	B	B	B	B	B	B	C	B	B	C	B	A	B	A	B	B	A	B	B	B	B	B	B	B	A	B	B	A	B	B	A	A	B	B
64	1A	81018	IWA7754	wsnp_Ra_c22110_31550370	69.8	A	B	A	B	B	A	B	B	B	A	B	B	B	B	B	B	C	A	B	C	B	A	B	A	B	B	A	B	B	B	B	B	B	B	A	B	B	A	B	B	A	A	B	B
65	1A	50892	IWB50892	Ra_c110766_321	70.6	A	B	A	B	B	A	B	B	B	A	B	B	B	B	B	B	C	A	B	C	B	A	B	A	B	B	A	B	B	B	B	B	B	B	A	B	B	A	B	B	A	A	B	B
66	1A	3160	IWB3160	BobWhite_c41272_159	70.9	A	B	A	B	B	A	B	B	B	A	B	B	B	B	B	B	C	A	B	C	B	A	B	A	B	B	A	B	B	B	B	B	C	B	A	B	B	A	B	B	A	A	B	B
67	1A	1562	IWB1562	BobWhite_c22134_398	71.4	A	B	A	B	B	A	B	B	B	A	B	B	B	B	B	B	C	A	B	C	B	A	B	A	B	B	A	B	B	B	B	B	A	B	A	B	B	A	B	B	A	A	B	B
68	1A	72959	IWB72959	Tdurum_contig63715_235	72.2	A	B	A	B	B	A	B	B	B	A	A	B	B	B	B	B	C	A	B	C	B	A	B	A	B	B	A	B	B	B	B	B	A	B	A	B	B	A	B	B	A	A	B	B
69	1A	54223	IWB54223	RAC875_c16136_129	72.8	A	B	A	B	B	A	B	B	B	A	A	B	B	B	B	B	C	A	B	C	B	A	B	A	B	A	A	B	B	B	B	B	A	B	A	B	B	A	B	B	A	A	B	B
70	1A	70514	IWB70514	Tdurum_contig34826_234	73.1	A	B	A	B	B	A	B	B	B	A	A	B	B	B	B	B	C	A	B	C	B	A	B	A	B	A	A	B	B	B	B	B	A	B	A	B	B	A	B	B	A	A	B	B
71	1A	75349	IWA24	wsnp_BE403322A_Ta_1_1	73.3	A	B	A	B	B	A	B	B	B	A	A	B	B	B	A	B	C	A	B	C	B	A	B	A	B	A	A	B	B	B	B	B	A	B	A	B	B	A	B	B	A	A	B	B
72	1A	27962	IWB27962	Excalibur_c60388_189	73.6	A	B	A	B	B	A	B	B	B	A	A	B	B	B	A	B	B	A	B	B	B	A	B	A	B	A	A	B	B	B	B	B	A	C	A	B	B	A	B	B	A	A	B	B
73	1A	36607	IWB36607	Jagger_c468_53	76.9	A	B	A	B	B	A	B	B	A	A	A	B	B	B	C	B	B	A	B	B	B	A	B	A	B	B	A	B	B	B	B	B	A	B	A	B	B	A	B	B	B	A	B	A
74	1A	9746	IWB9746	BS00066212_51	78	A	B	A	B	B	A	B	B	A	A	A	B	A	B	C	B	B	A	B	B	B	A	B	A	B	B	A	A	B	B	B	B	A	B	A	B	B	A	B	B	B	A	B	A
75	1A	52033	IWB52033	Ra_c41164_730	78.3	A	B	A	B	B	A	B	B	A	A	A	B	A	B	C	B	B	A	B	B	B	A	B	A	B	B	A	B	B	B	B	B	A	B	A	B	B	A	B	B	B	A	B	A
76	1A	37296	IWB37296	JD_c285_1438	78.9	A	B	A	B	B	A	B	B	A	A	A	B	A	B	C	B	B	A	B	B	B	A	B	A	B	B	A	B	B	B	B	B	A	B	A	B	B	A	B	B	B	A	B	A
77	1A	66930	IWB66930	Tdurum_contig11106_264	80.3	A	B	A	B	B	A	B	B	A	A	A	B	A	B	C	B	B	A	B	B	B	A	B	A	B	B	A	B	B	B	B	B	A	B	A	B	B	A	C	B	B	A	B	A
78	1B	8589	IWB8589	BS00050522_51	0	B	B	A	B	C	A	B	A	B	B	B	A	A	B	A	B	A	A	A	B	B	B	A	A	A	B	A	B	A	A	A	B	A	B	B	B	B	B	B	B	A	B	B	A
79	1B	45437	IWB45437	Kukri_c44369_131	0.3	B	B	A	B	C	A	B	A	B	B	B	A	A	B	A	B	A	A	A	B	B	B	A	A	A	B	A	B	A	B	A	B	A	B	B	B	B	B	B	B	A	B	B	A
80	1B	23711	IWB23711	Excalibur_c21898_1423	0.6	B	B	A	B	B	A	B	A	B	B	B	A	A	B	A	B	A	A	A	B	B	B	A	A	A	B	A	B	A	B	A	B	A	B	B	B	B	B	B	B	A	B	B	A
81	1B	21698	IWB21698	Excalibur_c10657_796	0.8	B	B	A	B	B	A	B	A	B	B	B	A	A	B	A	B	A	A	A	B	B	B	A	A	A	B	A	B	A	B	A	B	A	B	B	B	B	B	B	B	A	B	B	A
82	1B	42054	IWB42054	Kukri_c18951_493	1.1	B	B	A	B	B	A	B	A	B	B	B	A	A	B	A	B	A	A	A	B	B	B	A	A	A	B	A	B	A	A	A	B	A	B	B	B	B	B	B	B	A	B	B	A
83	1B	47800	IWB47800	Kukri_c79308_278	6.8	B	B	A	B	B	A	B	A	B	B	B	A	A	B	A	B	A	A	A	B	B	B	A	A	A	B	A	B	A	A	A	B	A	B	B	B	A	B	B	B	B	B	B	A
84	1B	9761	IWB9761	BS00066271_51	8.8	B	B	A	B	B	A	B	A	B	B	B	A	A	B	A	B	B	A	A	B	B	B	A	B	A	B	A	B	A	A	A	B	A	B	B	B	A	B	B	B	B	B	B	A
85	1B	28576	IWB28576	Excalibur_c71158_117	10.4	B	B	A	B	B	A	B	A	B	B	B	A	A	B	A	B	B	A	A	B	B	B	A	B	A	B	A	C	A	A	A	B	A	B	B	C	A	B	B	B	B	B	B	C
86	1B	5995	IWB5995	BS00005004_51	10.7	B	B	A	B	C	A	B	A	B	B	B	A	A	B	A	B	B	A	A	B	B	B	A	B	A	B	A	B	A	A	A	B	A	B	B	B	A	B	B	B	B	B	B	A
87	1B	57219	IWB57219	RAC875_c3692_2287	11.2	B	B	A	B	B	A	B	A	B	B	B	A	A	B	A	B	B	A	A	B	B	B	A	B	A	B	A	B	A	A	A	B	A	B	B	B	A	B	B	B	B	B	B	A
88	1B	39278	IWB39278	Ku_c36151_460	11.5	B	B	A	B	B	A	B	A	B	B	B	A	A	B	A	B	B	A	A	B	B	B	A	B	A	B	A	C	A	A	A	B	A	B	B	B	A	B	B	B	B	B	B	A
89	1B	72085	IWB72085	Tdurum_contig50555_944	12.1	B	B	A	B	C	B	B	A	B	B	B	A	A	B	A	B	B	A	A	B	B	B	A	B	A	B	A	B	A	A	A	B	A	B	B	B	A	B	B	B	B	B	B	A
90	1B	9349	IWB9349	BS00064698_51	12.4	B	B	A	B	B	B	B	A	B	B	B	A	A	B	A	B	B	A	A	B	B	B	A	B	A	B	A	C	B	A	A	B	A	B	B	B	A	B	B	B	B	B	B	C
91	1B	73358	IWB73358	Tdurum_contig76266_134	12.6	B	B	A	B	B	B	B	A	B	B	B	A	A	B	A	B	B	A	A	B	B	B	A	B	A	B	A	B	A	A	A	B	A	B	B	B	A	B	B	B	B	B	B	A
92	1B	9714	IWB9714	BS00066092_51	14.3	B	A	A	B	A	B	B	A	B	B	B	A	A	B	A	B	B	A	A	B	B	B	A	B	A	B	A	B	A	A	A	B	A	B	B	B	A	B	B	A	B	B	B	A
93	1B	14060	IWB14060	CAP7_c3847_204	15.8	B	A	A	B	C	B	B	A	B	B	C	A	A	B	A	B	B	A	A	B	B	B	A	B	A	B	A	B	A	A	A	B	A	B	B	A	A	B	B	A	B	B	B	A
94	1B	34847	IWB34847	IAAV4194	17.2	B	A	B	B	C	B	B	A	B	B	C	A	A	B	A	B	B	A	A	B	B	B	A	B	A	B	A	B	A	A	A	B	A	B	A	A	A	B	B	A	B	B	B	A
95	1B	78502	IWA4349	wsnp_Ex_c5780_10153638	18.9	B	A	B	B	C	B	B	A	B	B	C	A	A	B	A	B	B	A	A	B	B	B	A	B	A	B	A	B	B	A	A	A	A	B	A	A	A	B	B	A	B	B	B	A
96	1B	22398	IWB22398	Excalibur_c14273_1928	19.8	B	A	B	B	A	B	B	A	B	B	C	A	A	B	A	B	B	A	A	B	B	B	A	B	A	B	A	B	B	A	A	A	A	B	A	A	A	B	B	A	B	B	B	A
97	1B	67670	IWB67670	Tdurum_contig12598_408	20.9	B	A	B	B	C	B	B	A	B	B	C	A	A	B	A	B	B	A	A	B	B	B	A	B	A	B	A	B	B	A	A	A	A	B	A	A	A	B	B	A	B	B	B	A
98	1B	33689	IWB33689	GENE-3956_349	21.4	B	A	B	B	A	B	B	A	B	B	C	A	A	B	A	B	B	A	A	B	B	B	A	B	A	B	A	B	B	A	A	A	A	A	A	A	A	B	B	A	B	B	B	A
99	1B	42309	IWB42309	Kukri_c20401_674	21.7	B	A	B	B	A	B	B	A	B	B	C	A	A	B	A	B	C	A	A	B	B	B	A	C	C	B	A	B	B	A	A	A	A	A	A	C	A	B	B	A	B	B	B	A
100	1B	81545	IWA8557	wsnp_RFL_Contig4080_4587633	22	B	A	B	B	A	B	B	A	B	B	C	A	A	B	A	B	B	A	A	B	B	B	A	B	B	B	A	B	B	A	A	A	A	A	A	A	A	B	B	A	B	B	B	A
101	1B	6522	IWB6522	BS00012068_51	22.6	B	A	B	B	C	B	B	A	B	B	C	A	A	B	A	B	B	A	A	B	B	B	A	B	B	B	A	B	B	A	A	A	A	A	A	A	A	B	B	A	B	B	B	A
102	1B	9645	IWB9645	BS00065844_51	22.8	B	A	B	B	C	B	B	A	B	B	C	A	A	B	A	B	B	A	A	B	B	B	A	B	B	B	A	B	B	A	A	A	A	A	A	B	A	B	B	A	B	B	B	A
103	1B	63352	IWB63352	RAC875_rep_c96733_369	23.1	B	A	B	B	C	B	B	A	B	B	C	A	A	B	A	B	B	A	A	B	B	B	A	A	B	B	A	B	B	A	A	A	A	A	A	B	A	B	B	A	B	B	B	A
104	1B	73942	IWB73942	Tdurum_contig95654_237	23.4	B	A	B	B	A	B	B	A	B	B	C	A	A	B	A	B	B	A	A	B	B	B	A	C	B	B	A	B	B	A	A	A	A	A	A	B	A	B	B	A	B	B	B	A
105	1B	73332	IWB73332	Tdurum_contig75938_1546	23.7	B	A	B	B	A	B	B	A	B	B	C	A	A	B	A	B	B	A	A	B	B	B	A	A	B	B	A	B	B	A	A	A	A	A	A	B	A	B	B	A	B	B	B	A
106	1B	12562	IWB12562	BS00110546_51	23.9	B	A	B	B	C	B	B	A	B	B	C	A	A	B	A	B	B	A	A	B	B	B	A	A	B	B	A	B	B	A	A	A	A	A	A	B	A	B	B	A	B	B	B	A
107	1B	28216	IWB28216	Excalibur_c63563_370	24.2	B	A	B	B	C	B	B	A	B	B	C	A	A	B	A	B	A	A	A	B	B	B	A	A	B	B	A	B	B	A	A	A	A	A	A	B	A	B	B	A	B	B	B	A
108	1B	60559	IWB60559	RAC875_c79370_378	25.3	B	A	B	B	A	B	B	A	B	B	C	A	A	B	A	B	A	A	A	B	B	B	A	A	B	B	A	B	B	A	A	A	A	A	A	B	A	B	B	A	B	B	B	A
109	1B	8598	IWB8598	BS00051105_51	25.9	B	A	B	B	A	B	B	A	B	B	C	A	A	B	A	B	A	A	A	B	B	B	A	A	B	B	C	B	B	A	A	A	A	A	A	B	A	B	B	A	B	B	B	A
110	1B	5791	IWB5791	BS00001364_51	26.2	B	A	B	B	A	B	B	A	B	B	C	A	A	B	A	B	A	A	A	B	B	B	A	A	B	B	A	B	B	A	A	A	A	A	A	B	A	B	B	A	B	B	B	A
111	1B	70181	IWB70181	Tdurum_contig31149_408	26.5	B	A	B	B	C	B	B	A	B	B	C	A	A	B	A	B	A	A	A	B	B	B	A	A	B	B	A	B	B	A	A	A	A	A	A	B	A	B	B	A	B	B	B	A
112	1B	8329	IWB8329	BS00043071_51	26.7	B	A	B	B	C	B	B	A	B	B	C	A	A	B	A	B	A	A	A	B	B	B	A	A	B	B	A	B	B	A	A	A	A	A	A	B	A	B	B	A	B	B	B	A
113	1B	6137	IWB6137	BS00009921_51	27	B	A	B	B	C	B	B	A	B	B	C	A	A	B	A	B	A	A	A	B	B	B	A	A	B	B	A	B	B	A	A	A	A	A	A	B	A	B	B	A	B	B	B	A
114	1B	25023	IWB25023	Excalibur_c30762_713	27.3	B	A	B	B	A	B	B	A	B	B	C	A	A	B	A	B	A	A	A	B	B	B	A	A	B	B	A	B	B	A	A	A	A	A	A	B	A	B	B	A	B	B	B	A
115	1B	48018	IWB48018	Kukri_c84940_106	27.8	B	A	B	B	A	B	B	A	B	B	C	A	A	B	A	B	A	A	A	B	B	B	A	A	B	B	A	B	B	A	A	A	A	A	A	B	B	B	B	A	B	B	B	A
116	1B	34608	IWB34608	IAAV2764	28.1	B	A	B	B	A	B	B	A	B	B	C	A	A	B	A	B	A	A	A	B	B	B	A	A	B	B	A	B	B	A	A	A	A	A	A	B	B	B	B	A	B	B	B	A
117	1B	6409	IWB6409	BS00011465_51	28.4	B	A	B	B	A	B	B	A	B	B	C	A	A	B	A	B	A	A	A	B	B	B	A	A	B	B	A	B	B	A	A	A	A	A	A	B	B	B	B	A	B	B	B	A
118	1B	26257	IWB26257	Excalibur_c4163_176	29.2	B	A	B	B	C	B	B	A	B	B	C	A	A	B	A	B	A	A	A	B	B	B	A	A	B	B	A	B	B	A	A	A	A	A	A	B	B	B	B	A	B	B	B	A
119	1B	69550	IWB69550	Tdurum_contig28530_380	29.8	B	A	B	B	C	B	B	A	B	B	C	A	A	B	A	B	A	A	A	B	B	B	A	A	B	B	A	B	B	A	A	A	A	A	A	B	B	B	B	A	B	B	B	A
120	1B	6921	IWB6921	BS00022133_51	30.3	B	A	B	B	C	B	B	A	B	B	C	A	A	B	A	B	A	A	A	B	B	B	A	A	B	B	A	B	B	A	A	A	A	A	A	B	B	B	B	A	B	B	B	A
121	1B	80473	IWA7017	wsnp_Ku_c39862_48205590	32.6	B	A	B	B	A	B	B	A	B	B	C	A	A	B	A	B	A	A	A	B	B	B	B	A	B	B	A	B	B	A	A	A	A	A	A	B	B	B	B	A	B	B	B	A
122	1B	69973	IWB69973	Tdurum_contig30195_318	32.9	B	A	B	B	C	B	B	A	B	B	C	A	A	B	A	B	A	A	A	B	B	B	B	A	B	B	A	B	B	A	A	A	A	A	A	B	B	B	B	A	B	B	B	A
123	1B	72078	IWB72078	Tdurum_contig50473_889	35.2	B	A	B	B	A	B	B	A	B	B	C	A	A	B	A	B	A	A	A	B	B	B	B	A	B	B	A	B	B	A	A	A	A	B	B	B	B	B	B	A	B	B	B	A
124	1B	46559	IWB46559	Kukri_c559_193	35.4	B	A	B	B	A	B	B	A	B	B	C	A	A	B	A	B	A	A	A	B	B	B	B	A	B	B	A	B	B	B	A	A	A	B	B	B	B	B	B	A	B	B	B	A
125	1B	52956	IWB52956	RAC875_c102223_220	36	B	A	B	B	C	B	B	A	B	B	C	A	A	B	A	B	A	A	A	B	B	B	B	A	B	B	A	B	B	B	A	A	A	B	B	B	B	B	B	A	B	B	B	A
126	1B	9693	IWB9693	BS00066007_51	36.3	B	A	B	B	C	B	B	A	B	B	C	A	A	B	A	B	A	A	A	B	B	B	B	A	B	B	A	B	B	B	A	A	A	B	B	B	B	B	B	A	B	B	B	A
127	1B	75880	IWA775	wsnp_CAP11_c543_375403	36.5	B	A	B	B	C	B	B	A	B	B	C	A	A	B	A	B	A	A	A	B	B	B	B	A	B	B	A	B	B	B	A	A	A	B	B	B	B	B	B	A	B	B	B	A
128	1B	11968	IWB11968	BS00096719_51	38.5	B	A	B	B	C	A	B	A	B	B	C	A	A	B	A	B	A	B	A	B	B	B	B	A	B	B	B	B	B	B	A	A	A	B	B	B	B	B	B	A	B	B	B	A
129	1B	61131	IWB61131	RAC875_c95548_156	38.8	B	A	B	B	C	A	B	A	B	B	C	A	A	B	A	B	A	B	A	B	B	B	B	A	B	B	B	B	B	B	A	A	A	B	B	B	B	B	B	A	B	B	B	A
130	1B	5184	IWB5184	BobWhite_rep_c57575_65	39.1	B	A	B	B	C	A	B	A	B	B	C	A	A	B	A	B	A	B	A	B	B	B	B	A	B	B	B	B	B	B	A	A	A	B	B	B	B	B	B	A	B	B	B	A
131	1B	9175	IWB9175	BS00064032_51	39.4	B	A	B	B	A	A	B	A	B	B	C	A	A	B	A	B	A	B	A	B	B	B	B	A	B	B	B	B	B	B	A	A	A	B	B	B	B	B	B	A	B	B	B	A
132	1B	59152	IWB59152	RAC875_c55891_659	40.7	B	A	B	B	A	A	B	A	B	B	C	A	A	B	A	B	A	B	A	B	B	B	B	A	B	B	B	B	B	B	A	A	A	B	B	B	B	B	B	A	B	B	B	A
133	1B	8187	IWB8187	BS00039740_51	41	B	A	B	B	A	A	B	A	B	B	C	A	A	B	A	B	A	B	A	C	B	B	B	A	B	B	B	B	B	B	A	A	A	B	B	B	B	B	B	A	B	B	B	A
134	1B	70038	IWB70038	Tdurum_contig30517_310	42.1	B	A	B	B	A	A	B	A	B	B	A	A	A	B	A	B	A	B	A	B	B	B	B	A	B	B	B	B	B	B	A	A	A	B	B	B	B	B	B	A	B	B	B	A
135	1B	61639	IWB61639	RAC875_rep_c106876_446	42.4	B	A	A	B	C	A	B	A	B	B	A	A	A	B	A	B	A	B	A	B	B	B	B	A	B	B	B	B	B	B	A	A	A	B	B	B	B	B	B	A	B	B	B	A
136	1B	24642	IWB24642	Excalibur_c27915_560	42.9	B	A	A	B	C	A	B	A	B	B	A	A	A	B	A	B	A	B	A	B	B	B	B	A	B	B	B	B	B	B	A	A	A	B	B	B	B	B	B	A	B	B	B	A
137	1B	65251	IWB65251	RFL_Contig7_380	44	B	A	A	B	A	A	B	A	B	B	A	A	A	A	A	B	A	B	A	B	B	B	B	A	B	B	B	B	B	B	A	A	A	B	B	A	B	B	B	A	B	B	B	A
138	1B	9781	IWB9781	BS00066338_51	44.3	B	A	A	B	C	A	B	A	B	B	A	A	A	A	A	B	A	B	A	B	B	B	B	A	B	B	B	B	B	B	A	A	A	B	B	A	B	B	B	A	B	B	B	A
139	1B	9548	IWB9548	BS00065443_51	45	B	C	A	B	B	A	B	A	B	B	A	A	A	C	A	C	A	B	A	B	B	B	B	C	B	B	B	C	B	B	A	C	C	B	B	A	B	B	B	A	B	B	B	A
140	1B	13742	IWB13742	CAP7_c1137_53	45.6	B	A	A	B	A	A	B	A	B	B	A	A	A	A	A	B	A	B	A	B	B	B	B	A	B	B	B	B	B	B	A	A	A	B	B	A	B	B	B	A	B	B	B	A
141	1B	58887	IWB58887	RAC875_c52957_154	46.2	B	A	A	B	A	A	B	A	B	B	A	A	A	A	A	B	A	B	A	B	B	B	B	A	B	B	B	C	B	B	A	A	A	B	B	A	B	B	B	A	B	B	B	A
142	1B	4407	IWB4407	BobWhite_c8016_301	48.5	B	A	A	B	A	A	B	A	B	B	A	A	A	A	A	B	A	B	A	B	B	B	B	A	B	B	B	B	B	B	A	A	A	B	B	A	B	B	B	A	A	B	B	A
143	1B	81365	IWA8246	wsnp_RFL_Contig1493_681815	49	B	A	A	B	C	A	B	A	B	B	A	A	A	A	A	B	A	B	A	B	B	B	A	A	B	B	B	B	B	B	A	A	A	B	B	A	B	B	B	A	A	B	B	A
144	1B	77464	IWA3017	wsnp_Ex_c26083_35336771	49.3	B	A	A	B	A	A	B	A	B	B	A	A	A	A	A	B	A	B	A	B	B	B	A	A	B	B	B	B	B	B	A	A	A	B	B	A	B	B	B	A	A	B	B	A
145	1B	13134	IWB13134	CAP11_rep_c7035_189	52.2	B	A	A	B	A	B	B	A	B	B	A	A	A	A	A	B	A	B	A	B	B	B	A	A	B	B	B	B	B	B	A	A	A	B	A	A	B	B	B	A	A	B	B	C
146	1B	35890	IWB35890	IACX2961	53	B	A	A	B	A	B	B	A	B	B	A	A	A	A	A	B	A	B	A	B	B	B	A	A	B	B	B	B	C	B	A	A	A	B	A	A	B	B	B	A	A	B	A	A
147	1B	1415	IWB1415	BobWhite_c20621_541	53.3	B	A	A	B	A	B	B	A	B	B	A	A	A	A	A	B	A	A	A	B	B	B	A	A	B	B	B	B	C	B	A	A	A	B	A	A	B	B	B	A	A	B	A	A
148	1B	10069	IWB10069	BS00067526_51	54.1	B	A	A	A	A	B	B	A	B	B	A	A	A	A	A	B	A	A	A	B	B	B	A	A	B	B	C	B	B	B	A	A	A	B	A	A	B	B	B	A	A	B	A	A
149	1B	6947	IWB6947	BS00022176_51	55.2	B	A	A	A	A	B	B	A	B	B	A	A	A	A	A	B	A	A	A	B	B	B	A	A	B	B	C	B	A	B	A	A	A	B	A	A	B	B	B	A	A	B	A	A
150	1B	77837	IWA3497	wsnp_Ex_c34765_43024979	59.3	B	B	A	A	A	B	B	B	A	B	A	A	A	A	A	B	A	A	A	B	B	B	A	A	B	B	C	B	A	B	A	A	A	B	A	A	B	B	A	A	A	B	A	A
151	1B	77524	IWA3097	wsnp_Ex_c27176_36393952	59.9	B	B	A	A	A	B	B	B	A	B	A	A	A	A	A	B	A	A	A	B	B	B	A	A	B	B	C	B	A	B	B	A	A	B	A	A	B	B	A	A	A	B	A	A
152	1B	56046	IWB56046	RAC875_c27273_334	60.1	B	B	A	A	A	B	B	B	A	B	A	A	A	A	A	B	A	A	A	B	B	B	A	A	B	B	C	B	A	B	B	A	A	B	A	A	B	B	A	A	A	B	A	A
153	1B	35108	IWB35108	IAAV5863	60.7	B	B	A	A	A	B	B	B	A	B	A	A	A	A	A	B	A	A	A	B	B	B	A	A	B	B	C	B	A	B	B	A	A	B	A	A	B	B	A	A	A	B	A	A
154	1B	60663	IWB60663	RAC875_c818_1185	61.5	B	B	A	A	C	B	B	B	A	B	A	A	A	A	A	B	A	A	A	B	B	B	A	A	B	B	C	B	A	B	B	A	A	B	A	A	B	B	A	B	A	B	A	A
155	1B	9116	IWB9116	BS00063721_51	62.1	B	B	A	A	C	B	B	B	A	B	A	A	A	A	A	B	A	A	A	B	B	B	A	A	B	B	C	A	A	B	B	A	A	B	A	A	B	B	A	B	A	B	A	A
156	1B	26319	IWB26319	Excalibur_c42301_54	62.4	B	B	A	A	A	B	B	B	A	B	A	A	A	A	A	B	A	A	A	B	B	B	A	A	B	B	C	A	A	B	B	A	A	B	A	A	B	B	A	B	A	B	A	A
157	1B	10454	IWB10454	BS00070285_51	63.5	B	B	A	A	A	B	B	B	A	B	A	A	A	A	A	B	A	A	A	B	B	B	A	A	B	B	C	A	A	A	B	A	A	B	A	A	B	B	A	B	A	B	A	A
158	1B	6805	IWB6805	BS00021934_51	63.8	B	B	A	A	C	B	B	B	A	B	A	A	A	A	A	B	A	A	A	B	B	B	A	A	B	B	C	A	A	A	B	A	A	B	A	A	B	B	A	B	A	B	A	A
159	1B	46397	IWB46397	Kukri_c5407_192	64.7	B	B	A	A	A	B	B	B	A	B	A	A	A	A	A	B	A	A	A	B	B	B	A	A	B	B	C	A	A	A	B	A	B	B	A	A	B	B	A	B	A	B	A	A
160	1B	11885	IWB11885	BS00094562_51	66.7	B	B	A	A	A	B	B	B	A	B	A	A	A	A	A	B	C	A	A	B	B	B	A	A	A	B	C	A	A	A	B	A	B	B	A	A	B	B	A	B	A	B	A	A
161	1B	8840	IWB8840	BS00061472_51	67.3	B	B	A	A	A	B	B	B	A	B	A	A	A	A	A	B	C	A	A	B	B	B	A	A	A	B	C	A	A	A	B	A	B	B	A	A	B	B	A	B	A	B	A	A
162	1B	44606	IWB44606	Kukri_c36758_140	70.3	B	B	A	A	C	B	B	B	A	B	A	A	A	A	A	B	C	A	A	B	B	B	A	A	A	B	C	A	A	A	B	A	B	B	A	A	B	B	A	B	A	B	A	A
163	1B	13473	IWB13473	CAP12_c590_307	70.5	B	B	A	A	A	B	B	B	A	B	A	A	A	A	A	B	C	A	A	B	B	B	A	A	A	B	C	A	A	A	B	A	B	B	A	A	B	B	A	B	A	B	A	A
164	1B	59155	IWB59155	RAC875_c55934_165	72.8	B	B	A	A	A	B	B	B	A	B	A	A	B	A	A	B	C	A	A	B	B	B	A	A	A	B	B	A	A	A	B	A	B	B	A	B	B	B	A	B	A	B	A	A
165	1B	75926	IWA848	wsnp_CAP11_rep_c4138_1957470	73.1	B	B	A	A	A	B	B	B	A	B	A	A	B	A	A	B	B	A	A	B	B	B	A	A	A	B	B	A	A	A	B	A	B	B	A	B	B	B	A	B	A	B	A	A
166	1B	34935	IWB34935	IAAV4844	73.4	B	B	A	A	C	B	B	B	A	B	A	A	B	A	A	B	B	A	A	B	B	B	A	A	A	B	B	A	A	A	B	A	B	B	A	B	B	B	A	B	A	B	A	A
167	1B	73912	IWB73912	Tdurum_contig94450_255	77.2	B	A	A	A	A	A	B	B	A	B	A	A	B	A	A	B	B	A	A	B	B	B	A	A	A	B	B	A	A	A	B	B	B	B	A	B	B	B	A	B	B	B	A	A
168	1B	71704	IWB71704	Tdurum_contig46647_623	77.4	B	A	A	A	A	A	B	B	A	B	A	A	B	A	A	B	B	A	A	B	B	B	A	A	A	B	B	A	A	A	B	B	B	B	A	B	B	B	A	B	B	B	A	A
169	1B	40850	IWB40850	Kukri_c1259_864	77.7	B	A	A	A	A	A	B	B	A	B	A	A	B	A	A	B	B	A	A	B	B	B	A	A	A	B	B	A	A	A	B	B	B	B	A	B	B	B	A	B	B	B	A	A
170	1B	1342	IWB1342	BobWhite_c20073_443	85.3	B	A	A	B	A	A	B	B	A	B	A	A	B	A	A	B	B	A	B	B	B	B	A	A	A	C	B	A	A	A	B	B	B	B	A	B	B	B	A	B	B	A	A	A
171	1B	31957	IWB31957	GENE-0543_201	87.3	B	A	A	B	A	A	B	B	A	B	A	A	B	A	A	B	B	A	B	B	B	B	A	A	A	B	B	A	A	A	B	B	B	B	B	B	B	B	A	B	B	A	A	A
172	1B	38247	IWB38247	Ku_c11537_539	87.5	B	A	A	B	A	A	B	B	A	B	A	A	B	A	A	B	B	A	B	B	B	B	A	A	A	B	B	A	A	A	B	B	B	B	B	B	B	B	A	B	B	A	A	A
173	1B	73820	IWB73820	Tdurum_contig92835_177	87.8	B	A	A	B	A	A	B	B	A	B	B	A	B	A	A	B	B	A	B	B	B	B	A	A	A	B	B	A	A	A	B	B	B	B	B	B	B	B	A	B	B	A	A	A
174	1D	46457	IWB46457	Kukri_c54820_382	0	B	B	A	B	C	B	A	B	B	A	A	B	A	A	A	B	C	A	B	A	B	B	B	A	A	B	B	A	A	A	B	C	B	B	B	A	B	B	A	B	B	A	A	A
175	1D	5769	IWB5769	BS00000744_51	1.5	B	B	A	B	C	B	A	B	B	A	A	B	A	A	A	B	B	A	B	A	B	B	B	A	A	B	B	A	A	A	B	C	B	B	B	A	B	B	A	B	B	B	A	A
176	1D	8742	IWB8742	BS00058612_51	3.8	B	A	B	B	C	B	A	B	B	A	A	A	A	A	A	B	B	A	A	B	B	B	B	A	A	B	B	A	A	A	B	C	B	B	B	A	B	B	A	B	B	B	A	A
177	1D	5897	IWB5897	BS00003806_51	4.1	B	A	B	B	C	B	A	B	B	A	A	A	A	A	A	B	B	A	A	B	B	B	B	A	A	B	B	A	A	A	B	A	B	B	B	A	B	B	A	B	B	B	A	A
178	1D	59230	IWB59230	RAC875_c56811_258	9.9	B	A	B	B	C	B	A	B	B	B	A	A	A	A	B	B	B	A	A	B	B	A	A	A	A	B	B	A	A	A	B	C	B	B	B	A	B	B	A	B	A	B	A	A
179	1D	30125	IWB30125	Excalibur_rep_c105429_654	10.2	B	A	B	B	A	B	A	B	B	B	A	A	A	A	B	B	B	A	A	B	B	A	A	A	A	B	B	A	A	A	B	A	B	B	B	A	B	B	A	B	A	B	A	A
180	1D	76544	IWA1787	wsnp_Ex_c1358_2600929	10.4	B	A	B	B	C	B	A	B	B	B	A	A	A	A	B	B	B	A	A	B	B	A	A	A	A	B	B	A	A	A	B	C	B	B	B	A	B	B	A	B	A	B	A	A
181	1D		cfd15		12.1	A	A	B	B	A	B	A	A	A	B	A	A	A	A	B	B	A	A	A	B	B	A	A	A	A	B	B	A	A	A	B	A	B	B	B	A	B	B	A	B	A	B	A	A
182	1D	80087	IWA6500	wsnp_Ku_c13622_21660346	15.1	B	A	B	A	C	B	A	B	B	B	A	A	A	A	B	B	A	A	A	B	B	A	A	A	A	B	B	A	A	A	B	C	B	B	B	B	B	B	A	B	A	B	A	A
183	1D	65070	IWB65070	RFL_Contig5639_1168	16.2	B	A	B	A	C	B	A	B	B	B	A	A	A	A	B	C	A	A	A	B	B	A	A	A	A	B	B	A	A	A	B	C	B	B	B	B	B	B	A	B	A	B	A	A
184	1D	35395	IWB35395	IAAV7856	16.7	B	A	B	A	A	B	A	B	B	B	A	A	A	A	B	C	A	A	A	B	B	A	A	A	A	B	B	A	A	A	B	C	B	B	B	B	B	B	A	B	A	B	A	A
185	1D	21003	IWB21003	Ex_c6145_833	17	B	A	B	A	A	B	A	B	B	B	A	A	A	A	B	C	A	A	A	B	B	A	A	A	A	B	B	A	A	A	B	C	B	B	B	B	B	B	A	B	A	B	A	A
186	1D	15128	IWB15128	D_contig00332_312	17.3	B	A	B	A	A	B	A	B	B	B	A	A	A	A	B	C	A	A	A	B	B	A	A	A	A	B	B	A	A	A	B	C	B	B	B	B	B	B	A	B	A	B	A	A
187	1D	31245	IWB31245	Excalibur_rep_c75168_337	17.9	B	A	B	A	A	B	A	B	B	B	A	A	A	A	B	C	A	A	A	B	B	A	A	A	A	B	B	A	A	A	B	C	B	B	B	B	B	B	A	B	B	B	A	A
188	1D		cfd61		18.2	B	A	B	A	A	B	A	B	B	B	A	A	A	A	B	A	A	A	A	B	B	A	A	A	A	B	B	A	A	A	B	A	B	B	B	B	B	B	A	B	B	B	A	A
189	1D	13406	IWB13406	CAP12_c46_333	18.7	B	A	B	A	A	B	A	B	B	B	A	A	A	A	B	C	B	A	A	B	B	A	A	A	A	B	B	A	A	A	B	C	B	B	B	B	B	B	A	B	B	B	A	A
190	1D	56136	IWB56136	RAC875_c27954_378	20.1	B	A	B	A	A	B	A	B	B	B	A	A	B	A	B	C	B	A	A	B	B	B	A	A	A	B	B	A	A	A	B	C	B	B	B	B	B	B	A	B	B	B	A	A
191	1D	35354	IWB35354	IAAV7510	21	B	A	B	A	A	B	A	B	B	B	A	A	B	A	B	C	B	A	A	B	B	B	A	A	A	B	B	A	A	A	B	C	B	B	B	B	B	B	A	B	B	B	A	C
192	1D	33350	IWB33350	GENE-3348_203	27.3	B	A	B	B	A	B	A	B	B	B	A	A	B	A	B	B	B	A	B	B	B	B	A	A	A	A	C	C	A	A	B	B	B	B	B	B	B	B	B	B	B	B	A	A
193	1D	22792	IWB22792	Excalibur_c16452_624	28.2	B	A	B	B	A	B	A	B	B	B	A	A	B	A	A	B	B	A	B	B	B	B	A	A	A	A	B	A	A	A	B	B	B	B	B	B	C	B	B	B	B	B	A	C
194	1D	5767	IWB5767	BS00000717_51	31.2	B	A	B	B	A	A	A	B	B	B	A	A	B	A	A	B	B	A	B	B	B	B	A	A	A	B	B	A	A	A	B	B	B	B	B	A	C	B	B	B	B	B	A	C
195	1D	79028	IWA5018	wsnp_Ex_rep_c101500_86856089	31.4	B	A	B	B	A	A	A	B	B	B	A	A	B	A	A	B	B	A	B	B	B	B	A	A	A	B	B	A	A	A	B	B	B	B	B	A	C	B	B	B	B	B	A	C
196	1D	36051	IWB36051	IACX589	31.7	B	A	B	B	A	A	A	B	B	B	A	A	B	A	A	B	B	A	B	B	B	B	A	A	A	B	B	A	A	A	B	B	B	B	B	A	C	B	B	B	B	B	A	C
197	1D	6766	IWB6766	BS00021851_51	37.8	B	A	B	B	A	A	A	B	B	B	A	A	B	B	A	B	B	A	B	B	B	B	A	A	B	B	B	A	A	A	B	A	B	A	B	A	C	B	A	B	B	B	A	A
198	1D	35153	IWB35153	IAAV614	38.1	B	A	B	B	A	A	A	B	B	B	A	A	B	B	A	B	B	A	B	B	B	B	A	A	B	B	B	A	A	A	B	A	B	B	B	A	C	B	A	B	B	B	A	A
199	1D	10919	IWB10919	BS00077237_51	38.4	B	A	B	B	A	A	A	B	B	B	A	A	B	B	A	B	B	A	B	B	B	B	A	A	B	B	B	A	A	A	B	A	B	B	B	A	C	B	A	B	B	B	A	A
200	1D	46950	IWB46950	Kukri_c6167_1271	38.9	B	A	B	B	A	A	A	B	B	B	A	A	B	B	A	B	B	A	B	B	B	B	A	A	B	B	B	A	A	A	B	A	B	B	B	A	C	B	A	B	B	B	A	A
201	1D	10598	IWB10598	BS00072193_51	39.2	B	A	B	B	A	A	A	B	B	B	A	A	B	B	A	B	B	A	B	B	B	B	A	A	A	B	B	A	A	A	B	A	B	B	B	A	C	B	A	B	B	B	A	A
202	1D	14969	IWB14969	CAP8_c879_120	39.5	B	A	B	B	A	A	A	B	B	B	A	A	B	B	A	B	B	A	B	B	B	B	A	A	A	B	B	A	A	B	B	A	B	B	B	A	C	B	A	B	B	B	A	A
203	1D	49565	IWB49565	Kukri_rep_c112609_711	42.7	B	A	B	B	A	A	A	B	B	B	A	A	B	B	A	B	B	A	B	B	B	B	A	B	A	B	B	A	A	B	B	B	B	B	B	A	C	B	A	B	B	B	A	A
204	1D		cfd72		46.6	B	A	B	B	A	A	A	B	B	B	A	B	B	B	A	B	B	A	B	B	B	B	A	B	A	B	B	A	A	B	B	B	B	B	B	B	B	B	B	B	B	B	B	A
205	1D	6869	IWB6869	BS00022027_51	49.6	B	A	B	B	A	A	A	B	B	B	A	C	A	B	A	B	B	A	B	B	B	B	A	A	A	B	B	A	A	B	B	B	B	B	B	B	C	B	B	B	B	B	B	C
206	1D	15872	IWB15872	D_contig17513_167	49.9	B	A	B	B	A	A	A	B	B	B	A	C	A	B	A	B	B	A	B	B	B	B	A	A	A	B	B	A	A	B	B	B	B	B	B	B	C	B	B	B	B	B	B	C
207	1D		wmc429		50.5	B	A	B	B	A	A	A	B	B	B	A	C	A	B	A	B	B	A	B	B	B	B	A	A	A	B	B	A	A	B	B	B	B	B	B	B	C	B	B	B	B	B	B	A
208	1D	20523	IWB20523	Ex_c33668_180	51	B	A	B	B	A	A	A	B	B	B	A	C	A	B	A	B	B	A	B	B	B	B	A	A	A	B	B	A	A	B	B	B	B	B	B	B	C	B	B	B	B	B	B	A
209	1D	27449	IWB27449	Excalibur_c54055_694	53	B	A	B	B	A	A	A	B	B	B	A	C	A	B	A	B	B	A	B	B	B	B	A	A	A	B	A	A	A	B	B	B	A	B	B	B	C	B	B	B	B	B	B	A
210	1D	15913	IWB15913	D_contig18159_408	53.6	B	A	B	B	A	A	A	B	B	B	A	C	A	B	A	B	B	A	B	B	B	B	A	A	A	B	A	A	A	B	B	B	A	B	B	B	C	B	B	B	B	B	B	A
211	1D	17017	IWB17017	D_contig66051_204	54.2	B	A	B	B	A	A	A	B	B	B	A	C	A	B	A	B	B	A	B	B	B	B	A	C	A	B	A	A	A	B	B	B	A	B	B	B	C	B	B	B	B	B	C	A
212	1D	42195	IWB42195	Kukri_c19768_568	61.2	B	A	A	B	A	B	A	B	B	B	A	A	B	B	A	B	B	A	B	B	B	B	A	B	B	B	B	A	A	B	B	B	A	B	B	B	C	B	B	B	B	B	C	A
213	1D	15740	IWB15740	D_contig14507_369	61.8	B	A	A	B	A	B	A	B	B	B	A	A	B	B	A	B	B	A	B	B	B	B	A	B	B	B	B	A	A	B	B	B	A	B	B	B	C	B	B	B	B	B	C	A
214	1D	17397	IWB17397	D_F5MV3MU01AQZAG_388	63.2	B	A	A	B	A	B	A	B	B	B	A	A	B	B	A	B	B	A	B	B	B	B	A	A	B	B	B	A	A	B	B	B	A	B	B	B	B	B	B	B	B	B	C	A
215	1D	75717	IWA555	wsnp_BG313767D_Ta_2_1	65.2	B	A	A	B	A	B	A	B	B	B	A	A	B	B	A	B	B	A	B	B	B	B	A	A	B	B	B	A	A	B	B	B	A	B	B	B	B	B	B	B	B	A	B	A
216	1D	81390	IWA8286	wsnp_RFL_Contig2036_1264133	66.6	B	A	A	B	A	B	A	B	B	B	A	A	B	B	A	B	B	A	B	B	B	B	A	A	B	B	B	A	A	B	B	B	A	B	B	B	A	B	B	B	B	A	B	A
217	1D	41029	IWB41029	Kukri_c1338_646	66.9	B	A	A	B	A	B	A	B	B	B	A	A	B	B	A	B	B	A	B	B	B	B	A	A	B	B	B	A	A	B	B	B	A	B	B	B	A	B	B	B	B	A	B	A
218	1D	57981	IWB57981	RAC875_c43831_91	71.1	B	A	A	B	A	A	B	B	B	B	A	A	B	B	A	B	B	A	B	B	B	B	A	A	B	B	B	A	A	B	B	B	A	B	B	B	B	C	B	B	B	A	B	A
219	1D	40888	IWB40888	Kukri_c12758_2101	72.5	B	A	A	B	A	A	B	B	B	B	A	A	B	B	A	B	B	A	B	B	B	B	A	A	B	B	B	A	A	B	B	B	A	B	B	B	B	B	A	B	B	A	B	A
220	1D	79467	IWA5577	wsnp_Ex_rep_c69024_67924125	72.8	B	A	A	B	A	A	B	B	B	B	A	A	B	B	A	A	B	A	B	B	B	B	A	A	B	B	B	A	A	B	B	B	A	B	B	B	B	B	A	B	B	A	B	A
221	1D	79204	IWA5234	wsnp_Ex_rep_c66423_64641115	73	B	A	A	B	A	A	B	B	B	B	A	A	B	B	A	A	B	A	B	B	B	B	A	A	B	B	B	A	A	B	B	B	A	A	B	B	B	B	A	B	B	A	B	A
222	1D	9742	IWB9742	BS00066188_51	73.6	B	A	A	B	A	A	B	B	B	B	A	A	B	B	A	A	B	A	B	B	B	B	A	A	B	B	B	B	A	B	B	B	A	A	B	B	B	B	A	B	B	A	B	A
223	1D	7679	IWB7679	BS00028216_51	74.1	B	A	A	B	A	A	B	B	B	B	A	A	B	B	A	A	B	A	B	B	B	B	A	A	B	B	B	B	A	B	B	B	A	A	B	B	B	B	A	B	B	A	B	A
224	1D	51772	IWB51772	Ra_c3045_1739	74.4	B	A	A	B	A	A	B	B	B	B	A	A	B	B	A	A	B	A	B	B	B	B	A	A	B	A	B	B	A	B	B	B	A	A	B	B	B	B	A	B	B	A	B	A
225	1D	27436	IWB27436	Excalibur_c53900_86	75	B	A	A	B	A	A	B	B	B	B	A	A	B	B	A	A	B	A	B	B	B	B	A	A	B	A	B	B	A	B	B	B	A	A	B	B	B	B	A	B	B	A	B	A
226	1D	80961	IWA7675	wsnp_Ra_c17989_26960545	75.2	B	A	A	B	A	A	B	B	B	B	A	A	B	B	A	A	B	A	B	B	B	B	A	A	B	A	B	B	A	B	B	B	A	A	B	B	B	B	A	B	B	A	B	A
227	1D	65240	IWB65240	RFL_Contig651_953	75.5	B	A	A	B	A	A	B	B	B	B	A	A	B	B	A	A	B	A	B	B	B	B	A	A	B	A	B	B	A	B	B	B	A	A	B	B	B	B	A	B	B	A	B	A
228	1D	5900	IWB5900	BS00003816_51	77.8	B	A	A	B	A	A	B	B	B	B	A	A	B	B	A	A	B	A	B	B	B	B	A	A	B	A	B	A	A	A	B	B	A	A	B	B	B	B	A	B	B	A	B	A
229	1D	14873	IWB14873	CAP8_c6630_63	88.1	B	A	A	A	A	A	B	A	A	B	C	A	B	B	A	A	B	A	B	B	A	B	B	A	B	A	B	A	A	A	B	B	A	A	B	B	B	A	B	B	A	A	B	A
230	1D	35836	IWB35836	IACX21015	95.6	B	B	A	A	B	A	B	A	A	B	C	A	B	B	A	A	B	B	B	B	B	B	B	A	B	A	B	A	B	B	B	B	A	A	B	B	B	A	B	B	A	A	B	A
231	1D	35902	IWB35902	IACX314	104.7	B	B	A	A	B	A	B	A	A	A	C	B	B	B	B	A	B	B	B	A	C	B	B	A	B	A	B	A	B	B	B	B	A	A	B	B	B	A	B	B	A	A	B	A
232	1D	47464	IWB47464	Kukri_c6896_3239	107.1	B	B	A	A	B	A	B	A	A	A	C	B	B	B	B	A	B	B	B	A	C	B	B	A	B	A	B	A	B	B	B	B	A	A	B	B	B	A	B	B	A	A	B	A
233	1D	40950	IWB40950	Kukri_c13039_858	107.3	B	B	A	A	B	A	B	A	A	A	C	B	B	B	B	A	B	B	B	A	A	B	B	A	B	A	B	A	B	B	B	B	A	A	B	B	B	A	B	B	A	A	B	A
234	1D	35900	IWB35900	IACX310	112.5	A	B	B	A	B	A	B	A	A	A	C	B	B	B	B	A	B	B	B	A	B	B	B	A	B	A	B	A	B	B	B	B	B	A	B	B	B	A	B	B	A	A	B	A
235	1D	10690	IWB10690	BS00073763_51	112.8	A	B	B	A	B	A	B	A	A	A	C	B	B	B	B	A	B	B	B	A	B	B	B	A	B	A	B	A	B	B	B	B	B	A	B	B	B	A	B	B	A	A	B	A
236	1D	15906	IWB15906	D_contig18068_87	113.4	A	B	B	A	B	A	B	A	A	A	C	B	B	B	B	A	B	B	B	A	B	B	B	A	B	A	B	A	B	B	B	B	B	A	B	B	B	A	B	B	A	A	B	A
237	1D	6051	IWB6051	BS00009377_51	114.2	A	B	B	A	B	A	B	B	A	A	C	B	B	B	B	A	B	B	B	A	B	B	B	A	B	A	B	A	B	B	B	B	B	A	B	B	B	A	A	B	A	A	A	A
238	1D	9069	IWB9069	BS00063511_51	115.6	A	B	B	A	B	A	B	B	A	A	C	B	B	B	B	A	B	B	B	A	B	B	B	A	B	A	B	A	A	B	B	B	B	A	B	B	B	A	A	B	A	A	A	A
239	1D	64331	IWB64331	RFL_Contig3395_1575	116.8	A	B	B	A	B	A	B	B	A	A	B	A	B	A	B	A	B	B	B	A	B	B	B	A	B	A	B	A	A	B	B	B	B	A	B	B	B	A	A	B	A	A	A	A
240	1D	7196	IWB7196	BS00022654_51	119	A	B	B	A	B	A	B	B	A	A	B	A	B	A	B	A	B	B	B	A	B	B	B	A	B	A	B	A	A	B	B	B	A	A	B	B	B	A	A	B	A	A	A	A
241	1D	16627	IWB16627	D_contig35004_260	119.9	A	B	B	A	B	A	B	B	A	A	B	A	B	B	B	A	B	B	B	A	B	B	B	A	B	A	B	A	A	B	B	B	A	A	B	B	B	A	A	B	A	A	A	A
242	1D	17052	IWB17052	D_contig68025_825	120.7	A	B	B	A	B	A	B	B	A	A	B	A	B	B	B	A	B	B	B	A	B	B	B	A	B	A	B	A	A	B	B	B	A	A	B	B	B	A	A	B	A	A	A	A
243	2A	12250	IWB12250	BS00105593_51	0	A	B	B	A	A	A	B	B	A	B	A	B	A	B	B	A	B	C	B	B	A	A	A	B	B	B	A	B	A	A	A	B	B	C	B	B	A	B	A	A	A	A	B	B
244	2A	76319	IWA1511	wsnp_Ex_c11560_18632698	0.3	A	B	B	A	A	A	B	B	A	B	A	B	A	B	B	A	B	A	B	B	A	A	A	B	B	B	A	B	A	A	A	B	B	A	B	B	A	B	A	A	A	A	B	B
245	2A	17107	IWB17107	D_contig71899_62	1.5	A	B	B	A	A	A	B	B	A	B	A	B	A	B	A	A	B	A	B	B	A	A	A	B	B	B	A	C	A	A	A	B	B	C	B	B	A	C	A	A	C	A	B	B
246	2A	45191	IWB45191	Kukri_c42095_196	10.5	A	B	B	A	A	A	B	B	A	B	B	B	A	B	A	B	B	A	B	A	A	A	A	A	B	B	A	B	A	A	A	B	B	C	B	B	A	B	B	A	B	A	B	B
247	2A	43984	IWB43984	Kukri_c31508_91	10.7	A	B	B	A	A	A	B	B	A	B	B	B	A	B	A	B	B	C	B	A	A	A	A	A	B	B	A	A	A	A	A	B	B	C	B	B	A	B	B	A	B	A	B	B
248	2A	76112	IWA1242	wsnp_CAP8_rep_c9132_3977980	11	A	B	B	A	A	A	B	B	A	B	B	B	A	B	A	A	B	A	B	A	A	A	A	A	B	B	A	A	A	A	A	B	B	A	B	B	A	B	B	A	B	A	B	B
249	2A	53380	IWB53380	RAC875_c11652_544	11.3	A	B	B	A	A	A	B	B	A	B	B	B	A	B	A	A	B	A	B	A	A	A	A	A	B	B	A	A	A	A	A	B	B	A	B	B	A	B	B	A	B	A	B	B
250	2A	4006	IWB4006	BobWhite_c58481_104	11.5	A	B	B	A	A	A	B	B	A	B	B	B	A	B	A	A	B	A	B	A	A	A	A	A	B	B	A	A	A	A	A	B	B	C	B	B	A	B	B	A	B	A	B	B
251	2A	31703	IWB31703	GENE-0137_147	12.4	A	B	B	A	A	A	B	B	A	B	B	B	A	B	A	A	B	A	B	A	A	A	A	A	B	B	A	A	A	A	A	B	B	C	B	B	A	B	B	A	B	A	B	B
252	2A	16752	IWB16752	D_contig38301_325	12.7	A	B	B	A	A	A	B	B	A	B	B	B	A	B	A	A	B	A	B	A	A	A	A	A	B	B	A	A	A	A	A	B	B	C	B	A	A	B	B	A	B	A	B	B
253	2A	7112	IWB7112	BS00022487_51	12.9	A	B	B	A	A	A	B	B	A	B	B	B	A	B	A	A	B	A	B	A	A	A	A	A	B	B	A	A	A	A	A	B	B	A	B	B	A	B	B	A	B	A	B	B
254	2A	79082	IWA5087	wsnp_Ex_rep_c103167_88181968	14.7	A	B	B	A	A	A	B	A	A	B	B	B	A	B	A	A	B	A	B	A	A	A	A	A	B	A	A	C	A	A	A	B	B	A	B	B	C	B	B	A	B	C	B	B
255	2A	38844	IWB38844	Ku_c23118_149	15.6	A	B	B	A	A	A	B	A	A	B	B	B	A	B	A	A	B	A	B	A	A	A	A	A	B	A	A	A	A	A	A	B	B	A	B	B	A	B	B	A	B	A	B	B
256	2A	29812	IWB29812	Excalibur_rep_c102244_1103	17.6	A	B	B	A	A	A	B	A	A	B	B	B	A	B	A	A	B	C	B	A	A	B	A	A	B	A	A	A	A	A	A	B	B	A	A	B	A	B	B	A	B	A	A	B
257	2A	1996	IWB1996	BobWhite_c26374_339	20.1	A	B	B	A	A	A	A	A	A	B	B	B	A	B	A	A	B	C	B	A	A	B	A	A	B	A	A	A	A	A	A	B	B	A	B	A	A	B	B	B	B	A	A	B
258	2A	40060	IWB40060	Ku_c8180_291	26	A	B	B	A	A	A	A	A	A	B	B	B	B	B	A	A	B	A	B	A	A	B	A	A	A	B	A	A	A	A	A	B	B	B	B	A	A	B	B	B	B	A	A	B
259	2A	10811	IWB10811	BS00075524_51	26.9	A	B	B	A	A	A	A	A	A	B	B	B	B	B	A	A	B	A	B	A	A	B	A	A	B	B	A	A	A	A	A	A	B	B	B	A	A	B	B	B	B	A	A	B
260	2A	41737	IWB41737	Kukri_c1728_1876	28.3	B	B	B	A	A	A	A	A	A	B	B	B	B	B	A	A	B	A	B	A	A	B	A	A	B	B	A	A	A	A	A	A	B	B	B	A	A	B	B	B	B	A	A	B
261	2A	1222	IWB1222	BobWhite_c18852_91	28.5	B	B	B	A	A	A	A	A	A	B	B	B	B	B	A	A	B	C	B	A	A	B	A	A	B	B	A	A	A	A	A	A	B	B	B	A	A	B	B	B	B	A	A	B
262	2A	8363	IWB8363	BS00044274_51	28.8	B	B	B	A	A	A	A	A	A	B	B	B	B	B	A	A	B	C	B	A	A	B	A	A	B	B	A	A	A	A	A	A	B	B	B	A	B	B	B	B	B	A	A	B
263	2A	77856	IWA3520	wsnp_Ex_c35331_43499339	29.1	B	B	B	A	A	A	A	A	A	B	B	B	B	B	A	A	B	C	B	A	A	B	A	A	B	B	A	A	A	A	A	A	B	B	B	A	B	B	B	B	B	A	A	B
264	2A	5782	IWB5782	BS00001107_51	34.6	B	B	B	A	A	A	A	A	A	B	A	B	B	B	A	A	B	A	B	A	A	B	A	A	B	B	B	B	A	A	A	A	B	C	B	B	A	B	B	B	B	A	A	B
265	2A	77259	IWA2730	wsnp_Ex_c22645_31845530	37.5	B	B	B	A	A	A	A	A	A	B	A	B	A	A	A	A	B	A	B	A	A	B	A	A	B	B	B	B	A	A	A	A	B	B	B	B	A	B	B	B	A	A	A	B
266	2A	73849	IWB73849	Tdurum_contig93115_517	40	B	B	B	A	A	A	A	A	A	B	A	B	A	A	A	A	B	A	B	A	A	B	A	A	B	B	B	B	A	A	B	A	B	C	B	B	A	A	B	B	A	A	A	B
267	2A	72481	IWB72481	Tdurum_contig560_297	44.7	B	B	B	A	A	A	A	A	A	B	A	B	A	A	A	A	B	A	B	A	A	B	B	A	B	B	B	B	A	A	B	A	B	C	B	B	A	A	A	B	A	B	A	B
268	2A	71526	IWB71526	Tdurum_contig44400_1610	45.3	B	B	B	A	A	A	A	A	A	B	A	B	A	A	A	A	B	A	B	A	A	B	B	A	B	B	B	B	A	A	B	A	B	C	B	B	A	A	A	B	A	B	A	B
269	2A	35722	IWB35722	IACX1216	45.6	B	B	B	A	A	A	A	A	A	B	A	B	A	A	A	A	B	A	B	A	A	B	B	A	B	B	B	B	A	A	B	A	B	B	B	B	A	A	A	B	A	B	A	B
270	2A	44985	IWB44985	Kukri_c40035_258	46.1	B	B	B	A	A	A	A	A	A	B	A	B	A	A	A	A	B	A	B	A	A	B	B	A	B	B	B	B	A	A	B	A	B	B	B	B	A	A	A	B	A	A	A	B
271	2A	55668	IWB55668	RAC875_c24517_558	46.4	B	B	B	A	A	A	A	A	A	B	A	B	A	A	A	A	B	A	B	A	A	B	B	A	B	B	B	B	A	A	B	A	B	B	B	B	A	A	A	B	A	A	A	B
272	2A	6749	IWB6749	BS00021739_51	46.9	B	B	B	A	A	A	A	A	A	B	A	B	A	A	A	A	B	A	A	A	A	B	B	A	B	B	B	B	A	A	B	A	B	C	B	B	A	A	A	B	A	A	A	B
273	2A	66114	IWB66114	TA013564-0487	47.5	B	B	B	A	A	A	A	A	A	B	A	B	A	A	A	A	B	A	A	A	A	B	B	A	B	B	B	B	A	A	B	A	B	B	B	B	A	A	A	B	A	A	A	B
274	2A	45503	IWB45503	Kukri_c45015_363	48.9	A	B	B	A	A	A	B	A	A	B	A	B	A	A	A	A	B	A	A	A	A	B	B	A	B	B	B	B	A	A	B	A	B	B	B	A	A	A	A	B	A	A	A	B
275	2A	27915	IWB27915	Excalibur_c59901_433	49.1	A	B	B	A	A	A	B	A	A	B	A	B	A	A	A	A	B	A	A	A	A	B	B	A	B	B	B	B	A	A	B	A	B	C	B	A	A	A	A	B	A	A	A	B
276	2A	48967	IWB48967	Kukri_rep_c104256_475	49.4	A	B	B	A	A	A	B	A	A	B	A	B	A	A	A	A	B	A	A	A	A	B	B	A	B	B	B	B	A	A	B	A	B	B	B	A	A	A	A	B	A	A	A	B
277	2A	79321	IWA5378	wsnp_Ex_rep_c67264_65795361	50.3	A	B	B	A	A	A	B	A	A	B	A	B	A	A	A	A	B	A	C	A	A	B	B	A	B	B	B	B	A	A	B	A	B	B	B	A	A	A	A	B	A	A	A	B
278	2A	27083	IWB27083	Excalibur_c4978_605	52	A	B	B	A	A	A	B	A	C	B	A	B	A	A	A	A	B	A	C	A	A	B	B	A	B	B	B	B	A	A	B	A	B	B	B	A	A	A	A	B	A	A	A	B
279	2A	41389	IWB41389	Kukri_c15489_626	52.5	A	B	B	A	A	A	A	A	C	B	A	B	A	A	A	A	B	A	C	A	A	B	B	A	B	B	B	B	A	A	B	A	B	B	B	A	A	A	A	B	A	A	A	B
280	2A	68111	IWB68111	Tdurum_contig13957_866	55.5	A	B	B	A	A	A	A	A	A	B	A	B	B	C	A	A	B	A	B	A	A	B	B	A	B	B	B	B	A	C	B	A	B	B	B	A	A	A	A	B	A	A	A	B
281	2A	13965	IWB13965	CAP7_c2791_231	56.1	A	B	B	A	A	A	A	A	A	B	A	B	B	A	A	A	B	A	C	A	A	B	B	A	B	B	B	B	A	A	B	A	B	C	B	A	A	A	A	B	A	A	A	B
282	2A	72123	IWB72123	Tdurum_contig50824_58	56.4	A	B	B	A	A	A	A	A	A	B	A	B	B	A	A	A	B	A	C	A	A	B	B	A	B	B	B	B	A	A	B	A	B	B	B	A	A	A	A	B	A	A	A	B
283	2A	7015	IWB7015	BS00022301_51	57.5	A	B	B	A	A	B	A	A	A	B	A	A	B	A	A	A	B	A	B	A	A	B	B	A	B	B	B	B	A	A	B	A	B	B	B	A	A	A	A	B	A	A	A	B
284	2A	46634	IWB46634	Kukri_c57078_153	58.6	A	B	B	A	A	B	A	A	A	B	A	A	B	A	A	A	B	A	B	A	A	B	B	A	B	B	B	B	A	A	B	A	B	B	B	A	A	A	A	B	A	A	A	B
285	2A	71282	IWB71282	Tdurum_contig42540_843	62.5	A	C	B	A	A	B	A	A	A	B	A	A	B	C	A	A	B	A	B	A	A	B	B	A	B	B	B	B	B	A	B	A	B	B	B	A	A	A	A	B	A	A	A	B
286	2A	1087	IWB1087	BobWhite_c17739_82	63.4	A	B	B	A	A	B	A	A	A	B	A	A	B	A	A	A	B	A	B	A	A	B	B	A	B	B	B	B	B	A	B	A	B	B	B	A	A	A	A	B	A	A	A	B
287	2A	72154	IWB72154	Tdurum_contig5114_319	70.9	A	B	B	C	A	A	A	A	B	B	A	A	B	B	A	A	B	A	B	A	A	B	A	A	B	B	B	A	B	A	A	A	B	B	B	A	A	B	A	A	B	A	A	B
288	2A	64479	IWB64479	RFL_Contig3780_644	74.7	A	B	B	A	A	C	A	A	B	B	A	B	B	A	A	A	B	A	A	A	A	B	B	A	B	A	B	A	B	A	A	A	B	B	B	A	B	B	A	A	B	A	A	A
289	2A	20877	IWB20877	Ex_c5280_1429	75	A	B	B	A	A	C	A	A	B	B	A	B	B	A	A	A	B	A	A	A	A	B	B	A	A	A	B	A	B	A	A	A	B	B	B	A	B	B	A	A	B	A	A	A
290	2A	11614	IWB11614	BS00089497_51	83.8	A	A	B	C	A	B	A	A	B	B	A	B	B	A	A	B	B	A	A	A	A	B	B	A	B	B	B	A	B	A	A	A	B	B	B	A	A	B	A	A	A	A	A	A
291	2A	5745	IWB5745	BS00000297_51	84.9	A	A	B	C	A	B	A	A	B	B	A	B	B	A	A	B	B	A	A	A	A	B	B	A	B	B	B	A	B	A	A	A	B	B	B	A	A	B	A	A	A	A	A	A
292	2A	64643	IWB64643	RFL_Contig4324_1348	87.1	A	A	B	C	A	B	A	A	B	B	A	A	B	A	A	B	B	A	A	A	A	B	B	A	B	B	B	A	B	A	A	A	B	B	B	A	A	B	A	A	A	A	A	A
293	2A	79680	IWA5878	wsnp_JD_c169_270144	88.2	B	A	B	C	A	B	A	A	B	B	A	A	B	A	A	B	B	A	A	A	A	B	B	A	B	B	B	A	B	A	A	A	B	B	B	A	A	B	A	A	A	A	B	A
294	2A	28642	IWB28642	Excalibur_c7282_482	88.5	B	A	B	C	A	B	A	A	B	B	A	A	B	A	A	B	B	A	A	A	A	B	B	A	B	B	B	A	B	A	A	A	A	B	B	A	A	B	A	A	A	A	B	A
295	2A	60477	IWB60477	RAC875_c77565_298	89	A	A	B	C	A	B	A	A	B	B	A	A	A	A	A	B	B	A	A	A	A	B	B	A	B	B	B	A	B	A	A	A	A	B	B	A	A	B	A	A	A	A	B	A
296	2A	8088	IWB8088	BS00037160_51	89.3	A	A	B	C	A	B	A	A	B	B	A	A	A	A	A	B	B	A	A	A	A	B	B	A	B	B	B	A	B	A	A	A	A	C	B	A	A	B	A	A	A	A	B	A
297	2A	67229	IWB67229	Tdurum_contig11678_289	90.2	A	A	A	C	A	B	A	A	B	B	A	A	A	A	A	B	B	A	A	A	A	B	B	A	B	B	B	A	B	A	A	A	A	C	B	A	A	B	A	A	A	A	B	A
298	2A	81109	IWA7876	wsnp_Ra_c3378_6318431	90.4	A	A	A	C	A	B	A	A	B	B	A	A	A	A	A	B	B	A	A	A	A	B	B	A	B	B	B	A	B	A	A	A	A	B	B	A	A	B	A	A	A	A	B	A
299	2A	7395	IWB7395	BS00023048_51	104.1	C	A	A	A	B	B	A	A	A	B	A	B	A	A	A	B	A	A	B	B	B	B	B	A	A	B	A	A	B	A	A	B	A	C	B	A	A	B	C	B	A	B	B	A
300	2A	79067	IWA5066	wsnp_Ex_rep_c102390_87572532	104.3	C	A	A	A	B	B	A	A	A	B	A	B	A	A	A	B	A	A	B	B	B	B	B	A	A	B	A	A	B	A	A	B	A	B	B	A	A	B	B	B	A	B	B	A
301	2A	53046	IWB53046	RAC875_c104160_61	105.5	C	A	C	A	B	B	B	A	A	B	A	B	A	A	A	B	A	A	B	B	B	B	B	A	A	B	A	A	B	A	A	B	A	B	B	A	A	B	B	B	A	B	B	A
302	2A	73879	IWB73879	Tdurum_contig93508_295	108.3	C	A	C	A	B	B	B	A	A	B	A	B	A	B	A	B	A	A	B	B	B	B	B	A	A	B	A	A	B	A	A	B	A	B	B	B	A	B	A	B	B	B	B	A
303	2A	72722	IWB72722	Tdurum_contig60298_219	108.6	C	A	C	A	B	B	B	A	A	B	A	B	A	B	A	B	A	A	B	B	B	B	B	A	A	B	A	A	B	A	A	B	A	B	B	B	A	B	A	B	B	B	B	A
304	2A	25799	IWB25799	Excalibur_c3727_1773	109.7	C	A	C	A	B	B	B	A	A	B	A	B	A	B	A	B	A	A	B	B	B	B	B	A	A	B	A	A	B	A	A	B	A	B	B	B	A	B	A	B	B	B	B	A
305	2A	65315	IWB65315	RFL_Contig927_1591	110.8	C	A	C	A	B	B	B	A	A	B	A	B	A	B	A	B	A	A	B	B	B	A	B	A	A	B	A	A	B	A	A	B	A	B	B	B	A	B	A	B	B	B	B	A
306	2A	5740	IWB5740	BS00000209_51	111.1	C	A	C	A	B	B	B	A	A	B	A	B	A	B	A	B	A	B	B	B	B	A	B	A	A	B	A	A	B	A	A	B	A	B	B	B	A	B	A	B	B	B	B	A
307	2A	8907	IWB8907	BS00062732_51	111.9	C	A	C	A	B	B	B	A	A	B	A	B	A	B	A	B	A	B	B	B	B	A	B	A	A	A	A	A	B	A	A	B	A	B	B	B	A	B	A	B	B	B	B	A
308	2A	58213	IWB58213	RAC875_c4609_1756	112.2	C	A	C	A	B	B	B	A	A	B	A	B	A	B	A	B	A	B	B	B	B	A	B	A	A	A	A	A	B	A	A	B	A	C	B	B	A	B	A	B	B	B	B	A
309	2A	3746	IWB3746	BobWhite_c5178_188	113.3	C	A	C	A	B	B	B	B	A	B	A	B	A	B	A	B	A	B	B	B	B	A	B	A	A	A	A	A	B	A	A	B	A	B	B	B	A	B	A	B	B	B	B	A
310	2A	3440	IWB3440	BobWhite_c4517_120	113.6	C	A	C	A	B	B	B	B	A	B	A	B	A	B	A	B	A	B	B	B	B	A	B	A	A	A	A	A	B	A	A	B	A	B	C	B	A	B	A	B	B	B	B	A
311	2A	836	IWB836	BobWhite_c15773_166	114.1	C	A	C	A	B	B	B	B	A	B	A	B	A	B	A	B	A	B	B	B	B	A	B	A	A	A	A	A	B	A	A	B	A	B	B	B	A	B	A	B	B	B	B	A
312	2A	35952	IWB35952	IACX4320	114.9	C	A	C	A	B	B	B	B	A	B	A	B	A	B	A	B	A	B	C	B	B	A	B	A	A	A	A	A	B	A	A	B	A	B	B	B	A	B	A	B	B	B	B	A
313	2A	61146	IWB61146	RAC875_c96033_191	115.2	C	A	A	A	B	B	B	B	A	B	A	B	A	B	A	B	A	B	B	B	B	A	B	A	A	A	A	A	B	A	A	B	A	B	B	B	A	B	A	B	B	B	B	A
314	2A	72339	IWB72339	Tdurum_contig54056_501	117.2	C	B	C	A	B	B	B	B	B	B	A	B	A	B	A	B	A	B	B	B	B	A	B	A	A	A	A	A	B	A	A	B	A	B	B	B	A	B	A	B	B	B	B	A
315	2A	26001	IWB26001	Excalibur_c39151_104	118.7	C	B	C	A	B	B	B	B	B	B	A	B	A	B	A	B	A	B	B	B	A	A	B	A	A	A	A	B	B	A	A	B	A	B	B	B	A	B	A	B	B	B	B	A
316	2A	9488	IWB9488	BS00065245_51	118.9	C	B	C	A	B	B	B	B	B	B	A	B	A	B	A	B	A	B	B	B	A	A	B	A	A	A	A	B	B	A	A	B	A	B	B	B	A	B	A	B	B	B	B	A
317	2A	73638	IWB73638	Tdurum_contig8350_350	120.6	C	B	A	A	B	B	B	B	B	B	A	B	A	B	A	B	A	B	B	A	A	A	B	A	A	A	A	B	B	A	A	B	A	C	B	B	A	B	B	B	B	B	B	A
318	2A	14668	IWB14668	CAP8_c3129_381	120.9	C	B	A	A	B	B	B	B	B	B	A	B	A	B	A	B	A	B	B	A	A	A	B	A	A	A	A	B	B	A	A	B	A	B	B	B	A	B	B	B	B	B	B	A
319	2A	32878	IWB32878	GENE-2324_85	121.2	C	B	A	B	B	B	B	B	B	B	A	B	A	B	A	B	A	B	B	A	A	A	B	A	A	A	A	B	B	A	A	B	A	B	B	B	A	B	B	B	B	B	B	C
320	2A	46343	IWB46343	Kukri_c53501_305	121.7	C	B	A	B	B	B	B	B	B	B	A	B	A	B	A	B	A	B	B	A	A	A	B	A	A	A	A	B	B	A	A	B	A	B	B	B	A	B	B	B	B	B	B	A
321	2A	32084	IWB32084	GENE-0762_808	124.3	A	B	C	A	B	B	B	B	B	B	B	B	A	B	A	B	A	B	B	A	A	A	B	A	A	A	A	B	B	A	A	B	A	B	B	B	B	B	B	B	B	B	B	B
322	2B	315	IWB315	BobWhite_c12144_216	0	A	B	B	B	A	B	A	B	B	A	B	A	B	A	B	B	A	C	B	A	B	A	B	A	B	A	A	B	B	C	C	A	B	A	A	B	B	A	B	A	A	A	A	B
323	2B	44633	IWB44633	Kukri_c3701_392	0.3	A	B	B	B	A	B	A	B	B	A	B	A	B	A	B	B	A	C	B	A	B	A	B	A	B	A	A	B	B	C	C	A	B	A	A	B	B	A	B	A	A	A	A	B
324	2B	8416	IWB8416	BS00046019_51	3.5	A	B	B	B	A	B	A	B	B	A	B	A	B	A	B	B	A	C	B	A	A	B	A	A	B	A	C	B	B	C	C	A	A	A	A	B	B	A	B	A	A	A	A	B
325	2B	50555	IWB50555	Kukri_rep_c97239_133	5.5	A	B	B	B	A	B	A	B	B	A	B	A	B	A	B	B	A	C	B	A	A	B	B	A	B	A	A	B	B	C	C	A	A	A	A	B	B	A	B	A	A	A	A	B
326	2B	30293	IWB30293	Excalibur_rep_c107769_116	6.1	A	B	B	B	A	B	A	B	B	A	B	A	B	A	B	B	A	C	B	A	A	B	B	A	B	A	A	B	B	C	C	A	A	A	A	B	B	A	B	A	A	A	A	B
327	2B	1326	IWB1326	BobWhite_c19945_341	8.6	A	B	A	B	A	B	A	B	B	B	B	A	B	A	B	B	A	C	B	B	A	B	B	A	B	A	A	B	B	A	C	A	A	A	A	B	B	A	B	A	B	A	A	B
328	2B	71519	IWB71519	Tdurum_contig44328_68	8.9	A	B	A	B	A	B	A	B	B	B	B	A	B	A	B	B	A	C	B	B	A	B	B	A	B	A	A	B	B	A	C	A	A	A	A	B	B	A	B	A	B	A	A	B
329	2B	81154	IWA7936	wsnp_Ra_c4321_7860456	13.7	A	B	A	B	B	B	A	B	B	B	B	A	B	A	B	B	A	C	B	B	A	B	B	A	B	A	A	B	B	A	B	A	A	B	A	B	B	A	B	A	A	A	A	B
330	2B	39756	IWB39756	Ku_c63748_1264	14	A	B	A	B	B	B	A	B	B	B	B	A	B	A	B	B	A	C	B	B	A	A	B	A	B	A	A	B	B	A	B	A	A	B	A	B	B	A	B	A	A	A	A	B
331	2B	43883	IWB43883	Kukri_c3067_398	14.3	A	B	A	B	B	B	A	B	B	B	B	A	C	A	B	B	A	C	B	A	A	A	B	A	B	A	A	B	B	A	B	A	A	B	A	B	B	A	B	A	A	A	A	B
332	2B	76925	IWA2274	wsnp_Ex_c1792_3381384	18.5	A	B	A	B	B	B	A	B	B	B	B	A	C	A	B	B	A	C	B	A	A	B	B	A	B	A	A	B	B	A	B	A	A	B	A	B	B	A	B	A	A	A	A	B
333	2B		wmc154		22.4	A	B	A	B	B	A	A	A	B	B	B	A	A	A	B	B	A	C	B	A	A	B	B	A	B	A	A	B	B	A	B	A	A	B	A	B	B	A	B	A	A	A	A	B
334	2B	11823	IWB11823	BS00093755_51	29.9	A	B	A	A	B	A	A	A	A	A	B	A	A	A	A	B	A	C	B	A	A	B	B	A	B	A	A	A	B	A	B	A	A	B	A	B	B	A	B	A	A	A	A	B
335	2B	57906	IWB57906	RAC875_c4314_993	34.7	A	B	A	A	B	A	A	A	A	A	B	A	A	A	A	B	B	C	B	A	A	B	B	A	C	A	A	A	B	A	B	A	B	B	A	B	B	B	B	A	A	A	B	B
336	2B	46469	IWB46469	Kukri_c5497_312	38	B	A	A	A	B	A	A	A	A	A	B	A	A	A	A	B	C	C	A	A	A	B	B	A	C	A	A	B	A	A	B	A	B	B	A	B	B	B	B	A	A	A	B	B
337	2B	61862	IWB61862	RAC875_rep_c109207_706	38.9	B	A	A	A	B	A	A	A	A	A	B	A	A	A	A	B	A	C	A	A	A	B	B	A	C	A	A	B	A	A	C	A	C	B	A	C	B	B	B	A	A	A	B	B
338	2B	54881	IWB54881	RAC875_c19690_358	39.2	B	A	A	A	B	A	A	A	A	A	B	A	A	A	A	B	C	C	A	A	A	B	B	A	C	A	A	B	A	A	B	A	B	B	A	B	B	B	B	A	A	A	B	B
339	2B	28342	IWB28342	Excalibur_c6502_397	39.5	B	A	A	A	B	A	A	A	A	A	B	A	A	A	A	B	C	C	A	A	A	B	B	A	C	A	A	B	A	A	B	A	B	B	A	B	B	B	B	A	A	A	B	B
340	2B	7072	IWB7072	BS00022422_51	41.6	B	A	A	A	B	C	A	A	A	A	B	A	A	A	A	B	C	C	A	A	A	B	B	A	C	A	A	B	A	A	B	A	B	B	A	B	B	B	B	A	A	A	B	B
341	2B	36919	IWB36919	JD_c11869_1297	41.9	B	A	A	A	B	A	A	A	A	A	B	A	A	A	A	B	C	C	A	A	A	B	B	A	C	A	A	B	A	A	B	A	B	B	A	B	B	B	B	A	A	A	B	B
342	2B	10024	IWB10024	BS00067337_51	42.2	B	A	A	A	B	A	A	A	A	A	B	A	A	A	A	B	C	C	A	A	A	B	B	A	C	A	A	B	A	A	B	A	B	B	A	B	B	B	B	A	A	A	B	B
343	2B	2338	IWB2338	BobWhite_c30112_275	42.5	B	A	A	A	B	A	A	A	A	A	B	A	A	A	A	B	C	C	A	A	A	B	B	A	C	A	A	C	A	A	B	A	B	B	A	B	B	B	B	A	A	A	B	B
344	2B	45048	IWB45048	Kukri_c40637_223	42.8	B	A	A	A	B	A	A	A	A	A	B	A	A	A	B	B	C	C	A	A	A	B	B	A	C	A	A	B	A	A	B	A	B	B	A	B	B	B	B	A	A	A	B	B
345	2B	6822	IWB6822	BS00021959_51	43.3	B	A	A	A	B	A	A	A	A	A	B	A	A	A	B	B	C	C	A	A	A	B	B	A	C	A	A	B	A	A	B	A	B	B	A	B	B	B	B	A	A	A	B	B
346	2B	37019	IWB37019	JD_c14855_506	43.6	B	A	A	A	B	A	A	A	A	A	B	A	A	A	B	B	C	C	A	A	A	B	B	A	C	A	A	B	A	A	B	A	B	B	A	B	B	B	B	A	A	A	B	B
347	2B	36153	IWB36153	IACX6411	43.9	B	A	A	A	B	A	A	A	A	A	B	A	A	A	B	B	B	C	A	A	A	B	B	A	C	A	A	B	A	A	B	A	B	B	A	B	B	B	B	A	A	A	B	B
348	2B	12063	IWB12063	BS00099361_51	44.2	B	A	A	A	B	A	A	A	A	A	B	A	A	A	B	B	B	C	A	A	A	B	A	A	C	A	A	B	A	A	B	A	B	B	A	B	B	B	B	A	A	A	B	B
349	2B	44610	IWB44610	Kukri_c36783_91	44.4	B	A	A	A	B	A	A	A	A	A	B	A	A	A	B	B	B	C	A	A	A	B	A	A	C	A	A	B	A	A	B	A	B	B	A	B	B	B	B	A	A	A	B	B
350	2B	32069	IWB32069	GENE-0724_612	45	B	A	A	A	B	A	A	A	A	A	B	A	A	A	B	B	B	C	A	A	A	B	A	A	A	A	A	B	A	A	B	A	B	B	A	B	B	B	B	A	A	A	B	B
351	2B	77663	IWA3277	wsnp_Ex_c3044_5620102	45.3	B	A	A	A	B	A	A	A	A	A	B	A	A	A	B	B	B	C	A	A	A	B	A	A	A	A	A	B	A	A	B	A	B	B	A	B	B	B	B	A	A	A	B	B
352	2B	45219	IWB45219	Kukri_c42244_809	45.8	B	A	A	A	B	A	A	A	A	A	B	A	A	A	B	B	B	C	A	A	A	B	A	A	A	A	A	B	A	A	B	A	B	C	A	B	B	B	B	A	A	A	B	B
353	2B	13596	IWB13596	CAP12_rep_c4483_301	46.4	B	A	A	A	B	A	A	A	A	A	B	A	A	A	B	B	B	C	A	B	A	B	A	A	A	A	A	B	A	A	B	A	B	C	A	B	B	B	B	A	A	A	B	B
354	2B	44901	IWB44901	Kukri_c39230_362	46.7	B	A	A	A	B	A	A	A	A	A	B	A	A	A	B	B	B	C	A	B	A	B	A	A	A	A	A	B	A	A	B	A	B	B	A	B	B	B	B	A	A	A	B	B
355	2B	48313	IWB48313	Kukri_c9281_71	47	B	A	A	A	B	A	A	A	A	A	B	A	A	A	B	B	B	C	A	B	A	B	A	A	A	A	A	B	A	A	B	A	B	C	A	B	B	B	B	A	A	A	B	B
356	2B	6017	IWB6017	BS00007901_51	47.5	B	A	A	A	B	A	A	A	A	A	A	A	A	A	B	B	B	C	A	B	A	B	A	A	A	A	A	B	A	A	B	A	B	B	A	B	B	B	B	A	A	A	B	B
357	2B	5274	IWB5274	BobWhite_rep_c61602_139	48.7	B	A	A	A	B	A	A	A	A	A	A	A	A	A	B	B	B	C	A	B	A	B	A	A	A	A	A	B	A	A	B	A	A	B	A	B	B	B	B	A	A	A	B	B
358	2B	19067	IWB19067	D_GDEEGVY02G3Q15_336	50.1	B	A	A	A	B	A	A	A	A	A	A	A	A	A	B	A	B	C	A	B	A	B	A	A	A	A	A	B	A	A	B	A	A	B	A	B	B	B	B	A	A	A	B	B
359	2B	40605	IWB40605	Kukri_c11488_874	51	B	A	A	A	B	A	A	A	A	A	A	A	A	A	B	A	B	C	A	B	A	B	A	A	A	A	A	B	A	A	B	A	A	B	A	B	B	B	B	A	A	A	B	B
360	2B	685	IWB685	BobWhite_c14686_86	52.7	B	A	A	B	B	A	A	A	A	A	A	A	A	A	B	A	B	C	A	B	A	B	A	A	A	A	A	B	A	A	B	A	A	B	A	B	B	B	B	A	A	A	B	B
361	2B	72999	IWB72999	Tdurum_contig64751_120	52.9	B	A	A	B	B	A	A	A	A	A	A	A	A	A	B	A	B	C	A	B	A	B	A	A	A	A	A	B	A	A	B	A	A	B	A	B	B	B	B	A	A	A	B	B
362	2B	78067	IWA3786	wsnp_Ex_c41558_48356869	54.6	B	A	A	B	B	A	A	A	A	A	A	A	A	A	B	A	B	C	A	B	A	B	A	A	A	A	A	B	A	A	B	A	A	B	A	B	B	A	B	A	A	A	B	B
363	2B		gwm388		59.4	C	C	A	B	B	A	A	A	A	A	A	A	A	B	B	A	B	C	A	B	A	B	A	A	A	A	A	B	A	A	B	A	A	B	A	B	B	A	B	A	A	B	B	B
364	2B	69151	IWB69151	Tdurum_contig25629_415	60.8	B	A	A	B	B	A	A	A	A	A	A	A	A	B	B	A	B	C	A	B	A	B	A	A	A	A	A	B	A	A	B	A	A	B	A	B	B	A	B	A	A	B	B	B
365	2B	11849	IWB11849	BS00093993_51	61.1	B	A	A	B	B	A	A	A	A	A	A	A	A	A	B	A	B	C	A	B	A	B	A	A	A	A	A	B	A	A	B	A	A	B	A	B	B	A	B	A	A	B	B	B
366	2B	20922	IWB20922	Ex_c55735_1012	61.7	B	A	A	B	B	A	A	A	A	A	A	A	A	A	A	A	B	C	A	B	A	B	A	A	A	A	A	B	A	A	B	A	A	B	A	B	B	A	B	A	A	B	B	B
367	2B	55736	IWB55736	RAC875_c25035_958	62.8	B	A	A	B	B	A	A	A	A	A	A	A	A	A	A	A	B	C	A	B	A	B	A	A	A	A	A	B	A	A	B	A	A	B	A	B	B	A	B	A	A	B	B	B
368	2B	39865	IWB39865	Ku_c6970_2174	63.1	B	A	A	B	B	A	A	A	A	A	A	A	A	A	A	A	B	C	A	B	A	B	A	A	A	A	A	B	A	A	B	A	A	B	A	B	B	A	B	A	A	B	B	B
369	2B	43828	IWB43828	Kukri_c3024_1163	63.7	B	A	A	B	B	A	A	A	A	A	A	A	A	A	A	A	B	C	A	B	A	B	A	A	A	A	A	B	A	A	B	A	A	B	A	B	B	A	B	A	A	B	B	B
370	2B	45932	IWB45932	Kukri_c49007_501	63.9	B	A	A	B	B	A	A	A	A	A	A	A	A	A	A	A	B	C	A	B	A	B	A	A	A	A	A	B	A	A	B	A	A	B	A	B	B	A	B	A	A	B	B	B
371	2B	30332	IWB30332	Excalibur_rep_c108225_302	64.2	B	A	A	B	B	A	A	A	A	A	A	A	A	A	A	A	B	C	A	B	A	B	A	A	A	A	A	B	A	A	B	A	A	B	A	B	B	A	B	A	A	B	B	B
372	2B	72542	IWB72542	Tdurum_contig5691_596	64.5	B	A	A	B	B	A	A	A	A	A	A	A	A	A	A	A	B	C	A	B	A	B	A	A	A	A	A	B	A	A	B	A	A	B	A	B	B	A	B	A	A	B	B	B
373	2B	81090	IWA7850	wsnp_Ra_c31353_40494768	64.8	B	A	A	B	B	A	A	A	A	A	A	A	A	A	A	A	B	C	A	B	A	B	A	A	A	A	A	B	A	A	B	A	A	B	A	B	B	A	B	A	A	B	B	B
374	2B	28479	IWB28479	Excalibur_c6769_758	65.1	B	A	A	B	B	A	A	A	A	A	A	A	A	A	A	A	B	C	A	B	A	B	A	A	A	A	A	B	A	A	B	A	A	B	A	B	B	A	B	A	A	B	B	B
375	2B	23831	IWB23831	Excalibur_c22637_235	65.3	B	A	A	B	B	A	A	A	A	A	A	A	A	A	A	A	B	C	A	B	A	B	A	A	A	A	A	B	A	A	B	A	A	B	A	B	B	A	B	A	A	B	B	B
376	2B	4443	IWB4443	BobWhite_c8253_397	65.6	B	A	A	B	B	A	A	A	A	A	A	A	A	A	A	A	B	C	A	B	A	B	A	A	A	A	A	B	A	A	B	A	A	B	A	B	B	A	B	A	A	B	B	B
377	2B	9873	IWB9873	BS00066719_51	65.9	B	A	A	B	B	A	A	A	A	A	A	A	A	C	A	A	A	C	A	B	A	B	A	A	A	A	A	B	A	A	B	A	A	B	A	B	B	A	B	A	A	B	B	B
378	2B	22762	IWB22762	Excalibur_c1625_1215	67.3	B	A	A	B	B	A	A	A	A	A	A	A	A	C	A	A	A	C	A	B	A	B	A	A	A	A	A	B	A	A	B	A	A	B	A	B	B	A	B	A	A	B	B	B
379	2B	77358	IWA2873	wsnp_Ex_c24135_33382521	67.6	B	A	A	B	B	A	A	A	A	A	A	A	A	C	A	A	A	C	A	B	A	B	A	A	A	A	A	B	A	A	B	A	A	B	A	B	B	A	B	A	B	B	B	B
380	2B	68692	IWB68692	Tdurum_contig17826_338	69	B	A	A	B	B	A	A	A	A	A	A	A	A	C	A	B	A	C	A	B	A	B	A	A	A	A	A	B	A	A	B	A	A	B	A	B	B	A	B	A	B	B	B	B
381	2B	25281	IWB25281	Excalibur_c32980_169	69.9	B	A	A	B	B	A	A	A	A	A	A	A	A	C	A	B	A	C	A	B	A	B	A	A	A	A	A	B	A	A	B	A	A	B	A	B	B	A	B	A	B	B	B	B
382	2B	46631	IWB46631	Kukri_c57014_168	72.6	B	A	A	B	B	A	A	A	A	A	A	A	A	C	A	B	C	C	A	B	A	B	C	A	A	A	A	B	A	A	B	A	A	B	A	A	B	A	A	A	B	B	B	B
383	2B	71742	IWB71742	Tdurum_contig47_185	73.1	B	A	A	B	B	A	A	A	A	A	A	A	A	C	A	B	C	C	A	B	A	B	C	A	A	A	A	B	A	A	B	A	A	B	A	A	B	A	A	A	B	B	B	B
384	2B	11280	IWB11280	BS00082967_51	81.7	B	A	A	A	B	A	A	A	A	A	A	A	A	C	A	B	C	C	A	B	A	B	C	A	B	A	B	A	A	B	B	A	B	B	A	A	B	B	A	A	B	B	B	A
385	2B	11174	IWB11174	BS00081189_51	82.3	B	A	A	A	B	A	A	A	A	A	A	A	A	A	A	B	C	C	A	B	A	B	A	A	B	A	B	A	A	B	B	A	B	B	A	A	B	B	A	A	B	B	B	A
386	2B	11366	IWB11366	BS00084417_51	87.9	A	A	A	A	B	A	A	A	A	A	A	A	A	C	A	B	C	C	A	B	A	B	A	A	B	A	B	A	A	B	B	A	B	B	A	A	B	B	B	A	B	B	A	A
387	2B	36286	IWB36286	IACX8298	88.2	A	A	A	A	B	A	A	A	A	A	A	A	A	C	A	B	C	C	A	B	A	B	A	A	B	A	B	A	A	B	B	A	B	B	A	A	B	B	B	A	B	B	A	A
388	2B	34773	IWB34773	IAAV3800	94.4	A	A	A	A	B	A	A	B	A	A	A	A	A	B	B	B	A	C	A	A	A	A	A	B	B	A	B	A	A	B	B	A	B	B	A	A	B	B	B	A	B	B	A	A
389	2B	47255	IWB47255	Kukri_c657_1607	95	A	A	A	A	B	A	A	B	A	A	A	A	A	B	B	B	C	C	A	A	A	A	A	B	B	A	B	A	A	B	B	A	B	B	A	A	B	B	B	A	B	B	A	A
390	2B	27661	IWB27661	Excalibur_c56550_71	96.1	A	A	A	A	B	A	A	B	A	A	A	A	A	B	B	B	C	C	A	A	A	A	A	B	B	A	B	A	A	B	B	B	B	B	A	A	B	B	B	A	B	B	A	A
391	2B	63604	IWB63604	RFL_Contig1307_382	96.7	A	A	A	A	B	A	A	B	A	A	A	A	A	B	B	B	C	C	A	A	A	A	A	B	B	A	B	A	A	B	B	B	B	C	A	A	B	B	B	A	A	B	A	A
392	2B	1795	IWB1795	BobWhite_c24069_152	99.3	A	A	A	A	B	A	A	B	A	A	A	A	A	B	B	B	C	C	A	A	A	A	A	B	B	A	B	A	A	B	B	B	B	B	A	A	B	B	B	A	A	B	A	A
393	2B	29325	IWB29325	Excalibur_c910_946	99.6	A	A	A	A	B	A	A	B	A	A	A	A	A	B	B	B	C	C	A	A	A	A	A	B	B	A	B	A	A	B	B	B	B	B	A	A	B	B	B	A	A	B	A	A
394	2B	4319	IWB4319	BobWhite_c7274_333	99.9	A	A	A	A	B	A	A	B	A	A	A	A	A	B	B	B	C	C	A	A	A	A	A	B	B	A	B	A	A	B	B	B	B	B	A	A	B	B	B	A	A	B	A	A
395	2B	429	IWB429	BobWhite_c12911_788	100.1	A	A	A	A	B	A	A	B	A	A	A	A	A	B	B	B	C	C	A	A	A	A	A	B	B	A	B	A	A	B	B	B	B	B	A	A	B	B	B	A	A	B	A	A
396	2B	7580	IWB7580	BS00025538_51	101.3	A	A	A	A	B	A	A	B	A	A	B	A	A	B	B	B	A	C	A	A	A	A	A	B	B	A	B	A	A	B	B	B	B	B	A	A	B	B	B	A	A	B	A	A
397	2B	28735	IWB28735	Excalibur_c74925_338	108.8	A	A	A	A	B	A	A	B	A	A	B	A	A	B	B	C	A	C	B	A	A	A	A	B	B	A	B	A	C	B	B	B	A	C	A	A	B	B	B	A	A	B	A	A
398	2B	13375	IWB13375	CAP12_c3549_159	109	A	A	A	A	B	A	A	B	A	A	B	A	A	B	B	B	A	C	B	A	A	A	A	B	B	A	B	A	A	B	B	B	A	C	A	A	B	B	B	A	A	B	A	C
399	2D	9640	IWB9640	BS00065823_51	0	A	B	B	B	A	B	B	B	B	A	A	A	A	B	A	A	A	A	A	B	B	A	A	B	A	A	B	A	B	B	B	A	A	A	B	A	A	B	A	A	A	A	A	A
400	2D		barc124a		0.8	A	B	B	B	A	B	B	B	B	A	A	A	A	B	A	A	A	A	A	B	B	A	A	B	A	A	B	A	B	B	B	A	A	A	B	A	A	B	A	A	A	A	B	A
401	2D		gwm210		2.8	A	B	B	B	A	B	B	B	B	A	A	A	A	B	A	A	A	A	A	B	B	A	A	B	A	A	B	A	B	B	A	A	A	A	B	A	A	B	A	B	A	A	B	A
402	2D		Xrwgs46		4.2	A	B	B	B	A	B	B	B	B	A	A	A	A	A	A	A	A	A	A	B	B	A	A	B	A	A	B	A	B	B	A	A	A	A	B	A	B	B	A	B	A	A	B	A
403	2D	15798	IWB15798	D_contig15948_318	4.5	A	B	B	B	A	B	B	B	B	A	A	C	A	A	A	A	A	C	A	B	B	A	A	B	A	A	B	A	B	B	A	A	A	A	B	B	B	B	A	B	A	A	B	A
404	2D	65062	IWB65062	RFL_Contig5625_912	4.8	A	B	B	B	A	B	B	B	B	A	A	C	A	A	C	A	A	C	A	B	B	A	A	B	A	A	B	A	B	B	A	A	A	A	B	B	B	B	A	B	A	A	B	A
405	2D		barc95		6.5	A	B	B	B	A	B	B	B	B	A	A	A	A	A	A	B	A	A	B	B	B	A	A	B	C	A	B	A	B	B	A	A	A	A	B	B	A	B	A	B	A	A	B	A
406	2D		cfd36		7.6	A	B	B	B	A	B	B	B	B	A	A	C	A	A	C	B	A	A	B	B	B	A	B	B	A	A	B	A	B	C	A	A	A	A	B	B	A	B	A	B	A	A	B	A
407	2D		gwm455		9.9	A	B	B	B	A	B	B	B	B	A	A	C	A	A	C	B	A	A	B	B	B	A	B	B	A	A	B	A	B	B	A	A	A	A	B	B	A	B	A	B	A	A	B	A
408	2D	11455	IWB11455	BS00086387_51	13.1	B	B	B	B	A	B	B	B	B	A	A	C	A	A	A	B	A	A	B	B	B	A	B	B	A	B	B	A	B	B	A	B	A	A	B	B	A	B	A	B	A	A	B	A
409	2D		wmc25a		14	B	B	B	B	A	B	B	B	B	A	A	A	A	A	A	B	A	A	B	B	B	A	B	B	A	B	B	A	B	B	A	B	A	A	B	B	A	B	A	B	A	A	B	A
410	2D		gwm261		15.7	B	B	B	B	A	B	B	B	B	A	B	C	A	A	A	B	A	A	B	B	B	A	B	B	A	B	C	B	B	B	A	B	A	A	B	B	A	B	A	B	A	A	B	A
411	2D	18440	IWB18440	D_GBF1XID02GZJU7_294	15.9	B	B	B	B	A	B	B	B	B	A	B	C	A	A	A	B	A	A	B	B	B	A	B	C	A	B	B	B	B	B	A	B	A	A	B	B	A	B	A	B	A	A	B	A
412	2D		wmc112		17.1	B	B	B	B	A	B	A	A	B	A	B	A	A	B	A	B	A	A	B	B	B	A	B	B	A	B	B	B	B	B	A	B	A	A	B	B	A	B	A	B	A	A	B	A
413	2D	17749	IWB17749	D_GA8KES401CIV9Z_240	19.6	B	B	A	B	A	B	A	A	B	A	B	C	A	B	A	B	A	A	B	B	B	A	A	B	A	B	B	B	B	B	A	B	A	A	B	B	A	B	A	B	A	A	B	A
414	2D	66133	IWB66133	TA015657-0632	20.4	B	B	A	B	A	B	A	A	B	A	B	C	A	B	A	B	A	A	B	B	B	A	A	B	A	B	B	B	B	B	A	B	A	A	B	B	A	B	A	B	A	A	B	A
415	2D	7313	IWB7313	BS00022900_51	21.2	B	B	A	B	A	B	A	A	B	A	B	C	A	B	A	B	A	A	B	B	B	A	A	B	A	B	B	B	B	B	A	B	A	A	B	B	A	B	A	B	A	A	B	A
416	2D	16431	IWB16431	D_contig29912_428	22.6	B	B	A	B	A	B	A	A	B	A	B	A	A	A	A	B	A	A	B	B	B	B	A	B	A	B	B	B	B	B	A	B	A	A	B	B	A	B	A	B	A	A	B	A
417	2D	18745	IWB18745	D_GBUVHFX02JKG4A_54	23.4	B	B	A	B	A	B	A	A	B	A	B	A	A	A	A	B	A	C	B	B	B	B	A	B	A	B	B	B	B	B	A	B	A	C	B	B	A	B	A	B	A	A	B	A
418	2D	26920	IWB26920	Excalibur_c48050_258	31.4	B	B	A	B	A	B	B	A	B	A	A	B	A	A	A	B	A	B	B	A	A	B	A	B	A	B	B	B	B	A	A	A	A	C	B	B	A	B	A	B	B	A	B	A
419	2D	75654	IWA461	wsnp_BF428792D_Ta_1_3	35.5	B	B	A	B	A	B	B	A	B	B	A	B	A	A	A	B	A	B	B	A	A	B	A	B	A	B	B	B	B	A	A	A	A	A	B	B	A	B	A	B	B	A	A	A
420	2D		cfd43		37.1	B	B	A	B	A	B	B	A	B	B	A	B	A	A	A	B	A	B	B	A	A	B	A	B	A	B	B	B	A	B	A	B	A	B	B	B	A	B	A	B	B	A	A	A
421	2D	10652	IWB10652	BS00073229_51	39.7	B	B	A	B	A	B	B	A	B	B	A	B	A	A	A	B	A	B	B	A	A	B	A	B	A	B	B	B	B	A	A	A	A	A	B	B	A	B	A	B	B	A	A	A
422	2D	3556	IWB3556	BobWhite_c47086_539	40.2	B	B	A	B	A	A	B	A	B	B	A	B	A	A	A	B	A	B	B	A	A	B	A	B	A	B	B	B	B	A	A	A	A	A	B	B	A	B	A	B	B	A	A	A
423	2D	77018	IWA2406	wsnp_Ex_c19364_28303089	40.5	B	B	A	B	A	A	B	A	B	B	A	B	A	A	A	B	A	B	B	A	A	B	A	B	A	B	B	B	B	A	A	A	A	A	B	B	A	B	A	B	B	A	A	A
424	2D		gwm102		41.3	B	B	A	B	A	A	B	A	B	B	A	B	A	A	A	B	A	B	B	A	A	B	A	B	A	B	B	B	B	A	A	A	A	A	B	B	A	B	A	B	B	B	A	A
425	2D	32279	IWB32279	GENE-1172_825	42.7	B	B	A	B	A	A	B	A	B	B	A	B	A	A	B	B	A	B	B	A	A	B	A	B	A	B	B	B	B	A	A	A	A	C	B	B	A	B	A	B	B	B	A	A
426	2D	50095	IWB50095	Kukri_rep_c71152_906	43.2	B	B	A	B	A	A	B	A	B	B	A	B	A	A	B	B	A	B	B	A	A	B	A	B	A	B	B	B	B	A	A	A	A	C	B	B	A	B	A	B	B	B	A	A
427	2D	56624	IWB56624	RAC875_c31560_141	44.1	B	B	A	B	A	A	B	A	B	B	A	B	A	A	B	B	A	B	B	A	A	B	A	A	A	B	B	B	B	A	A	A	A	A	B	B	A	B	A	B	B	B	A	A
428	2D	50203	IWB50203	Kukri_rep_c72558_961	44.6	B	B	A	B	A	A	B	A	B	B	A	B	A	A	B	B	A	B	B	A	A	B	A	A	A	B	B	B	B	A	A	A	A	A	B	B	A	B	A	B	B	B	A	A
429	2D	11078	IWB11078	BS00079440_51	47.2	B	B	A	B	A	A	B	A	B	B	A	B	A	A	B	B	B	B	A	A	A	B	A	A	A	B	B	B	B	A	A	B	A	C	B	B	A	A	A	B	B	B	A	A
430	2D	16756	IWB16756	D_contig38408_245	48.3	B	B	A	B	A	A	B	A	B	B	A	B	A	A	B	A	B	B	A	A	A	B	A	A	A	B	B	B	B	A	A	B	A	A	B	B	A	A	A	B	B	B	A	A
431	2D	26673	IWB26673	Excalibur_c45516_323	49.5	B	B	A	B	A	A	B	A	B	B	A	B	A	A	B	A	B	B	A	A	A	B	A	A	A	B	B	C	B	A	A	C	A	A	B	C	A	A	A	B	B	B	A	A
432	2D	6737	IWB6737	BS00021718_51	49.7	B	B	A	B	A	A	B	C	B	B	A	B	A	A	B	A	B	B	A	A	A	B	A	C	A	B	B	C	B	A	A	B	A	A	B	B	A	A	A	B	B	B	A	A
433	2D	28708	IWB28708	Excalibur_c74304_438	50	B	B	A	B	A	A	B	A	B	B	A	B	A	A	B	A	B	B	A	A	A	B	A	A	A	B	B	B	B	A	A	B	A	C	B	B	A	A	A	B	B	B	A	A
434	2D	1095	IWB1095	BobWhite_c17783_72	51.4	B	B	A	B	A	A	B	A	B	B	A	B	A	A	B	A	B	B	A	A	A	B	A	A	A	B	C	B	B	A	A	B	A	A	B	B	A	A	A	B	A	B	A	B
435	2D	28572	IWB28572	Excalibur_c7110_90	54.7	B	B	A	B	A	A	B	A	B	B	A	B	A	A	B	A	B	A	A	A	A	B	B	A	A	B	B	B	B	A	A	B	A	C	B	B	A	A	A	B	A	B	A	B
436	2D	50180	IWB50180	Kukri_rep_c72254_186	56.1	B	B	A	B	A	A	B	A	B	B	A	B	A	A	B	A	B	A	A	A	A	B	B	A	A	B	B	B	B	A	A	B	A	A	B	B	A	A	A	B	A	B	A	B
437	2D	45860	IWB45860	Kukri_c48285_218	57.5	B	B	A	B	A	B	B	A	B	B	A	B	A	A	B	A	B	A	A	A	A	B	B	A	A	B	B	B	B	A	A	B	A	A	A	B	A	A	A	B	A	B	A	B
438	2D	81403	IWA8304	wsnp_RFL_Contig2179_1504740	60.3	B	B	A	B	A	B	B	A	B	B	A	B	A	A	B	B	B	A	A	A	A	B	B	A	A	B	B	B	B	A	A	B	A	A	A	B	B	A	A	B	A	B	A	B
439	2D	66042	IWB66042	TA006024-1567	61.4	B	B	A	B	A	B	B	A	B	B	A	B	A	A	B	B	B	A	A	A	A	A	B	A	A	B	B	B	B	A	A	B	C	A	A	B	B	A	A	B	A	B	A	B
440	2D	17721	IWB17721	D_GA8KES401BCXP1_137	62	A	B	A	B	A	B	B	A	B	B	A	B	A	A	B	B	B	A	A	A	A	A	B	A	A	B	B	B	B	A	C	B	A	A	A	B	B	A	A	B	A	B	A	B
441	2D	17019	IWB17019	D_contig66185_656	62.8	A	B	A	B	A	B	B	A	B	B	A	B	A	A	B	B	B	A	A	A	A	A	B	A	A	B	B	B	B	A	B	B	A	B	A	B	B	A	A	B	A	B	A	B
442	2D	19068	IWB19068	D_GDEEGVY02G3V8E_62	64.8	A	B	A	B	A	B	B	A	B	B	A	B	A	A	B	A	B	A	A	A	A	A	A	A	A	B	B	B	B	A	C	B	A	A	A	B	B	A	A	B	A	B	A	B
443	2D	17394	IWB17394	D_F5MV3MU01AO39J_375	65.1	A	B	A	B	A	B	B	A	B	B	A	B	A	A	B	A	B	A	A	A	A	A	A	A	A	B	B	B	B	A	C	B	A	A	A	B	B	A	A	B	A	B	A	B
444	2D	52874	IWB52874	RAC875_c10004_677	65.6	A	B	A	B	A	B	B	A	B	B	A	B	A	A	B	A	B	A	A	A	A	A	A	A	A	B	B	B	B	A	C	B	A	A	A	B	B	A	A	B	A	B	A	B
445	2D	34403	IWB34403	IAAV1553	65.9	A	B	A	B	A	B	B	A	B	B	A	B	A	A	B	A	B	A	A	A	A	A	A	A	A	B	B	B	B	A	C	B	A	A	A	B	B	A	A	B	A	B	A	B
446	2D	15509	IWB15509	D_contig09221_35	67	A	B	A	B	A	B	B	A	B	B	A	B	A	A	B	A	B	A	A	A	A	A	A	A	A	B	B	B	B	A	C	B	A	A	A	B	B	A	A	B	A	B	A	B
447	2D	17200	IWB17200	D_contig77675_71	67.2	A	B	A	B	A	B	B	A	B	B	A	B	A	A	B	A	B	A	A	A	A	A	A	A	A	B	B	B	B	A	C	B	A	A	A	B	B	A	A	B	A	A	A	B
448	2D	19020	IWB19020	D_GDEEGVY01DHB6B_126	68.4	A	B	A	B	A	B	B	A	B	B	A	B	A	A	B	A	B	A	A	B	A	A	A	A	A	B	B	B	B	A	C	B	A	A	A	B	B	A	A	B	A	A	A	B
449	2D	57869	IWB57869	RAC875_c42714_775	71.3	A	A	A	B	A	B	B	A	B	B	A	B	A	A	B	A	B	A	A	B	A	A	A	A	A	B	B	B	B	A	C	B	A	C	A	B	B	A	A	B	B	A	A	B
450	2D	15107	IWB15107	D_contig00087_156	72.7	A	A	A	B	A	B	B	A	B	B	A	B	A	A	B	A	B	A	A	B	A	A	A	A	A	B	B	B	B	A	C	B	A	A	A	B	B	A	A	B	B	A	A	B
451	2D	78851	IWA4789	wsnp_Ex_c8303_14001708	73.8	A	A	A	B	A	B	A	A	B	B	A	B	A	A	B	A	B	A	A	B	A	A	A	A	A	B	B	B	B	A	C	B	A	A	A	B	B	A	A	B	B	A	A	B
452	2D	16839	IWB16839	D_contig51538_130	80.9	A	A	A	B	A	B	A	A	B	B	A	B	A	A	B	A	B	A	A	B	A	A	A	A	A	B	B	B	B	A	C	B	B	A	A	B	A	B	A	B	B	A	A	B
453	2D	18804	IWB18804	D_GCE8AKX01C844Y_59	82	A	A	A	B	A	B	A	A	B	B	A	B	A	A	B	A	B	A	A	B	A	A	A	A	A	B	B	B	B	A	C	B	B	A	A	B	A	B	C	B	B	A	A	B
454	2D	54962	IWB54962	RAC875_c20187_1313	82.6	A	A	A	B	A	B	A	A	B	B	A	B	A	A	B	A	B	A	A	B	A	A	A	A	A	C	B	B	B	A	C	B	B	A	A	B	A	B	C	B	B	A	A	B
455	2D	5513	IWB5513	BobWhite_rep_c64934_62	86.1	A	A	B	A	A	B	B	A	B	B	A	B	A	A	B	A	B	A	A	B	A	A	A	A	A	B	B	B	B	A	B	B	B	A	A	B	A	B	A	B	B	A	A	B
456	2D	65461	IWB65461	TA001826-1418	86.9	A	A	B	A	A	B	B	A	B	B	A	B	A	A	B	A	B	A	A	B	A	A	A	A	B	B	B	B	B	A	B	B	B	A	A	B	A	B	A	B	B	A	A	B
457	2D	29432	IWB29432	Excalibur_c93588_271	93.2	A	A	B	A	A	A	B	A	B	B	A	B	A	A	B	A	B	A	A	B	A	A	A	A	B	B	B	B	B	A	C	B	B	B	A	B	A	B	A	B	B	B	A	B
458	2D	29964	IWB29964	Excalibur_rep_c103649_61	94.3	A	A	B	A	A	A	B	A	B	B	A	B	A	A	B	A	B	A	A	B	A	A	A	A	B	B	B	B	B	A	C	B	B	B	A	B	A	B	A	B	B	B	A	B
459	2D	40724	IWB40724	Kukri_c12032_508	95.7	A	A	B	A	A	A	A	A	B	B	A	B	A	A	B	A	B	A	A	C	A	A	A	A	B	B	B	B	B	A	A	B	B	B	A	B	A	B	A	B	B	B	A	B
460	2D	60317	IWB60317	RAC875_c7201_229	96.8	A	A	B	A	A	A	A	A	B	B	A	B	A	A	B	A	B	A	B	B	A	A	A	A	B	B	B	B	B	A	A	B	B	B	A	B	A	B	A	B	B	B	A	B
461	2D	56721	IWB56721	RAC875_c32340_462	98.4	A	A	B	A	B	A	A	A	B	B	A	B	A	A	B	A	B	A	B	B	A	A	A	A	B	B	B	B	B	A	A	B	B	B	A	B	A	B	A	B	A	B	A	B
462	2D	75576	IWA345	wsnp_BE517946D_Ta_1_2	98.7	A	A	B	A	B	A	A	A	B	B	A	B	A	A	B	A	B	A	B	B	A	A	A	A	B	B	B	B	B	A	A	B	B	B	A	B	A	B	A	B	A	B	A	B
463	2D	33200	IWB33200	GENE-3066_157	102.2	A	B	B	A	B	A	A	A	B	B	A	B	A	A	A	A	B	A	B	B	A	A	A	A	B	B	B	B	B	A	A	B	B	B	A	B	B	B	A	B	A	B	A	A
464	2D	44088	IWB44088	Kukri_c32355_1089	103.6	A	B	B	A	B	A	A	A	B	B	A	A	A	A	A	A	B	A	B	B	A	A	A	A	B	A	B	B	B	A	A	B	B	B	A	B	B	B	B	B	A	B	A	A
465	2D	75181	IWB75181	tplb0058k20_1741	103.8	A	B	B	A	B	A	A	A	B	B	A	A	A	A	A	A	B	A	B	B	A	A	A	A	B	A	B	B	B	A	A	B	B	B	A	B	B	B	B	B	A	B	A	A
466	2D	48051	IWB48051	Kukri_c85862_95	104.1	A	B	B	A	B	A	A	A	B	B	A	A	A	A	A	A	B	A	B	B	A	A	A	A	B	A	B	B	B	A	A	B	B	A	A	B	B	B	B	B	A	B	A	A
467	2D	30031	IWB30031	Excalibur_rep_c104465_155	105.2	A	B	B	A	B	A	A	A	B	B	A	A	A	A	A	A	B	A	B	A	A	A	A	A	B	A	B	B	B	A	A	B	B	A	A	B	B	B	B	B	A	B	A	A
468	2D	13626	IWB13626	CAP12_rep_c5547_123	107.4	A	B	A	A	B	A	A	A	B	B	A	A	A	A	A	A	B	A	B	A	A	A	A	A	B	A	B	B	B	A	A	B	B	A	A	B	B	B	B	B	A	B	A	A
469	2D	60568	IWB60568	RAC875_c79540_228	110	A	B	A	A	B	A	A	B	B	B	A	A	A	A	A	A	B	A	B	A	A	A	A	A	B	B	B	B	B	A	A	B	B	C	A	B	B	B	B	B	A	B	A	A
470	2D	37221	IWB37221	JD_c23444_59	113.5	A	B	A	A	B	A	A	B	B	B	A	A	A	A	A	A	B	A	B	A	A	A	A	A	B	B	B	B	B	A	A	B	B	C	A	B	B	B	B	B	A	B	A	A
471	2D	26227	IWB26227	Excalibur_c41445_304	115.2	A	B	A	A	B	A	A	A	B	B	A	A	A	A	A	A	B	A	B	A	A	A	A	A	B	B	B	B	B	A	B	B	B	A	A	B	B	B	B	B	A	A	A	A
472	2D	51195	IWB51195	Ra_c1597_2191	123.1	B	A	A	A	B	A	A	A	B	B	A	A	A	A	A	B	B	A	B	A	A	A	A	B	B	B	B	B	A	A	B	B	B	A	A	B	B	B	A	B	A	A	A	A
473	2D	61260	IWB61260	RAC875_c9897_638	124.8	B	A	A	A	B	A	A	A	B	B	A	A	C	A	A	B	B	A	B	A	A	A	A	B	B	B	B	B	A	A	B	B	B	C	A	B	B	B	A	B	A	A	A	A
474	2D	16677	IWB16677	D_contig36097_218	126.2	B	A	A	A	B	A	A	A	B	B	A	A	A	A	A	B	B	A	B	A	A	A	A	B	B	B	B	B	A	A	B	B	B	A	A	B	B	B	A	B	A	A	A	A
475	2D	17462	IWB17462	D_F5MV3MU01EJU6H_88	127.3	B	A	A	A	B	A	A	A	B	B	A	A	A	A	A	B	B	A	B	A	A	A	A	B	B	B	B	B	A	A	B	B	B	A	A	B	B	B	A	B	A	A	A	A
476	2D	12130	IWB12130	BS00100422_51	128.7	B	A	A	A	B	C	A	A	B	B	A	A	A	A	A	B	B	A	B	A	A	A	A	C	B	B	B	B	A	A	B	B	B	A	A	B	B	B	A	B	A	A	A	A
477	2D	15870	IWB15870	D_contig17468_415	135.7	B	A	A	A	B	C	A	A	B	B	A	A	A	A	A	B	B	A	B	A	A	A	A	B	B	B	B	B	A	A	B	B	B	B	A	B	B	B	A	B	A	A	A	B
478	2D	46283	IWB46283	Kukri_c5276_447	138.2	B	B	A	A	B	C	A	A	B	B	A	A	A	A	A	B	B	A	B	A	A	A	A	B	B	B	A	B	A	A	B	B	B	B	A	B	B	B	A	B	A	A	A	B
479	2D	78750	IWA4666	wsnp_Ex_c7366_12631101	139.6	B	B	A	A	B	C	A	A	B	B	A	A	B	A	A	B	B	A	B	A	A	A	A	B	B	B	A	B	A	A	B	B	B	B	A	B	B	B	A	B	A	A	A	B
480	2D	14819	IWB14819	CAP8_c5417_205	140.7	B	B	A	A	B	C	A	A	B	B	A	A	B	A	A	B	B	A	B	A	A	A	A	B	B	B	A	B	A	A	B	B	B	B	A	B	B	B	A	B	A	A	A	B
481	2D	11313	IWB11313	BS00083623_51	142.1	B	B	A	A	B	A	A	A	B	B	A	A	B	A	A	B	B	A	B	A	A	B	A	B	B	B	A	B	A	A	B	B	B	C	A	B	B	B	A	B	A	B	A	B
482	2D	26855	IWB26855	Excalibur_c4726_1231	142.4	B	B	A	A	B	A	A	A	B	B	A	A	B	A	A	B	B	A	B	A	A	B	A	B	B	B	A	B	A	A	B	B	B	B	A	B	B	B	A	B	A	B	A	B
483	3A	13817	IWB13817	CAP7_c1467_220	0	B	A	A	B	A	B	A	A	B	A	A	A	B	B	A	B	B	A	A	A	B	A	A	B	B	A	B	B	B	A	B	B	B	B	A	B	A	B	A	A	A	A	B	B
484	3A	54475	IWB54475	RAC875_c17453_896	3.6	B	A	A	B	A	B	A	A	B	A	A	A	B	B	A	B	A	A	A	A	B	A	A	B	B	A	A	B	A	A	B	B	B	B	B	B	B	B	A	A	B	A	B	B
485	3A	26921	IWB26921	Excalibur_c48057_110	4.7	B	A	A	B	A	B	A	B	B	A	A	A	B	B	A	B	A	A	A	A	B	A	A	C	C	A	A	B	A	A	B	B	B	B	B	B	B	B	A	A	B	A	B	B
486	3A	4617	IWB4617	BobWhite_c9511_388	5	B	A	A	B	C	B	A	B	B	A	A	A	B	B	A	B	A	A	A	A	B	A	A	B	B	A	A	B	A	A	B	B	B	B	B	B	B	B	A	A	B	A	B	B
487	3A	23206	IWB23206	Excalibur_c18826_452	5.6	B	A	A	B	A	B	A	B	B	A	A	A	B	B	A	B	A	A	A	A	B	A	A	B	B	A	A	B	A	A	B	B	B	B	B	B	B	B	A	A	B	A	B	B
488	3A	29214	IWB29214	Excalibur_c878_1249	6.1	B	A	A	B	A	B	A	B	B	A	A	A	B	B	A	B	A	A	A	A	B	A	A	B	B	A	A	B	A	A	B	B	B	B	B	B	B	A	A	A	B	A	B	B
489	3A	67382	IWB67382	Tdurum_contig12008_1001	6.7	B	A	A	B	A	B	B	B	B	A	A	A	B	B	A	B	A	A	A	A	B	A	A	C	B	A	A	B	A	A	B	B	B	B	B	B	B	A	A	A	B	A	B	B
490	3A	10398	IWB10398	BS00069355_51	7.2	B	A	A	B	A	B	B	B	B	A	A	A	B	B	A	B	A	A	A	A	B	A	A	B	B	A	A	B	A	A	B	B	B	B	B	B	B	A	A	A	B	A	B	B
491	3A	22161	IWB22161	Excalibur_c12875_1573	8.1	B	A	A	B	A	B	B	B	B	A	A	A	B	B	A	B	A	A	A	A	B	A	A	B	B	A	A	B	A	A	B	B	B	B	B	B	B	A	A	A	B	A	B	B
492	3A	27973	IWB27973	Excalibur_c60530_113	8.3	B	A	A	B	A	B	B	B	B	A	A	A	B	B	A	B	A	A	A	A	B	A	A	B	B	A	A	B	A	A	B	B	B	B	B	B	B	A	A	A	B	A	B	B
493	3A	3127	IWB3127	BobWhite_c4057_320	9.2	B	A	A	B	A	B	B	B	B	A	A	A	B	B	A	B	A	A	A	A	B	A	A	C	B	A	A	C	A	A	B	B	B	B	B	C	B	A	A	A	B	A	B	B
494	3A	63094	IWB63094	RAC875_rep_c77067_347	11	B	A	A	B	A	B	B	B	B	A	A	A	B	B	A	A	A	A	A	A	B	A	A	B	B	A	A	B	A	A	B	B	B	B	B	B	B	A	A	A	B	A	B	B
495	3A	8658	IWB8658	BS00055211_51	11.3	B	A	A	B	A	B	B	B	B	A	A	A	B	B	A	A	A	A	A	A	B	A	A	B	B	A	A	C	A	A	B	B	B	B	B	B	B	A	A	A	B	B	B	B
496	3A	11588	IWB11588	BS00088987_51	11.6	B	A	A	B	A	B	B	B	B	A	A	A	B	B	A	A	A	A	A	A	B	A	A	B	B	A	A	B	A	A	B	B	B	B	B	B	B	A	A	A	B	B	B	B
497	3A	29389	IWB29389	Excalibur_c92401_157	11.8	B	A	A	B	A	B	B	B	B	A	A	A	B	B	A	A	A	A	A	A	B	A	A	B	B	A	A	B	A	A	B	B	B	B	B	B	B	A	A	A	B	B	B	B
498	3A	34921	IWB34921	IAAV4780	13.8	B	A	A	B	A	A	B	B	B	A	B	A	B	B	A	A	A	A	A	A	B	A	A	B	B	A	A	B	A	A	B	B	B	B	B	B	B	A	A	A	B	B	B	B
499	3A	29131	IWB29131	Excalibur_c85173_190	14.4	B	A	A	B	A	A	B	B	B	A	B	A	B	B	A	A	A	A	A	A	B	A	A	C	B	A	A	B	A	A	B	B	B	B	B	B	B	A	A	A	B	B	B	B
500	3A	52332	IWB52332	Ra_c6118_350	15.5	B	A	A	B	A	A	B	B	B	A	B	A	B	B	C	A	A	A	B	A	B	A	A	B	B	A	A	B	A	A	B	B	B	A	B	B	B	A	A	A	B	B	B	B
501	3A	65471	IWB65471	TA001885-0568	20	B	A	A	B	A	A	B	B	B	A	B	B	B	A	C	A	A	A	B	A	B	A	A	B	B	A	A	B	A	A	B	B	B	A	B	B	B	A	A	A	B	B	B	B
502	3A	26668	IWB26668	Excalibur_c4548_2697	21.5	A	A	A	B	B	A	B	B	B	A	B	B	B	A	C	A	A	A	B	A	B	A	A	B	B	A	A	B	A	A	B	B	B	A	B	C	B	A	A	A	B	B	B	B
503	3A	4588	IWB4588	BobWhite_c9249_564	22.3	A	A	A	B	B	A	B	B	B	A	B	B	B	A	C	A	A	A	B	A	B	A	A	C	A	A	A	B	A	A	B	B	B	A	B	C	B	A	A	A	B	B	B	B
504	3A	23480	IWB23480	Excalibur_c20448_318	25.5	A	A	A	B	B	A	B	B	B	A	B	B	B	A	B	A	A	B	B	A	B	A	A	B	A	A	A	B	A	A	B	B	B	A	B	A	B	A	A	A	B	A	B	B
505	3A	3644	IWB3644	BobWhite_c48246_303	25.8	A	A	A	B	B	A	B	B	B	A	B	B	B	A	B	A	A	B	B	A	B	A	A	B	A	A	A	B	A	A	B	B	B	A	B	A	B	A	A	A	B	A	B	B
506	3A	63761	IWB63761	RFL_Contig1896_1236	26.1	A	A	A	B	B	A	B	B	B	B	B	B	B	A	B	A	A	B	B	A	B	A	A	B	A	A	A	B	A	A	B	B	B	A	B	A	B	A	A	A	B	A	B	B
507	3A	78432	IWA4257	wsnp_Ex_c55051_57706127	26.4	A	A	A	B	B	A	B	B	B	B	B	B	B	A	B	A	A	B	B	A	B	A	B	C	A	A	A	B	A	A	B	B	B	A	B	A	B	A	A	A	B	A	B	B
508	3A	29612	IWB29612	Excalibur_c98205_83	26.6	A	A	A	B	B	A	B	B	B	B	B	B	B	A	B	A	A	B	B	C	B	A	B	B	A	A	A	B	A	A	B	B	B	A	B	A	B	A	A	A	B	A	B	B
509	3A	5723	IWB5723	BobWhite_s67516_159	27.2	A	A	A	B	B	A	B	B	B	B	B	B	B	A	B	A	A	B	B	B	B	A	B	C	A	A	A	B	A	A	B	B	B	A	B	A	B	A	A	A	B	A	B	B
510	3A	8523	IWB8523	BS00049032_51	27.5	A	A	A	B	B	A	B	B	B	B	B	B	B	A	B	A	A	B	B	B	B	A	B	B	A	A	A	B	A	A	B	B	B	A	B	A	B	A	A	A	B	A	B	B
511	3A	14561	IWB14561	CAP8_c1702_71	36	A	A	A	B	B	A	B	B	B	B	B	B	B	A	B	A	A	B	A	A	B	A	B	B	A	C	A	B	C	C	A	A	B	A	B	A	B	B	C	A	B	A	B	A
512	3A	73771	IWB73771	Tdurum_contig91865_242	39.9	A	A	A	A	B	A	B	A	B	B	B	B	B	A	B	A	A	B	A	A	B	A	B	B	A	A	A	B	A	A	A	B	B	A	B	A	B	B	A	B	B	A	B	B
513	3A	10063	IWB10063	BS00067499_51	41.2	A	A	A	A	B	A	B	A	B	B	B	B	B	A	B	A	A	B	A	A	B	A	B	B	A	A	B	B	A	A	A	B	B	A	B	A	B	B	A	B	B	A	B	B
514	3A	78031	IWA3739	wsnp_Ex_c4094_7399975	42.7	A	A	A	A	B	A	B	A	B	B	B	B	B	A	B	A	A	B	A	A	B	A	B	C	A	A	B	B	A	A	A	B	B	A	B	A	B	B	A	B	B	A	B	B
515	3A	466	IWB466	BobWhite_c13210_115	43.2	A	A	B	A	B	A	B	A	B	B	B	B	B	A	B	A	A	B	A	A	B	A	B	C	A	A	B	B	A	A	A	B	B	A	B	A	B	B	A	B	B	A	B	B
516	3A	67571	IWB67571	Tdurum_contig12371_197	43.5	A	A	B	A	B	A	B	A	B	B	B	B	B	A	B	A	A	B	A	A	B	A	B	B	A	A	B	B	A	A	A	B	B	A	B	A	B	B	A	B	B	A	B	B
517	3A	28136	IWB28136	Excalibur_c6264_1054	43.7	A	A	B	A	B	A	B	A	B	B	B	B	B	A	B	A	A	B	A	A	B	A	B	B	A	A	B	B	A	A	A	B	B	A	B	A	B	B	A	B	B	A	B	B
518	3A	50280	IWB50280	Kukri_rep_c73936_154	44.3	A	A	B	A	B	A	B	A	B	B	B	B	B	A	B	A	A	B	A	A	B	A	B	B	A	A	B	B	A	A	A	B	B	A	B	A	B	B	A	B	B	A	B	B
519	3A	11867	IWB11867	BS00094366_51	44.6	A	A	B	B	B	A	B	A	B	B	B	B	B	A	B	A	A	B	A	A	B	A	B	C	A	A	B	B	A	A	A	B	B	A	B	A	B	B	A	B	B	A	B	B
520	3A	73711	IWB73711	Tdurum_contig86206_149	44.8	A	A	B	B	B	A	B	A	B	B	B	B	B	A	B	A	A	B	A	A	B	A	B	B	B	A	B	B	A	A	A	B	B	A	B	A	B	B	A	B	B	A	B	B
521	3A	73640	IWB73640	Tdurum_contig83561_227	47.4	A	A	B	B	B	A	B	A	B	B	B	B	B	A	B	A	A	B	B	A	B	A	B	B	B	A	B	A	A	A	A	B	B	A	B	B	B	B	A	B	B	A	B	B
522	3A	61873	IWB61873	RAC875_rep_c109288_122	49.3	A	A	B	B	B	A	B	A	B	B	B	B	B	A	B	A	A	A	B	A	B	A	B	C	B	A	B	A	A	A	A	B	B	A	B	B	B	B	A	B	B	A	B	B
523	3A	71477	IWB71477	Tdurum_contig44029_144	49.6	A	A	B	B	B	A	B	A	B	B	B	B	B	A	B	A	A	A	B	A	B	A	B	B	B	A	B	A	A	A	A	B	B	A	B	B	B	B	A	A	B	A	B	B
524	3A	67277	IWB67277	Tdurum_contig11748_889	49.9	A	A	B	B	B	A	B	A	B	B	B	B	B	A	B	A	A	A	B	A	B	A	B	B	B	A	B	A	A	A	A	B	B	A	B	B	B	B	A	A	B	A	B	B
525	3A	10464	IWB10464	BS00070464_51	50.4	A	A	B	B	B	A	B	A	B	B	B	B	B	A	B	A	A	A	B	A	B	A	B	B	B	A	B	A	A	A	A	B	B	A	B	B	B	B	A	A	B	A	B	B
526	3A	70107	IWB70107	Tdurum_contig30790_154	51	A	A	B	B	B	A	B	A	B	B	B	B	B	A	B	A	A	A	B	A	B	A	B	B	B	A	B	A	A	A	A	B	B	A	B	B	B	B	A	A	B	A	B	B
527	3A	65939	IWB65939	TA005199-0585	52.1	B	A	B	B	B	A	B	A	B	B	B	B	B	A	B	A	A	A	B	A	B	A	B	B	B	A	B	A	A	A	A	B	B	A	B	B	B	B	A	A	B	A	B	B
528	3A	76724	IWA2019	wsnp_Ex_c1538_2937905	52.4	B	A	B	B	B	A	B	A	B	B	B	B	B	A	A	A	A	A	B	A	B	A	B	B	B	A	B	A	A	A	A	B	B	A	B	B	B	B	A	A	B	A	B	B
529	3A	26160	IWB26160	Excalibur_c40694_473	52.6	B	A	B	B	B	A	B	A	B	B	B	B	B	A	A	A	A	A	A	A	B	A	B	B	B	A	B	A	A	A	A	B	B	A	B	B	B	B	A	A	B	A	B	B
530	3A	78239	IWA4009	wsnp_Ex_c48136_53140385	52.9	B	A	B	B	B	A	B	A	B	B	B	B	B	A	A	A	A	A	A	A	B	A	B	B	B	A	B	A	A	A	A	B	B	A	B	B	B	B	A	A	B	A	B	B
531	3A	11609	IWB11609	BS00089400_51	53.7	B	A	B	B	B	A	B	A	B	B	B	B	B	A	A	A	A	A	A	A	B	A	B	B	B	A	B	A	A	A	A	B	B	A	B	B	B	B	A	A	B	A	B	B
532	3A	29336	IWB29336	Excalibur_c91154_175	54.3	A	A	B	B	B	A	B	A	B	B	B	B	B	A	A	C	A	A	A	A	B	A	B	B	B	A	B	A	A	A	A	B	B	A	B	B	B	B	A	A	B	A	B	B
533	3A	78947	IWA4913	wsnp_Ex_c943_1808577	54.6	A	A	B	B	B	A	B	A	B	B	B	B	B	A	A	A	A	A	A	A	B	A	B	B	B	A	B	A	A	A	A	B	B	A	B	B	B	B	A	A	B	A	B	B
534	3A	71028	IWB71028	Tdurum_contig42234_2052	54.8	A	A	B	B	B	A	B	A	B	B	B	B	B	A	A	A	A	A	A	A	B	A	B	B	B	A	B	A	A	A	A	B	B	A	B	B	B	B	A	A	B	A	B	B
535	3A	38468	IWB38468	Ku_c1485_980	55.4	A	A	B	B	B	A	B	A	B	B	B	B	B	A	A	A	A	A	A	A	B	A	B	B	B	A	B	A	A	A	A	B	B	A	B	B	B	B	A	A	B	A	B	B
536	3A	76466	IWA1699	wsnp_Ex_c12850_20377830	56.5	A	A	B	B	B	A	B	A	B	B	B	B	B	A	A	A	A	A	A	A	B	A	B	B	B	A	B	A	A	A	A	B	B	A	B	B	B	B	A	B	B	A	B	B
537	3A	76259	IWA1435	wsnp_Ex_c11085_17973016	57.3	A	A	B	B	B	A	B	A	B	B	B	B	B	A	A	A	A	A	A	A	B	A	B	B	B	A	B	A	A	A	A	B	B	A	B	B	B	B	A	B	B	A	B	B
538	3A	75506	IWA249	wsnp_BE494474A_Ta_2_2	57.6	A	A	B	B	B	A	B	A	B	B	B	B	B	A	A	A	A	A	A	A	B	A	B	B	B	A	B	A	A	A	A	B	B	A	B	B	B	B	A	B	B	A	B	B
539	3A	10508	IWB10508	BS00070870_51	58.2	A	A	B	B	B	A	A	A	B	B	B	B	B	A	A	A	A	A	A	A	B	A	B	B	B	A	B	A	A	A	A	B	B	A	B	B	B	B	A	B	B	A	B	B
540	3A	66938	IWB66938	Tdurum_contig11121_739	59.3	A	A	B	B	B	A	A	A	B	B	B	B	B	A	A	A	A	A	A	A	B	A	B	B	B	A	B	A	A	A	A	B	B	A	B	B	B	B	A	B	B	A	B	B
541	3A	76392	IWA1605	wsnp_Ex_c12269_19597415	59.6	A	A	B	B	B	A	A	A	B	B	B	B	B	A	A	A	A	A	A	A	B	A	B	B	B	A	B	A	A	A	A	B	B	A	B	B	B	B	A	B	B	A	B	B
542	3A	42049	IWB42049	Kukri_c18924_528	59.9	A	A	B	B	B	A	A	A	B	A	B	B	B	A	A	A	A	A	A	A	B	A	B	B	B	A	B	A	A	A	A	B	B	A	B	B	B	B	A	B	B	A	B	B
543	3A	80271	IWA6750	wsnp_Ku_c23901_33846711	60.2	A	A	B	B	B	A	A	A	B	A	B	B	B	A	A	A	A	A	A	A	B	A	B	B	B	A	C	A	A	A	A	B	A	A	C	B	B	B	A	B	B	A	B	C
544	3A	72822	IWB72822	Tdurum_contig61819_115	60.5	A	A	B	B	B	A	A	A	B	A	B	B	B	A	A	A	A	A	A	A	B	A	B	B	B	A	B	A	A	B	A	B	A	A	B	B	B	B	A	B	B	A	B	B
545	3A	4133	IWB4133	BobWhite_c6300_169	61.1	A	A	B	B	B	A	A	A	B	A	B	B	B	A	A	A	A	A	A	A	B	A	B	B	B	A	B	A	A	B	A	B	A	A	B	B	B	B	A	B	B	A	B	B
546	3A	67254	IWB67254	Tdurum_contig11714_304	62.2	A	A	B	B	B	A	A	A	B	A	B	B	B	A	A	A	A	A	A	A	B	A	B	B	B	A	B	A	A	B	A	B	A	A	B	B	B	B	A	B	B	A	B	B
547	3A	8683	IWB8683	BS00056089_51	71.5	A	A	B	A	B	A	A	A	B	A	B	B	B	A	A	A	A	B	A	A	B	A	B	B	B	A	B	A	A	B	A	B	B	A	B	B	B	B	C	B	A	A	B	A
548	3A	8830	IWB8830	BS00061173_51	72.6	A	A	B	A	A	A	A	A	B	A	B	B	B	A	A	A	A	B	A	A	B	A	B	B	B	A	B	A	A	B	A	B	B	A	B	B	B	B	B	B	A	A	B	A
549	3A	11155	IWB11155	BS00080879_51	72.9	A	A	B	A	A	A	A	A	B	A	B	B	B	A	A	A	A	B	A	A	B	A	B	B	B	A	B	A	A	B	A	B	B	A	B	B	B	B	B	B	A	A	B	A
550	3A	60142	IWB60142	RAC875_c67998_96	73.7	A	A	B	A	A	A	A	A	B	A	B	B	B	A	A	A	A	B	A	A	B	A	B	B	A	A	B	A	A	B	A	B	B	A	B	B	B	B	B	B	A	A	B	A
551	3A	44225	IWB44225	Kukri_c33640_640	74	A	B	B	A	A	A	A	A	B	A	B	B	B	A	A	A	A	B	A	A	B	A	B	B	A	A	B	A	A	B	A	B	B	A	B	B	B	B	B	B	A	A	B	A
552	3A	10607	IWB10607	BS00072296_51	85	B	B	B	A	A	A	A	A	A	B	B	B	B	A	A	B	B	B	A	A	B	A	B	B	A	B	B	A	C	B	A	B	B	A	B	B	B	A	B	B	A	A	B	A
553	3A	76066	IWA1136	wsnp_CAP8_c1007_643393	86.4	B	B	B	A	A	A	A	A	A	B	B	B	B	A	A	B	B	B	A	A	B	A	B	C	A	B	B	A	C	B	A	B	C	A	B	B	B	A	B	B	A	A	B	A
554	3A	73699	IWB73699	Tdurum_contig8584_354	89.1	B	B	B	A	A	A	A	A	A	B	C	B	B	A	A	B	B	B	A	A	B	A	B	C	A	A	B	A	C	B	A	B	A	A	B	B	B	A	B	B	A	A	B	A
555	3A	71660	IWB71660	Tdurum_contig4598_249	89.3	B	B	B	A	A	A	A	A	A	B	B	B	B	A	A	B	B	B	A	A	B	A	B	C	A	A	B	A	C	B	A	B	A	A	B	B	B	A	B	B	A	A	B	A
556	3A	35450	IWB35450	IAAV8218	90.2	B	B	B	A	A	A	B	A	A	B	B	B	B	A	A	B	B	B	A	A	B	A	B	A	A	A	B	A	C	B	A	B	A	A	B	B	B	A	B	B	A	A	B	A
557	3A	3798	IWB3798	BobWhite_c5337_225	93.4	B	B	B	A	C	A	B	A	A	B	B	B	B	B	A	B	B	B	A	A	B	A	B	A	A	A	B	A	C	B	A	B	A	A	B	C	B	A	B	B	A	A	B	A
558	3A	72394	IWB72394	Tdurum_contig54800_615	94.3	B	B	B	A	A	A	B	A	A	B	B	B	B	B	A	B	B	B	A	A	B	B	B	A	A	A	B	A	C	B	A	B	A	A	B	A	B	A	B	B	A	A	B	A
559	3A	25443	IWB25443	Excalibur_c3429_652	95.1	B	B	B	A	A	A	B	A	A	B	B	B	B	B	A	B	B	B	A	A	B	B	A	A	A	A	B	A	C	B	A	B	A	A	B	A	B	A	A	B	A	A	B	A
560	3A	8816	IWB8816	BS00060666_51	96.3	B	B	B	A	A	A	B	A	A	B	B	B	B	B	A	B	B	B	A	A	B	B	A	A	A	A	B	A	A	C	A	B	A	A	B	A	B	A	B	B	A	A	B	A
561	3A	31324	IWB31324	Excalibur_rep_c82288_36	97.1	B	B	B	A	A	A	B	A	A	B	B	B	B	B	A	B	B	B	A	A	B	B	A	A	A	A	B	A	C	B	A	B	A	A	B	A	B	A	A	B	A	A	B	A
562	3A	80007	IWA6396	wsnp_Ku_c10468_17301216	101.3	B	B	B	A	A	A	B	B	A	B	A	B	B	B	A	B	B	B	A	A	B	B	A	A	A	A	B	A	C	B	A	B	B	A	B	A	B	A	A	A	A	B	B	A
563	3A	9995	IWB9995	BS00067228_51	101.9	B	B	B	A	A	A	B	B	A	B	A	B	B	B	A	B	B	B	A	A	B	B	A	A	A	A	B	A	C	B	A	B	B	A	B	A	B	A	A	A	A	B	B	A
564	3A	39724	IWB39724	Ku_c6126_1140	102.2	B	B	B	A	A	A	B	B	A	B	A	B	B	B	A	B	B	B	A	A	B	B	A	A	A	A	B	A	C	B	A	B	B	A	B	A	B	A	A	A	A	B	B	A
565	3A	24136	IWB24136	Excalibur_c24354_465	103	B	B	B	A	A	A	B	B	A	B	A	B	B	B	A	B	B	B	A	A	B	B	A	A	A	A	B	A	A	B	A	B	B	A	B	A	B	A	A	A	A	B	B	A
566	3A	26070	IWB26070	Excalibur_c3969_1208	104.4	B	B	B	A	A	A	B	B	B	A	A	B	B	B	A	B	B	B	A	A	B	B	A	A	A	A	B	A	C	B	A	B	B	A	B	A	B	A	A	A	A	B	B	A
567	3A	32679	IWB32679	GENE-1833_70	105.3	B	B	B	A	A	A	B	B	B	A	A	B	B	B	B	B	B	B	A	A	B	B	A	A	A	A	B	A	C	B	A	B	B	A	B	A	B	A	A	A	A	B	B	A
568	3A	73551	IWB73551	Tdurum_contig82189_87	105.5	B	B	B	A	A	A	B	B	B	A	A	B	B	B	B	B	B	B	A	A	A	B	A	A	A	A	B	A	C	B	A	B	B	A	B	A	B	A	A	A	A	B	B	A
569	3A	33546	IWB33546	GENE-3665_61	113.1	B	A	B	A	B	A	B	B	B	A	A	B	B	B	B	B	B	B	A	B	A	B	A	B	A	A	B	A	A	B	A	B	B	A	B	A	B	A	A	A	A	B	B	A
570	3A	366	IWB366	BobWhite_c12428_371	113.4	B	A	B	A	B	A	B	B	B	A	A	B	B	B	B	B	B	B	A	B	A	B	A	B	A	A	B	A	A	B	A	B	B	A	B	B	B	A	A	A	A	B	B	A
571	3A	75600	IWA391	wsnp_BE604885A_Ta_2_2	113.9	B	A	B	A	B	A	B	B	B	A	A	B	B	B	B	B	B	B	A	B	A	B	A	B	A	A	B	A	A	B	A	B	B	A	B	B	B	A	A	A	A	B	B	A
572	3A	7790	IWB7790	BS00030652_51	114.2	B	A	B	A	B	A	B	B	B	A	A	B	B	B	B	B	B	B	A	B	A	B	A	B	A	B	B	A	A	B	A	B	B	A	B	B	B	A	A	A	A	B	B	A
573	3A	8509	IWB8509	BS00048633_51	116.9	B	A	B	A	B	A	B	B	B	A	A	B	B	B	B	B	B	B	B	B	A	B	A	B	B	B	B	A	A	B	A	B	B	C	B	B	B	A	A	A	A	B	B	A
574	3A	61868	IWB61868	RAC875_rep_c109228_400	117.4	B	A	B	A	B	A	B	B	B	A	A	B	B	B	B	B	B	B	B	B	A	B	A	B	B	B	B	A	A	B	A	B	B	C	B	B	B	A	A	A	A	B	B	A
575	3A	34789	IWB34789	IAAV3851	118.9	B	A	B	A	B	A	B	B	B	A	A	B	B	A	B	B	B	B	B	B	A	B	A	B	B	B	B	A	A	B	A	B	A	C	B	B	B	A	A	A	A	B	B	A
576	3A	39004	IWB39004	Ku_c26872_269	119.7	B	A	B	A	B	A	B	B	B	A	A	B	B	A	B	B	B	B	B	B	A	B	A	B	B	C	B	A	A	B	A	B	A	C	B	B	B	A	A	A	A	B	B	A
577	3A	77888	IWA3559	wsnp_Ex_c361_707953	121.2	B	A	B	A	B	A	B	B	B	A	A	B	B	A	B	B	B	B	B	B	A	B	A	B	B	C	B	A	A	B	A	B	A	C	B	B	B	A	C	A	A	B	B	A
578	3A	56227	IWB56227	RAC875_c28721_290	122.4	B	A	B	A	B	A	B	B	B	A	A	B	B	A	B	B	B	B	B	B	A	B	A	B	B	C	A	C	A	B	A	B	A	C	B	B	B	B	A	A	A	B	B	C
579	3A	14312	IWB14312	CAP7_c915_121	124.2	B	A	B	A	B	A	B	B	B	A	A	A	B	A	B	B	B	B	B	B	A	B	A	B	B	C	A	A	A	B	A	B	A	C	B	B	B	B	A	A	A	B	B	A
580	3B	51276	IWB51276	Ra_c17608_960	0	B	B	B	B	B	B	B	B	B	B	B	B	B	B	B	B	B	B	B	B	B	B	B	A	B	B	B	B	B	B	B	B	B	B	B	B	B	B	B	B	B	B	B	B
581	3B	12141	IWB12141	BS00100706_51	0.8	B	B	B	B	B	B	B	B	B	B	B	B	B	B	B	B	B	B	B	B	B	B	B	B	B	B	B	B	B	B	B	B	B	B	B	B	B	B	B	B	B	B	B	B
582	3B	53982	IWB53982	RAC875_c14696_980	1.1	B	B	B	B	B	B	B	B	B	B	B	B	B	B	B	B	B	B	B	B	B	B	B	B	B	B	B	B	B	B	B	B	B	B	B	B	B	B	B	B	B	B	B	B
583	3B	66970	IWB66970	Tdurum_contig11192_373	1.7	B	B	B	B	B	B	B	B	B	B	B	B	B	B	B	B	B	B	B	B	B	B	B	B	B	B	B	B	B	B	B	B	B	B	B	B	B	B	B	B	B	B	B	B
584	3B	62540	IWB62540	RAC875_rep_c69171_92	3	B	B	B	B	B	B	B	B	B	B	B	B	B	B	B	B	B	B	B	B	B	B	B	B	B	B	B	B	B	B	B	B	B	B	B	B	B	B	B	B	B	B	B	B
585	3B	44132	IWB44132	Kukri_c32803_150	4.2	B	C	B	C	C	B	B	B	B	B	B	B	B	B	B	B	B	B	B	B	B	B	B	A	B	B	B	B	B	B	B	B	B	B	B	B	B	B	B	B	B	B	B	B
586	3B	34636	IWB34636	IAAV2929	20.7	A	A	B	A	A	A	A	B	B	B	A	A	B	B	A	B	A	B	A	B	B	B	B	A	A	B	B	B	B	B	B	B	A	A	B	A	B	B	B	A	B	A	A	A
587	3B	30660	IWB30660	Excalibur_rep_c114249_187	22.1	A	A	B	A	A	A	A	B	B	A	A	B	B	B	A	B	A	B	A	B	B	B	B	C	A	B	B	B	B	B	B	B	A	A	B	A	B	B	B	A	B	A	A	A
588	3B	8755	IWB8755	BS00058860_51	25.6	A	A	B	A	A	A	A	B	B	A	A	B	B	B	A	B	A	B	A	B	B	B	B	C	A	B	B	B	B	B	B	B	A	A	B	A	B	B	B	A	B	A	A	B
589	3B	70488	IWB70488	Tdurum_contig34149_219	26.7	A	A	B	A	A	B	A	B	B	A	A	B	B	B	A	B	A	B	A	B	B	B	B	B	A	B	B	B	B	B	B	B	A	A	B	A	B	B	B	A	B	A	A	B
590	3B	79180	IWA5203	wsnp_Ex_rep_c66331_64503065	26.9	A	A	B	A	A	B	A	B	B	A	A	B	B	B	A	B	A	B	A	B	B	B	B	B	A	B	B	B	B	B	B	B	A	A	B	A	B	B	B	A	B	A	A	B
591	3B	5600	IWB5600	BobWhite_rep_c66215_299	27.2	A	C	B	A	A	B	A	B	B	A	A	B	B	B	A	B	A	B	A	B	B	B	B	B	A	B	B	B	B	B	B	B	A	A	B	A	B	B	B	A	B	A	A	B
592	3B	2424	IWB2424	BobWhite_c3111_636	27.5	A	A	B	A	A	B	A	B	B	A	A	B	B	B	A	B	A	B	A	B	B	B	B	B	A	B	B	B	B	B	B	B	A	A	B	A	B	B	B	A	B	A	A	B
593	3B	78860	IWA4800	wsnp_Ex_c8386_14127329	29.2	A	A	B	A	A	B	A	B	B	A	A	B	B	B	A	B	A	B	A	B	B	B	B	B	A	B	B	B	B	B	B	B	A	A	B	A	B	B	B	A	B	A	A	B
594	3B	68173	IWB68173	Tdurum_contig14251_431	29.4	A	A	B	A	A	B	A	B	B	A	A	B	B	B	A	B	A	B	A	B	B	B	B	C	A	B	B	B	B	B	B	B	A	A	B	A	B	B	B	A	B	A	A	B
595	3B	78861	IWA4801	wsnp_Ex_c8386_14128029	29.7	A	A	B	A	A	B	A	B	B	A	A	B	B	B	A	B	A	B	A	B	B	B	B	A	A	B	B	B	B	B	B	B	A	A	B	A	B	B	B	A	B	A	A	B
596	3B	6931	IWB6931	BS00022154_51	30.5	A	A	B	A	A	B	A	B	B	A	A	B	B	B	A	B	A	B	A	B	B	B	B	A	A	B	B	B	B	B	B	B	A	A	B	A	B	B	B	A	B	A	A	B
597	3B	12932	IWB12932	CAP11_c527_306	30.8	A	A	B	A	A	B	A	B	B	A	A	B	B	B	A	B	A	B	A	B	B	B	B	A	A	B	B	B	B	B	B	B	A	A	B	A	B	B	B	A	B	A	A	B
598	3B	37219	IWB37219	JD_c23336_253	31.1	A	A	B	A	A	B	A	B	B	A	A	B	B	B	A	B	A	B	A	B	B	B	B	C	A	B	B	B	B	B	B	B	A	A	B	A	B	B	B	A	B	A	A	B
599	3B	4653	IWB4653	BobWhite_c9711_71	31.3	A	A	B	A	A	B	A	B	B	A	A	B	B	B	A	B	A	B	A	B	B	B	B	B	A	B	B	B	B	B	B	B	A	A	B	A	B	B	B	A	B	A	A	B
600	3B	73453	IWB73453	Tdurum_contig79629_538	31.6	A	A	B	A	A	B	A	B	B	A	A	B	B	B	A	B	A	B	A	B	B	B	B	B	A	B	B	B	B	B	B	B	A	A	B	A	B	B	B	A	B	A	A	B
601	3B	28657	IWB28657	Excalibur_c7321_741	35.2	A	A	A	A	A	B	A	B	B	A	A	B	B	B	A	B	A	B	A	A	B	B	B	C	A	B	A	B	B	B	B	B	A	A	B	A	B	B	B	A	B	A	A	B
602	3B	29378	IWB29378	Excalibur_c9206_836	37.8	A	A	A	A	A	B	A	B	B	A	A	B	B	B	A	B	A	B	A	A	B	B	B	A	A	A	A	B	A	B	B	B	A	A	B	A	B	B	B	B	B	A	A	B
603	3B	26991	IWB26991	Excalibur_c48841_1380	39	A	A	A	A	A	B	A	B	B	A	A	B	B	B	A	B	A	B	A	C	B	B	B	A	A	A	A	B	A	B	B	B	A	A	B	A	B	B	B	B	B	A	A	B
604	3B	36123	IWB36123	IACX6214	39.3	A	A	A	A	A	B	A	B	B	A	A	B	B	B	A	B	A	B	A	A	B	B	B	C	A	A	A	B	A	B	B	B	A	A	B	A	B	B	B	B	B	A	A	B
605	3B	72944	IWB72944	Tdurum_contig63427_344	39.8	A	A	A	A	A	B	A	B	B	A	A	B	B	B	A	B	A	B	A	A	B	B	B	B	A	A	A	B	A	B	B	B	A	A	B	A	B	B	B	B	B	A	A	B
606	3B	8426	IWB8426	BS00046375_51	40.1	A	A	A	A	A	B	A	B	B	A	A	B	B	B	A	B	A	B	A	A	B	B	B	B	A	A	A	B	A	B	B	B	A	A	B	A	B	B	B	B	B	A	A	B
607	3B	64404	IWB64404	RFL_Contig3591_1832	42.1	A	A	A	A	A	B	A	B	B	A	A	B	B	B	A	B	A	B	A	A	B	B	B	C	A	A	A	B	A	B	B	B	A	A	B	A	B	B	B	B	B	A	A	B
608	3B	72675	IWB72675	Tdurum_contig59668_415	42.4	A	A	A	A	A	B	A	B	B	A	A	B	B	B	A	B	A	B	A	A	B	B	B	A	A	A	A	B	A	B	B	B	A	A	B	A	B	B	B	B	B	A	A	B
609	3B	10462	IWB10462	BS00070455_51	45.9	A	A	A	A	A	B	A	B	B	A	A	B	B	B	C	B	A	B	A	A	C	B	A	C	A	A	A	B	A	B	B	B	A	A	A	A	B	A	B	B	B	A	A	B
610	3B	2169	IWB2169	BobWhite_c28090_175	46.4	A	A	A	A	A	B	A	B	B	A	A	B	B	B	C	B	A	B	A	A	C	B	A	B	A	A	A	B	A	B	B	B	A	A	A	A	B	A	B	B	B	A	A	B
611	3B	39127	IWB39127	Ku_c30806_235	47	A	A	A	A	A	B	A	B	B	A	A	B	B	B	C	B	A	B	A	A	C	B	A	A	A	A	A	B	A	B	B	B	A	A	A	A	B	A	B	B	B	A	A	B
612	3B	64362	IWB64362	RFL_Contig3455_629	50.5	A	A	A	A	A	B	A	B	B	B	A	B	B	B	B	B	A	B	A	A	C	B	A	C	A	A	A	B	A	B	B	B	A	A	A	A	A	A	B	B	B	A	A	B
613	3B	56030	IWB56030	RAC875_c27152_476	50.8	A	A	A	A	A	B	A	B	B	B	A	B	A	B	B	B	A	B	A	A	A	B	A	B	A	A	A	B	A	B	B	B	A	A	A	A	A	A	B	B	B	A	A	B
614	3B	54838	IWB54838	RAC875_c19475_61	51.3	A	A	A	A	A	B	A	B	B	B	A	B	A	B	B	B	A	B	A	A	C	B	A	A	A	A	A	B	A	B	B	B	A	A	A	A	A	A	B	B	B	A	A	B
615	3B	7019	IWB7019	BS00022315_51	51.6	A	A	A	B	A	B	A	B	B	B	A	B	A	B	B	B	A	B	A	A	C	B	A	C	A	A	A	C	A	B	B	B	A	A	A	A	A	A	B	B	B	A	A	B
616	3B	11529	IWB11529	BS00087825_51	51.9	A	A	A	B	A	B	A	B	B	B	A	B	A	B	B	B	A	B	A	A	C	B	A	C	A	A	A	B	A	B	B	B	A	A	A	A	A	A	B	B	B	A	B	B
617	3B	10687	IWB10687	BS00073732_51	52.1	A	A	A	B	A	B	A	B	B	B	A	B	A	B	B	B	A	B	A	A	A	B	A	C	A	A	A	B	A	B	B	B	A	A	A	A	A	A	A	B	B	A	B	B
618	3B	25620	IWB25620	Excalibur_c35645_587	55.4	A	A	A	B	A	B	A	B	A	B	A	B	A	B	B	A	A	B	B	A	C	B	B	C	A	A	A	A	A	B	B	B	A	A	A	A	A	A	A	B	B	A	A	B
619	3B	36611	IWB36611	Jagger_c4901_95	56	A	A	A	B	A	B	A	B	A	B	A	B	A	B	B	A	A	B	B	A	C	B	B	B	A	A	A	A	A	A	B	B	A	A	A	A	A	A	A	B	B	A	A	B
620	3B	35458	IWB35458	IAAV8287	56.8	A	A	A	B	A	B	A	A	A	B	A	B	A	B	B	A	A	B	B	A	C	B	B	B	A	A	A	A	A	A	B	B	A	A	A	A	A	A	A	B	B	A	A	B
621	3B	34239	IWB34239	GENE-4918_402	57	A	A	A	B	A	B	A	A	A	B	A	B	A	B	B	A	A	B	B	A	C	B	B	C	A	A	A	A	A	A	B	B	A	A	A	A	A	A	A	B	B	A	A	B
622	3B	80179	IWA6632	wsnp_Ku_c17659_26797674	57.9	A	A	A	B	A	B	A	A	A	B	A	B	A	B	B	A	A	B	B	A	C	B	B	B	A	A	A	A	A	A	B	B	A	A	A	A	A	A	A	B	B	A	A	B
623	3B	3423	IWB3423	BobWhite_c4502_252	58.1	A	A	A	B	A	B	A	A	A	B	A	B	A	B	B	A	A	B	B	A	C	B	B	B	A	A	A	A	A	A	B	B	A	A	A	A	A	A	A	B	B	A	A	B
624	3B	38850	IWB38850	Ku_c23207_988	60.7	A	A	A	B	A	B	A	A	A	B	A	B	A	B	B	A	A	B	A	A	C	B	B	B	A	A	A	A	A	A	B	B	A	A	A	A	A	A	A	B	B	B	A	A
625	3B	5902	IWB5902	BS00003822_51	61.5	A	A	A	B	A	B	A	A	A	B	A	B	A	B	B	A	A	B	A	A	C	B	B	B	A	A	A	A	A	A	B	B	A	A	A	A	A	A	A	B	B	B	A	A
626	3B	79891	IWA6192	wsnp_JD_c828_1226159	63	A	B	A	B	A	B	A	A	A	B	A	B	A	B	B	A	A	B	A	A	C	B	B	A	A	A	A	A	A	A	B	B	A	A	A	A	A	A	A	B	B	B	A	A
627	3B	3459	IWB3459	BobWhite_c45376_417	65.3	A	B	A	B	A	B	A	A	A	B	A	B	A	B	B	A	A	B	A	A	A	B	B	A	A	A	A	A	A	A	B	B	A	A	A	A	B	A	A	B	B	B	A	A
628	3B	34980	IWB34980	IAAV5166	71	B	B	A	B	A	A	A	A	A	B	A	B	A	B	B	B	A	B	B	A	A	B	B	A	A	A	A	A	A	A	B	B	A	A	A	B	B	B	A	A	B	B	A	A
629	3B	967	IWB967	BobWhite_c16847_343	71.5	B	B	A	B	A	A	A	A	A	B	A	B	A	B	B	B	A	B	B	A	A	B	B	A	A	A	A	A	A	A	B	B	A	A	A	B	B	C	A	A	B	B	A	A
630	3B	45079	IWB45079	Kukri_c40909_784	71.8	B	B	A	B	A	A	A	A	A	B	A	B	A	B	B	B	A	B	B	A	A	B	B	A	A	A	A	A	A	A	B	B	A	A	A	B	B	C	A	A	B	B	A	A
631	3B	54463	IWB54463	RAC875_c17404_1160	72.1	B	B	A	B	A	A	A	A	A	B	A	B	A	B	B	B	A	B	B	A	A	B	B	A	A	A	A	A	A	A	B	B	A	A	A	B	B	C	A	A	B	B	A	A
632	3B	1448	IWB1448	BobWhite_c20876_475	72.4	B	B	A	B	A	A	A	A	A	B	A	B	A	B	B	B	A	B	B	A	A	B	C	A	A	A	A	A	A	A	B	B	A	A	A	B	B	C	A	A	B	B	A	A
633	3B	72454	IWB72454	Tdurum_contig55486_333	72.6	B	B	A	B	A	A	A	A	A	B	A	B	A	B	B	B	A	B	B	A	A	B	B	A	A	A	A	A	A	A	B	B	A	A	A	B	B	C	A	A	B	B	A	A
634	3B	36726	IWB36726	Jagger_c7188_67	73.2	B	B	A	B	A	A	A	A	A	B	A	B	A	B	B	B	A	B	B	A	A	B	B	A	A	A	A	A	A	A	B	B	A	A	A	B	B	A	A	A	B	B	A	A
635	3B	64939	IWB64939	RFL_Contig5246_1091	73.5	B	B	A	B	A	A	A	A	A	B	A	B	A	B	B	B	A	B	B	A	A	B	B	A	A	A	A	A	A	A	B	B	A	A	A	B	B	C	A	A	B	B	A	A
636	3B	64191	IWB64191	RFL_Contig304_729	73.7	B	B	A	B	A	A	A	A	A	B	A	B	A	B	B	B	A	B	B	A	A	B	B	A	A	A	A	A	A	A	B	B	A	A	A	B	B	C	A	A	B	B	A	A
637	3B	77452	IWA3000	wsnp_Ex_c2580_4800027	74	B	B	A	B	A	A	A	A	A	B	A	B	A	B	B	B	A	B	B	A	A	B	B	A	A	A	A	A	A	A	B	B	A	A	A	B	B	C	A	A	B	B	A	A
638	3B	24866	IWB24866	Excalibur_c29625_222	74.5	B	B	A	B	A	A	A	A	A	B	A	B	A	B	B	B	A	B	B	A	A	B	B	A	A	A	A	A	A	A	B	B	A	A	A	B	B	C	A	A	B	B	A	A
639	3B	26271	IWB26271	Excalibur_c41752_392	74.8	B	B	A	B	A	A	A	A	A	B	A	B	A	B	B	B	A	B	B	A	A	B	B	A	A	A	A	A	A	A	B	B	A	C	A	B	B	C	A	A	B	B	A	A
640	3B	281	IWB281	BobWhite_c1196_297	75.1	B	B	A	B	A	A	A	A	A	B	A	B	A	B	B	B	A	B	B	A	A	B	B	A	A	A	A	A	A	A	B	B	A	A	A	B	B	C	A	A	B	B	A	A
641	3B	1846	IWB1846	BobWhite_c24718_225	75.4	B	B	A	B	A	A	A	A	A	B	A	B	A	B	B	B	A	B	B	A	A	B	B	A	A	A	A	A	A	A	B	B	A	A	A	B	B	C	A	A	B	B	A	A
642	3B	18115	IWB18115	D_GB5Y7FA02I44NU_340	75.6	B	B	A	B	A	A	A	A	A	B	A	B	A	B	B	B	A	B	B	A	A	B	B	C	A	A	A	C	A	A	B	B	A	A	A	B	B	B	A	A	B	B	A	A
643	3B	56763	IWB56763	RAC875_c32792_231	75.9	B	B	A	B	A	A	A	A	A	B	A	B	A	B	B	B	A	B	B	A	A	B	B	A	A	A	A	A	A	A	B	B	A	A	A	B	B	C	A	A	B	B	A	A
644	3B	12064	IWB12064	BS00099364_51	76.5	B	B	A	B	A	A	A	A	A	B	A	B	A	B	B	B	A	B	B	A	A	B	B	A	A	A	A	A	A	A	B	B	A	A	A	B	B	C	A	A	B	B	A	A
645	3B	32129	IWB32129	GENE-0875_57	76.7	B	B	A	B	A	A	A	A	A	B	A	B	A	B	B	B	A	B	B	A	A	B	B	A	A	A	A	A	A	A	B	B	A	A	A	B	B	C	A	A	B	B	A	A
646	3B	4885	IWB4885	BobWhite_rep_c50457_813	77	B	B	A	B	A	A	A	A	A	B	A	B	A	B	B	B	A	B	B	A	A	B	B	A	A	A	A	A	A	A	B	B	A	A	A	B	B	C	A	A	B	B	A	A
647	3B	11393	IWB11393	BS00084911_51	77.6	B	B	A	B	A	A	A	A	A	B	A	B	A	B	B	A	A	B	B	A	A	B	B	A	A	A	A	A	A	A	B	B	A	A	A	B	B	C	A	A	B	B	A	A
648	3B	3723	IWB3723	BobWhite_c5095_634	78.4	B	B	A	B	A	A	A	A	A	B	A	B	A	B	B	A	A	B	B	A	A	B	B	A	A	A	A	A	A	A	B	B	A	A	A	B	B	C	C	A	B	B	B	A
649	3B	35680	IWB35680	IACX11287	78.7	B	B	A	B	A	A	A	A	A	B	A	B	A	B	B	A	A	B	B	A	A	B	B	A	A	A	A	A	A	A	B	B	A	A	A	B	B	C	C	A	B	B	B	A
650	3B	26579	IWB26579	Excalibur_c44713_137	79.2	B	B	A	B	A	A	A	A	A	B	A	B	A	B	B	A	A	B	B	A	A	B	B	A	A	A	A	A	A	A	B	B	A	A	A	B	B	C	C	A	A	B	B	A
651	3B	25775	IWB25775	Excalibur_c36999_270	79.5	B	B	A	B	A	A	A	A	A	B	A	B	A	B	B	A	A	B	B	A	A	B	B	A	A	A	A	A	B	A	B	B	A	A	A	C	B	A	C	A	A	B	B	A
652	3B	80726	IWA7353	wsnp_Ku_c93664_84327484	79.8	B	B	A	B	B	A	A	A	A	B	A	B	A	B	B	A	A	B	B	A	A	B	B	A	A	A	A	A	B	A	B	B	A	A	A	B	B	C	C	A	A	B	B	A
653	3B	80246	IWA6720	wsnp_Ku_c21818_31604716	80	B	B	A	B	B	A	A	A	A	B	A	B	A	B	B	A	A	B	B	A	A	B	B	A	A	A	A	A	B	A	B	B	A	A	A	B	B	C	C	A	A	B	B	A
654	3B	81335	IWA8196	wsnp_Ra_rep_c74606_72470419	80.3	B	B	A	B	B	A	A	A	A	B	A	B	A	B	B	A	A	B	B	A	A	B	B	A	A	A	A	A	B	A	B	B	A	B	A	B	B	C	C	A	A	B	B	A
655	3B	28943	IWB28943	Excalibur_c80041_400	80.6	B	B	A	B	B	A	A	A	A	B	A	B	A	B	B	A	A	B	B	A	A	B	B	A	A	A	A	A	B	A	B	B	A	B	A	B	B	C	C	A	A	B	B	A
656	3B	27350	IWB27350	Excalibur_c5298_171	80.9	B	B	A	B	B	A	A	A	A	B	A	B	A	B	B	A	A	B	B	A	A	B	B	A	A	A	A	A	B	A	B	B	A	B	A	B	B	C	C	A	A	B	B	A
657	3B	453	IWB453	BobWhite_c13099_755	81.1	B	B	A	B	B	A	A	A	A	B	A	B	A	B	B	A	A	B	B	B	A	B	B	A	A	A	A	A	B	A	B	B	A	B	A	B	B	C	C	A	A	B	B	A
658	3B	65004	IWB65004	RFL_Contig5418_347	81.4	B	B	A	B	B	A	A	A	A	B	A	B	A	B	B	A	A	B	B	B	A	B	B	A	A	A	A	A	B	A	B	B	A	B	A	B	B	C	C	A	A	B	B	A
659	3B	48415	IWB48415	Kukri_c9571_73	81.7	B	B	A	B	B	A	A	A	A	B	A	B	A	B	B	A	A	B	B	B	A	B	B	A	A	A	A	A	B	A	B	B	A	B	A	B	B	C	C	A	A	B	B	A
660	3B	21557	IWB21557	Excalibur_c1014_371	81.9	B	B	A	B	B	A	A	A	A	B	A	B	A	B	B	A	A	B	B	B	A	B	B	A	A	A	A	A	B	A	B	B	A	B	A	B	B	C	C	A	A	B	B	A
661	3B	63703	IWB63703	RFL_Contig167_504	82.2	B	B	A	B	B	A	A	A	A	B	A	B	A	B	B	A	A	B	B	B	A	B	B	A	A	A	A	A	B	A	B	B	A	B	A	B	B	A	C	A	A	B	B	A
662	3B	22603	IWB22603	Excalibur_c15332_1194	82.5	B	B	A	B	B	A	A	A	A	B	A	B	A	B	B	A	A	B	B	B	A	B	B	A	A	A	A	A	B	A	B	B	A	B	A	B	B	A	C	A	A	B	B	A
663	3B	81523	IWA8520	wsnp_RFL_Contig383_4163148	83	B	B	A	B	B	A	A	A	A	B	A	B	A	B	B	A	A	B	B	B	A	B	B	A	A	A	A	A	B	A	B	B	A	B	A	B	B	A	C	A	A	B	B	A
664	3B	60466	IWB60466	RAC875_c775_1135	83.3	B	B	A	B	B	A	A	A	A	B	A	B	A	B	B	A	A	B	B	B	A	B	B	A	A	A	A	A	B	A	B	B	A	B	A	B	B	A	C	A	A	B	B	A
665	3B	79160	IWA5178	wsnp_Ex_rep_c110375_92775402	83.6	B	B	A	B	B	A	A	A	A	B	A	B	A	B	B	A	A	B	B	B	A	B	B	A	A	A	A	A	B	A	B	B	A	B	A	B	B	B	C	A	A	B	B	A
666	3B	69308	IWB69308	Tdurum_contig27495_111	83.8	B	B	A	B	B	A	A	A	A	B	A	B	A	B	B	A	A	B	B	B	A	B	B	A	A	A	A	A	B	A	B	B	A	B	A	B	B	B	C	A	A	B	B	A
667	3B	32559	IWB32559	GENE-1617_188	84.1	B	B	A	B	B	A	A	A	A	B	A	B	A	B	B	A	A	B	B	B	A	B	B	A	A	A	A	A	B	A	B	B	A	B	A	B	B	B	C	A	A	B	B	A
668	3B	36233	IWB36233	IACX7741	84.4	B	B	A	B	B	A	A	A	A	B	A	B	A	B	B	A	A	B	B	B	A	B	B	A	A	A	A	A	B	A	B	B	A	B	A	B	B	B	C	A	A	B	B	A
669	3B	71476	IWB71476	Tdurum_contig44013_74	84.6	B	B	A	B	B	A	A	A	A	B	A	B	A	B	B	A	A	B	B	B	A	B	B	C	A	A	A	A	B	A	B	B	A	B	A	B	B	B	C	A	A	B	B	A
670	3B	13369	IWB13369	CAP12_c3423_116	85.2	B	B	A	B	B	A	A	A	A	B	A	B	A	B	B	A	A	B	B	B	A	B	B	B	A	A	A	A	B	A	B	B	A	B	A	B	B	B	C	A	A	B	B	C
671	3B	1014	IWB1014	BobWhite_c17191_297	85.5	B	B	A	B	B	A	A	A	A	B	A	B	A	B	B	A	A	B	B	B	A	B	B	B	A	A	A	A	B	A	B	B	A	B	A	B	B	B	C	A	A	B	B	A
672	3B	63113	IWB63113	RAC875_rep_c77684_470	85.7	B	B	A	B	B	A	A	A	A	B	A	B	A	B	B	A	A	B	B	B	A	B	B	B	A	A	A	A	B	A	B	B	A	B	A	B	B	B	C	A	A	B	B	A
673	3B	8029	IWB8029	BS00035878_51	86	B	B	A	B	B	A	A	A	A	B	A	B	A	B	B	A	A	B	B	B	A	B	B	B	A	A	A	A	B	A	B	B	A	B	A	B	B	B	B	A	A	B	B	A
674	3B	58033	IWB58033	RAC875_c44290_511	86.6	B	B	A	B	B	A	A	A	A	B	A	B	A	B	B	A	A	B	B	B	A	B	B	B	A	A	A	A	B	A	B	B	A	B	A	B	B	B	C	A	A	B	B	A
675	3B	80565	IWA7131	wsnp_Ku_c50833_56310020	87.1	B	B	A	A	B	A	A	A	A	B	A	B	A	B	B	A	A	A	B	B	A	B	B	B	A	A	A	A	B	A	B	B	A	B	A	B	B	B	C	A	A	B	B	A
676	3B	79148	IWA5165	wsnp_Ex_rep_c108114_91468537	87.4	B	B	A	A	B	A	A	A	A	B	A	B	A	B	B	A	A	A	B	B	A	B	B	B	A	A	A	A	B	A	B	B	A	B	A	B	B	B	B	A	A	B	B	A
677	3B	42741	IWB42741	Kukri_c2306_333	88.2	B	B	A	A	B	A	A	A	A	B	A	B	A	B	B	A	A	A	B	B	A	B	B	A	A	A	A	A	B	A	B	B	A	B	A	B	B	B	B	A	A	B	B	A
678	3B	9451	IWB9451	BS00065107_51	89.3	B	B	A	A	B	A	A	A	A	B	A	B	A	B	B	A	A	A	B	A	A	B	B	A	A	A	A	A	B	A	B	B	A	B	A	B	B	B	B	A	A	B	B	A
679	3B	76813	IWA2124	wsnp_Ex_c16378_24870688	89.6	B	B	A	A	B	A	A	A	A	B	A	B	A	B	B	A	A	A	B	A	A	B	B	A	A	A	A	A	B	A	B	B	A	B	A	B	B	B	B	A	A	B	B	A
680	3B	54327	IWB54327	RAC875_c16628_500	89.8	B	B	A	A	B	A	A	A	A	B	A	B	A	B	B	A	A	A	B	A	A	B	B	A	A	A	A	A	B	A	B	B	A	B	A	B	B	B	C	A	A	B	B	A
681	3B	76181	IWA1334	wsnp_Ex_c10499_17163260	90.1	B	B	A	A	B	A	A	A	A	B	A	B	A	B	A	A	A	A	B	A	A	B	B	A	A	A	A	A	B	A	B	B	A	B	A	B	B	B	C	A	A	B	B	A
682	3B	36290	IWB36290	IACX8336	90.4	B	B	A	A	B	A	A	A	A	B	A	B	A	B	A	A	A	A	B	A	A	B	B	A	A	A	A	A	B	A	B	B	A	B	A	B	B	B	B	A	A	B	B	A
683	3B	78969	IWA4942	wsnp_Ex_c9594_15882022	90.6	B	B	A	A	B	A	A	A	A	B	A	B	A	B	A	A	A	A	B	A	A	B	B	A	A	A	A	A	B	A	B	B	A	B	A	B	B	B	B	A	A	B	B	A
684	3B	65507	IWB65507	TA002179-0963	90.9	B	B	A	A	B	A	A	A	A	B	A	B	A	B	A	A	A	A	B	A	A	B	B	C	A	A	A	A	B	A	B	B	A	B	A	B	B	B	C	A	A	B	B	A
685	3B	2290	IWB2290	BobWhite_c29647_243	91.2	B	B	A	A	B	A	A	A	A	B	A	B	A	B	A	A	A	A	B	A	A	B	B	A	A	A	A	A	B	A	B	B	A	B	A	B	B	B	B	A	A	B	B	A
686	3B	11839	IWB11839	BS00093892_51	91.5	B	C	A	A	B	A	A	A	A	B	A	B	A	B	A	A	A	A	B	A	A	B	B	A	A	A	A	A	B	A	B	B	A	B	A	C	B	B	B	A	A	B	B	A
687	3B	54174	IWB54174	RAC875_c15889_109	92	B	B	A	A	B	A	A	A	A	B	A	B	A	B	A	A	A	A	B	A	A	B	B	A	A	A	A	A	B	A	B	B	A	B	A	B	B	A	B	A	A	B	B	A
688	3B	35427	IWB35427	IAAV8080	92.3	B	B	A	A	B	A	A	A	A	B	A	B	A	B	A	A	A	A	B	C	A	B	B	A	A	A	A	A	B	A	B	B	A	B	A	B	B	C	B	A	A	B	B	A
689	3B	1639	IWB1639	BobWhite_c22794_111	92.6	B	B	A	A	B	A	A	A	A	B	A	B	A	B	A	A	A	A	B	A	A	B	B	A	A	A	A	A	B	A	B	B	A	B	A	B	B	C	C	A	A	B	B	A
690	3B	79678	IWA5871	wsnp_JD_c16245_15468917	93.4	B	B	A	A	B	A	A	A	A	B	A	B	A	B	A	A	A	A	B	A	A	B	B	A	A	A	A	A	B	A	B	B	A	B	A	B	B	C	C	A	A	B	B	B
691	3B	12192	IWB12192	BS00102641_51	93.7	B	B	A	A	B	A	A	A	A	B	A	B	A	B	A	A	A	A	B	A	A	B	B	A	A	A	A	A	B	A	B	B	A	B	A	B	B	C	B	A	A	B	B	B
692	3B	6203	IWB6203	BS00010316_51	93.9	B	B	A	A	B	A	A	A	A	B	A	B	A	B	A	A	A	A	B	A	A	B	B	A	A	A	A	A	B	A	B	B	A	B	A	B	B	C	B	A	A	B	B	B
693	3B	76498	IWA1733	wsnp_Ex_c13154_20785032	94.5	B	B	A	A	B	A	A	A	A	B	A	B	A	B	A	A	A	A	B	A	A	B	B	A	A	A	A	A	B	A	B	B	A	B	A	B	B	C	B	A	A	B	B	B
694	3B	24723	IWB24723	Excalibur_c2850_126	94.7	B	B	A	A	B	A	A	A	A	B	A	B	A	B	A	A	A	A	B	A	A	B	B	A	A	A	A	A	B	A	B	B	A	B	A	B	B	C	B	A	A	B	B	B
695	3B	25571	IWB25571	Excalibur_c35203_334	97	B	B	A	A	B	A	B	A	A	B	A	B	A	B	A	A	A	A	B	A	A	B	B	A	A	A	A	A	B	A	B	B	A	B	B	B	B	C	B	A	A	B	B	B
696	3B	67684	IWB67684	Tdurum_contig12643_514	97.3	B	B	A	A	B	A	B	A	A	B	A	B	A	B	A	A	A	A	B	A	A	B	B	A	A	A	A	A	B	A	B	B	A	B	B	B	B	C	B	A	A	B	B	B
697	3B	47171	IWB47171	Kukri_c64639_120	97.8	B	B	A	A	B	A	B	A	A	B	A	B	A	B	A	A	A	A	B	A	A	B	B	A	A	A	A	A	B	A	B	B	A	B	B	B	B	C	C	A	A	B	B	B
698	3B	51903	IWB51903	Ra_c35_3184	98.4	B	B	A	A	B	A	B	A	A	B	A	B	A	B	A	A	A	A	B	A	A	B	B	A	A	A	A	A	B	A	B	B	A	B	B	B	B	C	C	A	A	B	B	B
699	3B	8244	IWB8244	BS00040742_51	98.9	B	B	A	A	B	A	B	A	A	B	A	B	A	B	A	A	B	A	B	A	A	B	B	A	A	A	A	A	B	A	B	B	A	B	B	B	B	C	B	A	A	B	B	B
700	3B	45104	IWB45104	Kukri_c41129_344	100.4	B	B	A	A	B	A	B	A	A	B	A	B	A	B	A	A	B	A	B	A	A	B	B	A	A	A	A	A	B	A	B	B	A	B	B	B	B	A	B	A	A	B	B	B
701	3B	53593	IWB53593	RAC875_c12801_410	100.9	B	B	A	A	B	A	B	A	A	B	A	B	A	B	A	A	B	A	B	B	A	B	B	A	A	A	A	A	B	A	B	B	A	B	B	B	B	A	C	A	A	B	B	B
702	3B	73555	IWB73555	Tdurum_contig82231_204	101.2	B	B	A	A	B	A	B	A	A	B	A	B	A	B	A	A	B	A	B	B	A	B	B	C	A	A	A	A	B	A	B	B	A	B	B	B	B	A	B	A	A	B	B	B
703	3B	31458	IWB31458	Excalibur_rep_c97324_623	102	B	B	A	A	B	A	B	A	A	B	A	B	A	B	A	A	B	A	B	B	A	B	B	A	A	A	A	A	B	A	B	B	A	B	B	B	B	A	C	A	A	B	B	B
704	3B	23681	IWB23681	Excalibur_c21708_555	102.3	B	B	A	A	B	A	B	A	A	B	A	B	A	B	A	A	B	A	B	B	A	B	B	A	A	A	A	A	B	A	B	B	A	B	B	B	B	A	B	A	A	B	B	B
705	3B	8730	IWB8730	BS00057988_51	102.8	B	B	A	A	B	A	B	A	A	B	A	B	A	A	A	A	B	A	B	B	A	B	B	A	A	A	A	A	C	A	B	B	A	B	B	B	B	A	B	A	A	B	B	B
706	3B	71664	IWB71664	Tdurum_contig46030_580	104	B	B	A	A	B	A	B	A	A	B	A	B	A	A	A	A	B	A	B	B	A	B	B	A	A	A	A	A	B	A	B	B	A	B	B	B	B	A	C	A	A	B	B	B
707	3B	48982	IWB48982	Kukri_rep_c104399_156	104.8	B	B	A	A	B	A	B	A	A	B	A	B	A	A	A	A	B	A	B	B	A	B	B	A	A	A	A	A	B	A	B	B	A	B	B	B	B	A	B	A	A	B	B	B
708	3B	44099	IWB44099	Kukri_c3243_1065	105.1	B	B	A	A	B	A	B	A	A	B	A	B	A	A	A	A	B	A	B	B	A	B	B	A	A	A	A	A	B	A	B	B	A	B	B	B	B	A	B	A	A	B	B	B
709	3B	10030	IWB10030	BS00067355_51	109.3	A	B	A	A	B	A	A	A	A	B	A	B	A	A	A	A	B	A	B	B	A	B	B	A	A	A	A	A	B	A	B	B	A	B	B	A	B	A	C	A	C	B	B	B
710	3B	7609	IWB7609	BS00026064_51	114.9	A	C	A	A	B	A	A	A	A	B	A	B	A	A	A	A	B	A	A	B	A	B	B	A	A	A	A	A	B	A	B	B	A	B	B	A	B	A	C	A	C	B	B	B
711	3B	77805	IWA3454	wsnp_Ex_c33879_42293206	117	A	C	A	A	B	B	A	A	A	B	A	B	B	A	B	A	B	A	A	B	A	B	B	A	C	A	A	A	B	A	B	B	A	B	B	C	B	A	C	A	C	B	B	B
712	3B	75889	IWA785	wsnp_CAP11_c59_99317	117.2	A	C	A	A	B	B	A	A	B	B	A	B	B	A	B	A	B	A	A	B	A	B	B	A	C	A	A	A	B	A	B	B	A	B	B	A	B	A	A	A	C	B	B	B
713	3B	66054	IWB66054	TA006103-0916	117.5	A	C	A	A	B	B	A	A	B	B	A	B	B	A	B	A	B	A	A	B	A	B	B	A	C	A	A	A	C	A	B	B	A	B	B	A	B	A	A	A	C	B	B	B
714	3B	10390	IWB10390	BS00069273_51	117.8	A	C	A	A	B	B	A	A	B	B	A	B	B	A	B	A	B	A	A	B	A	B	B	A	C	A	A	A	B	A	B	B	A	B	B	A	B	A	A	A	B	B	B	B
715	3B	9115	IWB9115	BS00063711_51	121.4	A	A	A	B	B	B	A	A	B	B	A	B	B	A	B	A	B	A	A	B	A	B	B	A	A	A	A	A	B	A	B	B	B	B	B	A	B	A	A	A	B	B	B	B
716	3B	32587	IWB32587	GENE-1662_108	121.7	A	A	A	B	B	B	A	A	B	B	A	B	B	A	B	A	B	A	A	B	A	B	B	A	A	A	A	A	B	A	B	B	B	B	B	A	B	A	C	A	B	B	B	B
717	3B	26933	IWB26933	Excalibur_c4821_1561	123.4	A	A	A	B	B	A	A	A	B	B	A	B	B	A	B	A	B	A	A	B	A	B	B	A	A	A	A	C	B	A	B	B	B	B	B	C	B	A	C	A	B	B	B	B
718	3B	14554	IWB14554	CAP8_c1657_183	129.5	A	A	A	B	A	B	A	A	B	B	A	B	B	A	B	A	B	A	A	B	A	B	B	B	A	A	A	A	B	A	B	B	B	A	B	B	B	A	C	A	B	B	B	B
719	3B	73988	IWB73988	Tdurum_contig9738_262	130.7	A	A	A	B	A	B	A	B	B	B	A	B	B	A	B	C	B	A	A	B	A	B	B	B	A	A	A	A	B	A	B	B	B	A	B	B	B	A	A	A	B	B	B	B
720	3B	67339	IWB67339	Tdurum_contig11881_425	133.9	A	A	A	B	A	B	A	B	B	B	A	A	B	A	B	A	B	A	B	B	A	B	B	B	A	A	A	A	B	A	B	B	B	A	B	B	B	A	B	B	B	B	B	B
721	3B	44195	IWB44195	Kukri_c33386_112	135.9	A	A	A	B	A	B	B	B	B	B	A	A	B	A	B	A	B	A	B	B	A	B	B	B	A	A	A	A	B	A	B	B	B	A	B	B	B	A	B	B	B	B	B	B
722	3B	70167	IWB70167	Tdurum_contig31097_254	136.2	A	A	A	B	A	B	B	B	B	B	A	A	B	A	B	A	B	A	B	B	A	B	B	B	A	A	A	A	B	A	B	B	B	A	B	B	B	A	B	B	B	B	B	B
723	3B	1858	IWB1858	BobWhite_c2486_239	136.5	A	A	A	B	A	B	B	B	B	B	A	A	B	A	B	A	B	A	B	B	A	B	B	B	A	A	A	A	B	A	B	B	B	A	B	B	B	A	C	B	B	B	B	B
724	3B	71781	IWB71781	Tdurum_contig47292_302	136.8	A	A	A	B	A	B	B	B	B	B	A	A	B	A	B	A	B	A	B	B	A	B	B	B	A	A	A	A	B	A	B	B	B	A	B	B	B	A	C	B	B	B	B	B
725	3B	29374	IWB29374	Excalibur_c91987_69	138.8	A	A	A	B	A	B	B	B	B	B	A	A	B	A	B	A	B	A	A	B	A	B	B	B	A	A	A	A	B	A	A	B	B	A	B	B	B	A	A	B	A	B	B	B
726	3B	8949	IWB8949	BS00062914_51	139.4	A	A	A	B	A	B	B	B	B	B	A	A	B	A	B	A	B	A	A	B	A	B	B	B	A	A	A	A	B	A	A	B	B	A	B	B	B	A	C	B	A	B	B	B
727	3B	53720	IWB53720	RAC875_c13425_393	139.7	A	A	A	B	A	B	B	B	B	B	A	A	B	A	B	A	B	A	A	B	A	B	B	B	A	A	A	A	B	A	A	B	B	A	B	B	B	A	B	B	A	B	B	B
728	3B	10839	IWB10839	BS00075879_51	139.9	A	A	A	B	A	B	B	B	B	B	A	A	B	A	B	A	B	A	A	B	A	B	B	B	A	A	A	A	A	A	A	B	B	A	B	B	B	A	B	B	A	B	B	B
729	3B	32732	IWB32732	GENE-1925_447	140.2	A	A	A	B	A	B	B	B	B	B	A	A	B	A	B	A	B	A	A	B	A	B	B	B	A	A	A	A	A	A	A	B	B	A	B	B	B	A	B	B	A	B	B	B
730	3B	43749	IWB43749	Kukri_c29615_377	140.5	A	A	A	B	A	B	B	B	B	B	A	A	B	A	B	A	B	A	A	B	A	B	B	B	A	A	A	A	A	A	A	B	B	A	B	B	B	A	B	B	A	B	B	B
731	3B	6094	IWB6094	BS00009671_51	140.8	A	A	A	B	A	B	B	B	B	B	A	A	B	A	B	A	B	C	A	B	A	B	B	B	C	C	A	A	A	A	A	B	B	A	B	B	B	A	B	B	A	B	B	B
732	3B	4890	IWB4890	BobWhite_rep_c50492_500	142.6	A	A	A	B	B	B	B	B	B	B	A	A	B	A	B	A	B	A	A	A	A	B	B	B	A	A	A	A	A	B	A	A	B	A	B	B	B	A	B	B	A	B	B	B
733	3B	34409	IWB34409	IAAV1595	142.9	A	A	A	B	B	B	B	B	B	B	A	A	B	A	B	A	B	A	A	A	A	B	B	B	A	A	A	A	A	B	A	A	B	A	B	B	B	A	C	B	A	B	B	B
734	3B	11520	IWB11520	BS00087694_51	145.2	A	A	A	B	B	B	B	B	B	B	A	A	B	A	B	A	B	C	A	A	A	B	B	B	A	A	A	A	A	B	A	A	B	A	B	B	B	A	C	B	A	B	B	B
735	3D	48159	IWB48159	Kukri_c8870_721	0	B	B	A	B	B	A	A	A	B	A	A	B	A	A	A	B	A	A	A	A	A	A	A	C	A	A	A	A	A	B	A	B	A	A	A	A	A	B	A	B	A	B	A	B
736	3D	42836	IWB42836	Kukri_c23591_522	0.6	B	B	A	B	B	A	A	A	B	A	A	B	A	A	A	B	A	A	A	A	A	A	A	C	A	A	A	A	A	B	A	B	A	A	A	A	A	B	A	B	A	B	A	A
737	3D	8818	IWB8818	BS00060773_51	2.3	B	B	A	B	B	A	A	A	B	A	A	B	A	A	A	C	A	A	A	A	A	A	A	A	A	B	A	A	A	B	A	B	A	A	A	A	A	B	B	B	A	B	A	A
738	3D	64234	IWB64234	RFL_Contig3158_598	4.3	B	B	A	B	B	A	A	A	B	A	A	B	A	A	A	B	A	A	A	A	A	A	A	A	A	B	A	A	A	B	A	B	A	C	A	A	A	B	B	B	A	B	A	A
739	3D	42979	IWB42979	Kukri_c24488_1603	5.1	B	B	A	B	B	A	A	A	B	A	A	B	A	A	A	B	A	A	A	A	A	A	A	C	A	B	A	A	A	B	A	B	A	A	A	A	A	B	B	B	A	B	A	A
740	3D	40813	IWB40813	Kukri_c12401_301	8.6	B	A	A	B	B	A	A	A	B	A	A	A	A	A	A	B	A	A	A	A	A	A	A	A	A	B	A	B	A	B	A	B	A	A	A	A	A	B	B	B	B	A	A	A
741	3D	17932	IWB17932	D_GA8KES402JX54D_322	11.5	B	A	B	B	B	A	A	A	B	A	A	A	A	B	A	B	A	A	A	A	A	A	A	C	A	B	A	B	A	B	A	B	A	A	A	A	A	B	B	B	B	A	A	A
742	3D	37161	IWB37161	JD_c20427_248	18.1	B	B	B	A	B	B	A	B	B	B	A	A	A	B	A	B	A	A	A	A	A	A	A	C	A	B	A	B	A	B	A	B	A	A	A	A	A	B	B	B	B	A	A	A
743	3D	8376	IWB8376	BS00044751_51	25.2	B	B	B	A	B	B	A	B	B	B	A	A	A	B	A	B	A	A	A	A	A	A	A	C	A	A	B	C	B	B	A	B	A	B	A	A	A	B	B	B	B	A	A	A
744	3D	66028	IWB66028	TA005883-0675	26.4	C	B	B	A	B	B	A	B	B	B	A	A	A	B	A	B	A	A	B	A	A	A	A	A	A	A	A	B	B	B	A	B	A	B	A	A	A	B	B	B	B	A	A	A
745	3D	32647	IWB32647	GENE-1771_89	26.9	C	B	B	A	B	B	A	B	B	B	A	A	A	B	A	B	A	A	B	A	A	A	A	C	A	A	A	B	B	B	A	B	A	B	A	A	A	B	B	B	B	A	A	A
746	3D	14604	IWB14604	CAP8_c2305_193	27.2	C	B	B	A	B	B	A	B	B	B	A	A	A	B	A	B	A	A	B	A	A	A	A	B	A	A	A	B	B	B	A	B	A	B	A	A	A	B	B	B	B	A	A	A
747	3D	47841	IWB47841	Kukri_c80364_374	28.1	C	B	B	A	B	B	A	B	B	B	A	B	A	B	A	B	A	A	B	A	A	A	A	B	A	A	A	B	B	B	A	B	A	B	A	A	A	B	B	B	B	A	A	A
748	3D	76042	IWA1082	wsnp_CAP7_c3519_1643682	28.6	C	B	B	A	B	B	A	B	B	B	A	B	A	B	A	B	A	A	B	A	A	A	A	B	A	A	A	B	B	B	A	B	A	B	A	A	A	B	B	B	B	A	A	A
749	3D	18689	IWB18689	D_GBUVHFX02G2BTK_399	42.7	B	B	A	A	B	B	B	B	B	B	A	B	A	A	A	B	B	A	B	A	B	A	A	A	B	A	B	B	A	B	A	B	B	B	B	B	A	B	B	A	B	B	A	A
750	3D	44143	IWB44143	Kukri_c32857_1101	43.2	B	B	A	A	B	B	B	B	B	B	A	B	A	A	A	B	B	A	B	A	B	A	A	A	B	A	B	B	A	B	A	B	B	B	B	B	A	B	B	A	B	B	A	A
751	3D	76936	IWA2293	wsnp_Ex_c18250_27065775	49.5	B	B	A	A	B	B	B	B	A	B	B	B	A	A	A	B	B	B	B	A	B	C	A	A	B	A	B	B	A	B	A	A	B	B	B	B	A	B	B	A	C	B	A	A
752	3D	30686	IWB30686	Excalibur_rep_c114833_645	49.7	B	B	A	A	B	B	B	B	A	B	B	B	A	A	A	B	B	B	B	A	B	C	A	A	B	A	B	B	A	B	A	A	B	B	B	B	A	B	B	A	C	B	A	A
753	3D	34616	IWB34616	IAAV2827	50	B	B	A	A	B	B	B	B	A	B	B	B	A	A	A	B	B	B	B	A	B	C	A	A	B	A	B	B	A	B	A	A	B	B	B	B	A	B	B	A	C	B	A	A
754	3D	15880	IWB15880	D_contig17622_230	51.4	B	B	A	A	B	B	B	B	A	B	B	B	A	A	A	B	B	B	B	A	B	C	A	A	B	A	B	B	A	B	A	A	B	B	B	B	A	B	B	A	C	B	A	A
755	3D	17892	IWB17892	D_GA8KES402HQTPI_166	51.7	B	B	A	A	B	B	B	B	A	B	B	B	A	A	A	B	B	B	B	A	B	C	A	A	B	A	B	B	A	B	A	A	B	B	B	B	A	B	B	A	C	B	A	A
756	3D	18579	IWB18579	D_GBUVHFX01BFAWD_100	54.7	B	B	A	A	B	B	B	B	A	B	B	B	A	A	B	B	B	B	B	A	B	C	A	A	B	A	B	B	A	B	A	A	B	B	B	B	A	B	A	A	C	B	A	A
757	3D	52061	IWB52061	Ra_c4231_465	54.9	B	B	A	A	B	B	B	B	A	B	A	B	A	A	B	B	B	B	B	A	B	C	A	A	B	A	B	B	A	B	A	A	B	B	B	B	A	B	A	A	C	B	A	A
758	3D	50128	IWB50128	Kukri_rep_c71523_81	56.1	B	B	A	A	B	B	B	B	A	B	A	B	A	A	B	B	B	B	A	A	B	B	A	A	B	A	B	B	A	B	A	A	B	B	B	B	A	B	A	A	C	B	A	A
759	3D	34348	IWB34348	IAAV1270	58.7	A	B	A	A	B	B	B	B	A	B	A	B	A	A	B	B	B	B	A	A	B	B	A	A	B	A	B	B	A	B	A	A	B	B	B	B	A	B	A	A	C	B	A	A
760	3D	24655	IWB24655	Excalibur_c27999_500	59	A	B	A	A	B	B	B	B	A	B	A	B	A	A	B	B	B	B	A	A	B	B	A	A	B	A	B	B	A	B	A	A	B	B	B	B	A	B	A	A	C	B	A	A
761	3D	65514	IWB65514	TA002219-1181	61.9	A	B	A	B	B	B	B	B	A	B	A	B	A	A	B	B	B	B	A	A	B	B	A	A	B	A	A	B	A	B	A	A	B	B	B	B	A	B	A	A	C	B	A	A
762	3D	44854	IWB44854	Kukri_c38868_427	62.4	A	B	A	B	B	B	B	B	A	B	A	B	A	A	B	B	B	B	A	A	B	A	A	A	B	A	A	B	A	B	A	A	B	B	B	B	A	B	A	A	C	A	A	A
763	3D	55287	IWB55287	RAC875_c22054_1936	66	A	B	A	B	B	B	A	B	B	B	A	B	A	A	B	B	B	B	A	A	B	A	B	A	B	A	A	B	A	B	A	A	B	B	B	B	A	B	A	A	C	A	A	A
764	3D	18741	IWB18741	D_GBUVHFX02JH8X4_174	66.8	A	B	A	B	B	B	A	B	B	B	A	B	A	A	B	B	B	B	A	A	B	A	B	A	B	A	A	B	A	B	A	A	B	B	B	B	A	B	C	A	B	A	A	A
765	3D	37971	IWB37971	JG_c34_270	68.3	A	B	A	B	B	B	A	B	B	B	A	B	A	A	B	B	B	B	A	A	B	A	B	A	B	A	A	B	A	B	A	A	B	B	B	B	A	B	B	A	A	A	A	A
766	3D	63677	IWB63677	RFL_Contig1537_638	70.3	A	B	A	B	B	B	A	B	B	B	A	B	A	A	B	B	B	B	A	A	B	A	B	A	A	A	A	B	A	B	A	A	B	B	B	B	A	B	B	A	A	A	A	A
767	3D	18874	IWB18874	D_GCE8AKX02GSCVR_40	71.7	A	B	A	B	B	B	A	B	B	B	A	B	A	A	B	B	B	B	A	A	B	A	B	A	A	A	A	B	A	B	A	A	B	B	B	B	A	B	B	A	A	A	A	A
768	3D	30266	IWB30266	Excalibur_rep_c107481_157	75.2	A	A	A	B	B	B	A	B	B	B	A	B	A	A	B	B	B	B	A	A	B	A	B	A	A	A	A	B	A	B	A	B	B	B	B	B	A	B	B	A	A	A	A	A
769	3D	50525	IWB50525	Kukri_rep_c94512_55	75.5	A	A	A	B	B	B	A	B	B	B	A	B	A	A	B	B	B	B	A	A	B	A	B	A	A	A	A	B	A	B	A	B	B	B	B	B	A	B	C	A	A	A	A	A
770	3D	81576	IWA8610	wsnp_RFL_Contig463_5510887	75.8	A	A	A	B	B	B	A	B	B	B	A	B	A	A	B	B	B	B	A	A	B	A	B	A	A	A	A	B	A	B	A	B	B	B	B	B	A	B	B	A	A	A	A	A
771	3D	19217	IWB19217	D_GDRF1KQ02GV96X_70	76	A	A	A	B	B	B	A	B	B	B	A	B	A	A	B	B	B	B	A	A	B	A	B	A	A	A	A	B	A	B	A	B	B	B	B	B	A	B	B	A	C	A	A	A
772	3D	18414	IWB18414	D_GBF1XID01ELEX6_151	77.2	A	A	A	B	B	B	A	B	B	B	A	B	A	A	B	B	B	B	A	A	B	A	B	A	A	A	A	B	A	B	A	B	B	B	B	B	A	B	B	A	A	A	A	A
773	3D	61291	IWB61291	RAC875_c99415_708	78.3	A	A	A	B	B	B	A	B	B	B	A	A	A	A	B	B	B	B	A	B	B	A	B	A	A	A	A	B	A	B	A	B	B	B	B	A	A	B	B	A	A	A	A	A
774	3D	23678	IWB23678	Excalibur_c21708_291	82.2	A	A	A	B	B	B	A	B	B	B	A	A	A	A	B	B	B	B	A	B	B	A	B	A	B	A	A	B	A	B	A	A	B	B	B	A	C	B	B	A	A	A	A	A
775	3D	13317	IWB13317	CAP12_c2615_128	87.8	A	B	A	B	B	B	A	B	B	B	A	A	A	A	B	B	B	A	A	B	B	A	B	A	B	A	A	B	A	B	A	A	B	A	B	A	C	B	B	B	A	A	A	A
776	3D	1418	IWB1418	BobWhite_c20641_267	96.3	B	A	A	B	B	B	A	B	A	A	A	A	A	A	A	A	B	A	A	B	B	A	B	A	A	A	B	A	A	B	A	A	B	A	B	A	A	B	B	B	A	A	A	B
777	3D	3090	IWB3090	BobWhite_c40017_353	107.8	B	A	B	B	B	B	A	B	A	A	A	A	A	B	A	A	A	B	A	A	B	A	B	A	B	A	B	A	B	B	A	A	B	A	B	B	A	B	B	B	B	A	A	B
778	3D	16791	IWB16791	D_contig39749_653	108.4	B	A	B	B	B	B	A	B	A	A	A	A	A	B	A	A	A	B	A	A	B	A	B	A	B	A	B	A	B	B	A	A	B	A	B	B	A	B	B	B	B	A	A	B
779	3D	16202	IWB16202	D_contig24884_83	109.5	B	A	C	B	B	B	A	B	A	A	A	A	A	B	A	A	A	B	A	A	B	A	B	A	B	A	A	A	B	B	A	A	B	A	B	B	A	B	C	A	B	A	A	B
780	3D	16687	IWB16687	D_contig36392_363	110.6	B	A	B	B	B	B	A	B	A	A	A	A	A	B	A	A	A	B	A	A	B	A	B	A	B	A	A	A	B	B	A	A	B	A	B	B	A	B	B	A	B	A	A	B
781	3D	36571	IWB36571	Jagger_c3839_60	111.7	B	A	B	B	B	B	A	B	A	A	B	A	A	B	A	A	A	B	A	A	B	A	B	A	B	A	A	A	B	B	A	A	B	A	B	B	B	B	B	A	B	A	A	B
782	3D	18421	IWB18421	D_GBF1XID01ETBRB_172	113.4	B	A	B	B	B	B	A	A	A	B	B	A	A	B	A	A	A	B	A	A	B	A	B	A	B	A	A	B	B	B	A	A	B	A	B	B	B	B	B	A	B	A	A	B
783	3D	42714	IWB42714	Kukri_c2289_635	114	B	A	B	B	B	B	A	A	A	B	B	A	A	B	A	A	A	B	A	A	B	A	B	A	B	A	A	B	B	B	A	A	B	A	B	B	B	B	C	A	B	A	A	B
784	3D	19457	IWB19457	D_GDS7LZN02IIERD_132	116.9	B	A	B	A	B	B	A	A	A	B	B	A	A	B	A	A	A	B	A	A	B	A	B	A	A	A	A	B	B	A	A	A	B	A	B	B	B	B	B	C	B	A	A	B
785	3D	4163	IWB4163	BobWhite_c6420_284	117.2	B	A	B	A	B	B	A	A	B	B	B	A	A	B	A	A	A	B	A	A	B	A	B	A	A	A	A	B	B	A	A	A	B	A	B	B	B	B	B	A	B	A	A	B
786	3D	16679	IWB16679	D_contig36160_443	117.7	B	A	B	B	B	B	A	A	B	B	B	A	A	B	A	A	A	B	A	A	B	A	B	A	A	A	A	B	B	A	A	A	B	A	B	B	B	B	C	A	B	A	A	B
787	3D	45351	IWB45351	Kukri_c43464_89	118	B	A	B	B	B	B	A	A	B	B	B	A	A	B	A	A	A	B	A	A	B	A	B	A	A	A	A	B	B	A	A	A	B	A	B	B	B	B	B	A	B	A	A	B
788	3D	15087	IWB15087	CAP8_rep_c9749_188	119.1	B	A	B	B	B	B	A	A	B	B	B	B	A	B	A	A	A	B	A	A	B	A	B	A	A	A	A	B	B	A	A	A	B	A	B	B	B	B	B	A	B	A	A	B
789	3D	7920	IWB7920	BS00033229_51	119.3	B	A	B	B	B	B	A	A	B	B	B	B	A	B	A	A	A	B	A	A	B	A	B	A	A	A	A	B	B	A	A	A	B	A	B	B	B	B	B	A	B	A	A	B
790	3D	22998	IWB22998	Excalibur_c17654_351	119.6	B	A	B	B	B	B	A	A	B	B	A	B	A	B	A	A	A	B	A	A	B	A	B	A	A	A	A	B	B	A	A	A	B	A	B	B	B	B	B	A	B	A	A	B
791	3D	5822	IWB5822	BS00003119_51	119.9	B	A	B	B	B	B	A	A	B	B	A	B	A	B	A	A	A	B	B	A	B	A	B	A	A	A	A	B	B	A	A	A	B	A	B	B	B	B	B	A	B	A	A	B
792	3D	10989	IWB10989	BS00078098_51	120.2	B	A	B	B	B	B	A	A	B	B	A	B	A	B	A	A	A	B	B	A	B	A	B	A	A	A	A	B	B	A	A	A	B	A	B	B	B	B	B	A	B	A	A	B
793	4A	37183	IWB37183	JD_c21248_511	0	A	B	A	A	B	A	A	B	B	A	B	B	B	B	A	B	B	A	A	A	A	A	B	A	A	A	A	B	B	A	B	A	B	A	B	B	B	B	A	A	C	A	A	A
794	4A	19265	IWB19265	D_GDRF1KQ02JZS7N_128	0.3	A	B	A	A	B	A	A	B	A	A	B	B	B	B	A	B	B	A	A	A	A	A	B	A	A	A	A	B	B	A	B	A	B	A	B	C	B	B	A	A	C	A	A	A
795	4A	67708	IWB67708	Tdurum_contig12696_528	6.3	A	B	A	A	B	A	A	A	A	A	A	B	B	B	A	B	B	A	A	A	A	A	B	A	A	A	A	B	B	A	B	A	B	A	A	B	B	A	A	A	A	A	A	A
796	4A	68749	IWB68749	Tdurum_contig1868_249	13.2	A	A	A	A	B	A	A	A	A	A	A	B	B	B	A	B	B	A	A	A	B	A	B	A	A	A	A	B	B	A	A	A	B	A	A	B	B	A	C	A	C	A	A	A
797	4A	72445	IWB72445	Tdurum_contig55438_182	14.1	A	A	A	A	B	A	B	A	A	A	A	B	B	B	A	B	B	A	A	A	B	A	B	A	A	A	A	B	B	A	A	A	B	A	A	C	B	A	B	A	C	A	A	A
798	4A	52625	IWB52625	Ra_c74035_586	18	A	A	C	A	B	A	B	A	A	A	A	B	B	B	A	B	B	A	A	B	B	A	B	C	A	A	A	B	B	A	A	A	B	A	A	A	B	A	B	A	C	A	A	A
799	4A	21402	IWB21402	Ex_c883_2618	19.1	A	A	C	A	B	A	B	A	A	A	A	B	B	B	A	B	B	A	A	B	B	A	B	A	A	A	A	B	B	A	A	A	B	A	A	A	B	A	B	A	C	A	A	A
800	4A	8056	IWB8056	BS00036493_51	19.4	A	A	C	A	B	A	B	A	A	A	A	B	B	B	A	B	B	A	A	C	B	A	B	A	A	A	A	B	B	A	A	A	C	A	A	A	B	A	B	A	C	A	A	A
801	4A	56757	IWB56757	RAC875_c32657_295	25.3	A	A	B	A	A	B	A	A	A	A	A	B	B	B	A	B	B	A	A	B	B	A	B	A	A	A	B	B	B	A	A	B	B	A	A	B	B	A	B	A	B	A	B	A
802	4A	39336	IWB39336	Ku_c3891_336	25.6	A	A	B	A	A	B	A	A	A	A	A	B	A	B	A	B	B	A	A	B	B	A	B	A	A	A	B	B	B	A	A	B	B	A	A	B	B	A	B	A	B	A	B	A
803	4A	26155	IWB26155	Excalibur_c40618_182	26.1	A	A	B	A	A	B	A	A	A	A	A	B	A	B	A	B	B	A	A	B	B	A	B	A	A	A	B	B	B	A	A	B	B	A	A	B	B	A	B	A	B	A	B	A
804	4A	76067	IWA1137	wsnp_CAP8_c1013_646748	26.4	A	A	B	A	A	B	A	A	A	A	A	B	A	B	A	B	B	A	A	B	B	A	B	A	A	A	B	B	B	A	A	B	B	A	A	C	B	A	B	A	B	A	B	A
805	4A	6335	IWB6335	BS00011060_51	29.7	A	A	B	A	A	B	A	A	A	A	A	B	C	B	A	B	B	A	A	B	B	A	B	A	A	A	B	B	B	A	A	B	B	A	A	A	B	B	B	A	B	A	B	A
806	4A	47589	IWB47589	Kukri_c74409_199	30	A	A	B	A	A	B	A	A	A	A	A	B	C	B	A	B	B	A	A	B	B	A	B	A	A	A	B	B	B	A	A	B	B	A	A	C	B	B	B	A	B	A	B	A
807	4A	75759	IWA603	wsnp_BM138178A_Ta_2_1	31.4	A	A	B	A	A	B	A	A	A	A	A	B	C	B	A	B	A	A	A	B	B	A	B	A	A	A	B	B	B	A	A	B	B	A	A	C	B	B	B	A	B	A	B	A
808	4A	60371	IWB60371	RAC875_c754_120	32	A	A	B	A	A	B	A	A	A	A	A	B	C	B	A	B	A	A	A	B	B	A	B	A	A	A	B	B	B	A	A	B	B	A	A	C	B	B	B	A	B	A	B	A
809	4A	34759	IWB34759	IAAV3697	32.3	A	A	B	A	A	B	A	C	A	A	A	B	C	B	A	B	A	A	A	B	B	A	B	A	A	A	B	B	B	A	A	B	B	A	A	A	B	B	B	A	B	A	B	A
810	4A	78478	IWA4320	wsnp_Ex_c5690_9994305	33.1	A	A	B	A	A	B	A	A	A	A	A	B	B	B	A	B	A	B	A	B	B	A	B	A	A	B	B	B	B	A	A	B	B	A	A	A	B	B	B	A	B	A	B	A
811	4A	22239	IWB22239	Excalibur_c13276_1322	33.4	A	A	B	A	A	B	A	A	A	A	A	B	B	B	A	B	A	B	A	B	B	A	B	A	A	B	B	B	B	A	A	B	B	A	A	C	B	B	B	A	B	A	B	A
812	4A	4310	IWB4310	BobWhite_c7235_365	33.7	A	A	B	A	A	B	A	A	A	A	A	B	B	B	A	B	A	B	A	B	B	A	B	A	A	B	B	B	B	A	A	B	B	A	A	C	C	A	B	A	B	A	B	A
813	4A	76702	IWA1992	wsnp_Ex_c1520_2906995	33.9	A	A	B	A	A	B	A	A	A	A	A	B	B	B	A	B	A	B	A	B	B	A	B	A	A	B	B	B	B	A	A	B	B	A	A	A	C	A	B	A	B	B	B	A
814	4A	32882	IWB32882	GENE-2331_126	34.5	A	A	B	A	A	B	A	A	A	A	A	B	B	B	A	B	A	B	A	B	B	A	B	A	A	B	B	B	B	A	A	B	B	A	A	C	C	A	B	A	B	B	B	A
815	4A	77906	IWA3584	wsnp_Ex_c36701_44603531	35.1	A	A	B	A	A	B	A	A	A	A	A	B	B	B	A	B	A	B	A	B	B	A	B	A	A	B	B	B	B	A	A	B	B	A	A	C	C	A	B	A	B	B	B	A
816	4A	80749	IWA7382	wsnp_Ku_rep_c101597_88729428	37.1	A	A	B	A	A	B	A	A	A	B	A	B	B	B	A	C	A	B	A	B	B	A	B	A	B	B	B	B	B	C	A	B	B	A	A	C	C	A	B	A	B	B	B	C
817	4A	45656	IWB45656	Kukri_c46421_168	37.4	A	A	B	A	A	B	A	A	A	B	A	B	B	B	A	B	A	B	A	B	B	A	B	A	B	B	B	B	B	A	A	B	B	A	A	C	C	A	B	A	B	B	B	C
818	4A	65557	IWB65557	TA002470-0544	37.7	A	A	B	A	A	B	A	A	A	B	A	B	B	B	A	B	A	B	A	B	B	A	B	A	B	B	B	B	B	A	A	B	B	A	A	C	C	A	B	A	B	B	B	C
819	4A	52375	IWB52375	Ra_c64313_1337	38	A	A	B	A	A	B	A	A	A	B	A	B	B	B	A	B	A	B	A	B	B	A	B	A	B	B	B	B	B	A	A	B	B	A	A	A	C	A	B	A	B	B	B	C
820	4A	81378	IWA8265	wsnp_RFL_Contig1883_1034534	38.3	A	A	B	A	A	B	A	A	A	B	A	B	B	B	A	A	A	B	A	B	B	A	B	A	B	B	B	B	B	A	A	B	B	A	A	A	C	A	B	A	B	B	B	C
821	4A	79114	IWA5127	wsnp_Ex_rep_c105114_89631277	38.5	A	A	B	A	A	B	A	A	A	B	A	B	B	B	A	A	A	B	A	B	B	A	B	A	B	B	B	B	B	A	A	A	B	A	A	A	C	A	B	A	B	B	B	C
822	4A	80391	IWA6911	wsnp_Ku_c32619_42216179	38.8	A	A	B	A	A	B	A	A	A	B	A	B	B	B	A	A	A	B	A	B	B	A	B	A	B	B	B	B	B	A	A	A	B	A	A	C	C	A	B	A	B	B	B	C
823	4A	33395	IWB33395	GENE-3446_736	39.1	A	A	B	A	A	B	A	A	A	B	A	B	B	B	A	A	A	B	A	B	B	A	B	A	B	B	B	B	B	C	A	A	B	A	A	C	B	A	C	A	B	B	B	C
824	4A	30780	IWB30780	Excalibur_rep_c66815_273	39.7	A	A	B	A	A	B	A	A	A	B	A	B	B	B	A	A	A	B	A	B	B	A	B	A	B	B	B	B	B	A	A	A	A	A	A	C	C	A	B	A	B	B	B	C
825	4A	78108	IWA3845	wsnp_Ex_c4286_7734046	40	A	A	B	A	A	B	A	A	A	B	A	B	B	B	A	A	A	B	A	B	B	A	B	A	B	B	B	B	A	A	A	A	A	A	A	C	C	A	B	A	B	B	B	C
826	4A	77691	IWA3311	wsnp_Ex_c31006_39850673	40.2	A	A	B	A	A	B	A	A	A	B	A	B	B	B	A	C	A	B	A	B	B	A	B	A	B	B	B	B	A	A	A	A	A	A	A	C	C	A	B	A	B	B	B	C
827	4A	32815	IWB32815	GENE-2127_235	40.5	A	A	B	A	A	B	A	A	A	B	A	B	B	B	A	A	A	B	A	B	B	A	B	A	B	B	B	C	A	A	A	A	A	A	A	A	C	A	B	A	B	B	B	C
828	4A	78703	IWA4608	wsnp_Ex_c7011_12080274	41.4	A	A	B	A	A	B	A	A	A	B	A	B	B	B	A	A	A	B	A	B	B	A	B	A	B	B	B	B	A	A	A	A	A	A	A	C	C	A	B	A	B	B	B	C
829	4A	27970	IWB27970	Excalibur_c60487_908	42	A	A	B	A	A	B	A	A	A	B	A	B	B	B	A	A	A	A	A	B	B	A	B	A	B	B	B	B	A	A	A	A	A	A	A	B	A	A	B	A	B	B	B	C
830	4A	45853	IWB45853	Kukri_c48199_102	42.5	A	A	B	A	A	B	A	A	A	B	A	B	B	B	A	A	A	A	A	B	B	A	B	A	B	B	B	B	A	A	A	A	A	A	A	A	C	A	B	A	B	B	B	C
831	4A	58231	IWB58231	RAC875_c4629_1344	43.1	A	A	B	A	A	B	A	A	A	B	A	B	B	B	A	A	A	A	A	B	B	A	B	A	B	B	B	B	A	A	A	A	A	A	A	C	C	A	B	A	B	B	B	C
832	4A	79110	IWA5123	wsnp_Ex_rep_c104859_89444355	43.6	A	A	B	A	A	B	A	A	A	B	A	B	B	B	A	A	A	A	A	B	B	A	B	A	B	B	A	B	A	A	A	A	A	A	A	A	C	A	B	A	B	B	B	C
833	4A	73430	IWB73430	Tdurum_contig77704_144	43.9	A	A	B	A	A	B	A	A	A	B	A	B	B	B	A	A	A	A	A	B	B	A	B	A	B	B	A	B	A	A	A	A	A	A	A	A	C	A	B	A	B	B	B	C
834	4A	25253	IWB25253	Excalibur_c32735_603	44.2	A	A	B	A	A	B	A	A	A	B	A	B	B	B	A	A	A	A	A	B	B	A	B	A	B	B	A	B	A	A	A	A	A	A	A	A	C	A	B	A	B	B	B	C
835	4A	34865	IWB34865	IAAV4351	45.6	A	A	B	A	A	B	A	A	A	B	A	B	B	B	A	A	A	A	A	B	B	A	B	A	B	B	A	B	A	A	A	A	A	A	A	A	C	A	B	C	B	B	B	C
836	4A	43375	IWB43375	Kukri_c2706_1424	48.3	A	A	B	A	A	B	A	A	A	B	A	B	B	B	A	A	A	A	A	B	A	A	B	A	B	B	A	B	A	A	A	B	A	A	A	C	A	A	B	B	A	B	B	C
837	4A	20842	IWB20842	Ex_c50812_358	48.5	A	A	B	A	A	B	A	A	A	B	A	B	B	B	A	A	A	A	A	B	A	A	B	A	B	B	A	B	A	A	A	B	A	A	A	A	A	A	B	B	A	B	B	C
838	4A	4642	IWB4642	BobWhite_c9660_938	48.8	A	A	B	A	A	B	A	A	A	B	A	B	B	B	A	A	A	A	A	B	A	A	B	A	B	B	A	B	A	A	A	B	A	A	A	C	A	A	B	B	A	B	B	C
839	4A	11778	IWB11778	BS00092859_51	49.1	A	A	B	A	A	B	A	A	A	B	A	B	B	B	A	A	A	A	A	B	A	A	B	A	B	B	A	B	A	A	A	B	A	A	A	C	A	A	B	B	A	B	B	C
840	4A	43499	IWB43499	Kukri_c27874_515	51.1	A	A	B	A	A	B	A	A	A	B	A	B	B	B	A	A	A	A	A	B	A	A	B	A	B	B	A	B	A	A	A	B	A	A	A	B	B	A	B	B	A	B	B	A
841	4A	40846	IWB40846	Kukri_c12563_52	51.9	A	A	B	A	A	B	A	A	A	B	A	B	B	B	A	A	A	A	A	B	A	A	B	A	B	B	A	B	A	A	A	B	C	A	A	C	B	A	B	B	A	B	B	A
842	4A	80506	IWA7058	wsnp_Ku_c4342_7887834	52.8	A	A	B	A	A	B	A	A	A	B	A	B	B	B	A	A	A	A	A	B	A	A	B	A	B	B	A	A	A	A	A	B	A	A	A	C	B	A	B	B	A	B	B	B
843	4A	80257	IWA6733	wsnp_Ku_c2317_4448102	55.1	A	B	B	A	A	B	A	A	A	B	A	B	B	B	A	A	A	A	A	B	A	A	B	A	B	B	B	B	A	A	A	B	C	A	A	B	B	A	B	B	A	B	B	B
844	4A	80386	IWA6906	wsnp_Ku_c3237_6024936	57.4	A	B	B	B	A	B	A	A	A	B	A	B	B	B	A	A	A	A	A	B	A	A	B	A	B	B	B	B	A	A	A	B	A	A	A	C	B	A	B	B	A	B	B	B
845	4A	71273	IWB71273	Tdurum_contig42526_994	57.7	A	B	B	B	A	B	A	A	A	B	A	B	B	B	A	A	A	A	A	C	A	A	B	A	B	B	B	B	A	A	A	B	A	A	A	C	B	A	B	B	A	B	B	B
846	4A	26773	IWB26773	Excalibur_c46394_762	58	A	B	B	B	A	B	A	A	A	B	A	B	B	B	A	A	A	A	A	B	A	A	B	A	B	B	B	B	A	A	A	B	A	A	A	B	B	A	B	B	A	B	B	B
847	4A	74052	IWB74052	Tdurum_contig98808_554	58.3	A	B	B	B	A	B	A	A	A	B	A	B	B	B	A	A	A	A	A	B	A	A	B	A	B	B	B	B	A	A	A	B	A	A	A	C	B	A	B	B	A	B	B	B
848	4A	73994	IWB73994	Tdurum_contig97425_92	58.8	A	B	B	B	A	B	A	A	A	B	A	B	B	B	A	A	A	A	A	B	A	A	B	A	B	B	B	B	A	A	A	B	C	A	A	B	B	A	A	B	A	B	B	B
849	4A	9237	IWB9237	BS00064269_51	59.7	A	B	B	B	A	B	A	A	A	B	A	B	B	B	A	A	A	A	A	B	A	A	B	A	B	B	B	A	A	A	A	B	A	A	A	C	B	A	A	B	A	B	B	B
850	4A	71854	IWB71854	Tdurum_contig47858_908	64.9	A	B	B	B	A	B	C	A	A	A	A	A	B	B	A	A	A	A	A	B	A	A	B	A	B	B	B	A	B	A	A	B	A	A	A	C	A	A	A	B	A	B	B	B
851	4A	77587	IWA3188	wsnp_Ex_c28728_37832012	71.5	A	B	B	B	A	A	C	A	A	B	A	A	B	B	A	A	A	B	B	B	A	A	A	A	A	B	B	A	A	A	A	B	A	A	B	C	A	A	A	B	A	B	A	B
852	4A	73262	IWB73262	Tdurum_contig75183_685	82.9	A	B	A	B	A	A	A	B	B	B	A	A	B	B	A	A	A	B	A	B	A	A	A	A	C	B	B	A	A	A	B	B	A	A	B	C	A	A	B	A	A	A	A	B
853	4A	77502	IWA3068	wsnp_Ex_c26776_36003586	87.5	A	B	A	A	A	A	A	B	B	B	A	A	B	B	B	A	A	B	A	B	A	A	A	B	C	B	B	B	B	A	B	B	A	A	B	B	A	A	B	A	A	A	A	B
854	4A	73881	IWB73881	Tdurum_contig93527_486	87.8	B	B	A	A	A	A	A	B	B	B	A	A	B	B	B	A	A	B	A	B	A	A	A	B	C	B	B	B	B	A	B	B	A	A	B	B	A	A	B	A	A	A	A	B
855	4A	22609	IWB22609	Excalibur_c1534_572	88.1	B	B	A	A	A	A	A	B	B	B	A	A	B	B	B	A	A	B	A	C	A	A	A	B	C	B	B	B	B	A	B	B	A	A	B	C	A	A	B	A	A	A	A	B
856	4A	60738	IWB60738	RAC875_c83401_115	88.9	B	B	A	A	A	A	A	A	B	B	B	A	B	B	B	A	C	B	A	B	A	A	A	B	C	B	B	B	B	A	B	B	A	A	B	B	A	C	B	A	A	A	A	B
857	4A	46085	IWB46085	Kukri_c50675_126	91	B	B	A	A	A	A	A	A	B	B	B	A	B	B	B	A	B	B	A	B	A	A	A	B	C	B	B	B	B	A	B	B	A	A	B	B	A	A	B	A	A	A	B	B
858	4A	51216	IWB51216	Ra_c16330_1189	91.8	B	B	A	A	A	A	A	A	B	B	B	A	B	B	B	A	B	B	A	B	A	A	A	A	C	B	B	B	B	A	B	B	A	A	B	B	A	A	B	A	A	A	B	B
859	4A	6821	IWB6821	BS00021957_51	92.1	B	B	A	A	A	A	A	A	B	B	B	A	B	B	B	A	B	B	A	B	A	A	A	A	C	B	B	B	B	A	B	B	A	A	B	B	A	A	B	A	A	A	B	B
860	4A	68606	IWB68606	Tdurum_contig17050_547	97.6	B	B	A	A	A	A	A	A	B	B	B	A	B	B	B	A	B	B	A	B	A	A	A	A	B	B	B	B	A	A	B	B	A	A	B	C	A	A	B	A	A	A	B	B
861	4A	34807	IWB34807	IAAV3960	98.1	B	B	A	A	A	A	A	A	B	B	B	A	B	B	B	A	B	B	A	B	A	A	A	A	B	B	B	B	A	A	B	B	A	B	B	A	A	A	B	A	A	A	B	B
862	4A	7898	IWB7898	BS00032622_51	100.1	B	B	A	B	A	A	A	A	B	B	B	A	B	B	B	A	B	B	A	B	A	A	A	A	B	B	B	B	A	A	B	B	A	B	B	C	A	A	B	A	B	A	B	B
863	4A	60429	IWB60429	RAC875_c7670_219	100.7	B	B	A	B	B	A	A	A	B	B	B	A	B	B	B	A	B	B	A	B	A	A	A	A	B	B	B	B	A	A	B	B	A	B	B	C	A	A	B	A	B	A	B	B
864	4A	28848	IWB28848	Excalibur_c7753_51	100.9	B	B	A	B	B	A	A	A	B	B	B	A	B	B	B	A	B	B	A	B	A	A	A	A	B	B	B	B	A	A	B	B	A	B	B	C	A	A	B	A	B	A	B	B
865	4A	9301	IWB9301	BS00064494_51	101.2	B	B	A	B	B	A	A	A	B	B	B	A	B	B	B	A	B	B	A	B	A	A	A	C	B	B	B	B	A	A	B	B	A	B	B	A	A	A	B	A	B	A	B	B
866	4A	11380	IWB11380	BS00084703_51	101.5	B	B	A	B	B	A	A	A	B	B	B	A	B	B	B	A	B	B	A	B	A	A	A	A	B	B	B	B	A	A	B	B	A	B	B	A	A	A	B	A	B	A	B	B
867	4A	61381	IWB61381	RAC875_rep_c104791_336	112.3	B	B	A	B	B	B	A	A	B	B	B	A	B	B	B	B	B	B	A	C	A	A	B	A	A	B	B	B	A	A	B	B	A	B	A	A	A	A	B	A	B	A	B	A
868	4A	6832	IWB6832	BS00021973_51	112.6	B	B	A	B	B	B	A	A	B	B	B	A	B	B	B	B	B	B	A	B	A	A	B	A	A	B	B	B	A	A	B	B	A	B	A	C	A	A	B	A	B	A	B	A
869	4A	9431	IWB9431	BS00065030_51	114.9	B	B	A	B	B	B	B	A	B	B	B	A	B	B	B	B	B	B	A	B	A	A	B	A	A	B	B	B	A	A	B	B	A	B	A	C	B	A	B	A	B	A	B	A
870	4A	70620	IWB70620	Tdurum_contig39549_245	115.1	B	B	A	B	B	B	B	A	B	B	B	A	B	B	B	B	B	B	A	B	A	A	B	A	A	B	B	B	A	A	B	B	A	B	A	A	B	A	B	A	B	A	B	A
871	4A	62397	IWB62397	RAC875_rep_c117027_577	116.3	B	B	A	B	B	B	B	A	B	B	B	A	B	B	B	B	B	B	A	B	A	A	B	A	A	B	B	B	A	A	B	B	A	B	A	A	B	A	B	A	B	A	C	A
872	4A	72220	IWB72220	Tdurum_contig51959_1408	116.5	B	B	A	B	B	B	B	A	B	B	B	A	B	B	B	B	B	B	A	B	A	A	B	A	A	B	B	B	A	A	B	B	A	B	A	C	B	A	B	A	B	A	B	A
873	4A	71539	IWB71539	Tdurum_contig44771_1001	117.6	B	B	A	B	B	B	B	A	B	B	B	A	B	B	B	B	B	B	A	B	A	A	B	A	A	B	B	B	A	A	B	B	A	B	A	A	B	A	B	A	B	A	B	A
874	4A	70736	IWB70736	Tdurum_contig42019_323	118.2	B	B	A	B	B	B	B	A	B	B	B	A	B	B	B	B	B	B	A	B	A	A	B	A	A	B	B	B	A	A	B	B	A	B	A	A	B	A	B	A	A	A	B	A
875	4A	34365	IWB34365	IAAV136	119.5	B	B	A	B	B	B	A	A	B	B	B	A	A	B	B	B	B	B	A	B	A	A	B	A	A	B	B	B	A	A	B	B	A	B	A	A	A	A	B	A	A	A	B	A
876	4A	2634	IWB2634	BobWhite_c3351_329	119.8	B	B	A	B	B	B	A	A	B	B	B	A	A	B	B	B	B	B	A	B	A	A	B	A	A	B	B	B	A	A	B	B	A	B	A	C	A	A	B	A	A	A	B	A
877	4A	59773	IWB59773	RAC875_c63420_397	122.5	B	B	A	B	B	B	A	A	B	B	B	A	A	B	B	B	B	B	A	B	A	A	B	A	B	B	C	B	A	A	B	B	A	B	A	A	A	A	B	A	B	A	B	A
878	4A	71768	IWB71768	Tdurum_contig47143_241	122.8	B	B	A	B	B	B	A	A	B	B	B	A	A	B	B	B	B	B	A	B	A	A	B	A	C	B	B	B	A	A	B	B	A	B	A	A	A	A	B	A	B	A	B	A
879	4A	41538	IWB41538	Kukri_c1620_779	123	B	B	A	B	B	B	A	A	B	B	B	A	A	B	B	B	B	B	A	B	A	A	B	C	C	A	B	B	A	A	B	B	A	B	A	A	A	A	B	A	B	A	B	A
880	4A	70194	IWB70194	Tdurum_contig31218_344	123.6	B	B	A	B	B	B	A	A	B	B	B	C	A	B	B	B	B	B	A	B	A	A	B	A	C	A	B	B	A	A	A	B	C	B	A	B	A	A	B	A	B	A	B	A
881	4B	80051	IWA6457	wsnp_Ku_c12399_20037334	0	A	B	A	B	A	A	A	A	B	A	B	A	A	A	B	A	B	B	A	B	A	B	A	B	A	B	B	B	B	B	B	B	A	B	A	B	A	B	B	B	B	A	B	A
882	4B	33242	IWB33242	GENE-3126_21	0.3	A	B	A	B	A	A	A	A	B	A	B	A	A	A	B	A	B	B	A	B	A	B	A	B	A	B	B	B	B	B	B	B	A	B	A	B	A	B	B	B	B	A	B	A
883	4B	71798	IWB71798	Tdurum_contig47429_501	0.6	A	B	A	B	A	A	A	A	B	A	B	A	A	A	B	A	B	B	A	B	A	B	A	B	A	B	B	B	B	B	B	B	A	B	A	B	A	B	B	B	B	A	B	A
884	4B	6329	IWB6329	BS00011038_51	0.8	A	B	A	B	A	A	A	A	B	A	B	A	A	A	B	A	B	B	A	B	A	B	A	B	A	B	B	B	B	B	B	B	A	B	A	B	A	B	B	B	B	A	B	A
885	4B	9271	IWB9271	BS00064403_51	2	A	B	A	B	A	A	B	A	B	A	B	A	A	A	B	A	B	B	A	B	A	B	A	B	A	B	B	B	B	B	B	B	A	B	A	B	A	B	B	B	B	A	B	A
886	4B	11911	IWB11911	BS00095028_51	2.3	A	B	A	B	A	A	B	A	B	A	B	B	A	A	B	A	B	B	A	B	A	B	A	B	A	B	B	B	B	B	B	B	A	B	A	B	A	B	B	B	B	A	B	A
887	4B	55304	IWB55304	RAC875_c22142_333	10.6	A	B	A	B	A	A	A	A	B	A	B	B	A	A	B	A	A	B	A	B	A	B	A	B	A	B	B	B	B	B	B	B	C	B	A	C	A	B	B	B	A	A	B	A
888	4B	73905	IWB73905	Tdurum_contig94184_313	14.3	A	B	A	B	A	A	A	A	B	A	B	B	A	A	B	A	A	B	A	B	A	B	A	B	A	B	B	B	B	B	B	B	C	B	A	B	A	B	B	B	A	A	B	A
889	4B	63894	IWB63894	RFL_Contig2277_1527	18.7	A	B	A	B	A	A	A	A	B	A	B	B	A	B	B	A	A	B	A	B	B	B	A	B	A	B	B	B	B	B	B	B	C	B	A	B	A	B	B	B	A	A	B	A
890	4B	34257	IWB34257	GENE-4933_1085	22.9	A	B	A	B	A	A	A	A	B	A	B	B	A	B	B	A	A	A	A	B	B	B	A	B	A	B	B	B	A	B	B	B	C	A	A	B	A	B	B	B	A	A	B	A
891	4B	73354	IWB73354	Tdurum_contig76213_958	23.2	A	B	A	B	A	A	A	A	B	A	B	B	A	B	B	A	A	A	A	B	B	B	A	B	A	B	B	B	A	B	B	B	C	A	A	B	A	B	B	B	A	A	B	A
892	4B	2333	IWB2333	BobWhite_c30050_125	24.9	A	B	A	B	A	A	A	A	B	A	B	B	A	B	B	A	A	A	A	B	B	B	A	B	A	B	B	B	A	B	B	B	C	A	A	B	A	B	B	B	A	A	B	A
893	4B	47849	IWB47849	Kukri_c80544_61	25.2	A	B	A	B	A	A	A	A	B	A	B	B	A	B	B	A	A	A	A	B	B	B	A	B	A	B	B	B	A	B	B	B	C	A	A	B	A	B	B	B	A	A	B	A
894	4B	80693	IWA7311	wsnp_Ku_c8075_13785546	27.2	A	B	A	B	A	A	A	A	B	A	B	B	A	B	B	A	A	A	B	B	A	B	A	B	A	B	B	B	A	B	B	B	C	A	A	B	A	B	B	B	A	A	B	C
895	4B	17908	IWB17908	D_GA8KES402IFV6C_200	33	A	B	A	B	B	B	A	B	B	A	B	B	B	B	B	A	A	A	B	C	A	A	A	A	A	B	A	B	A	B	B	B	C	A	A	B	A	B	A	B	A	A	B	A
896	4B	72203	IWB72203	Tdurum_contig51688_681	35.7	B	B	A	B	B	B	A	B	B	A	A	A	B	B	B	A	A	A	B	C	A	A	A	A	A	B	A	B	A	C	B	B	C	A	A	C	A	B	A	A	A	A	B	A
897	4B	44602	IWB44602	Kukri_c36744_353	38	B	B	A	B	B	B	A	B	B	A	A	A	B	A	B	A	A	A	B	A	A	A	A	A	A	B	A	B	A	B	B	B	B	A	A	B	B	A	A	A	A	A	B	A
898	4B	73563	IWB73563	Tdurum_contig82378_264	38.3	B	B	A	B	B	B	A	B	B	A	A	A	B	A	B	A	A	A	B	A	A	A	A	A	A	B	A	B	A	B	B	B	C	A	A	B	B	A	A	A	A	A	B	A
899	4B	71024	IWB71024	Tdurum_contig42229_371	38.9	B	B	A	B	B	B	A	B	B	A	A	A	B	A	B	A	A	A	B	A	A	A	A	A	A	B	A	B	A	B	B	B	C	A	A	C	B	A	A	A	A	A	B	A
900	4B	7934	IWB7934	BS00033614_51	39.1	B	B	A	B	B	B	A	B	B	A	A	A	B	A	B	A	A	A	B	A	A	A	A	A	A	B	A	B	A	B	B	B	C	A	A	B	B	A	A	A	A	A	B	A
901	4B	8985	IWB8985	BS00063035_51	40.9	B	B	A	B	B	B	A	B	B	A	A	A	B	A	B	A	A	A	B	A	A	A	A	A	A	B	A	A	A	B	B	B	C	A	A	B	B	A	A	A	A	A	B	A
902	4B	71634	IWB71634	Tdurum_contig45706_1182	41.7	B	B	A	B	B	B	A	B	B	A	A	A	B	A	B	A	A	A	B	A	A	A	A	A	A	B	A	A	A	B	B	B	C	A	A	B	B	A	A	A	A	A	B	A
903	4B	73589	IWB73589	Tdurum_contig82633_417	42	B	B	A	B	B	B	A	B	B	A	A	A	B	A	B	A	A	A	B	A	A	A	A	A	A	B	A	A	A	B	B	B	C	A	A	B	B	A	A	A	A	A	B	A
904	4B	7822	IWB7822	BS00031139_51	42.3	B	B	A	B	B	B	A	B	B	A	A	A	B	A	B	A	A	A	C	A	A	A	A	A	A	B	A	C	A	B	B	B	A	A	A	C	B	A	A	A	A	A	B	C
905	4B	72792	IWB72792	Tdurum_contig61465_781	42.6	B	B	A	B	B	B	A	B	B	A	A	A	B	A	B	A	A	A	B	A	A	A	A	A	A	B	A	A	A	B	B	B	C	A	A	B	B	A	A	A	A	A	B	A
906	4B	67171	IWB67171	Tdurum_contig11603_149	42.8	B	B	A	B	B	B	A	B	B	A	A	A	B	A	B	A	A	A	B	A	A	A	A	A	A	B	A	A	A	B	B	B	C	A	A	B	B	A	A	A	A	A	B	A
907	4B	72005	IWB72005	Tdurum_contig4974_2190	43.1	B	B	A	B	B	B	A	B	B	A	A	A	B	A	B	A	A	A	B	A	A	A	A	A	A	B	A	A	A	B	B	B	C	A	A	B	B	A	A	A	A	A	B	A
908	4B	67738	IWB67738	Tdurum_contig12801_136	43.4	B	B	A	B	B	B	A	B	B	A	A	A	B	A	B	A	A	A	B	A	A	A	A	A	A	B	A	A	A	B	B	B	C	A	A	B	B	A	A	A	A	A	B	A
909	4B	72225	IWB72225	Tdurum_contig51996_894	44.2	B	B	A	B	B	B	A	B	B	A	A	A	B	A	A	A	A	A	B	A	A	A	A	A	A	B	A	A	A	B	B	B	C	A	A	B	B	A	A	A	B	A	B	A
910	4B	28667	IWB28667	Excalibur_c7343_57	44.7	B	B	A	B	B	B	A	B	B	A	A	A	B	A	A	A	A	A	B	A	A	A	A	A	A	B	A	A	A	B	B	B	A	A	A	B	B	A	A	A	B	A	B	A
911	4B	27487	IWB27487	Excalibur_c54493_105	45	B	B	A	B	B	B	A	B	B	A	A	A	B	A	A	A	A	A	B	A	A	A	A	C	A	B	A	A	A	B	B	B	A	A	A	B	B	A	A	A	B	A	C	A
912	4B	32941	IWB32941	GENE-2463_273	45.3	B	B	A	B	B	B	A	B	B	A	A	A	B	A	A	A	A	A	B	A	A	A	A	A	A	B	A	A	A	B	B	B	A	A	A	C	B	A	A	A	B	A	B	A
913	4B	36179	IWB36179	IACX69	45.6	B	B	A	B	B	B	A	B	B	A	A	A	B	A	A	A	A	A	B	A	A	A	A	A	A	B	A	A	A	B	B	B	C	A	A	B	B	A	A	A	B	A	B	A
914	4B	72265	IWB72265	Tdurum_contig52356_517	45.9	B	B	A	B	B	B	A	B	B	A	A	A	B	A	A	A	A	A	B	A	A	A	A	B	A	B	A	A	A	B	B	B	C	A	A	B	B	A	A	A	B	A	B	A
915	4B	72399	IWB72399	Tdurum_contig54854_547	48.8	B	B	A	B	B	B	B	B	B	A	A	A	B	A	A	A	A	A	B	A	A	A	A	B	A	B	A	A	A	B	B	B	C	A	A	C	B	C	A	A	B	A	B	A
916	4B	44068	IWB44068	Kukri_c322_1394	52	B	B	A	B	B	B	B	B	B	A	A	A	B	A	A	A	A	A	B	A	A	A	A	B	A	B	A	A	A	B	B	B	C	A	A	C	B	A	A	B	B	A	B	A
917	4B	40589	IWB40589	Kukri_c11415_1074	52.3	B	B	A	B	B	B	B	B	B	A	A	A	B	A	A	A	A	A	B	A	A	A	A	B	A	B	A	A	A	B	B	B	C	A	A	B	B	A	A	B	B	A	B	A
918	4B	7195	IWB7195	BS00022653_51	52.9	B	B	A	B	B	B	B	B	B	A	A	A	B	C	A	A	A	A	B	A	A	A	A	B	A	B	A	A	A	B	B	B	C	A	A	B	B	A	A	B	B	A	B	A
919	4B	39484	IWB39484	Ku_c462_1417	53.7	B	B	A	B	B	B	B	B	B	A	A	A	B	A	A	A	A	A	B	A	A	A	A	B	A	B	A	A	A	B	B	B	C	A	A	B	B	A	A	B	B	A	B	A
920	4B	76849	IWA2171	wsnp_Ex_c16825_25387841	54.2	B	B	A	B	B	B	B	B	B	A	A	A	B	A	A	A	A	A	B	A	A	A	A	B	A	B	A	A	A	B	B	B	C	A	A	B	B	A	A	B	B	A	B	A
921	4B	36379	IWB36379	IACX938	55.1	B	B	A	B	B	B	B	B	B	A	A	A	B	A	A	A	A	A	B	A	A	A	A	B	A	B	A	A	A	B	B	B	C	A	A	B	B	A	A	B	B	A	B	A
922	4B	71580	IWB71580	Tdurum_contig45125_230	55.3	B	B	A	B	B	B	B	B	B	A	A	A	B	A	A	A	A	A	B	A	A	A	A	B	A	B	A	A	A	B	B	B	C	A	A	B	B	A	A	B	B	A	B	A
923	4B	13200	IWB13200	CAP12_c1416_177	55.6	B	B	A	B	B	B	B	B	B	A	A	A	B	A	A	A	A	A	B	A	A	A	A	B	A	B	A	A	A	B	B	B	C	A	A	B	B	A	A	B	B	A	B	A
924	4B	44944	IWB44944	Kukri_c39699_271	55.9	B	B	A	B	B	B	B	B	B	A	A	A	B	A	A	A	A	A	B	A	A	A	A	B	A	B	A	A	A	B	B	B	C	A	A	B	B	A	A	B	B	A	B	A
925	4B	60004	IWB60004	RAC875_c66141_332	56.2	B	B	A	B	B	B	B	B	B	A	A	A	B	A	A	A	A	A	B	A	A	A	A	B	A	B	A	A	A	B	B	B	C	A	A	B	B	A	A	B	B	A	B	A
926	4B	71666	IWB71666	Tdurum_contig46247_106	56.4	B	B	A	B	B	B	B	B	B	A	A	A	B	A	A	A	A	A	B	A	A	A	A	B	A	B	A	A	A	B	B	B	C	A	A	B	B	A	A	B	B	A	B	A
927	4B	73383	IWB73383	Tdurum_contig76556_139	57.5	B	B	A	B	B	B	B	B	B	A	A	A	B	A	B	A	A	A	B	A	A	A	A	B	A	B	A	A	A	B	B	B	C	A	A	B	B	A	A	B	B	A	B	A
928	4B	72121	IWB72121	Tdurum_contig50783_67	57.8	B	B	A	B	B	B	B	B	B	A	A	A	B	A	B	A	A	A	B	A	A	A	A	B	A	B	A	A	A	B	B	B	C	A	A	B	B	A	A	B	B	A	B	A
929	4B	69929	IWB69929	Tdurum_contig29960_91	58.1	B	B	A	B	B	B	B	B	B	A	A	A	B	A	B	A	A	A	B	A	A	A	A	B	A	B	A	A	A	B	B	B	C	A	A	B	B	A	A	B	B	A	B	A
930	4B	20754	IWB20754	Ex_c45493_761	63.2	B	B	A	B	B	B	B	B	A	A	A	B	B	A	B	A	A	A	B	B	A	A	A	B	A	B	A	A	A	B	B	B	B	A	A	A	B	A	A	B	B	A	B	A
931	4B	77665	IWA3279	wsnp_Ex_c30473_39386277	63.7	B	B	B	B	B	B	B	B	A	A	A	B	B	A	C	A	A	A	B	B	B	A	A	B	A	B	A	A	A	B	B	B	C	A	A	A	B	A	A	B	B	A	B	A
932	4B	6828	IWB6828	BS00021969_51	64	B	B	B	B	B	B	B	B	A	A	A	B	B	A	A	A	A	A	B	B	B	A	A	B	A	B	A	A	A	B	B	B	A	C	A	A	B	A	A	B	B	A	B	A
933	4B	73977	IWB73977	Tdurum_contig97207_435	66.7	B	B	A	B	B	B	B	B	A	A	A	B	B	B	C	A	A	A	B	B	B	A	A	B	A	B	A	A	A	B	B	B	C	C	A	A	B	A	A	B	B	A	B	A
934	4B	32544	IWB32544	GENE-1584_692	67.5	B	B	A	B	B	B	B	B	A	A	A	B	B	B	C	A	A	A	B	B	B	A	A	B	A	B	A	A	A	B	B	B	C	B	A	A	B	A	A	B	B	A	B	A
935	4B	45457	IWB45457	Kukri_c44559_429	68.7	B	B	A	B	B	A	B	B	A	A	A	B	B	B	C	A	A	A	B	B	B	A	A	B	A	B	A	A	A	B	B	B	C	C	A	A	B	A	A	B	B	A	B	C
936	4B	33076	IWB33076	GENE-2826_154	69.2	B	B	A	B	B	A	B	B	A	A	A	B	B	B	C	A	A	A	B	B	B	A	A	B	A	B	A	A	A	B	B	B	C	B	A	A	B	A	A	B	B	A	B	A
937	4B	26089	IWB26089	Excalibur_c39876_403	69.8	B	B	A	B	B	A	B	B	A	A	A	B	B	B	A	A	A	A	A	B	B	A	A	B	A	B	A	A	A	B	B	B	A	B	A	A	B	B	A	B	B	A	B	A
938	4B	72184	IWB72184	Tdurum_contig51521_90	70	B	B	A	B	B	A	B	B	A	A	A	B	B	B	A	A	A	A	A	B	B	A	A	B	A	B	A	A	A	B	B	B	C	C	A	A	B	B	A	B	B	A	B	A
939	4B	74188	IWB74188	tplb0024i19_322	70.3	B	B	A	B	B	A	B	B	A	A	A	B	B	B	A	A	A	A	A	B	B	A	A	B	A	B	A	A	A	B	B	B	C	B	A	A	B	B	A	B	B	A	B	A
940	4B	77162	IWA2595	wsnp_Ex_c21293_30421496	70.9	B	B	B	B	B	A	B	B	A	A	A	B	B	B	A	A	A	A	A	B	B	A	A	B	A	B	A	A	A	B	B	B	C	B	A	A	B	B	A	B	B	A	B	A
941	4B	48353	IWB48353	Kukri_c93922_206	71.1	B	B	B	B	B	A	B	B	A	A	A	B	B	B	A	A	A	A	A	B	B	A	A	B	A	B	A	A	A	B	B	B	A	B	A	A	B	B	A	B	B	A	B	A
942	4B	3246	IWB3246	BobWhite_c4256_213	73.7	B	B	B	B	B	A	B	B	A	A	A	A	B	B	A	A	A	A	A	B	B	A	A	B	B	B	A	A	A	B	B	B	C	B	A	A	B	B	A	B	B	A	B	A
943	4B	48622	IWB48622	Kukri_rep_c101259_81	74	B	B	B	B	B	A	B	B	A	A	A	A	B	B	A	A	A	A	A	B	B	A	A	B	B	B	A	A	A	B	B	B	C	B	A	A	B	B	A	B	B	A	B	A
944	4B	35335	IWB35335	IAAV7394	76.6	B	B	B	B	B	A	B	C	A	A	A	A	B	B	A	A	A	A	A	B	B	A	A	B	B	B	B	A	A	B	A	B	C	B	A	A	B	B	A	B	B	A	B	A
945	4B	6021	IWB6021	BS00008627_51	78.6	A	B	B	B	B	A	B	A	A	A	A	A	B	B	B	A	A	A	A	B	B	A	A	B	B	B	B	A	A	B	A	B	A	B	A	A	B	B	A	B	B	A	B	A
946	4B	8859	IWB8859	BS00062304_51	79.1	A	B	B	B	B	A	B	A	A	A	A	A	B	B	B	A	A	A	A	B	B	A	A	B	B	B	B	A	A	B	A	B	A	B	A	A	B	B	A	B	B	A	B	A
947	4B	57507	IWB57507	RAC875_c39339_400	83	A	B	B	B	B	C	B	A	A	A	A	A	B	B	B	A	A	A	A	B	B	A	A	B	B	A	B	C	A	B	A	B	B	B	A	A	B	B	A	B	A	A	B	A
948	4B	7958	IWB7958	BS00034148_51	83.3	A	B	B	B	B	C	B	A	A	C	A	A	B	B	B	A	A	A	A	B	B	A	A	B	B	A	B	A	A	B	A	B	B	B	A	A	B	B	A	B	A	A	B	A
949	4D	15465	IWB15465	D_contig08192_385	0	B	A	B	A	A	B	B	A	B	B	A	B	A	A	B	A	B	A	A	A	B	A	B	B	A	B	B	A	A	B	B	B	B	A	B	C	A	B	B	B	B	A	A	B
950	4D	6670	IWB6670	BS00019676_51	0.6	B	B	B	A	A	B	B	A	B	B	A	A	A	A	B	A	B	A	A	A	B	A	B	B	A	B	B	A	A	B	B	B	B	A	B	C	A	B	B	B	B	A	A	B
951	4D	53820	IWB53820	RAC875_c13945_597	20.7	B	B	B	A	B	B	A	A	B	A	A	A	A	A	B	A	A	B	A	B	B	A	B	B	A	B	A	B	A	B	B	B	A	A	C	A	B	B	A	B	B	A	A	B
952	4D	41974	IWB41974	Kukri_c18444_266	30.8	B	B	B	A	B	B	A	B	B	B	A	A	A	A	A	A	A	B	A	B	B	B	B	B	A	A	A	B	A	B	B	B	A	A	B	A	B	B	A	C	B	A	A	A
953	4D	15038	IWB15038	CAP8_rep_c5023_658	34	B	B	B	A	B	B	A	B	B	B	A	B	A	A	A	A	A	B	A	B	B	B	B	B	A	A	C	B	A	B	B	B	A	A	B	A	B	B	A	C	B	A	A	A
954	4D	60685	IWB60685	RAC875_c8234_293	34.5	B	B	B	A	B	B	A	B	B	B	A	B	A	A	A	A	A	B	A	B	B	B	B	B	A	A	C	B	A	B	B	B	A	A	B	A	B	B	A	C	B	A	A	A
955	4D	30733	IWB30733	Excalibur_rep_c66353_598	38.3	B	B	B	B	B	B	A	B	B	B	A	B	A	A	A	A	A	B	A	B	B	B	C	B	A	A	B	B	A	A	B	B	A	A	B	C	B	B	A	C	B	A	A	A
956	4D	20608	IWB20608	Ex_c3802_71	39.4	B	B	B	B	B	B	A	B	B	B	A	B	A	A	A	A	A	B	A	B	A	B	B	A	A	A	B	B	A	A	B	B	A	A	B	A	B	B	A	C	B	A	A	A
957	4D	25533	IWB25533	Excalibur_c34923_401	39.7	B	B	B	B	B	B	A	B	B	B	A	B	A	A	A	A	A	B	A	B	A	B	B	A	A	A	B	B	A	A	B	B	A	A	B	C	B	B	A	C	B	A	A	A
958	4D	15933	IWB15933	D_contig18653_123	44	B	B	B	B	B	B	A	B	B	B	A	B	A	A	A	A	A	C	A	B	A	B	B	A	A	A	C	B	A	A	B	B	A	A	B	C	B	B	A	C	A	A	A	A
959	4D	65603	IWB65603	TA002774-0685	46.9	B	B	B	B	B	B	A	B	B	B	A	B	A	A	A	A	A	B	A	B	A	B	B	A	A	A	C	B	A	A	B	B	A	A	B	B	B	B	A	C	A	A	B	A
960	4D	65609	IWB65609	TA002864-0595	48	A	B	B	B	B	B	A	B	B	B	A	B	A	A	A	A	A	A	A	B	A	B	B	A	A	A	C	B	A	A	B	B	A	B	B	B	B	B	A	C	A	A	B	A
961	4D	75631	IWA430	wsnp_BF202706D_Ta_1_1	49.7	A	B	A	B	B	B	A	B	B	B	A	B	A	A	A	A	A	A	A	B	A	B	B	A	A	A	C	B	B	A	B	B	A	B	B	B	B	B	A	C	A	B	B	A
962	4D	27974	IWB27974	Excalibur_c6055_1930	50.5	A	B	A	B	B	B	A	B	B	B	A	B	A	A	A	A	A	A	A	B	A	B	B	A	A	A	C	B	B	A	B	B	A	B	B	C	B	B	A	C	A	B	B	A
963	4D	40326	IWB40326	Kukri_c10365_1062	51.7	A	B	A	B	B	B	A	B	B	B	A	B	A	A	A	A	A	A	A	B	A	B	B	A	A	A	C	B	B	A	B	B	A	B	B	B	B	A	A	B	A	B	B	A
964	4D	28812	IWB28812	Excalibur_c7672_364	52.5	A	B	A	B	B	B	A	B	B	B	A	B	A	A	A	A	A	A	A	B	A	B	B	A	A	A	C	B	B	A	B	B	A	B	B	B	B	A	A	B	A	A	B	A
965	4D	17561	IWB17561	D_F5XZDLF01DLRB6_99	54.2	A	B	A	B	B	B	A	B	B	B	A	B	A	A	A	A	A	A	A	B	A	B	B	A	A	A	C	B	B	A	B	B	A	B	B	B	B	A	A	B	A	A	B	B
966	4D	81519	IWA8514	wsnp_RFL_Contig3792_4086706	54.8	A	B	A	B	B	B	A	B	B	B	A	B	A	A	A	A	A	A	A	B	A	B	B	A	A	A	B	B	B	A	B	B	A	B	B	B	B	A	A	B	A	A	B	B
967	4D	75531	IWA286	wsnp_BE497160D_Ta_2_1	61.8	A	B	A	B	B	B	A	B	B	B	A	B	A	A	A	A	A	B	A	B	A	B	B	A	B	A	B	B	B	A	B	B	A	B	A	B	B	A	A	B	A	A	B	B
968	4D	29166	IWB29166	Excalibur_c864_502	63.7	A	B	A	B	B	B	A	B	B	B	A	B	A	A	A	A	A	B	A	B	A	B	B	A	B	A	B	B	B	A	B	B	A	B	A	A	A	A	A	B	A	A	B	B
969	4D	75594	IWA382	wsnp_BE591739D_Ta_2_3	67.3	A	B	A	B	B	B	A	B	B	B	A	B	A	A	B	A	A	B	A	B	A	B	B	A	B	A	B	B	B	A	B	B	A	B	A	B	A	A	A	B	A	A	B	B
970	4D	28897	IWB28897	Excalibur_c79009_131	82.8	A	B	B	B	B	B	A	B	B	B	A	B	A	B	B	B	A	B	A	B	A	B	B	A	A	B	B	B	B	A	B	A	B	B	A	B	A	A	A	B	A	B	B	B
971	4D	43325	IWB43325	Kukri_c26670_493	88.2	A	B	B	A	B	A	A	B	B	B	A	B	A	B	B	B	A	B	A	B	A	B	B	A	A	B	B	B	B	A	B	A	B	B	A	B	A	A	B	B	A	B	B	A
972	4D	49126	IWB49126	Kukri_rep_c105952_87	97	B	B	B	A	B	A	A	B	B	B	A	B	A	B	B	B	A	B	A	B	A	B	B	A	A	A	B	A	B	B	B	A	B	C	A	B	A	A	A	B	B	B	B	A
973	4D	39068	IWB39068	Ku_c2885_1277	114.1	B	B	A	A	A	A	A	A	B	A	B	C	B	A	B	B	A	B	B	B	B	B	A	A	A	B	B	B	B	B	C	A	B	C	B	B	A	A	A	A	A	B	B	B
974	4D	2170	IWB2170	BobWhite_c28101_376	114.9	B	B	A	A	A	A	A	A	B	A	B	C	B	A	B	B	A	B	B	B	B	B	A	A	A	B	B	B	B	B	B	A	B	A	B	B	A	A	A	A	A	B	B	A
975	5A	4290	IWB4290	BobWhite_c7114_237	0	B	A	B	A	B	A	A	B	B	B	B	A	B	A	A	C	B	B	A	B	B	A	B	A	C	A	A	A	A	B	A	A	A	C	A	A	B	B	B	A	B	A	B	B
976	5A	78576	IWA4445	wsnp_Ex_c6209_10838456	1.1	B	A	B	A	B	A	A	B	B	B	B	A	B	A	A	A	B	B	A	B	B	A	B	A	C	A	A	A	A	B	A	A	A	A	A	A	B	B	B	A	B	B	B	B
977	5A	65889	IWB65889	TA004832-0873	1.7	B	A	B	A	B	A	A	B	B	B	B	A	B	A	A	B	B	B	A	B	B	A	B	A	C	A	A	A	A	B	A	A	C	B	A	A	B	B	B	A	B	B	B	B
978	5A	77894	IWA3566	wsnp_Ex_c3620_6612231	2.5	A	A	B	A	B	A	A	B	B	B	B	A	B	A	A	B	B	B	A	B	B	A	B	B	C	A	A	A	A	B	A	A	C	B	A	A	B	B	B	A	B	B	B	B
979	5A	79712	IWA5923	wsnp_JD_c2128_2930150	3.1	A	A	B	A	B	A	A	B	B	B	B	A	B	A	A	A	B	B	A	C	B	A	B	B	C	A	A	A	A	B	A	A	A	A	A	A	B	B	B	A	B	B	B	B
980	5A	55024	IWB55024	RAC875_c2061_55	6.7	A	A	B	B	B	A	A	B	B	B	B	A	B	A	A	C	B	B	B	B	B	A	B	B	C	A	A	A	A	B	A	A	A	C	A	A	B	B	B	A	B	B	B	B
981	5A	76829	IWA2145	wsnp_Ex_c16551_25061517	11.8	A	A	B	A	B	A	A	B	A	B	B	A	B	B	A	B	B	B	B	B	B	A	B	A	C	A	A	A	A	B	A	A	A	B	A	A	A	A	B	A	B	B	B	B
982	5A	9216	IWB9216	BS00064188_51	12.1	A	A	B	A	B	A	A	B	A	B	B	A	B	B	A	C	B	B	B	B	B	A	B	A	C	A	A	A	A	B	A	A	A	C	A	A	A	A	B	A	B	B	B	B
983	5A	28466	IWB28466	Excalibur_c6714_246	14.5	A	A	C	A	B	A	A	B	A	B	B	A	B	B	A	C	B	A	B	A	B	A	B	A	A	A	A	A	A	B	A	A	A	A	A	A	A	C	B	A	B	B	B	B
984	5A	65732	IWB65732	TA003745-0632	15.3	A	A	C	A	B	A	A	B	B	B	B	A	B	B	A	B	B	A	B	C	B	A	B	A	A	A	A	A	A	B	A	A	A	B	A	A	A	C	B	A	B	B	B	B
985	5A	66053	IWB66053	TA006089-0703	15.9	A	A	C	A	B	A	A	B	B	B	B	A	B	B	A	A	B	A	B	A	B	A	B	A	A	A	A	A	A	B	A	A	A	A	A	A	A	C	B	A	B	B	B	B
986	5A	80733	IWA7361	wsnp_Ku_c9559_16000086	21.8	A	A	C	A	B	A	A	B	B	B	A	A	B	B	A	A	B	A	B	A	B	A	B	A	A	A	A	A	A	B	A	A	A	C	A	A	B	C	B	A	B	B	B	B
987	5A	77595	IWA3196	wsnp_Ex_c28908_37989067	23.3	A	A	B	A	B	A	A	B	B	B	A	B	B	B	A	B	B	A	B	A	B	A	B	A	A	A	A	A	A	B	A	A	C	B	A	A	B	C	B	A	B	B	B	B
988	5A	79315	IWA5368	wsnp_Ex_rep_c67179_65674582	30.6	A	A	B	A	B	A	A	B	B	B	A	B	B	B	A	B	B	A	B	C	B	A	B	A	A	B	A	A	A	B	A	A	C	B	A	A	B	B	B	A	B	A	B	B
989	5A	35357	IWB35357	IAAV7519	31.1	A	A	B	A	B	A	A	B	B	B	A	B	B	B	A	A	B	A	B	A	B	A	B	A	A	B	A	A	A	B	A	A	A	A	A	A	B	B	B	A	B	A	B	B
990	5A	11853	IWB11853	BS00094095_51	32.8	A	A	B	A	B	A	A	B	B	B	A	B	B	B	A	A	B	A	B	A	B	A	B	A	A	B	B	A	A	B	A	A	A	A	A	B	B	B	B	A	B	A	B	B
991	5A	33331	IWB33331	GENE-3321_201	33.4	A	A	B	A	B	A	A	B	B	B	A	B	B	B	A	B	B	A	B	C	B	A	B	A	A	B	B	A	A	B	A	A	A	B	A	B	B	B	B	A	B	A	B	B
992	5A	23035	IWB23035	Excalibur_c17904_437	33.7	A	A	B	A	B	A	A	B	B	B	A	B	B	B	A	B	B	A	B	A	B	A	B	A	A	B	B	A	A	B	A	A	A	B	A	B	B	B	B	A	B	A	B	B
993	5A	4848	IWB4848	BobWhite_rep_c50145_387	33.9	A	A	B	A	B	A	A	B	B	B	A	B	B	B	A	B	B	A	B	A	B	A	B	A	A	B	B	A	A	B	A	A	C	B	A	B	B	B	B	A	B	A	B	B
994	5A	59634	IWB59634	RAC875_c61887_194	34.5	A	A	B	A	B	A	A	B	B	B	A	B	A	B	A	C	B	A	B	A	B	A	B	A	A	B	B	A	A	B	A	A	A	C	A	B	B	B	B	A	B	A	B	B
995	5A	68312	IWB68312	Tdurum_contig14863_916	37.4	A	A	B	A	B	A	A	B	B	B	A	B	A	B	A	A	B	A	B	A	B	A	B	A	A	B	B	A	A	B	A	A	A	A	A	B	B	B	B	A	B	A	B	B
996	5A	43006	IWB43006	Kukri_c24642_426	38	A	A	B	A	B	A	A	B	B	B	A	B	A	B	A	B	B	A	B	C	B	A	B	A	A	B	B	A	A	B	A	A	C	B	A	B	B	B	B	A	B	A	B	B
997	5A	25073	IWB25073	Excalibur_c31194_404	38.8	A	A	B	A	B	A	A	B	B	B	A	B	A	B	A	B	B	A	B	C	B	A	B	C	A	B	B	A	A	B	A	A	A	C	A	B	B	B	B	A	A	A	B	B
998	5A	32340	IWB32340	GENE-1265_290	39.1	B	A	B	A	B	A	A	B	B	B	A	B	A	B	A	B	B	A	B	A	B	A	B	A	A	B	B	C	A	B	A	A	A	B	A	B	B	B	B	A	A	A	B	B
999	5A	75913	IWA825	wsnp_CAP11_c951_572693	39.4	B	A	B	A	B	A	A	B	B	B	A	B	A	B	A	B	B	A	B	C	B	A	B	A	A	B	B	A	A	B	A	A	C	B	A	B	B	B	B	A	A	A	B	B
1000	5A	46908	IWB46908	Kukri_c61108_900	40.2	B	A	B	A	B	A	A	B	B	B	A	B	A	B	A	A	B	A	B	A	B	A	B	A	A	B	B	A	A	B	A	A	A	A	A	B	B	B	B	A	A	A	B	B
1001	5A	66960	IWB66960	Tdurum_contig11173_79	42	B	A	B	A	B	A	B	B	B	B	A	B	A	B	A	C	B	A	B	A	B	A	B	B	A	B	B	A	A	A	A	A	A	C	A	B	B	B	B	A	A	A	B	B
1002	5A	76689	IWA1973	wsnp_Ex_c15046_23216392	42.2	B	A	B	A	B	A	B	B	B	B	A	B	A	B	A	A	B	A	B	A	B	A	B	B	A	B	B	A	A	A	A	A	A	A	A	B	B	B	B	A	A	A	B	B
1003	5A	63885	IWB63885	RFL_Contig2251_434	43.1	B	A	B	A	B	A	B	B	B	B	A	B	A	B	A	B	B	A	B	C	B	A	B	B	A	B	B	A	A	A	A	A	C	B	A	B	B	B	B	A	A	A	B	B
1004	5A	81308	IWA8154	wsnp_Ra_rep_c69221_66574148	44.8	B	A	B	A	B	A	B	B	B	B	A	B	A	B	A	C	B	A	B	A	B	A	B	B	A	B	B	A	A	A	A	A	A	C	A	B	B	B	B	A	A	A	B	B
1005	5A	7718	IWB7718	BS00029347_51	48.1	B	A	B	A	B	A	B	B	B	B	A	B	A	B	A	C	B	A	B	A	B	A	B	B	A	B	B	A	A	A	A	A	A	C	A	B	B	B	B	A	A	A	B	B
1006	5A	76153	IWA1301	wsnp_Ex_c10231_16783750	48.4	B	A	B	A	B	A	B	B	B	B	A	B	A	B	A	C	B	A	B	A	B	A	B	B	A	B	B	A	A	B	A	A	A	C	A	B	B	B	B	A	A	A	B	B
1007	5A	31051	IWB31051	Excalibur_rep_c69282_651	49.2	B	A	B	A	B	A	B	B	B	B	A	B	A	B	A	A	B	A	B	A	A	B	B	B	A	B	C	A	A	B	C	A	A	A	A	B	B	B	B	A	A	A	B	B
1008	5A	8975	IWB8975	BS00062996_51	50.1	B	A	B	A	B	A	B	B	B	B	A	B	A	B	A	B	B	A	B	A	A	B	B	B	A	B	C	A	A	B	C	A	A	B	A	B	B	B	B	A	A	A	B	B
1009	5A	78786	IWA4710	wsnp_Ex_c7668_13089715	50.3	B	A	B	A	B	A	B	B	B	B	A	B	A	B	A	B	B	A	B	A	A	B	B	B	A	B	C	A	A	B	C	A	A	B	A	B	B	B	B	A	A	A	B	B
1010	5A	81559	IWA8582	wsnp_RFL_Contig4307_5006558	50.9	B	A	B	A	B	A	B	B	B	B	A	B	A	B	A	B	B	A	B	A	A	B	B	B	A	B	C	A	A	B	C	A	A	A	A	B	B	B	B	A	A	A	B	B
1011	5A	77068	IWA2467	wsnp_Ex_c19820_28829623	51.2	B	A	B	A	B	A	B	B	B	B	A	B	A	B	A	B	B	A	B	C	A	B	B	B	A	B	C	A	A	B	C	A	A	B	A	C	B	B	B	A	A	A	B	C
1012	5A	30993	IWB30993	Excalibur_rep_c68784_1193	51.5	B	A	B	A	B	A	B	B	B	B	A	B	A	B	A	B	B	A	B	A	A	B	B	B	A	B	C	A	A	B	C	A	C	B	A	B	B	B	B	A	A	A	B	B
1013	5A	26943	IWB26943	Excalibur_c4834_1733	52	B	A	B	A	B	A	B	B	B	B	A	B	A	B	A	B	B	A	B	C	A	B	B	B	A	B	C	A	A	B	C	A	A	B	A	B	B	B	B	A	A	A	B	B
1014	5A	65499	IWB65499	TA002096-0945	53.8	B	A	B	A	B	A	B	B	B	B	A	B	A	B	A	B	B	A	B	A	A	B	B	B	A	B	B	A	A	B	A	A	A	A	A	B	B	B	B	A	A	A	B	B
1015	5A	79441	IWA5538	wsnp_Ex_rep_c68515_67349716	54.6	B	A	B	A	B	A	B	B	B	B	A	B	A	B	A	B	B	A	B	B	A	B	B	B	A	B	B	A	A	B	A	A	C	B	A	B	B	B	B	A	A	A	B	B
1016	5A	1040	IWB1040	BobWhite_c17440_130	55.8	B	A	B	A	B	A	B	B	B	B	A	B	A	B	A	B	B	A	B	A	B	B	B	B	A	A	B	A	A	B	A	A	A	B	A	B	B	B	B	A	A	A	B	B
1017	5A	79684	IWA5884	wsnp_JD_c1796_2496653	56.4	B	A	B	A	B	A	B	B	B	B	A	B	A	B	A	B	B	A	B	A	B	B	B	B	A	A	B	A	A	B	A	A	A	B	A	B	B	B	B	A	A	A	B	B
1018	5A	61122	IWB61122	RAC875_c95309_460	56.7	B	A	B	A	B	A	B	B	B	B	A	B	A	B	A	B	B	A	B	A	B	A	B	B	A	A	B	A	A	B	A	A	A	B	A	B	B	B	B	A	A	A	B	B
1019	5A	9838	IWB9838	BS00066569_51	56.9	B	A	B	A	B	A	B	B	B	B	A	B	A	B	A	B	B	A	B	A	B	A	B	B	A	A	B	A	A	B	A	A	A	B	A	B	B	B	B	A	A	A	B	B
1020	5A	688	IWB688	BobWhite_c14705_487	57.2	B	A	B	A	B	A	B	B	B	B	A	B	A	B	A	B	B	A	B	C	B	A	B	B	A	A	B	A	A	B	A	A	C	B	A	B	B	B	B	A	A	A	B	B
1021	5A	71919	IWB71919	Tdurum_contig48766_257	58.1	B	A	B	A	B	A	B	B	B	B	A	B	A	B	A	B	B	A	B	A	B	A	B	B	B	A	B	A	A	B	A	A	A	C	A	B	B	B	B	A	A	A	B	B
1022	5A	12396	IWB12396	BS00109052_51	58.4	B	A	B	A	B	A	B	B	B	B	A	B	A	B	A	B	B	A	B	A	B	A	B	B	B	A	B	A	A	B	A	A	A	C	A	B	B	B	B	A	A	A	B	B
1023	5A	21005	IWB21005	Ex_c6161_335	58.9	B	A	B	B	B	A	B	B	B	B	A	B	A	B	A	B	B	A	B	A	B	A	B	B	B	A	B	A	A	B	A	A	A	B	A	B	B	B	B	A	A	A	B	A
1024	5A	79323	IWA5380	wsnp_Ex_rep_c67292_65834396	59.5	B	A	B	B	B	A	B	B	B	B	A	B	A	B	A	B	B	A	B	C	B	A	B	B	B	A	B	A	A	B	A	A	A	B	A	B	B	B	B	A	A	A	B	A
1025	5A	10855	IWB10855	BS00076190_51	59.8	B	A	B	B	B	A	B	B	B	B	A	B	A	B	A	B	B	A	B	A	B	A	B	B	B	A	B	A	A	B	A	A	A	A	A	B	B	B	B	A	A	A	B	A
1026	5A	77393	IWA2926	wsnp_Ex_c2474_4619730	60	B	A	B	B	B	A	B	B	B	B	A	B	A	B	A	B	B	A	B	A	B	A	B	B	B	A	B	A	A	B	A	A	A	A	A	B	B	B	B	A	A	A	B	A
1027	5A	81033	IWA7773	wsnp_Ra_c23878_33418076	62	B	A	B	B	B	A	A	B	B	B	A	B	A	B	A	B	B	A	B	A	B	A	B	B	B	A	B	A	A	B	A	A	A	B	A	B	B	B	B	A	A	A	B	A
1028	5A	77049	IWA2445	wsnp_Ex_c19647_28632659	62.8	B	A	B	B	B	A	A	B	B	B	A	B	A	B	A	B	B	A	B	B	B	A	B	B	B	A	B	A	A	B	A	A	A	B	A	B	B	B	B	A	C	A	B	A
1029	5A	53498	IWB53498	RAC875_c1219_1258	65.7	B	A	B	B	B	A	A	B	B	B	A	B	A	B	A	B	B	A	B	B	A	A	B	B	B	A	B	A	A	B	A	A	A	C	B	B	B	B	B	B	C	A	B	B
1030	5A	20824	IWB20824	Ex_c4921_742	66	B	A	B	B	B	A	A	B	B	B	A	B	A	B	A	B	B	A	B	C	A	A	B	B	B	A	B	A	A	B	A	A	A	A	B	B	B	B	B	B	C	A	B	B
1031	5A	2190	IWB2190	BobWhite_c28317_190	66.6	B	A	B	B	B	A	A	B	B	B	A	B	A	B	A	B	B	A	B	B	A	A	B	B	B	A	B	A	A	B	A	A	A	C	B	B	B	B	B	B	C	A	B	B
1032	5A	34728	IWB34728	IAAV3514	66.8	B	A	B	B	B	A	A	B	B	B	A	B	A	B	A	B	B	A	B	B	A	A	B	B	B	A	B	A	A	B	A	A	A	A	B	B	B	B	B	B	B	A	B	B
1033	5A	12933	IWB12933	CAP11_c528_76	68.2	B	A	B	B	B	A	A	B	B	B	A	B	A	B	A	B	B	A	B	B	A	A	B	B	B	A	B	A	A	B	A	A	A	A	B	B	B	B	B	B	C	A	C	C
1034	5A	49048	IWB49048	Kukri_rep_c104877_2166	68.5	B	A	B	B	B	A	A	B	B	B	A	B	A	B	A	B	B	A	B	B	A	A	B	B	B	A	B	A	A	B	A	A	A	B	B	B	B	B	B	B	C	A	C	B
1035	5A	39499	IWB39499	Ku_c47168_563	70.9	B	A	B	B	B	A	A	B	B	B	A	B	A	B	A	B	B	A	B	B	A	A	B	B	B	B	B	A	A	B	A	A	C	B	B	B	A	B	B	B	C	A	C	B
1036	5A	31570	IWB31570	Excalibur_s114708_55	71.7	B	A	B	B	B	A	A	B	B	B	A	A	A	B	A	B	B	A	B	A	A	A	B	B	B	B	B	A	A	B	A	A	A	B	B	B	A	B	B	B	C	A	C	B
1037	5A	78720	IWA4629	wsnp_Ex_c7168_12311649	72.3	B	A	B	B	B	A	A	B	B	B	A	A	A	B	A	B	B	A	B	C	A	A	B	B	B	B	B	A	A	B	A	A	A	A	B	B	A	B	B	B	C	A	C	B
1038	5A	76456	IWA1686	wsnp_Ex_c1279_2451699	72.5	B	A	B	B	B	A	A	B	B	B	A	A	A	B	A	B	B	A	B	C	A	A	B	B	B	B	B	A	A	B	A	A	A	A	B	B	A	A	B	B	C	A	C	B
1039	5A	80423	IWA6949	wsnp_Ku_c35386_44598937	72.8	B	A	B	B	B	A	A	B	B	B	A	A	A	B	A	B	B	A	B	C	A	A	B	B	B	B	B	A	A	B	A	A	A	A	B	B	A	A	B	B	C	A	C	B
1040	5A	33345	IWB33345	GENE-3344_224	73.1	B	A	B	B	B	A	A	B	B	B	A	A	A	B	A	B	B	A	B	B	A	A	B	B	B	B	B	A	A	B	A	A	A	C	B	B	A	A	B	B	C	A	A	B
1041	5A	22035	IWB22035	Excalibur_c1208_72	74.5	B	A	B	B	B	A	A	B	B	B	A	A	A	B	A	B	B	A	B	B	A	A	B	B	B	B	B	A	A	B	A	B	A	B	B	B	A	A	B	B	C	A	C	B
1042	5A	75517	IWA263	wsnp_BE495277A_Ta_2_5	76.8	B	A	B	B	B	A	A	B	B	B	A	A	A	B	A	A	B	A	B	B	A	A	B	B	B	B	B	B	A	B	A	B	A	B	A	B	A	A	B	B	B	B	C	B
1043	5A	52993	IWB52993	RAC875_c10310_1486	77.4	B	A	B	B	B	A	A	B	B	B	A	A	A	B	A	A	B	A	B	C	A	A	B	B	B	B	B	B	A	B	A	B	A	A	A	B	A	A	B	B	B	B	C	B
1044	5A	5565	IWB5565	BobWhite_rep_c65811_114	77.7	B	A	B	B	B	A	A	B	B	B	A	A	A	B	A	A	B	A	B	B	A	A	B	B	B	B	B	B	A	B	A	B	A	B	A	B	A	A	B	B	B	B	C	B
1045	5A	233	IWB233	BobWhite_c11512_157	78.2	B	A	B	B	B	A	A	B	B	B	A	A	A	B	A	A	B	A	B	B	A	A	B	B	B	B	B	B	A	B	A	B	A	B	A	B	A	A	B	B	B	B	C	A
1046	5A	52461	IWB52461	Ra_c6930_1753	79.1	B	A	B	B	B	A	A	B	B	B	A	A	A	B	A	A	B	A	B	C	A	A	B	A	B	B	B	B	A	B	A	B	A	A	A	B	A	A	B	B	B	B	C	A
1047	5A	29626	IWB29626	Excalibur_c9846_1720	80.5	A	A	B	B	B	A	A	B	B	B	A	A	A	B	A	A	B	A	B	C	A	A	B	A	B	B	B	B	A	B	A	B	A	A	A	B	A	A	B	B	B	B	C	A
1048	5A	73631	IWB73631	Tdurum_contig83412_270	81.3	A	A	B	B	B	A	A	B	B	B	A	B	A	B	A	A	B	A	B	B	A	A	B	A	B	B	B	B	A	B	A	B	A	C	A	A	A	A	B	B	B	B	C	A
1049	5A	75269	IWB75269	tplb0060m15_257	82.2	A	A	B	B	B	A	A	B	B	B	A	B	A	B	A	A	B	A	B	B	A	A	B	A	B	B	B	B	A	B	A	B	A	B	A	A	A	A	B	B	B	B	A	A
1050	5A	72977	IWB72977	Tdurum_contig64337_158	82.4	A	A	B	B	B	A	A	B	B	B	A	B	A	B	A	A	B	A	B	B	A	A	B	A	B	B	B	B	A	B	A	B	A	A	A	A	A	A	B	B	B	B	A	A
1051	5A	50648	IWB50648	Kukri_s112978_54	83.3	A	A	B	B	B	A	A	B	B	B	A	B	A	B	A	A	B	A	B	B	A	A	B	A	B	B	B	B	A	B	A	B	A	A	A	A	B	A	B	B	B	B	A	A
1052	5A	68661	IWB68661	Tdurum_contig17500_876	83.6	A	A	B	B	B	A	A	B	B	B	A	B	A	B	A	A	B	A	B	B	A	A	B	C	B	B	B	B	A	B	A	B	A	A	A	A	B	A	B	B	B	B	A	A
1053	5A	45155	IWB45155	Kukri_c41594_74	87.8	A	A	B	B	B	B	A	B	B	B	A	A	A	B	A	A	B	A	B	B	A	A	A	A	B	B	B	B	A	B	A	B	A	B	A	A	B	A	B	B	A	B	A	A
1054	5A	42941	IWB42941	Kukri_c24211_1034	88.3	A	A	B	B	B	B	A	B	B	B	A	A	A	B	A	A	B	A	B	B	A	A	A	A	B	B	B	B	A	B	A	B	A	B	A	A	B	A	B	B	A	B	A	A
1055	5A	27298	IWB27298	Excalibur_c52167_355	88.9	A	A	B	B	B	B	A	B	B	B	A	A	A	B	A	A	B	A	B	B	A	A	A	A	B	B	B	B	A	B	A	B	A	C	A	A	B	A	B	B	A	B	A	A
1056	5A	6708	IWB6708	BS00021678_51	89.2	A	A	B	B	B	B	A	B	B	B	A	A	A	B	A	A	B	A	B	C	A	A	A	A	B	B	B	B	A	B	A	B	A	A	A	A	B	A	A	B	A	B	A	A
1057	5A	10117	IWB10117	BS00067676_51	90	A	A	B	B	B	B	A	B	B	B	A	A	A	B	A	A	B	A	B	B	A	A	A	A	B	B	B	B	A	B	A	B	A	C	A	A	B	A	A	B	A	B	A	B
1058	5A	34534	IWB34534	IAAV2328	90.3	A	A	B	B	B	B	A	B	B	B	A	A	A	B	A	A	B	A	B	B	A	A	A	A	B	B	B	B	A	B	A	B	A	B	A	A	B	A	A	B	A	B	A	B
1059	5A	78229	IWA3996	wsnp_Ex_c47684_52820187	91.2	A	A	B	B	B	B	A	B	B	B	A	A	A	B	A	A	B	A	B	B	A	A	A	A	B	B	B	B	A	B	A	B	A	B	A	A	B	A	A	B	A	B	A	B
1060	5A	4234	IWB4234	BobWhite_c6782_180	92.6	A	A	B	B	B	B	A	B	B	B	A	A	A	B	A	A	B	A	B	B	A	A	A	A	B	B	B	B	A	B	A	B	C	B	A	A	B	A	A	A	A	B	A	B
1061	5A	55492	IWB55492	RAC875_c23340_2243	92.8	A	A	B	B	B	B	A	B	B	B	A	A	A	B	A	A	B	A	B	B	A	A	A	A	B	B	B	B	A	B	A	B	A	A	A	A	B	A	A	A	A	B	A	B
1062	5A	35938	IWB35938	IACX3911	93.1	A	A	B	B	B	B	A	B	B	B	A	A	A	B	A	A	B	A	B	B	A	A	A	A	B	B	B	B	A	B	A	B	A	A	A	A	B	A	A	A	A	B	A	B
1063	5A	73294	IWB73294	Tdurum_contig75699_1053	94.2	A	A	B	B	B	B	A	B	B	B	A	A	A	B	A	A	A	A	B	B	A	A	A	A	B	B	B	B	A	B	B	B	A	C	A	A	B	A	A	A	A	B	A	B
1064	5A	59852	IWB59852	RAC875_c64253_435	94.5	A	A	B	B	B	B	A	B	B	B	A	A	A	B	A	A	A	A	B	B	A	A	A	A	B	B	B	B	A	B	B	B	A	B	A	A	B	A	A	A	A	B	A	B
1065	5A	25846	IWB25846	Excalibur_c37642_800	95.6	A	A	B	B	B	B	A	B	B	B	A	A	A	B	A	A	A	A	B	B	A	A	A	A	B	B	B	B	A	B	B	B	A	B	A	A	B	A	A	A	A	A	A	B
1066	5A	46889	IWB46889	Kukri_c60913_155	97.6	A	A	B	B	B	B	A	B	B	B	A	A	A	B	A	C	A	A	B	B	A	A	A	A	B	B	B	B	A	B	B	B	A	C	A	A	B	A	A	A	A	A	A	A
1067	5A	66355	IWB66355	Tdurum_contig10210_425	97.9	A	A	B	B	B	B	A	B	B	B	A	A	A	B	A	C	A	A	B	C	A	A	A	A	B	B	B	B	A	B	B	B	A	A	A	A	B	A	A	A	A	A	A	A
1068	5A	43526	IWB43526	Kukri_c28080_887	98.2	A	A	B	B	B	B	A	B	B	B	A	A	A	B	A	C	A	A	B	B	A	A	A	A	B	B	B	B	A	B	B	B	A	B	A	A	B	A	A	A	A	A	A	A
1069	5A	79504	IWA5624	wsnp_Ex_rep_c69647_68598487	98.8	A	A	B	B	B	B	A	B	B	B	A	A	A	B	A	B	A	A	B	B	A	A	A	A	B	B	C	B	A	B	B	B	C	B	C	A	B	A	A	A	A	A	A	C
1070	5A	7746	IWB7746	BS00029871_51	99.1	A	A	B	B	B	B	A	B	B	B	A	A	A	B	A	C	A	A	B	B	A	A	A	A	B	B	B	B	A	B	B	B	A	C	A	A	B	A	A	A	A	A	A	A
1071	5A	38386	IWB38386	Ku_c13370_656	99.3	A	A	B	B	B	B	A	B	B	B	A	A	A	B	A	C	A	A	B	B	A	A	A	A	B	B	B	B	A	B	B	B	A	C	A	B	B	A	A	A	A	A	A	A
1072	5A	71521	IWB71521	Tdurum_contig44343_1039	99.6	A	A	B	B	B	B	A	B	B	B	A	A	A	B	A	C	A	A	B	B	A	A	A	A	B	B	B	B	A	B	B	B	C	C	A	B	B	A	A	A	A	A	A	A
1073	5A	6049	IWB6049	BS00009369_51	100.4	A	A	B	B	B	B	A	B	B	B	A	A	A	B	A	C	A	A	B	B	B	A	A	A	B	B	B	B	A	B	B	B	A	B	A	B	B	A	A	A	A	A	A	A
1074	5A	10726	IWB10726	BS00074299_51	103.7	A	A	B	B	B	B	A	B	B	B	A	A	A	A	A	C	A	A	B	B	B	A	A	C	B	B	B	C	A	B	B	B	A	C	C	B	A	A	A	A	A	A	B	A
1075	5A	35164	IWB35164	IAAV619	104	A	A	B	B	B	B	A	B	B	B	A	A	A	A	A	C	A	A	B	B	B	A	A	B	B	B	B	C	A	B	B	B	A	B	C	B	A	A	A	A	A	A	B	A
1076	5A	78793	IWA4719	wsnp_Ex_c7729_13177883	105.1	A	A	B	B	B	B	A	B	B	B	A	A	A	A	A	C	A	A	A	B	B	A	A	B	B	B	B	C	A	B	B	B	A	B	C	B	A	A	A	A	A	A	B	A
1077	5A	20403	IWB20403	Ex_c2840_1013	105.4	A	A	B	B	B	B	A	B	B	B	A	A	A	A	A	B	A	A	A	B	B	A	A	B	B	B	B	C	A	B	B	B	A	A	C	B	C	A	A	A	A	A	B	A
1078	5A	79251	IWA5287	wsnp_Ex_rep_c66689_65010988	106	A	A	B	B	B	B	A	B	B	B	A	A	A	A	A	C	A	A	A	B	B	A	A	B	B	B	B	C	A	B	B	B	A	B	C	B	B	A	A	A	A	A	B	A
1079	5A	61908	IWB61908	RAC875_rep_c109716_67	106.2	A	A	B	B	B	B	A	B	B	B	A	A	A	A	A	C	A	A	A	B	B	A	A	B	B	B	B	C	A	A	B	B	A	B	C	B	B	A	A	A	A	A	B	A
1080	5A	40810	IWB40810	Kukri_c12384_430	106.5	A	A	B	B	B	B	A	B	B	B	A	A	A	A	A	A	A	A	A	B	B	A	A	B	B	B	B	A	A	A	B	B	A	B	A	B	B	A	A	A	A	A	B	A
1081	5A	76913	IWA2256	wsnp_Ex_c17763_26513562	108.2	A	A	B	B	B	B	A	B	B	B	A	A	A	A	A	C	A	A	A	C	B	A	A	B	B	B	B	C	A	A	B	B	A	A	C	B	B	A	A	A	A	A	B	A
1082	5A	12839	IWB12839	CAP11_c3209_76	108.8	A	A	B	B	B	B	A	B	B	B	A	A	A	B	A	C	A	A	A	B	B	A	A	B	B	B	B	C	A	A	B	B	A	B	C	B	B	A	A	A	A	A	B	A
1083	5A	66780	IWB66780	Tdurum_contig10843_745	109.6	A	A	B	B	B	B	A	B	B	B	A	A	A	B	A	C	A	A	A	B	B	A	A	B	B	B	B	C	A	A	B	B	A	B	C	B	B	A	A	A	A	A	B	A
1084	5A	74800	IWB74800	tplb0044j06_689	109.9	A	A	B	B	B	B	A	B	B	B	A	A	A	B	A	C	A	A	A	B	B	A	A	B	B	B	B	C	A	A	B	B	A	B	C	B	B	A	A	A	A	A	B	A
1085	5A	1041	IWB1041	BobWhite_c17445_83	111.3	A	A	A	B	B	B	A	B	B	B	A	A	A	B	A	C	A	A	A	B	B	A	A	B	B	B	B	C	A	A	B	B	C	B	C	B	B	A	A	A	A	A	B	A
1086	5A	75736	IWA576	wsnp_BG606780A_Td_2_1	114.3	B	A	A	B	B	B	A	B	B	B	A	A	A	B	A	C	A	A	A	B	B	A	A	B	B	B	A	C	A	A	B	B	A	C	C	B	B	A	A	A	A	A	B	A
1087	5A	12711	IWB12711	CAP11_c1685_149	115.1	B	A	A	B	B	B	A	B	B	B	A	A	A	B	A	C	A	A	A	B	B	A	A	B	B	B	A	C	A	A	B	B	A	C	C	B	B	A	A	A	A	A	B	A
1088	5A	78004	IWA3705	wsnp_Ex_c40019_47166980	115.7	B	A	A	B	B	B	A	B	B	B	A	A	A	B	A	B	A	A	A	B	B	A	A	B	B	B	A	C	A	A	B	B	A	B	C	B	B	A	A	A	A	A	B	A
1089	5A	5457	IWB5457	BobWhite_rep_c64315_180	116	B	A	A	B	B	B	A	B	B	B	A	A	A	B	A	B	A	A	A	B	B	A	A	B	B	B	A	C	A	A	B	B	A	B	C	B	B	A	A	A	A	A	B	A
1090	5A	912	IWB912	BobWhite_c16397_524	116.9	B	A	A	B	B	B	B	B	B	B	A	A	A	B	A	C	A	A	A	B	B	A	A	B	B	B	A	C	A	A	B	B	A	C	C	B	B	A	A	A	A	A	B	A
1091	5A	15392	IWB15392	D_contig06709_822	117.1	B	A	A	B	B	B	B	B	B	B	A	A	A	B	A	B	A	A	A	A	B	A	A	B	B	B	A	A	A	A	B	B	A	B	A	B	B	A	A	A	A	A	B	A
1092	5A	71377	IWB71377	Tdurum_contig42905_282	118	B	A	A	B	B	B	B	B	B	B	A	A	A	B	A	B	A	A	A	B	B	A	A	B	B	A	A	C	A	A	B	B	A	C	C	B	B	A	A	A	A	A	B	A
1093	5A	59523	IWB59523	RAC875_c60453_122	118.6	B	A	A	B	B	B	B	B	B	B	A	A	A	B	A	B	A	A	A	B	B	A	A	B	B	A	A	C	A	A	B	B	A	B	C	B	B	A	A	B	A	A	B	A
1094	5A	76124	IWA1258	wsnp_CD454152A_Ta_2_1	120	B	B	A	B	B	B	B	B	B	B	A	A	A	B	A	B	A	A	A	B	A	A	A	B	B	A	A	C	A	A	B	B	C	B	C	B	B	A	A	B	A	A	B	A
1095	5A	12226	IWB12226	BS00104432_51	124	B	B	A	B	B	B	B	B	B	B	A	A	A	B	A	B	A	B	A	B	A	A	A	B	B	A	A	C	A	A	B	B	C	C	C	B	B	A	A	B	A	A	B	A
1096	5A	12442	IWB12442	BS00109908_51	124.3	B	B	A	B	B	B	B	B	B	B	A	A	A	B	A	B	A	B	A	B	A	A	A	B	B	A	A	C	A	B	B	B	A	A	C	B	B	A	A	B	A	A	B	A
1097	5A	43714	IWB43714	Kukri_c29475_380	124.5	B	B	A	B	B	B	B	B	B	B	A	A	A	B	A	B	A	B	A	B	A	A	A	B	B	A	A	C	A	B	B	B	A	B	C	B	B	A	A	B	A	A	B	A
1098	5A	43581	IWB43581	Kukri_c28555_114	124.8	B	B	A	B	B	B	B	B	B	B	A	A	A	B	A	B	A	B	A	B	A	A	A	B	B	A	A	C	A	B	B	B	C	B	C	B	B	A	A	B	A	A	B	A
1099	5A	76804	IWA2113	wsnp_Ex_c16295_24772663	133.6	B	B	A	A	B	B	B	A	B	B	B	A	B	B	B	C	A	B	A	C	A	A	A	B	B	B	B	A	B	B	B	B	C	B	C	B	B	A	A	B	A	A	B	A
1100	5A	34731	IWB34731	IAAV3527	133.9	B	B	A	A	B	B	B	A	B	B	B	A	B	B	B	C	A	B	A	A	A	A	A	B	B	B	B	A	B	B	B	B	A	A	C	B	B	A	A	B	A	A	B	A
1101	5A	15035	IWB15035	CAP8_rep_c4852_130	134.4	B	B	A	A	B	B	B	A	B	B	B	A	B	B	B	C	A	B	A	A	A	A	A	B	B	B	B	A	B	B	B	B	A	B	A	B	B	A	A	B	A	A	B	A
1102	5A	15981	IWB15981	D_contig19808_203	135	B	B	A	A	B	B	B	A	B	B	B	A	B	B	B	C	A	B	A	A	A	A	A	B	A	B	B	A	B	B	B	B	A	B	A	B	B	A	A	B	A	A	B	A
1103	5A	65415	IWB65415	TA001523-1009	135.3	B	B	A	A	B	B	B	A	B	B	B	A	B	B	B	C	A	B	A	A	A	A	A	B	A	B	B	A	B	B	B	B	A	A	A	B	B	A	A	B	A	A	B	A
1104	5A	61152	IWB61152	RAC875_c9617_395	135.5	B	B	A	A	B	B	B	A	B	B	B	A	B	B	B	C	A	B	A	A	A	A	A	B	A	B	B	A	B	B	B	B	A	A	A	B	B	A	A	B	A	A	B	A
1105	5A	77703	IWA3323	wsnp_Ex_c31154_39982416	136.4	B	B	A	A	B	B	B	A	B	B	B	A	B	B	B	C	A	B	A	A	A	A	A	B	A	B	B	A	B	B	B	B	A	C	A	B	B	A	A	B	A	A	B	A
1106	5A	54225	IWB54225	RAC875_c16137_633	136.9	B	B	A	A	B	B	B	A	B	B	B	A	B	B	B	A	C	B	A	A	A	A	A	B	A	B	B	A	B	B	B	A	A	C	A	B	B	A	A	B	A	A	B	A
1107	5A	59300	IWB59300	RAC875_c57603_144	137.2	B	B	A	A	B	B	B	A	B	B	B	A	B	B	B	A	C	B	A	A	C	A	A	B	A	B	B	A	B	B	B	A	A	B	A	B	B	A	A	B	A	A	B	A
1108	5A	11590	IWB11590	BS00089076_51	137.7	B	B	A	B	B	B	B	A	B	B	B	A	B	B	B	A	C	B	A	A	C	A	A	B	A	B	B	A	B	B	B	A	A	B	A	B	B	A	A	B	A	A	B	A
1109	5A	11245	IWB11245	BS00082219_51	138	B	B	A	B	B	B	B	A	B	B	B	A	B	B	B	A	C	B	A	A	C	A	A	A	A	B	B	A	B	B	B	A	A	C	A	B	B	A	A	B	A	A	B	A
1110	5A	29171	IWB29171	Excalibur_c8647_252	138.3	B	B	A	B	B	B	C	A	B	B	B	A	B	B	B	A	C	B	A	A	A	A	A	B	A	B	B	A	B	C	B	A	A	A	A	B	B	A	A	B	A	A	B	A
1111	5A	9130	IWB9130	BS00063793_51	140	B	B	A	B	B	B	B	A	B	B	B	A	B	B	B	A	C	B	A	A	A	A	A	A	A	B	B	A	B	B	B	A	A	C	A	B	B	A	A	B	A	A	B	A
1112	5A	54928	IWB54928	RAC875_c19999_341	140.3	B	B	A	B	B	B	B	A	B	B	B	A	B	B	B	A	C	B	A	A	A	A	A	A	A	B	B	A	B	B	B	A	A	C	A	B	B	A	A	B	A	A	B	A
1113	5A	5368	IWB5368	BobWhite_rep_c63332_67	140.6	B	B	A	B	B	B	B	A	B	B	B	A	B	B	B	A	C	B	A	A	A	C	A	A	A	B	B	A	B	B	B	A	A	C	A	B	B	A	A	B	A	A	B	A
1114	5A	69108	IWB69108	Tdurum_contig25487_857	141.1	B	B	A	B	B	B	B	A	B	B	B	A	B	C	B	A	C	B	A	A	A	A	A	A	A	B	B	A	B	B	B	A	A	A	A	B	B	A	A	B	A	A	B	A
1115	5A	10802	IWB10802	BS00075379_51	141.7	B	B	A	B	B	B	B	A	B	B	B	A	B	C	B	A	C	B	A	A	A	A	A	A	A	B	B	A	B	B	B	A	A	B	A	B	B	A	A	B	A	A	B	A
1116	5A	64432	IWB64432	RFL_Contig3629_1465	142	B	B	A	B	B	B	B	A	B	B	B	A	B	C	B	A	C	B	A	A	A	A	A	A	A	B	B	A	B	B	B	A	A	C	A	B	B	A	A	B	A	A	B	A
1117	5A	4836	IWB4836	BobWhite_rep_c50013_65	142.2	B	B	A	B	B	B	B	A	B	B	B	A	B	C	B	A	C	B	A	A	A	A	A	A	A	B	B	A	B	B	B	A	A	B	A	B	B	A	A	B	A	A	A	A
1118	5A	5178	IWB5178	BobWhite_rep_c57286_122	142.8	B	B	A	B	B	B	B	A	B	B	B	A	B	C	B	A	C	B	A	A	A	A	A	A	A	B	B	A	B	B	B	A	A	A	A	B	B	A	A	B	A	A	A	A
1119	5A	7409	IWB7409	BS00023070_51	143.1	B	B	A	B	B	B	B	A	B	B	B	A	B	C	B	A	C	B	A	A	A	A	A	A	A	B	B	A	B	B	B	A	A	C	A	B	B	A	A	B	A	A	A	A
1120	5A	13571	IWB13571	CAP12_c956_61	143.9	B	B	A	B	B	B	B	A	B	B	B	A	B	C	B	A	C	B	A	A	A	A	A	A	A	B	B	A	B	B	B	A	A	C	A	B	B	A	A	B	A	A	A	A
1121	5A	14333	IWB14333	CAP7_c9530_138	144.2	B	B	A	B	B	B	B	A	B	B	B	A	B	C	B	A	C	B	A	A	A	A	A	A	A	B	B	A	B	B	B	A	A	C	A	B	C	A	A	B	A	A	A	A
1122	5A	79015	IWA5003	wsnp_Ex_rep_c101323_86702546	145	B	B	A	B	B	B	B	A	B	B	B	A	B	C	B	A	C	B	A	A	A	A	A	A	A	B	B	A	B	B	B	A	A	A	A	B	B	A	A	B	A	A	A	A
1123	5A	79014	IWA5002	wsnp_Ex_rep_c101323_86702413	145.6	B	B	A	B	B	B	B	A	B	B	B	A	B	C	B	A	C	B	A	A	A	A	A	A	A	B	B	A	B	B	B	A	A	B	A	B	B	A	A	B	A	A	A	A
1124	5A	14077	IWB14077	CAP7_c4064_162	150.2	B	B	A	B	A	B	B	A	A	B	B	A	B	C	B	A	C	B	A	A	A	A	A	A	A	B	B	A	B	B	B	A	A	C	A	B	C	A	A	B	A	A	B	A
1125	5A	7449	IWB7449	BS00023152_51	150.7	B	B	A	B	A	B	B	A	A	B	B	A	B	A	B	A	C	B	A	A	A	A	A	A	A	B	B	A	B	C	B	A	A	B	A	B	A	A	A	B	A	A	B	A
1126	5A	9620	IWB9620	BS00065714_51	151	B	B	A	B	A	B	B	A	A	B	B	A	B	C	B	A	C	B	A	A	A	A	A	A	A	B	B	A	B	C	B	A	A	B	A	B	C	A	A	B	A	A	B	A
1127	5A	30349	IWB30349	Excalibur_rep_c108520_84	154.7	B	B	A	B	A	B	B	A	A	B	B	A	B	A	B	A	B	B	A	A	C	A	A	A	A	A	B	C	B	B	B	A	B	C	A	B	A	A	A	B	A	A	B	C
1128	5A	73634	IWB73634	Tdurum_contig8348_831	155.3	B	B	A	B	A	B	B	A	A	B	B	A	B	A	B	A	B	B	A	A	C	A	B	A	A	A	B	A	B	B	B	A	B	C	A	B	A	A	A	B	A	A	B	A
1129	5A	69406	IWB69406	Tdurum_contig28001_110	155.9	B	B	A	B	A	B	C	A	A	B	B	A	B	A	B	A	C	B	A	A	C	A	B	A	A	A	B	A	B	B	B	A	B	C	A	B	A	A	A	B	A	A	B	A
1130	5B	28541	IWB28541	Excalibur_c6967_1852	0	A	A	A	A	A	B	A	A	B	A	A	A	B	A	A	A	A	A	A	C	A	A	A	B	A	A	A	A	A	A	A	A	A	A	A	A	B	A	B	A	A	B	A	B
1131	5B	60572	IWB60572	RAC875_c79649_582	3.6	A	A	A	A	A	B	A	A	B	A	A	B	B	A	A	A	A	A	A	A	A	A	A	B	A	A	A	A	A	B	A	A	C	A	A	A	B	A	B	A	A	B	A	B
1132	5B	71482	IWB71482	Tdurum_contig44048_276	7.9	B	A	A	A	A	B	A	A	B	A	A	B	B	A	A	A	A	A	A	A	B	A	A	B	A	A	B	A	A	B	A	A	C	A	B	A	B	A	B	A	A	B	A	B
1133	5B	56396	IWB56396	RAC875_c29907_293	8.4	B	A	A	A	A	B	A	A	B	A	A	B	B	A	A	A	A	A	A	A	B	A	A	B	A	A	B	A	A	B	A	A	C	A	B	A	B	A	B	A	A	B	A	B
1134	5B	33287	IWB33287	GENE-3207_134	9.8	B	A	A	A	A	B	A	A	B	A	A	B	B	A	A	C	A	A	A	A	B	A	A	B	A	A	B	A	A	B	A	B	C	A	B	A	B	A	B	A	A	B	A	B
1135	5B	21933	IWB21933	Excalibur_c11605_156	10.1	B	A	A	A	A	B	A	A	B	A	A	B	B	A	A	B	A	A	A	C	B	C	A	B	A	C	B	A	A	B	A	B	B	A	B	A	B	A	B	A	A	B	A	B
1136	5B	69077	IWB69077	Tdurum_contig25432_1020	11.3	B	A	A	A	A	B	A	A	B	A	A	B	B	A	A	B	A	A	A	C	B	A	A	B	A	A	B	A	A	B	A	B	B	C	B	A	B	A	B	A	A	B	A	B
1137	5B	75624	IWA420	wsnp_BF201102B_Ta_2_1	12.1	C	A	A	A	A	B	A	A	B	A	A	B	B	A	A	C	A	A	A	A	B	A	A	B	A	A	B	A	A	B	A	B	C	A	B	A	B	A	B	A	A	B	A	B
1138	5B	48848	IWB48848	Kukri_rep_c103150_398	14.7	C	A	A	A	A	B	B	A	B	A	A	B	B	A	A	B	A	A	A	A	B	A	A	B	A	A	B	A	A	B	A	B	C	A	B	A	B	A	B	A	A	B	A	B
1139	5B	14332	IWB14332	CAP7_c9506_174	15.3	C	A	A	A	A	B	B	A	B	A	A	B	B	A	A	B	A	A	A	C	B	A	A	B	A	A	B	A	A	B	A	B	B	C	B	A	B	A	B	A	A	B	A	B
1140	5B	77609	IWA3211	wsnp_Ex_c29051_38120784	15.6	C	A	A	A	A	B	B	A	B	A	A	B	B	A	A	C	A	A	B	A	B	A	A	B	A	A	B	A	A	B	A	B	C	A	B	A	B	A	B	A	A	B	A	B
1141	5B	62348	IWB62348	RAC875_rep_c116173_605	16.7	A	A	A	A	A	B	B	A	B	A	A	B	B	A	A	B	A	A	B	A	B	A	A	B	A	A	B	A	A	B	A	B	B	A	B	A	B	A	B	A	A	B	A	B
1142	5B	10350	IWB10350	BS00068592_51	17.2	C	A	A	A	A	B	B	A	B	A	A	B	B	A	A	B	A	A	B	A	B	A	A	B	A	A	B	A	A	B	A	B	B	A	B	A	B	A	B	A	A	B	A	B
1143	5B	54368	IWB54368	RAC875_c16827_292	18.4	C	A	A	A	A	B	B	A	B	A	A	B	B	A	A	B	A	A	B	C	B	A	A	B	A	A	B	A	A	B	A	B	B	A	B	A	B	A	B	A	A	B	A	B
1144	5B	51376	IWB51376	Ra_c19837_1031	19.2	C	A	A	A	A	B	B	A	B	B	A	B	B	A	A	B	A	A	B	C	B	A	A	B	A	A	B	A	A	B	A	B	B	A	B	A	B	A	B	A	A	B	B	B
1145	5B	10728	IWB10728	BS00074315_51	19.5	C	A	A	A	A	B	B	A	B	B	A	B	B	A	A	B	A	A	B	A	B	A	A	B	A	A	B	A	A	B	A	B	B	A	B	A	B	A	B	A	A	B	B	B
1146	5B	79407	IWA5494	wsnp_Ex_rep_c68091_66846454	19.8	C	A	A	A	A	B	B	A	B	B	A	B	B	A	A	B	A	A	B	C	B	A	A	B	A	A	B	A	A	B	A	B	B	A	B	A	B	A	B	A	A	B	B	B
1147	5B	76538	IWA1779	wsnp_Ex_c13468_21202450	20.1	A	A	B	A	A	B	B	A	B	B	A	B	B	A	A	B	A	A	B	A	B	A	A	B	A	A	B	A	A	B	A	B	B	A	B	A	B	A	B	A	A	B	B	B
1148	5B	15500	IWB15500	D_contig09110_430	20.7	C	A	B	A	A	B	B	A	B	B	A	B	B	A	A	C	C	A	B	C	B	A	A	B	C	A	B	A	A	B	A	B	C	B	B	A	B	A	B	A	C	B	B	B
1149	5B	35306	IWB35306	IAAV7187	22.5	C	A	B	A	A	B	B	A	B	B	A	B	B	A	A	B	A	A	B	A	B	A	A	B	A	A	B	A	A	B	A	B	C	C	B	A	B	A	B	A	A	B	B	B
1150	5B	12549	IWB12549	BS00110489_51	22.8	C	A	B	A	A	B	B	A	B	B	A	B	B	A	A	B	A	A	B	A	B	A	A	B	A	A	B	A	A	B	A	B	B	A	B	A	B	A	B	A	A	B	B	B
1151	5B	10657	IWB10657	BS00073261_51	23.4	C	A	B	A	A	B	B	A	B	B	A	B	B	A	A	B	A	B	B	C	B	A	A	B	A	A	B	A	A	B	A	B	B	A	B	A	B	A	B	A	A	B	B	B
1152	5B	14580	IWB14580	CAP8_c1968_64	23.6	C	A	B	A	A	B	B	A	B	B	A	B	B	A	A	B	A	B	B	A	B	A	A	B	A	A	B	A	A	B	A	B	B	A	B	A	B	B	B	A	A	B	B	B
1153	5B	24999	IWB24999	Excalibur_c30667_102	24.5	C	A	B	A	A	B	B	A	B	B	A	B	B	A	A	B	A	B	B	C	B	A	A	B	A	A	B	A	A	B	A	B	B	A	B	A	B	B	B	A	A	B	B	B
1154	5B	69519	IWB69519	Tdurum_contig28408_340	24.7	C	A	B	A	A	B	B	A	B	B	A	B	B	A	A	B	A	B	B	A	B	A	A	B	A	A	B	A	A	B	A	B	C	A	B	A	B	B	B	A	A	B	B	B
1155	5B	71914	IWB71914	Tdurum_contig48658_802	25	C	A	B	A	A	B	B	A	B	B	A	B	B	A	A	B	A	B	B	A	B	A	A	A	A	A	B	A	A	B	A	B	C	A	B	A	B	B	B	A	A	B	B	B
1156	5B	25222	IWB25222	Excalibur_c32630_104	27	A	A	B	A	A	A	B	A	B	B	A	B	B	A	A	B	A	B	B	A	B	A	A	A	A	A	B	A	A	B	A	B	C	A	B	A	B	B	B	A	A	B	B	B
1157	5B	44988	IWB44988	Kukri_c40046_237	33.3	A	A	B	A	B	A	B	A	B	B	B	B	B	A	B	B	A	B	B	A	B	A	A	A	A	A	B	A	A	B	A	B	B	B	B	C	A	B	C	A	A	B	B	B
1158	5B	63206	IWB63206	RAC875_rep_c83825_236	33.5	A	A	B	A	B	A	B	A	B	B	B	B	B	A	B	B	A	B	B	C	B	A	A	A	A	A	B	A	A	B	A	B	B	B	B	C	A	B	C	A	A	B	B	B
1159	5B	47848	IWB47848	Kukri_c805_325	34.4	A	A	B	A	B	A	B	A	B	B	B	B	B	A	B	B	A	B	B	A	B	A	A	A	A	A	B	A	A	B	A	B	B	C	B	B	A	B	C	A	A	B	B	A
1160	5B	49648	IWB49648	Kukri_rep_c114331_346	35.2	B	A	B	A	B	A	B	A	B	B	B	B	B	A	B	B	A	B	B	A	B	A	A	A	A	A	B	A	A	B	A	B	B	B	B	C	A	B	C	A	A	B	B	A
1161	5B	38178	IWB38178	Ku_c1083_1314	35.8	B	A	B	A	B	A	B	A	A	B	B	B	B	A	B	B	A	B	B	A	B	A	A	A	A	A	B	A	A	B	A	B	B	B	B	C	A	B	C	A	A	B	B	A
1162	5B	72578	IWB72578	Tdurum_contig57403_311	36.3	B	A	B	A	B	A	B	A	A	B	B	B	B	A	B	B	A	B	B	A	B	A	A	A	A	A	B	A	A	B	A	B	B	B	B	C	A	B	C	A	A	B	B	A
1163	5B	54612	IWB54612	RAC875_c18106_421	36.6	B	A	B	A	B	A	B	A	A	B	B	B	B	A	B	B	A	B	B	C	B	A	A	A	B	A	B	A	A	B	A	B	B	C	B	C	A	B	C	A	A	B	B	A
1164	5B	35031	IWB35031	IAAV547	37.5	B	A	B	A	B	A	B	A	A	B	B	B	B	A	B	B	A	B	B	A	B	A	A	A	B	A	B	A	A	B	A	B	C	C	B	C	A	B	C	A	A	B	B	A
1165	5B	13747	IWB13747	CAP7_c1155_57	41.7	B	A	B	A	B	A	B	A	B	B	B	B	B	A	B	B	A	A	B	A	B	B	A	A	B	A	B	A	A	B	A	B	C	C	B	C	B	B	C	A	A	B	A	A
1166	5B	54653	IWB54653	RAC875_c18335_443	42.5	B	A	B	A	B	A	B	A	B	B	B	B	B	A	B	B	A	A	B	A	B	B	A	A	B	A	B	A	A	B	A	B	C	C	B	C	B	B	C	A	A	B	A	A
1167	5B	63903	IWB63903	RFL_Contig2304_1569	43.1	B	A	B	A	B	A	B	A	B	B	B	B	B	A	B	B	A	A	B	A	B	B	A	A	B	A	B	A	A	B	A	B	C	C	B	C	B	B	C	A	A	B	A	A
1168	5B	982	IWB982	BobWhite_c16987_106	43.4	B	A	B	A	B	A	B	A	B	B	B	B	B	A	B	B	A	A	B	A	B	B	A	A	B	A	B	A	A	B	A	B	B	B	B	C	B	B	C	A	A	B	A	A
1169	5B	69885	IWB69885	Tdurum_contig29771_76	47	B	A	B	A	A	A	B	A	B	B	B	B	B	A	B	B	A	A	B	C	B	B	B	A	B	B	B	A	A	B	A	B	C	B	B	B	B	B	C	A	A	B	A	A
1170	5B	25367	IWB25367	Excalibur_c33675_410	59.1	A	A	B	B	A	B	B	A	B	A	B	B	B	A	B	B	A	A	B	B	B	A	B	A	B	A	B	A	A	B	B	B	A	B	B	B	B	B	A	B	A	A	A	B
1171	5B	80053	IWA6459	wsnp_Ku_c12464_20125626	59.7	A	A	B	B	B	B	B	A	B	A	B	B	B	A	B	B	A	A	B	B	B	A	B	A	B	A	B	A	A	B	B	B	A	B	B	B	B	B	A	B	A	A	A	B
1172	5B	2723	IWB2723	BobWhite_c34759_227	59.9	A	A	B	B	B	B	B	A	B	A	B	B	B	A	B	B	A	A	B	B	B	A	B	A	B	A	B	A	A	B	B	B	C	B	B	B	B	B	A	B	A	A	A	B
1173	5B	72624	IWB72624	Tdurum_contig58669_273	60.8	A	A	B	B	B	B	B	A	B	A	B	B	B	A	B	B	A	A	B	B	B	A	B	A	B	A	B	A	A	B	B	B	C	B	B	B	B	B	A	B	A	A	C	B
1174	5B	10018	IWB10018	BS00067328_51	61.6	A	C	B	B	B	B	B	A	B	A	B	B	B	A	B	B	A	A	B	B	B	A	B	A	B	A	B	A	A	B	B	B	A	B	B	B	B	B	A	B	A	A	A	B
1175	5B	39412	IWB39412	Ku_c4240_216	62.2	A	A	B	B	B	B	B	A	B	A	B	B	B	A	B	B	A	A	B	C	B	A	B	A	B	A	B	A	A	B	B	B	A	B	B	B	B	B	A	B	A	A	A	B
1176	5B	6424	IWB6424	BS00011514_51	62.8	A	A	B	B	B	A	B	A	B	A	B	B	B	A	B	B	A	A	B	B	B	A	B	A	B	A	B	A	A	B	B	B	A	B	B	B	B	C	A	B	A	A	A	B
1177	5B	22029	IWB22029	Excalibur_c12048_1756	63.9	A	A	B	B	B	A	B	A	B	A	B	B	B	A	B	B	B	A	B	B	B	A	B	A	B	A	B	A	A	B	B	B	C	B	B	B	B	B	A	B	A	A	A	B
1178	5B	29442	IWB29442	Excalibur_c9391_1016	64.4	A	A	B	B	B	A	B	A	B	A	B	B	B	A	B	B	B	A	B	C	B	A	B	A	B	A	B	A	A	B	B	B	C	B	B	B	B	B	A	B	A	A	A	B
1179	5B	31717	IWB31717	GENE-0168_7	64.7	A	A	B	B	B	A	B	A	B	A	B	B	B	A	B	B	B	A	B	C	B	A	B	A	B	A	B	A	A	B	B	B	A	B	B	B	B	B	A	B	A	A	A	C
1180	5B	27379	IWB27379	Excalibur_c5329_1335	65.3	A	A	B	B	B	A	B	A	B	A	B	B	B	A	B	B	B	A	B	B	B	A	B	A	B	A	B	A	A	B	B	B	C	B	B	B	B	B	A	B	A	A	A	B
1181	5B	40210	IWB40210	Kukri_c10016_369	66.1	A	A	B	B	B	A	B	A	B	A	B	B	B	A	B	B	B	A	B	B	B	A	B	A	B	A	B	A	A	B	B	B	C	B	B	B	B	B	A	B	A	A	A	B
1182	5B	46235	IWB46235	Kukri_c52257_991	66.7	A	A	B	B	B	A	B	A	B	A	B	B	B	A	B	B	B	A	B	B	B	A	B	A	B	A	B	A	A	B	B	B	C	B	B	B	B	B	A	B	A	A	A	B
1183	5B	230	IWB230	BobWhite_c11495_120	66.9	A	A	B	B	B	A	B	A	B	A	B	B	B	A	B	B	B	A	B	B	B	A	B	A	B	A	B	A	A	B	B	B	C	B	B	B	B	B	A	B	A	A	A	B
1184	5B	67069	IWB67069	Tdurum_contig11411_100	67.5	A	A	B	B	B	A	B	A	B	A	B	B	B	A	B	B	B	A	B	C	B	A	B	A	B	A	B	A	A	B	B	B	A	C	B	B	B	B	A	B	A	A	A	B
1185	5B	65348	IWB65348	TA001138-0446	68.4	A	A	B	B	B	A	B	A	B	A	B	B	B	A	B	B	B	A	B	B	B	A	B	A	B	A	B	A	A	B	B	B	C	B	B	B	B	B	A	B	A	A	A	B
1186	5B	6003	IWB6003	BS00005860_51	69.2	A	A	B	B	B	A	B	A	B	A	B	B	B	A	B	B	B	A	B	B	B	A	B	A	B	A	B	A	A	B	B	B	C	B	B	B	B	B	A	B	A	A	B	B
1187	5B	36364	IWB36364	IACX9238	69.5	A	A	B	B	B	A	B	A	B	A	B	B	B	A	B	B	B	A	B	C	B	A	B	A	B	A	B	A	A	B	B	B	A	C	B	B	B	B	A	B	A	A	B	B
1188	5B	69502	IWB69502	Tdurum_contig28353_1110	71.8	A	A	B	B	A	A	B	A	B	A	B	B	B	A	B	B	B	A	B	C	B	A	B	A	B	A	B	A	A	B	B	B	A	C	B	B	B	B	A	B	A	A	B	B
1189	5B	54309	IWB54309	RAC875_c16536_80	73.2	A	A	B	B	A	A	B	A	B	A	B	B	B	A	B	B	B	A	B	B	A	A	B	A	B	A	B	A	A	B	B	B	C	B	B	A	B	B	A	A	A	A	B	B
1190	5B	7213	IWB7213	BS00022689_51	73.5	A	A	B	B	A	A	B	A	B	A	B	B	B	A	B	B	B	A	B	B	A	A	B	A	B	A	B	A	A	B	B	B	A	B	B	A	B	B	A	A	A	A	B	B
1191	5B	7405	IWB7405	BS00023064_51	74.1	A	A	B	B	A	A	B	A	B	A	B	B	B	A	B	B	B	A	B	C	A	A	B	A	B	A	B	A	A	B	B	B	A	B	B	A	B	B	A	A	A	A	B	B
1192	5B	73174	IWB73174	Tdurum_contig70554_1004	75.2	A	A	B	B	A	A	B	A	B	A	B	B	B	A	B	B	B	A	B	C	A	A	B	A	B	A	B	A	A	B	A	B	A	C	B	A	A	B	A	A	A	A	B	B
1193	5B	68186	IWB68186	Tdurum_contig14326_597	75.8	A	A	B	B	A	A	B	A	B	A	B	B	B	A	B	B	B	A	B	B	A	A	B	A	B	A	B	A	A	B	A	B	C	B	B	A	A	B	A	A	A	A	B	B
1194	5B	21051	IWB21051	Ex_c6571_224	76.1	A	A	B	B	A	A	B	A	B	A	B	B	B	A	B	B	B	A	B	B	A	A	B	A	B	A	B	A	A	B	A	B	C	B	B	A	A	B	A	A	A	A	B	B
1195	5B	72182	IWB72182	Tdurum_contig51422_127	78.3	A	A	B	B	A	A	A	A	B	A	B	B	B	A	B	B	B	A	B	B	A	A	B	A	B	A	B	A	A	B	A	B	A	B	B	A	A	B	A	A	A	A	B	B
1196	5B	69164	IWB69164	Tdurum_contig25692_435	78.6	A	A	B	B	A	A	A	A	B	A	B	B	B	A	B	B	B	A	B	B	A	A	B	A	B	A	B	A	A	B	A	B	C	B	B	A	A	B	A	A	A	A	B	B
1197	5B	6823	IWB6823	BS00021960_51	79.4	A	A	B	B	A	A	A	A	B	A	B	B	B	A	B	B	A	A	B	B	A	A	B	A	B	A	B	A	A	B	A	C	A	B	B	A	A	B	A	A	A	A	B	B
1198	5B	70781	IWB70781	Tdurum_contig42069_208	81.7	A	A	B	B	A	B	A	A	B	A	B	B	B	A	B	B	A	A	B	A	A	A	B	A	B	A	A	A	A	B	A	B	C	B	B	A	A	B	A	A	B	A	B	B
1199	5B	71831	IWB71831	Tdurum_contig47627_442	84	A	A	A	B	A	B	A	A	B	A	B	B	B	A	B	B	A	A	B	A	B	A	B	A	B	A	A	A	A	B	B	B	A	B	B	A	A	B	B	A	B	B	B	B
1200	5B	47014	IWB47014	Kukri_c62719_188	84.3	A	A	A	B	A	B	A	A	B	A	B	B	B	A	B	B	A	A	B	A	B	A	B	A	B	A	A	A	A	B	B	B	A	B	B	A	A	B	B	A	B	B	B	B
1201	5B	35993	IWB35993	IACX546	84.6	A	A	A	B	A	B	A	A	B	A	B	B	B	A	B	B	A	A	B	C	B	A	B	A	B	A	A	A	A	B	B	B	C	B	B	A	A	B	C	A	B	B	B	B
1202	5B	72680	IWB72680	Tdurum_contig59729_196	84.8	A	A	A	B	A	B	A	A	B	A	B	B	B	A	B	B	A	A	B	A	B	A	B	A	B	A	A	A	A	B	B	B	A	C	B	A	A	B	C	A	B	B	B	B
1203	5B	12511	IWB12511	BS00110293_51	85.1	A	A	A	B	A	B	A	A	B	A	B	B	B	A	B	B	A	A	B	A	B	A	B	A	B	A	A	A	A	B	B	B	A	B	B	A	A	B	C	A	B	B	B	B
1204	5B	3521	IWB3521	BobWhite_c46573_367	85.4	A	A	A	B	A	B	A	A	B	A	B	B	B	A	B	B	A	A	B	A	B	A	B	C	B	A	A	A	A	B	B	B	A	B	B	A	A	B	B	A	B	B	B	B
1205	5B	2125	IWB2125	BobWhite_c2767_72	86.8	A	A	A	B	A	B	A	A	B	A	B	B	B	A	B	B	A	A	B	A	B	A	B	B	B	A	A	A	A	B	B	B	C	B	B	B	A	B	C	A	B	B	B	B
1206	5B	6532	IWB6532	BS00012140_51	92.2	A	A	A	B	A	B	A	A	B	A	B	B	B	A	B	B	A	A	B	C	B	A	B	B	A	A	A	A	A	B	B	B	C	B	B	A	A	B	C	A	A	B	B	B
1207	5B	56345	IWB56345	RAC875_c29488_56	92.8	A	A	A	B	A	B	A	A	B	A	B	B	B	A	B	B	A	A	B	C	B	A	B	B	A	A	A	A	A	B	B	B	C	B	B	A	A	B	C	A	A	B	B	B
1208	5B	12043	IWB12043	BS00098520_51	93.3	A	A	A	B	A	B	A	A	B	A	B	B	B	A	B	B	A	A	B	C	B	A	B	B	A	A	A	A	A	B	B	B	C	B	B	A	A	B	C	A	A	B	B	B
1209	5B	76360	IWA1564	wsnp_Ex_c11951_19164786	93.6	A	A	A	B	A	B	A	A	B	A	B	B	B	A	B	B	A	A	B	A	B	A	B	B	A	A	A	A	A	B	B	B	C	B	B	A	A	B	C	A	A	B	B	B
1210	5B	73548	IWB73548	Tdurum_contig8210_317	93.9	A	A	A	B	A	B	A	A	B	A	B	B	B	A	B	B	A	A	B	C	B	A	B	B	A	A	A	A	A	B	B	B	C	B	B	A	A	B	C	A	A	B	B	B
1211	5B	64466	IWB64466	RFL_Contig372_339	94.2	A	A	A	B	A	B	A	A	B	A	B	B	B	A	B	B	A	A	B	C	B	A	B	B	A	A	A	A	A	B	B	B	C	B	B	A	A	B	C	A	A	B	B	B
1212	5B	11392	IWB11392	BS00084907_51	94.5	A	A	A	B	A	B	A	A	B	A	B	B	B	A	B	B	A	A	B	C	B	A	B	B	A	A	A	A	A	B	B	B	C	B	B	A	A	B	C	A	A	B	B	B
1213	5B	7556	IWB7556	BS00024814_51	94.7	A	A	A	B	A	B	A	A	B	A	B	B	B	A	B	B	A	A	B	C	B	A	B	B	A	A	A	A	A	B	B	B	A	B	B	C	A	B	C	A	A	B	B	B
1214	5B	48112	IWB48112	Kukri_c87328_116	95	A	A	A	B	A	B	A	A	B	A	B	B	B	A	B	B	A	A	B	A	B	A	B	B	A	A	A	A	A	B	B	B	A	B	B	A	A	B	C	A	A	B	B	B
1215	5B	72617	IWB72617	Tdurum_contig58293_582	95.6	A	A	A	B	A	B	A	A	B	A	B	B	B	A	B	B	A	A	B	A	B	A	B	B	A	A	A	A	A	B	B	C	A	B	B	A	A	B	C	A	A	B	B	B
1216	5B	26458	IWB26458	Excalibur_c43534_878	96.1	A	A	A	B	A	B	A	A	B	A	B	B	B	A	B	B	A	A	B	A	B	A	B	B	A	A	A	A	A	B	B	B	A	B	B	A	A	B	B	A	A	B	B	B
1217	5B	29437	IWB29437	Excalibur_c9370_944	97.6	A	A	A	B	A	B	A	A	B	A	B	B	B	A	B	B	A	A	B	C	B	A	B	B	A	A	A	A	A	B	B	C	C	B	B	B	A	B	C	A	A	B	B	B
1218	5B	764	IWB764	BobWhite_c15241_604	103	A	A	A	B	A	B	B	A	A	A	B	A	B	A	B	B	A	A	B	C	B	A	B	B	A	A	A	A	A	A	B	C	A	B	B	B	A	B	C	A	A	B	A	B
1219	5B	3327	IWB3327	BobWhite_c43731_313	103.3	A	A	A	B	A	B	B	A	A	A	B	A	B	A	B	B	A	A	B	C	B	A	B	B	A	A	A	A	A	A	B	C	A	B	B	B	A	B	C	A	A	B	A	B
1220	5B	9652	IWB9652	BS00065864_51	104.7	A	A	A	B	A	B	B	A	A	A	B	A	B	A	B	B	A	A	B	B	B	A	B	B	A	A	A	A	A	A	B	C	C	B	B	B	A	B	C	A	A	B	A	B
1221	5B	26719	IWB26719	Excalibur_c46000_203	105	A	A	A	B	A	B	B	A	A	A	B	A	B	A	B	B	A	A	B	B	B	A	B	B	A	A	A	A	A	A	B	C	A	B	B	B	A	B	C	A	A	B	A	B
1222	5B	27497	IWB27497	Excalibur_c54637_123	109.2	A	A	A	A	A	B	B	A	A	A	B	A	B	A	B	B	A	A	B	A	B	A	B	B	A	A	A	A	A	A	B	B	A	B	B	C	A	B	C	A	A	B	A	B
1223	5B	40757	IWB40757	Kukri_c1214_544	109.8	A	A	A	A	A	B	B	A	A	A	B	A	B	A	B	B	A	A	B	A	B	A	B	B	A	A	A	A	A	A	B	B	A	B	B	B	A	B	A	A	A	B	A	B
1224	5B	4387	IWB4387	BobWhite_c7818_278	110.3	A	A	A	A	A	B	B	A	A	A	B	A	B	A	B	B	A	A	B	C	B	A	B	B	A	A	A	A	A	A	B	B	B	B	B	B	A	B	A	A	A	B	A	B
1225	5B	24417	IWB24417	Excalibur_c2618_1412	110.6	A	A	A	A	A	B	B	A	A	A	B	A	B	A	B	B	A	A	B	A	B	A	B	B	A	A	A	A	B	A	B	B	B	B	B	B	A	B	A	A	A	B	A	B
1226	5B	28628	IWB28628	Excalibur_c72450_483	111.7	A	A	A	A	A	B	B	A	B	A	B	A	B	A	B	B	A	C	B	C	B	A	B	B	A	A	A	A	B	A	B	B	B	B	B	B	A	B	A	A	A	B	A	B
1227	5B	29462	IWB29462	Excalibur_c94390_60	115.6	A	A	A	A	A	B	B	A	B	A	B	A	B	A	B	B	A	A	B	C	B	A	B	B	A	B	A	A	B	A	B	B	B	B	B	B	A	C	A	A	A	B	A	B
1228	5B	66258	IWB66258	Tdurum_contig10100_659	116.2	A	C	A	A	B	B	B	A	B	A	B	A	B	A	C	B	A	A	B	A	B	A	B	B	A	B	C	A	B	A	B	B	B	B	B	B	A	B	A	A	A	B	A	B
1229	5B	64287	IWB64287	RFL_Contig3285_1009	116.4	A	A	A	A	B	B	B	B	B	A	B	A	B	A	A	B	A	A	B	C	B	A	B	B	A	B	A	A	B	A	B	B	B	B	B	B	A	B	A	A	A	B	A	B
1230	5B	29686	IWB29686	Excalibur_rep_c100012_1145	117.6	A	A	A	A	B	B	B	B	B	B	B	A	B	A	A	B	A	A	B	A	B	A	B	B	A	B	A	A	B	A	B	B	B	B	B	B	A	B	A	A	B	B	A	B
1231	5B	11015	IWB11015	BS00078515_51	118.1	A	A	A	A	B	B	B	B	B	B	B	A	B	A	A	B	A	A	B	C	B	A	B	B	A	B	A	A	B	A	B	B	B	B	B	B	A	B	A	A	B	B	A	B
1232	5B	28598	IWB28598	Excalibur_c71602_591	130.3	C	A	B	A	B	B	A	B	B	B	B	A	A	A	A	B	A	A	B	A	A	B	B	B	A	B	A	A	B	A	B	A	C	B	B	B	A	A	A	A	B	B	A	B
1233	5B	80146	IWA6578	wsnp_Ku_c16116_24914991	130.6	C	A	B	A	B	B	A	B	B	B	B	A	A	A	A	B	A	A	B	A	A	B	B	B	A	B	A	A	B	A	B	A	B	B	B	B	A	A	A	A	B	B	A	B
1234	5D	5730	IWB5730	BobWhite_s67669_117	0	A	A	B	B	B	C	A	A	A	B	A	A	A	A	B	B	A	A	B	B	B	B	B	B	B	A	A	B	A	C	A	A	A	B	B	B	B	B	B	A	A	A	A	A
1235	5D	15785	IWB15785	D_contig15408_376	0.9	A	A	B	B	B	A	A	A	A	B	A	A	A	A	B	B	A	A	B	B	B	B	B	B	B	A	A	B	A	C	A	A	A	B	B	B	B	B	B	A	A	A	A	A
1236	5D	6100	IWB6100	BS00009699_51	3.8	A	A	B	B	B	A	A	A	A	B	A	A	A	A	B	B	A	A	A	B	B	B	B	B	A	A	A	A	A	C	A	A	A	B	B	B	B	B	B	A	A	A	A	A
1237	5D	15297	IWB15297	D_contig04203_490	4.4	A	A	B	B	B	A	A	A	A	B	A	A	A	A	B	B	A	A	A	B	B	B	B	B	A	A	A	A	A	C	A	A	A	B	B	B	B	B	B	A	A	A	A	A
1238	5D	16748	IWB16748	D_contig38148_212	5.5	A	A	B	B	B	A	A	A	A	B	A	A	B	A	B	B	A	A	A	B	B	B	B	B	A	A	A	A	A	C	A	A	A	B	B	B	B	B	B	A	A	A	A	A
1239	5D	81512	IWA8499	wsnp_RFL_Contig3661_3867818	5.8	A	A	B	B	B	A	A	A	A	B	A	A	B	A	B	B	A	A	A	B	B	B	B	B	A	A	A	A	A	C	A	A	C	B	B	B	B	B	B	A	A	A	A	A
1240	5D	18626	IWB18626	D_GBUVHFX01D3ZGK_243	6.1	A	A	B	B	B	A	A	A	A	B	A	A	B	A	B	B	A	A	A	B	B	B	B	B	A	A	A	A	A	C	A	A	A	B	B	B	B	B	B	A	A	A	A	A
1241	5D	57782	IWB57782	RAC875_c41830_186	8.1	A	B	B	B	B	A	A	A	A	B	A	A	B	A	B	B	A	A	A	B	B	B	B	B	A	A	A	A	A	C	B	A	B	B	B	B	B	B	B	A	A	A	A	A
1242	5D	35558	IWB35558	IAAV8896	8.6	A	B	B	B	B	A	A	A	A	B	B	A	B	A	B	B	A	A	A	B	B	B	B	B	A	A	A	A	A	C	B	A	B	B	B	B	B	B	B	A	A	A	A	A
1243	5D	52486	IWB52486	Ra_c6993_1750	10.7	A	B	B	B	B	A	A	A	A	B	B	A	C	A	B	B	A	A	A	B	B	B	B	B	B	A	A	A	B	C	B	A	B	B	B	B	B	B	B	A	A	A	A	A
1244	5D	16805	IWB16805	D_contig47905_414	11	A	B	B	B	B	A	A	A	A	B	B	A	A	A	B	B	A	A	A	B	B	B	B	B	B	A	A	C	B	C	B	A	B	B	B	B	B	B	B	A	A	A	A	A
1245	5D	25818	IWB25818	Excalibur_c37393_75	13.1	B	B	B	B	B	A	A	A	A	B	B	B	A	A	B	B	A	A	A	B	B	B	B	B	B	A	A	B	B	A	B	A	B	B	B	B	B	B	B	A	A	A	A	A
1246	5D	16123	IWB16123	D_contig23016_198	13.6	B	B	B	B	B	A	A	A	A	B	B	B	A	A	B	B	A	A	A	B	B	B	B	B	B	A	A	B	B	A	B	A	B	B	B	B	B	B	B	A	A	A	A	A
1247	5D	6703	IWB6703	BS00021670_51	13.9	B	B	B	B	B	A	A	A	A	B	B	B	A	A	B	B	A	A	A	B	B	B	B	B	B	A	A	B	B	A	B	A	B	B	B	B	B	B	B	A	A	A	A	A
1248	5D	80654	IWA7254	wsnp_Ku_c6950_12032896	14.5	B	B	B	B	B	A	A	A	A	B	B	B	A	A	B	B	A	A	A	B	B	B	B	B	B	A	A	B	B	A	B	A	B	B	B	B	A	B	B	A	A	A	A	A
1249	5D	18848	IWB18848	D_GCE8AKX01EN4D2_337	15	B	B	B	B	B	A	A	A	A	B	A	B	A	A	B	B	A	A	A	B	B	B	B	B	B	A	A	B	B	A	C	A	B	B	B	B	A	B	B	A	A	A	A	A
1250	5D	16856	IWB16856	D_contig52724_224	15.3	B	B	B	B	B	A	A	A	A	B	A	A	A	A	B	B	A	A	A	B	B	B	B	B	B	A	A	B	B	A	C	A	B	B	B	B	A	B	B	A	A	A	A	A
1251	5D	58749	IWB58749	RAC875_c51455_182	15.8	B	B	A	B	B	A	A	A	A	B	A	A	A	A	B	B	A	A	A	B	B	B	B	B	B	A	A	B	B	A	C	A	B	B	B	B	A	B	B	A	A	A	A	A
1252	5D	65574	IWB65574	TA002565-0478	16.1	B	B	A	B	B	A	A	A	A	B	A	A	A	A	B	B	A	A	A	B	B	B	B	B	B	A	A	B	B	A	C	A	B	B	B	B	A	B	B	A	A	A	A	A
1253	5D	62739	IWB62739	RAC875_rep_c70941_685	16.9	B	B	A	B	B	A	A	A	A	B	A	A	A	A	B	B	A	A	A	B	B	B	B	B	B	A	A	B	B	A	C	A	B	B	B	B	A	B	B	A	A	A	A	A
1254	5D	58605	IWB58605	RAC875_c50011_126	17.2	B	B	A	B	B	A	A	A	A	B	A	A	A	A	B	B	A	A	A	C	B	B	B	B	B	A	A	B	B	A	C	A	B	C	B	B	A	B	B	A	A	A	A	A
1255	5D	58111	IWB58111	RAC875_c4504_51	17.5	B	B	A	B	B	A	A	A	A	B	A	A	A	A	B	B	A	A	A	B	B	B	B	B	B	A	A	B	B	A	C	A	B	B	B	B	A	B	B	A	A	A	A	A
1256	5D	40957	IWB40957	Kukri_c13045_302	18.6	B	B	A	B	B	A	B	A	A	B	A	A	A	A	B	B	A	A	A	B	B	B	B	B	B	A	A	B	B	A	C	A	B	B	B	B	A	B	B	A	A	A	A	A
1257	5D	63711	IWB63711	RFL_Contig1702_460	19.8	B	B	B	B	B	A	B	A	A	B	A	A	A	A	B	B	A	A	B	B	B	B	B	B	B	A	A	B	B	A	C	A	B	B	B	B	A	B	B	A	A	A	A	A
1258	5D	50247	IWB50247	Kukri_rep_c73094_348	20.6	B	B	B	B	B	A	B	A	A	B	A	A	A	A	B	B	A	A	B	B	B	B	B	B	B	A	A	A	B	A	C	A	C	B	B	B	A	B	B	A	A	A	A	A
1259	5D	30040	IWB30040	Excalibur_rep_c104569_101	20.9	B	B	B	B	B	A	B	A	A	B	A	A	A	A	B	B	A	A	B	B	B	B	B	B	B	A	A	A	B	A	C	A	A	B	B	B	A	B	B	A	A	A	A	A
1260	5D	53304	IWB53304	RAC875_c11298_245	21.4	B	B	B	B	B	A	B	A	A	B	A	A	A	A	B	B	A	A	B	B	B	B	B	B	B	A	A	A	B	A	C	A	C	B	B	B	A	B	B	A	A	A	A	A
1261	5D	63812	IWB63812	RFL_Contig2033_482	22.6	B	B	B	B	B	A	B	A	A	B	A	A	A	A	B	B	A	A	B	B	B	B	B	B	B	A	A	A	B	A	C	A	A	B	B	B	A	B	B	B	A	A	A	A
1262	5D	22092	IWB22092	Excalibur_c12440_1292	22.9	B	B	B	B	B	A	B	A	A	B	A	A	A	A	B	B	A	A	B	B	B	B	B	B	B	A	A	A	B	A	C	A	C	B	B	B	C	B	B	B	A	A	A	A
1263	5D	36656	IWB36656	Jagger_c5801_167	23.4	B	B	B	B	B	A	B	A	A	B	A	A	A	A	B	B	A	A	B	B	B	B	B	B	B	A	A	A	B	A	B	A	C	C	B	B	A	B	B	B	A	A	A	A
1264	5D	62829	IWB62829	RAC875_rep_c72023_267	27.7	A	B	B	B	A	A	B	A	A	B	A	A	A	A	B	B	A	A	B	B	B	B	B	B	B	A	A	A	B	A	B	B	A	A	B	B	A	B	B	B	A	A	B	A
1265	5D	35889	IWB35889	IACX2960	28.8	A	B	B	A	A	A	B	A	B	B	A	A	A	A	B	B	A	A	B	B	B	B	B	C	B	A	A	A	B	A	B	B	A	A	B	B	A	B	B	B	A	A	B	A
1266	5D	17898	IWB17898	D_GA8KES402HYT7F_263	30.8	A	B	B	A	A	A	B	B	B	B	A	A	A	A	B	B	A	A	B	B	B	B	B	B	B	A	A	A	A	A	B	B	C	C	B	A	A	B	B	B	A	A	B	A
1267	5D	18994	IWB18994	D_GDEEGVY01CEIGE_161	32	A	B	B	B	A	A	B	B	B	B	A	A	A	B	B	B	A	A	B	B	B	B	B	C	B	A	A	A	A	A	B	B	A	C	B	A	A	B	B	B	A	A	B	A
1268	5D	25542	IWB25542	Excalibur_c35047_271	35.2	A	B	B	B	A	A	B	B	B	B	A	A	A	B	B	B	A	A	B	B	B	B	B	B	B	B	A	A	A	A	B	B	A	C	A	C	A	B	B	B	A	C	B	A
1269	5D	13843	IWB13843	CAP7_c1669_191	37.6	A	B	B	B	A	A	B	B	B	B	A	A	A	B	C	B	A	A	B	B	B	B	A	B	B	B	A	A	A	A	B	B	A	C	A	C	A	B	B	B	B	C	B	A
1270	5D	18463	IWB18463	D_GBF1XID02ILGAO_466	45.7	A	B	B	B	A	A	B	B	B	B	A	A	A	B	A	A	A	A	B	B	B	B	A	B	B	A	A	A	A	A	B	B	A	C	A	C	B	B	B	B	C	A	B	A
1271	5D	29114	IWB29114	Excalibur_c8478_273	46.5	A	B	B	B	A	A	B	B	B	B	A	A	A	B	A	A	A	A	B	B	B	B	A	B	B	A	A	A	A	A	B	B	C	A	A	C	B	B	A	B	C	A	B	A
1272	5D	1781	IWB1781	BobWhite_c23972_967	49.8	A	B	B	B	A	A	B	B	B	B	A	A	A	B	A	A	A	A	B	B	B	B	A	B	B	A	A	A	A	A	B	B	A	C	A	C	B	C	A	B	B	A	B	A
1273	5D	18281	IWB18281	D_GBB4FNX02HAJIG_61	50.1	A	B	B	B	A	A	B	B	B	B	A	A	A	B	A	A	A	A	B	C	B	B	A	B	B	A	A	A	A	A	B	B	C	C	A	C	B	B	A	B	B	A	B	A
1274	5D	18140	IWB18140	D_GB5Y7FA02JG2TQ_264	51.3	A	B	B	B	B	A	B	B	B	B	A	A	A	B	A	A	A	A	A	B	B	B	A	B	B	A	A	A	A	A	B	B	A	A	A	C	B	B	A	B	B	A	B	A
1275	5D	11972	IWB11972	BS00096756_51	51.6	A	B	B	B	B	A	B	B	B	B	A	A	A	B	A	A	A	A	A	B	B	B	A	B	B	A	A	A	A	A	B	B	A	C	A	A	B	B	A	B	B	A	B	A
1276	5D	15782	IWB15782	D_contig15384_170	52.7	A	B	B	B	B	A	B	B	B	B	A	A	A	B	A	A	A	A	A	C	B	B	A	B	B	A	A	A	A	A	B	B	A	A	B	C	B	B	A	B	B	B	B	A
1277	5D	31214	IWB31214	Excalibur_rep_c73156_287	59.2	A	B	A	B	B	A	B	B	B	B	A	A	A	B	A	B	A	A	A	A	B	B	A	B	A	A	A	A	A	A	B	B	A	C	B	A	B	A	A	B	B	B	B	A
1278	5D	6794	IWB6794	BS00021911_51	61.2	A	B	A	B	B	A	B	B	B	B	A	A	A	B	A	C	A	A	A	A	B	B	A	B	A	A	A	A	A	A	B	B	A	A	B	A	B	C	A	B	B	B	B	B
1279	5D	50039	IWB50039	Kukri_rep_c70578_346	65.1	A	B	A	B	B	A	B	A	A	B	A	A	B	B	A	A	A	A	A	A	B	B	A	B	A	A	A	A	A	A	B	B	A	C	B	A	B	C	A	B	B	B	B	B
1280	5D	19279	IWB19279	D_GDS7LZN01AWY50_206	69	A	B	A	B	B	A	B	A	A	B	A	A	B	B	A	A	A	B	A	A	B	B	A	B	A	A	A	A	A	A	B	B	A	A	B	A	B	C	A	B	B	B	B	B
1281	5D	18134	IWB18134	D_GB5Y7FA02IZ73U_152	72.3	A	B	A	B	B	A	B	A	A	B	A	A	B	B	A	A	A	A	A	C	B	B	A	B	A	A	B	B	A	A	A	B	B	C	B	A	B	C	A	B	B	B	A	B
1282	5D	17912	IWB17912	D_GA8KES402IPEKV_90	75.6	A	B	A	B	B	B	B	A	A	B	A	A	B	B	A	A	A	A	A	A	B	B	A	B	B	A	B	B	A	A	A	B	B	A	B	A	B	B	A	B	B	B	A	B
1283	5D	19332	IWB19332	D_GDS7LZN01DW87V_234	75.9	A	B	A	B	B	B	B	A	A	B	A	A	B	B	A	A	A	A	A	A	B	B	A	B	B	A	B	B	A	A	A	B	B	A	B	A	B	B	A	B	B	B	A	B
1284	5D	17676	IWB17676	D_F5XZDLF02IP5IR_228	76.4	A	B	A	B	B	A	B	A	A	B	A	A	B	B	A	A	A	A	A	C	B	B	A	B	B	A	B	B	A	A	A	B	B	C	B	A	B	B	A	B	B	B	A	B
1285	5D	18497	IWB18497	D_GBQ4KXB01BMEK8_423	77.6	A	B	A	B	B	A	C	A	A	A	A	A	B	B	A	A	A	A	A	A	B	B	A	B	B	A	B	B	A	A	A	B	B	C	B	A	B	B	A	B	B	B	A	B
1286	5D	28790	IWB28790	Excalibur_c76347_77	78.2	A	B	A	B	B	A	C	A	A	A	A	A	B	B	A	A	A	A	A	C	B	B	A	B	B	A	B	B	A	A	A	B	B	A	B	A	B	B	A	B	B	B	A	B
1287	5D	67148	IWB67148	Tdurum_contig11553_534	78.5	A	B	A	B	B	A	C	A	A	A	A	A	B	B	A	A	A	A	A	C	B	B	A	B	B	A	B	B	A	A	A	B	C	C	B	A	B	B	A	B	B	B	A	B
1288	5D	39731	IWB39731	Ku_c6176_938	79	A	B	A	B	B	A	C	A	A	A	A	A	B	B	A	A	A	B	A	A	B	B	A	B	B	A	B	B	A	A	A	B	B	C	B	A	B	B	A	B	B	B	A	B
1289	5D	36749	IWB36749	Jagger_c754_272	82.3	A	B	A	B	B	A	C	A	A	A	A	A	B	B	A	A	B	B	A	A	B	B	A	B	B	A	B	B	A	A	A	B	B	A	B	A	B	B	A	B	B	B	A	B
1290	5D	16900	IWB16900	D_contig56923_144	83.5	A	B	A	B	B	A	C	A	A	A	A	B	B	B	A	A	B	B	A	A	B	B	A	B	B	A	B	B	A	A	A	B	B	A	B	A	B	B	A	B	B	B	A	B
1291	5D	31501	IWB31501	Excalibur_s107041_192	89.4	A	B	A	B	B	A	C	A	A	A	A	B	B	B	A	A	B	A	A	A	B	B	A	B	B	A	B	B	C	A	A	B	B	C	B	A	B	B	B	B	A	B	A	C
1292	5D	2089	IWB2089	BobWhite_c2730_245	93.2	A	B	A	B	B	A	A	A	A	A	B	B	B	B	A	A	B	A	A	C	B	B	A	B	B	A	B	A	A	A	A	B	B	A	B	B	B	B	B	B	A	B	A	B
1293	5D	53151	IWB53151	RAC875_c107024_454	95.2	A	B	A	B	B	A	A	A	A	A	B	B	B	B	A	A	A	B	A	C	B	B	A	B	B	A	B	A	A	A	A	B	B	A	B	B	B	B	B	B	A	B	A	B
1294	5D	37349	IWB37349	JD_c330_1246	96	A	B	A	B	B	A	A	A	A	A	B	B	B	B	A	A	A	B	A	C	B	B	A	B	B	A	B	A	A	A	A	B	B	B	B	B	B	B	B	B	A	B	A	B
1295	5D	65355	IWB65355	TA001166-0603	96.9	A	B	A	B	B	A	A	A	A	A	B	B	B	B	A	A	A	B	A	C	B	B	A	B	B	A	B	A	A	A	A	B	B	B	B	B	B	B	B	B	A	B	A	B
1296	5D	15855	IWB15855	D_contig17143_54	100.7	A	B	A	B	B	A	A	A	B	A	B	B	B	B	A	A	B	B	A	C	B	B	B	B	B	A	A	A	A	A	A	B	B	B	B	B	B	B	B	B	A	B	A	B
1297	5D	22975	IWB22975	Excalibur_c17489_843	104.2	A	B	A	A	B	A	A	A	B	A	B	B	B	B	A	A	B	B	A	C	A	A	B	B	B	A	B	A	A	B	A	B	B	B	B	B	B	B	B	B	A	B	A	B
1298	5D	29990	IWB29990	Excalibur_rep_c103850_753	106.8	A	B	A	A	B	B	A	A	B	A	B	B	B	B	A	A	B	B	A	C	A	A	B	B	A	A	B	A	A	B	A	B	B	B	B	B	B	B	B	B	A	B	A	B
1299	5D	49837	IWB49837	Kukri_rep_c69008_811	107.4	A	B	A	A	B	B	A	A	B	A	B	B	B	B	A	A	B	B	A	C	A	A	B	B	A	A	B	A	A	B	A	B	B	B	B	B	B	B	B	B	A	B	A	B
1300	5D	80599	IWA7177	wsnp_Ku_c55961_59662821	109.4	A	B	A	A	B	B	A	A	B	A	B	B	B	B	A	A	B	B	A	C	A	A	B	B	A	A	B	A	A	B	A	B	B	B	B	B	B	B	B	A	A	B	A	B
1301	5D	17208	IWB17208	D_contig78113_349	110	A	B	A	A	B	B	A	A	B	A	B	B	B	B	A	A	B	B	A	C	A	A	B	B	A	A	B	A	A	B	A	B	C	B	B	C	B	B	B	A	A	B	A	B
1302	5D	80016	IWA6409	wsnp_Ku_c10877_17896883	110.8	A	B	A	A	B	B	A	A	B	A	B	B	B	B	A	A	B	B	A	C	A	A	B	B	A	A	B	A	A	B	A	B	A	B	B	C	B	B	B	A	A	B	A	B
1303	5D	37841	IWB37841	JD_c825_1450	111.1	A	B	A	A	B	B	A	A	B	A	B	B	B	B	A	A	B	B	A	A	A	A	B	B	A	A	B	A	A	B	A	B	A	B	B	B	B	B	B	A	A	B	A	B
1304	5D	14252	IWB14252	CAP7_c756_531	111.4	A	B	A	A	B	B	A	A	B	A	B	B	B	B	C	A	B	B	A	A	A	A	B	B	A	A	B	A	A	B	A	B	A	B	B	B	B	B	B	A	A	B	A	C
1305	5D	6593	IWB6593	BS00013935_51	111.9	A	B	A	A	B	B	A	A	B	A	B	B	B	B	A	A	B	B	A	A	A	A	B	B	A	A	B	A	A	B	A	B	A	B	B	B	B	B	B	A	A	B	A	C
1306	5D	56960	IWB56960	RAC875_c34515_86	112.2	A	B	A	A	B	B	A	A	B	A	B	B	B	B	A	A	B	B	A	A	A	A	B	B	A	A	B	A	A	B	A	B	A	B	B	B	B	B	B	A	A	B	A	B
1307	5D	9561	IWB9561	BS00065473_51	117.8	A	B	A	A	B	B	A	A	B	A	B	A	A	B	A	A	B	B	A	A	A	A	B	B	A	A	B	A	A	B	A	B	A	B	B	B	B	B	B	A	A	B	A	A
1308	5D	15705	IWB15705	D_contig13855_208	123.3	A	B	A	A	B	B	A	A	A	A	B	A	A	B	A	A	B	B	A	A	A	A	B	B	A	A	B	A	A	B	A	B	A	B	A	B	A	B	B	A	A	B	B	A
1309	5D	26811	IWB26811	Excalibur_c46789_702	123.9	A	B	A	A	B	B	A	A	A	A	B	A	A	B	A	A	B	B	A	A	A	A	B	B	A	A	B	A	A	B	A	B	A	B	A	C	A	B	B	A	A	B	B	A
1310	6A	2381	IWB2381	BobWhite_c30632_331	0	A	A	A	A	A	A	B	A	A	B	A	A	A	A	B	A	A	B	B	B	A	C	A	A	A	A	B	B	B	B	B	A	A	B	A	A	A	B	B	B	B	A	A	B
1311	6A	9013	IWB9013	BS00063170_51	0.6	A	A	A	A	A	C	B	A	A	B	A	A	A	A	B	A	A	B	B	B	A	A	A	A	C	B	B	B	B	B	B	A	A	B	A	A	A	B	B	B	B	A	A	B
1312	6A	47513	IWB47513	Kukri_c7146_870	0.8	A	A	A	A	A	A	B	A	A	B	A	A	A	A	B	A	A	B	B	B	A	A	A	A	C	B	B	B	C	B	C	A	A	B	A	A	A	B	B	B	B	A	A	B
1313	6A	32641	IWB32641	GENE-1756_564	2	A	A	A	A	A	A	B	A	A	B	A	A	A	A	B	A	A	B	C	B	A	A	A	A	C	B	B	B	C	B	C	A	A	B	A	A	B	B	B	B	B	A	A	B
1314	6A	64917	IWB64917	RFL_Contig5170_1904	2.8	A	A	A	A	B	A	B	A	A	B	A	A	A	A	B	A	A	B	C	B	A	A	A	A	C	B	B	B	C	B	C	A	A	B	A	A	B	B	B	B	B	A	A	B
1315	6A	22216	IWB22216	Excalibur_c13115_348	5.4	A	A	A	A	B	A	B	A	A	B	A	A	A	A	B	A	A	B	B	B	B	A	A	A	B	B	B	B	A	B	B	A	A	B	A	A	B	B	B	B	B	A	A	B
1316	6A	65436	IWB65436	TA001680-1191	5.7	A	A	A	A	B	A	B	A	A	B	A	A	A	A	B	A	A	B	C	B	B	A	A	A	A	B	B	B	A	B	C	A	A	B	A	A	B	B	B	B	B	A	A	B
1317	6A	65474	IWB65474	TA001907-0759	7.4	A	A	A	A	B	A	A	B	A	B	A	A	A	A	B	A	A	B	C	B	B	A	A	B	C	B	B	B	A	B	C	A	A	B	A	A	B	B	B	B	B	A	A	B
1318	6A	36275	IWB36275	IACX8154	8.3	A	A	A	A	B	A	A	B	A	B	A	A	A	A	B	A	A	B	C	B	B	A	A	B	C	B	B	B	A	B	C	A	A	B	B	A	B	B	B	B	B	A	A	B
1319	6A	41245	IWB41245	Kukri_c14679_1082	11.6	A	A	A	A	B	A	A	B	A	B	A	A	A	A	B	A	A	B	C	B	B	A	A	B	B	C	B	B	A	B	B	A	A	B	B	A	B	B	B	B	B	A	A	B
1320	6A	49468	IWB49468	Kukri_rep_c110681_178	11.8	A	A	A	A	B	A	A	B	A	B	A	A	A	A	B	A	A	B	C	B	B	A	A	B	B	B	B	B	A	B	B	A	A	B	B	A	B	B	B	B	B	A	A	B
1321	6A	29014	IWB29014	Excalibur_c8197_381	15.7	A	A	A	B	B	A	A	B	A	B	B	A	A	A	B	A	A	B	C	B	B	A	A	B	B	B	B	B	B	B	B	A	A	B	A	A	B	B	B	B	A	A	A	A
1322	6A	40518	IWB40518	Kukri_c11106_292	16.2	A	A	A	B	B	A	A	B	A	B	B	A	A	A	B	A	A	B	C	B	B	A	A	B	B	C	B	B	B	B	B	A	A	B	A	A	B	B	B	B	A	A	A	A
1323	6A	24037	IWB24037	Excalibur_c23748_452	16.8	A	A	A	B	B	A	A	B	A	B	B	A	A	A	B	A	A	B	C	B	B	A	A	B	B	B	B	B	B	B	B	A	A	B	A	A	B	A	B	B	A	A	A	A
1324	6A	72039	IWB72039	Tdurum_contig50062_934	18.1	A	A	A	B	B	A	A	B	A	B	B	A	A	A	B	A	A	B	C	B	B	B	A	B	B	B	B	B	B	B	B	A	A	B	A	A	B	A	B	B	A	A	A	A
1325	6A	75794	IWA647	wsnp_CAP11_c1114_653767	20.7	A	A	A	B	B	A	A	B	A	C	B	A	A	A	B	A	A	B	C	B	B	B	A	B	B	B	B	B	B	B	B	A	A	B	A	A	B	A	B	B	A	A	A	A
1326	6A	73937	IWB73937	Tdurum_contig9544_2233	30.8	A	A	A	B	B	A	A	B	B	C	B	A	B	B	A	A	A	B	A	B	B	B	A	B	B	B	B	B	B	B	B	B	B	B	A	A	B	A	B	B	A	B	B	A
1327	6A	56842	IWB56842	RAC875_c33488_549	31.9	A	A	A	B	B	A	A	B	B	C	B	A	B	B	A	A	A	B	A	B	B	B	A	B	B	B	B	B	B	B	B	B	B	B	A	A	B	A	B	B	A	B	B	B
1328	6A	12244	IWB12244	BS00105466_51	34.8	A	A	A	B	B	A	A	B	B	C	B	A	B	A	A	A	A	B	A	B	B	B	A	B	B	B	B	B	B	B	B	B	B	B	A	A	B	A	B	B	A	B	B	B
1329	6A	7500	IWB7500	BS00023627_51	35	A	A	B	B	B	A	A	B	B	B	B	A	B	A	A	A	A	B	A	B	B	B	A	B	B	B	B	B	B	B	B	B	B	B	A	A	B	A	B	B	A	B	B	B
1330	6A	76723	IWA2018	wsnp_Ex_c15378_23639387	37.3	A	A	B	B	B	A	A	B	B	B	B	A	B	A	A	A	A	B	A	B	B	B	A	B	B	B	B	B	B	B	B	B	B	B	A	A	B	A	B	B	A	B	A	B
1331	6A	13025	IWB13025	CAP11_c6962_208	42	B	A	B	B	A	A	A	B	B	B	B	A	B	A	B	A	A	B	A	B	B	B	A	B	B	B	B	B	B	B	B	B	B	B	A	B	B	A	B	A	A	B	A	A
1332	6A	10644	IWB10644	BS00073124_51	42.3	B	A	B	B	A	A	A	B	B	B	B	A	B	A	B	A	A	B	A	B	B	B	A	B	B	B	B	B	B	B	B	B	B	B	A	B	B	A	B	A	A	B	A	A
1333	6A	26966	IWB26966	Excalibur_c48569_78	42.5	B	A	B	B	A	A	A	C	B	B	B	A	B	A	B	A	A	B	A	B	B	B	B	B	B	B	B	B	B	B	B	B	B	B	A	B	B	A	B	A	A	B	A	A
1334	6A	35011	IWB35011	IAAV5346	43.7	B	A	A	B	A	A	A	B	B	B	B	A	B	A	B	A	A	B	A	B	B	B	B	B	B	B	B	B	B	B	B	B	B	B	A	B	B	A	B	A	A	B	A	A
1335	6A	10097	IWB10097	BS00067618_51	43.9	B	A	A	B	A	A	A	B	B	B	B	A	C	A	B	A	A	B	A	B	B	B	B	B	B	B	B	C	B	B	A	B	B	B	A	B	B	A	B	A	A	B	A	A
1336	6A	80449	IWA6986	wsnp_Ku_c38451_47086066	48.3	B	A	A	A	A	A	A	B	B	B	B	A	B	A	B	A	A	B	A	B	B	C	B	B	B	C	B	B	B	B	A	B	B	B	A	B	B	B	B	A	A	B	A	B
1337	6A	24032	IWB24032	Excalibur_c23740_225	48.5	B	A	A	A	A	A	A	B	B	B	B	A	B	A	B	A	A	B	A	B	B	B	B	B	B	B	B	B	B	B	A	B	B	B	A	B	B	B	B	A	A	B	A	B
1338	6A	60499	IWB60499	RAC875_c7804_236	48.8	B	A	A	A	A	A	A	B	B	B	B	A	B	A	B	A	A	B	A	B	B	B	B	B	B	B	B	B	B	B	A	B	B	B	A	B	B	B	B	A	A	B	A	B
1339	6A	73396	IWB73396	Tdurum_contig76709_195	49.9	B	A	A	A	A	A	A	B	B	B	B	A	B	A	B	A	A	B	A	B	B	B	B	B	B	B	B	B	B	B	A	A	B	B	A	B	B	A	B	A	A	B	A	B
1340	6A	31234	IWB31234	Excalibur_rep_c74709_56	51.3	B	A	A	A	A	A	A	B	B	B	B	A	B	A	B	A	A	B	A	B	B	B	B	B	B	B	B	B	B	B	A	A	B	B	A	B	B	A	B	A	A	B	A	B
1341	6A	30925	IWB30925	Excalibur_rep_c68125_1097	51.6	B	A	A	A	A	A	A	B	B	B	B	A	B	A	B	A	A	B	A	B	B	B	B	B	B	B	B	B	B	B	A	A	B	B	A	B	B	A	B	A	A	B	A	B
1342	6A	52504	IWB52504	Ra_c70188_270	51.8	B	A	A	A	A	A	A	B	B	B	B	A	B	A	B	A	A	B	A	B	B	B	B	B	B	B	B	B	B	B	A	A	B	B	A	B	B	A	B	A	A	B	A	B
1343	6A	34964	IWB34964	IAAV5035	52.4	B	A	A	A	A	A	A	B	A	B	B	A	B	A	B	A	A	B	A	B	B	B	B	B	B	B	B	B	B	B	A	A	B	B	A	B	B	A	B	A	A	B	A	B
1344	6A	6511	IWB6511	BS00012028_51	52.6	B	A	A	A	A	A	A	B	A	B	B	A	B	A	B	A	A	B	A	B	B	B	B	B	B	B	B	B	B	B	A	A	B	B	A	B	B	A	B	A	A	B	A	B
1345	6A	76443	IWA1671	wsnp_Ex_c1269_2435294	53.2	B	A	A	A	A	A	A	B	A	B	B	A	B	A	B	A	A	B	A	B	B	B	B	B	B	B	B	B	B	B	A	A	B	B	A	B	B	A	B	A	A	B	A	B
1346	6A	47270	IWB47270	Kukri_c65887_282	54	B	A	A	A	A	A	A	B	A	B	B	A	B	A	B	A	A	B	A	B	B	B	B	B	B	B	B	B	B	B	A	A	B	B	A	B	B	A	B	A	A	B	A	B
1347	6A	75144	IWB75144	tplb0057g20_780	54.3	B	A	A	A	A	A	A	B	A	B	B	A	B	A	B	A	A	B	A	B	B	B	B	B	B	B	B	B	B	B	A	A	B	B	A	B	B	A	B	A	A	B	A	B
1348	6A	61092	IWB61092	RAC875_c93959_96	89	B	B	A	A	A	B	A	A	A	C	B	B	B	A	A	A	B	B	B	A	A	B	B	B	B	B	B	B	A	A	A	B	C	A	A	B	B	A	C	B	B	B	B	B
1349	6A	6825	IWB6825	BS00021965_51	89.5	B	B	A	A	A	B	A	A	A	A	B	B	B	A	A	A	B	B	B	A	C	B	B	A	B	B	B	B	A	A	A	B	C	A	A	B	B	A	A	B	B	B	B	B
1350	6A	50538	IWB50538	Kukri_rep_c95718_868	94.8	B	B	B	A	A	B	A	A	A	B	B	B	B	A	A	A	B	B	B	A	B	B	B	A	B	C	B	B	A	A	A	B	B	A	A	C	B	A	A	B	B	B	B	B
1351	6A	7048	IWB7048	BS00022372_51	95.4	B	B	B	A	A	B	A	A	A	B	B	B	B	A	A	A	B	B	B	A	B	B	B	A	B	C	B	B	A	A	A	B	B	A	A	C	B	C	A	B	B	B	B	B
1352	6A	28546	IWB28546	Excalibur_c7002_314	97.1	B	B	B	A	A	B	A	A	A	B	B	B	B	A	A	A	B	B	B	A	B	B	B	A	B	A	B	B	A	A	A	B	B	A	A	C	B	A	A	B	B	B	B	B
1353	6A	37899	IWB37899	JD_c9656_680	97.3	B	B	B	A	A	B	A	A	A	B	B	B	B	A	A	A	B	B	B	A	B	B	B	A	B	A	B	B	A	A	A	B	B	A	A	C	B	A	C	B	B	B	B	B
1354	6A	29501	IWB29501	Excalibur_c95213_449	97.6	B	B	B	A	A	B	A	A	A	B	B	B	B	A	A	A	B	B	B	A	B	B	B	A	B	A	B	B	A	A	A	B	B	A	A	B	B	A	C	B	B	B	B	B
1355	6A	34813	IWB34813	IAAV40	97.9	B	B	B	A	A	B	A	A	A	B	B	B	B	A	A	A	B	B	B	A	B	B	B	A	B	A	B	B	A	A	A	B	B	A	A	C	B	A	A	B	B	B	B	B
1356	6A	75641	IWA441	wsnp_BF291974A_Ta_2_1	98.2	B	B	B	A	A	B	A	A	A	B	B	B	B	A	A	A	B	B	B	A	B	B	B	A	B	A	B	B	A	A	A	B	B	A	A	C	B	A	A	B	B	B	B	B
1357	6A	7970	IWB7970	BS00034337_51	98.5	B	B	B	A	A	B	A	A	A	B	B	B	B	A	A	A	B	B	B	A	B	B	B	A	B	A	B	B	A	A	B	B	B	A	A	A	B	A	C	B	B	B	B	B
1358	6A	8819	IWB8819	BS00060796_51	98.7	B	B	B	A	A	B	A	A	A	B	B	B	B	A	A	A	B	B	B	A	B	B	B	A	B	A	B	B	A	A	B	B	B	A	A	C	B	A	B	B	B	B	B	B
1359	6A	60883	IWB60883	RAC875_c8721_212	99.3	B	B	B	A	A	B	A	A	A	B	B	B	B	A	A	A	B	B	B	A	B	B	B	A	B	A	B	B	A	A	B	B	B	A	A	C	B	A	A	B	B	B	B	B
1360	6A	59857	IWB59857	RAC875_c6429_55	99.6	B	B	B	A	A	B	A	A	A	B	B	B	B	A	A	A	B	B	A	A	B	B	B	A	B	A	B	B	A	A	B	B	B	A	A	C	B	A	A	B	B	B	B	B
1361	6A	51469	IWB51469	Ra_c2235_1339	99.8	B	B	B	A	A	B	A	C	A	B	B	B	B	A	A	C	B	B	A	A	B	B	B	A	B	A	B	B	A	A	B	B	B	A	A	C	B	A	C	B	B	B	B	B
1362	6A	3554	IWB3554	BobWhite_c47040_305	100.4	B	B	B	A	A	B	A	A	A	B	B	B	B	A	A	A	B	B	A	A	B	B	B	A	B	C	B	B	A	A	B	B	B	A	A	B	B	A	A	B	B	B	B	B
1363	6A	8389	IWB8389	BS00045156_51	100.7	B	B	B	A	A	B	A	A	A	B	B	B	B	A	A	A	B	B	A	A	B	B	B	A	B	A	B	B	A	A	B	B	B	A	A	C	C	A	C	B	B	B	B	B
1364	6A	25644	IWB25644	Excalibur_c35871_596	101	B	B	B	A	A	B	A	A	A	B	B	B	B	A	A	A	B	B	A	A	B	B	B	A	B	C	B	B	A	A	A	B	B	A	A	A	B	A	A	C	B	B	B	B
1365	6B	76790	IWA2098	wsnp_Ex_c16090_24522660	0	C	A	B	B	A	A	B	A	B	A	B	B	A	A	A	A	B	B	B	B	A	C	A	A	A	A	A	B	B	A	A	A	A	B	A	A	A	B	B	A	A	B	A	C
1366	6B	3282	IWB3282	BobWhite_c43135_397	0.3	C	A	B	B	A	A	B	A	B	A	B	B	A	A	A	A	B	B	B	B	A	B	A	A	A	A	A	B	B	A	A	A	A	B	A	A	A	B	B	A	A	B	A	C
1367	6B	59377	IWB59377	RAC875_c58425_286	1.1	B	A	B	B	A	A	B	A	B	A	B	B	A	A	A	A	B	B	B	B	A	B	A	B	A	A	A	B	B	A	A	A	A	B	A	A	A	B	B	A	A	B	A	C
1368	6B	416	IWB416	BobWhite_c12846_389	1.7	B	A	B	B	A	A	B	A	B	A	B	B	A	A	A	A	B	B	B	B	A	C	A	B	A	A	A	B	B	A	A	A	A	B	A	A	A	B	B	A	A	B	A	C
1369	6B	8673	IWB8673	BS00055768_51	3.1	B	A	B	B	A	A	B	A	B	A	B	B	A	A	A	A	B	B	B	B	A	C	A	A	A	A	A	B	B	A	A	A	A	B	A	B	A	B	B	A	A	B	A	C
1370	6B	70382	IWB70382	Tdurum_contig32779_217	3.3	B	A	B	B	A	A	B	A	B	A	B	B	A	A	A	A	B	B	B	B	A	C	A	A	A	A	A	B	B	A	A	A	A	B	A	B	A	B	B	A	A	B	A	C
1371	6B	61429	IWB61429	RAC875_rep_c105224_352	3.9	B	A	B	B	A	A	B	A	B	A	B	B	A	A	A	A	B	B	B	B	A	C	A	A	A	A	A	B	B	A	A	A	A	B	A	B	A	B	B	A	A	B	A	C
1372	6B	28633	IWB28633	Excalibur_c72517_227	6.2	B	A	B	B	A	A	B	A	B	B	B	B	A	A	A	A	B	B	B	A	A	C	A	A	A	C	A	B	B	A	A	A	A	B	A	B	A	B	B	A	A	A	A	B
1373	6B	76633	IWA1901	wsnp_Ex_c14481_22485922	13.7	B	B	B	B	A	A	B	A	B	B	B	B	B	B	A	A	B	A	B	B	A	B	A	A	A	A	A	C	B	A	A	B	A	B	B	B	A	B	B	A	A	A	A	C
1374	6B	7937	IWB7937	BS00033642_51	18.2	B	B	B	B	A	A	B	A	B	B	B	B	B	B	A	A	B	A	B	B	A	C	A	A	A	A	A	A	B	A	A	B	B	B	B	B	A	B	B	A	A	A	A	A
1375	6B	73576	IWB73576	Tdurum_contig82504_154	19.3	B	B	B	B	A	A	B	A	B	B	B	B	B	B	A	A	B	A	B	B	A	B	A	A	A	A	A	A	B	A	A	B	B	B	B	B	A	B	B	A	A	A	A	A
1376	6B	72921	IWB72921	Tdurum_contig62941_85	24.1	B	B	A	B	A	A	B	A	A	B	B	B	B	B	A	A	B	A	B	B	B	B	A	A	A	C	A	C	B	A	A	B	B	B	B	B	A	B	B	A	A	A	A	A
1377	6B	12597	IWB12597	BS00110803_51	24.4	B	B	A	B	A	A	B	A	A	B	B	B	B	B	A	A	B	A	B	B	B	B	A	A	A	C	A	C	B	A	A	B	B	B	B	B	A	B	B	A	A	A	A	A
1378	6B	48897	IWB48897	Kukri_rep_c103613_253	24.9	B	B	A	B	A	A	B	A	A	B	B	B	B	B	A	A	B	A	B	B	B	B	A	A	A	C	A	C	B	A	A	B	B	B	B	B	A	B	B	A	A	A	A	A
1379	6B	53807	IWB53807	RAC875_c13920_747	25.2	B	B	A	B	A	A	B	A	A	B	B	B	B	B	A	A	B	A	B	B	B	B	A	A	A	C	A	C	B	A	A	B	B	B	B	B	A	B	B	A	A	A	A	A
1380	6B	2076	IWB2076	BobWhite_c27216_137	28.7	B	B	A	B	A	B	B	A	A	B	B	B	B	B	A	A	B	A	B	A	B	B	A	A	A	C	B	A	B	A	A	B	B	B	B	B	A	B	B	A	A	A	A	A
1381	6B	71937	IWB71937	Tdurum_contig48939_754	29.6	B	B	A	B	A	B	B	A	A	B	B	B	B	B	A	A	B	A	B	A	B	C	A	A	B	A	B	C	B	A	A	B	B	B	B	B	A	B	B	A	A	A	A	A
1382	6B	13395	IWB13395	CAP12_c4100_640	29.8	B	B	A	B	A	B	B	A	A	B	B	B	B	B	A	A	B	A	B	A	B	C	A	A	B	A	B	C	B	A	A	B	B	B	B	B	A	B	B	A	A	C	C	C
1383	6B	35654	IWB35654	IACX11060	30.1	B	B	A	B	A	B	B	A	A	B	B	B	B	B	A	A	B	B	B	A	B	B	A	A	B	C	B	C	B	A	A	B	B	B	B	B	A	B	B	A	A	A	A	A
1384	6B	58613	IWB58613	RAC875_c50143_604	31.2	A	B	A	B	A	B	B	A	A	B	B	B	B	B	A	A	B	B	B	A	B	B	A	A	B	C	B	B	B	A	A	B	B	B	B	B	A	B	B	A	A	A	A	A
1385	6B	10993	IWB10993	BS00078150_51	32.3	A	B	A	B	A	B	B	A	A	B	B	B	B	B	A	A	B	B	B	A	B	B	A	A	B	C	B	B	B	A	A	B	B	B	B	B	A	B	B	A	A	A	A	A
1386	6B	17741	IWB17741	D_GA8KES401C8IH7_354	32.6	A	B	A	B	A	B	B	A	A	B	B	B	B	B	A	A	B	B	B	A	B	B	A	A	A	B	B	B	B	A	A	B	B	B	B	B	A	B	B	A	A	A	A	A
1387	6B	26479	IWB26479	Excalibur_c43691_336	32.9	A	B	A	B	A	B	B	A	A	B	B	C	B	B	A	A	B	B	B	A	B	B	A	A	B	C	B	B	B	A	A	B	B	B	B	B	A	B	B	A	A	A	A	A
1388	6B	48399	IWB48399	Kukri_c9507_142	33.1	A	B	A	B	A	B	B	A	A	B	B	B	B	B	A	A	B	B	B	A	B	B	A	A	B	A	B	B	B	A	A	B	B	B	B	B	A	B	B	A	A	A	A	A
1389	6B	743	IWB743	BobWhite_c1509_622	33.4	A	B	A	B	A	B	B	A	A	B	B	B	B	B	A	A	B	B	B	A	B	B	A	A	B	C	B	B	B	A	A	B	B	B	B	B	A	B	B	A	A	A	A	A
1390	6B	27622	IWB27622	Excalibur_c56046_379	34	A	C	A	B	A	B	B	A	A	B	B	B	B	B	A	A	B	B	B	A	B	B	A	A	B	A	B	B	B	C	A	B	B	C	B	B	A	B	B	A	A	A	A	A
1391	6B	9097	IWB9097	BS00063631_51	34.6	A	B	A	B	A	B	B	A	A	B	B	B	B	B	A	A	B	B	B	A	B	B	A	A	B	A	B	B	B	A	A	B	B	B	B	B	A	B	B	A	A	A	A	A
1392	6B	76118	IWA1251	wsnp_CD452643B_Ta_2_1	35.4	A	B	A	B	A	B	B	A	A	B	B	B	B	B	A	A	A	B	B	A	B	B	A	A	C	A	B	B	B	A	A	B	B	B	B	B	A	B	B	A	A	A	A	A
1393	6B	12855	IWB12855	CAP11_c3599_113	35.7	A	B	A	B	A	B	B	A	A	B	B	B	B	B	A	A	A	B	B	A	B	B	A	A	B	C	B	B	B	A	A	B	B	B	B	B	A	B	B	A	A	A	A	A
1394	6B	72677	IWB72677	Tdurum_contig5968_365	37.1	A	B	A	B	A	B	B	A	A	B	B	B	B	B	A	A	A	A	B	A	B	B	A	A	B	B	B	B	B	A	A	B	B	B	B	B	A	B	B	A	A	A	A	A
1395	6B	70448	IWB70448	Tdurum_contig33717_301	37.3	A	B	A	B	A	B	B	A	A	B	B	B	B	B	A	A	A	A	B	A	B	B	A	A	B	B	B	B	B	A	A	B	B	B	B	B	A	B	B	A	A	A	A	A
1396	6B	25654	IWB25654	Excalibur_c35964_205	39.3	A	B	A	B	A	B	B	A	A	B	B	B	B	B	A	A	A	A	B	A	B	B	A	A	B	C	B	B	B	A	A	B	B	B	B	B	A	B	B	A	A	A	A	A
1397	6B	75807	IWA670	wsnp_CAP11_c1432_806102	39.5	A	B	A	B	A	B	B	A	A	B	B	B	B	B	A	A	A	A	B	A	B	B	A	A	B	C	B	B	B	A	A	B	B	B	B	B	A	B	C	B	A	A	A	A
1398	6B	47763	IWB47763	Kukri_c78348_266	42.1	A	B	A	B	A	A	B	A	A	B	B	B	B	B	A	A	B	A	B	A	B	B	A	A	B	C	B	B	B	A	A	B	B	B	B	B	A	B	B	B	A	A	A	A
1399	6B	44150	IWB44150	Kukri_c3292_670	42.4	A	B	A	B	A	A	B	A	A	B	B	B	B	B	A	A	B	A	B	A	B	B	A	A	B	B	B	B	B	A	A	B	B	B	B	B	A	B	B	B	A	A	A	A
1400	6B	33843	IWB33843	GENE-4221_94	46.1	A	A	A	B	A	A	B	A	A	A	B	B	B	B	A	A	B	A	B	A	B	B	A	A	B	C	B	A	B	A	A	B	B	B	B	B	A	B	B	A	A	A	A	A
1401	6B	12395	IWB12395	BS00109036_51	46.7	A	A	A	B	A	A	B	A	A	A	B	B	B	B	A	A	B	A	B	A	B	B	A	B	B	B	B	A	B	A	A	B	B	B	B	B	A	B	B	A	A	A	A	A
1402	6B	58733	IWB58733	RAC875_c5129_280	46.9	A	A	A	B	A	A	B	A	A	A	B	B	B	B	A	A	B	A	B	A	B	B	A	B	B	B	B	A	B	A	A	B	B	B	B	B	A	B	B	A	A	A	A	A
1403	6B	290	IWB290	BobWhite_c12013_977	47.2	A	A	A	B	A	A	B	A	A	A	B	B	B	B	A	A	B	A	B	A	B	B	A	B	B	C	B	A	B	A	A	B	B	B	B	B	A	B	C	A	A	A	A	A
1404	6B	66124	IWB66124	TA014972-0344	47.5	A	A	A	B	A	A	B	A	A	A	B	B	B	B	A	A	B	A	B	A	B	B	A	B	B	B	B	A	B	A	A	B	B	B	B	B	A	B	B	A	A	A	A	A
1405	6B	33761	IWB33761	GENE-4069_85	48.3	A	A	A	B	A	A	B	A	A	A	B	B	B	B	A	A	B	A	B	A	B	B	A	B	A	B	B	A	B	A	A	B	B	B	B	B	A	B	B	A	A	A	A	A
1406	6B	46184	IWB46184	Kukri_c5168_162	49.7	A	A	A	B	A	A	B	A	A	A	B	B	B	B	A	A	B	A	B	A	B	B	A	B	A	B	B	A	B	A	A	B	B	B	B	B	A	A	B	A	A	A	A	A
1407	6B	7881	IWB7881	BS00032243_51	50	A	A	A	B	A	A	B	A	A	A	B	B	B	B	A	A	B	A	B	A	B	B	A	B	A	B	B	A	B	A	A	B	B	B	B	B	A	A	C	A	A	A	A	A
1408	6B	9964	IWB9964	BS00067129_51	50.2	A	A	A	B	A	A	B	A	A	A	B	B	B	B	A	A	B	A	B	A	B	B	A	B	A	C	B	A	B	A	A	B	B	B	B	B	A	A	B	A	A	A	A	A
1409	6B	45036	IWB45036	Kukri_c40428_72	50.8	A	A	A	B	A	A	B	A	A	A	B	B	B	B	B	A	B	A	B	A	B	B	A	B	A	B	B	A	B	A	A	B	B	B	B	B	A	A	B	A	A	A	A	A
1410	6B	78792	IWA4717	wsnp_Ex_c7713_13153321	51	A	A	A	B	A	A	B	A	A	A	B	B	B	B	B	A	B	A	B	A	B	B	A	B	A	B	B	A	B	B	A	B	B	B	B	B	A	A	B	A	A	A	A	A
1411	6B	60708	IWB60708	RAC875_c82640_416	51.6	A	A	A	B	A	A	B	A	A	A	B	B	B	B	B	A	B	A	C	A	B	B	A	B	A	B	B	A	B	B	A	B	B	B	B	B	A	A	B	A	A	A	A	A
1412	6B	8068	IWB8068	BS00036830_51	52.1	A	A	A	B	A	A	B	A	A	A	B	B	B	B	B	A	B	A	C	A	B	B	A	B	B	B	B	A	B	B	A	B	B	B	B	B	A	A	B	A	A	A	A	A
1413	6B	65959	IWB65959	TA005327-0480	53.8	A	A	A	B	A	A	B	A	A	A	B	B	B	B	B	A	B	A	C	A	B	B	A	B	B	B	B	A	B	B	A	B	B	B	B	B	A	A	B	A	A	A	A	A
1414	6B	19986	IWB19986	Ex_c17379_1431	55.8	A	A	A	B	A	A	B	A	A	A	B	B	B	B	B	A	B	A	C	A	B	B	A	B	B	C	B	A	B	B	A	B	B	B	B	B	A	A	C	A	A	A	A	A
1415	6B	24596	IWB24596	Excalibur_c276_1585	58.7	A	A	A	B	A	A	B	A	A	A	B	B	B	B	A	A	B	A	C	A	B	B	A	B	B	C	B	A	B	B	A	B	B	B	B	B	A	A	A	A	A	A	A	A
1416	6B	36435	IWB36435	Jagger_c1231_85	76.7	A	A	B	B	A	A	A	B	A	A	B	A	B	B	A	A	B	A	A	A	A	A	A	A	B	B	B	A	B	B	A	B	B	B	A	A	A	A	C	A	A	A	A	A
1417	6B	71379	IWB71379	Tdurum_contig42927_1141	77.5	A	A	B	B	A	A	A	B	A	A	B	A	B	B	A	A	B	A	A	A	A	A	A	A	B	B	B	A	B	B	A	B	B	B	A	A	A	A	A	A	A	A	A	A
1418	6B	59005	IWB59005	RAC875_c5413_1237	77.8	A	A	B	B	A	A	A	B	A	A	B	A	B	B	A	A	B	A	A	A	A	A	A	A	B	B	B	A	B	B	A	B	B	B	A	A	A	A	A	A	A	A	A	A
1419	6B	3121	IWB3121	BobWhite_c40465_344	78.1	A	A	B	B	A	A	A	B	A	A	B	A	B	B	A	A	B	A	A	A	A	A	A	A	B	A	B	A	B	B	A	B	B	B	A	A	A	A	A	A	A	A	A	A
1420	6B	58199	IWB58199	RAC875_c45987_106	78.9	A	A	B	B	A	A	A	B	A	A	B	A	B	B	A	A	B	A	A	A	A	A	A	A	B	B	B	A	B	B	A	B	B	B	A	A	A	A	A	A	A	A	A	A
1421	6B	33694	IWB33694	GENE-3965_471	79.1	A	A	B	B	A	A	A	B	A	A	B	A	B	B	A	A	B	A	A	A	A	A	A	A	B	C	B	A	B	B	A	B	B	B	A	A	A	A	A	A	A	A	A	A
1422	6B	59306	IWB59306	RAC875_c57692_88	79.7	A	A	B	B	A	A	A	B	A	A	B	A	B	B	A	A	B	A	A	A	A	A	A	A	B	B	B	A	B	A	A	B	B	B	A	A	A	A	A	A	A	A	A	A
1423	6B	33847	IWB33847	GENE-4225_117	80	A	A	B	B	A	A	A	B	A	A	B	A	B	B	A	A	B	A	A	A	A	A	A	A	B	B	B	A	B	A	A	B	B	B	A	A	A	A	A	A	A	A	A	A
1424	6B	10851	IWB10851	BS00076101_51	83.4	A	A	B	B	A	A	A	A	A	A	B	A	B	B	A	B	B	B	A	A	A	A	A	A	B	B	A	A	B	A	A	B	B	B	A	A	A	A	A	A	A	A	A	A
1425	6B	54633	IWB54633	RAC875_c1823_1681	83.7	A	A	B	B	A	A	A	A	A	A	B	A	B	B	A	B	B	B	A	A	A	A	A	A	B	C	A	B	B	A	A	B	B	B	A	A	A	A	A	A	A	A	A	A
1426	6D	78233	IWA4000	wsnp_Ex_c4789_8550135	0	B	B	B	A	B	B	A	B	A	B	B	B	B	A	A	B	A	A	B	B	A	B	B	B	A	A	B	A	B	B	B	B	A	A	A	B	A	A	B	B	A	A	A	B
1427	6D	80209	IWA6673	wsnp_Ku_c19587_29102203	0.3	B	B	B	A	B	B	A	B	A	B	B	B	B	A	A	B	A	A	B	B	A	B	B	B	A	A	B	A	B	B	B	B	A	A	A	B	A	A	B	B	A	A	A	B
1428	6D	77810	IWA3461	wsnp_Ex_c3405_6252997	1.1	B	B	B	A	B	B	A	B	A	A	B	B	B	A	A	B	A	A	B	B	A	B	B	B	A	A	B	A	B	B	B	B	A	A	A	B	A	A	B	B	A	A	A	B
1429	6D	4285	IWB4285	BobWhite_c7090_522	1.4	B	B	B	A	B	B	A	B	A	A	B	B	B	A	A	B	A	A	B	B	C	B	B	B	A	A	B	A	B	B	B	B	A	A	A	B	A	A	B	B	A	A	A	B
1430	6D	31346	IWB31346	Excalibur_rep_c84264_67	1.7	B	B	B	A	B	B	A	B	A	A	B	B	B	A	A	B	A	A	B	B	C	C	B	B	A	A	B	A	B	B	B	B	A	A	A	B	A	A	B	B	A	A	A	B
1431	6D	49820	IWB49820	Kukri_rep_c68823_315	1.9	B	B	B	A	B	B	A	B	A	A	B	B	B	A	A	B	A	A	B	B	B	B	B	B	A	A	B	A	B	B	B	B	A	A	A	B	A	A	B	B	A	A	A	B
1432	6D	15852	IWB15852	D_contig17056_55	2.5	B	B	B	A	B	B	A	B	A	A	B	B	B	A	A	B	A	A	B	B	B	B	B	B	A	A	B	A	B	B	B	B	A	A	A	B	A	A	B	B	A	A	A	B
1433	6D	18587	IWB18587	D_GBUVHFX01BJVOK_322	12.8	B	B	A	A	A	B	A	B	B	B	B	B	B	B	A	B	A	A	B	B	B	B	B	A	A	A	A	A	B	B	B	B	A	B	A	B	A	B	B	B	A	A	A	B
1434	6D	75262	IWB75262	tplb0060j17_363	16.4	B	B	A	A	A	B	A	B	B	B	B	B	B	B	A	B	A	A	B	B	B	B	B	A	A	A	A	A	B	B	B	B	A	B	A	B	A	B	B	B	A	A	A	A
1435	6D	74251	IWB74251	tplb0025k19_1539	16.6	B	B	A	A	A	B	A	B	B	B	B	B	B	B	A	B	A	A	B	B	B	B	B	A	A	A	A	C	B	B	B	B	A	B	C	B	A	B	B	B	A	A	A	A
1436	6D	5908	IWB5908	BS00003852_51	26.4	B	B	A	A	A	B	A	B	B	B	B	B	B	B	A	B	A	A	B	A	B	B	B	A	A	A	B	A	B	B	B	B	A	B	C	B	A	C	B	B	A	A	A	C
1437	6D	74684	IWB74684	tplb0040h19_458	30.7	A	B	A	A	A	B	A	B	B	B	B	A	B	B	B	B	A	A	B	A	A	C	B	A	A	A	B	A	B	B	B	B	B	B	C	B	A	C	B	B	A	A	A	C
1438	6D	15253	IWB15253	D_contig03207_141	40.6	A	B	A	B	A	A	A	B	B	B	A	A	B	B	B	B	A	B	B	A	B	A	B	A	A	A	B	A	A	B	B	B	B	A	B	A	B	B	B	A	A	A	B	B
1439	6D	81537	IWA8540	wsnp_RFL_Contig3946_4380285	40.8	A	B	A	B	A	A	A	B	B	B	A	A	B	B	B	B	A	B	B	A	B	A	B	A	A	A	B	A	A	B	B	B	B	A	B	A	B	B	B	A	A	A	B	B
1440	6D	56138	IWB56138	RAC875_c27962_341	43.1	B	B	A	B	A	A	B	A	B	B	A	A	B	B	B	B	A	B	B	A	B	A	B	A	A	A	B	A	A	B	B	A	B	A	B	A	B	B	B	A	A	A	B	B
1441	6D	65231	IWB65231	RFL_Contig6162_597	44.2	B	B	A	B	A	A	B	A	B	B	A	A	B	B	B	B	A	B	B	A	B	C	B	A	A	A	B	A	A	B	B	A	B	A	B	A	B	B	B	A	A	A	B	B
1442	6D	29676	IWB29676	Excalibur_c9970_273	49	B	B	B	B	A	A	B	A	B	B	A	A	B	B	B	B	A	B	B	A	A	A	B	A	A	A	B	A	A	B	B	A	B	A	B	A	A	B	B	A	A	A	B	B
1443	6D	18875	IWB18875	D_GCE8AKX02GZU30_69	49.5	B	B	B	A	A	A	B	A	B	B	A	A	B	B	B	B	A	B	B	A	A	C	B	A	A	A	B	A	A	B	B	A	B	A	B	A	B	B	B	A	A	A	B	B
1444	6D	44500	IWB44500	Kukri_c35949_523	49.8	B	B	B	A	A	A	B	A	B	B	A	A	B	B	B	B	A	B	B	A	A	A	B	A	A	A	B	A	A	B	B	A	B	A	B	A	B	B	B	A	A	A	B	B
1445	6D	64459	IWB64459	RFL_Contig3710_359	52.1	B	B	B	A	A	A	B	A	B	B	A	A	B	B	B	B	A	B	B	A	A	C	B	A	A	C	B	B	A	B	B	A	B	A	B	A	B	B	A	A	A	A	B	B
1446	6D	16167	IWB16167	D_contig24171_152	57.6	B	B	B	B	A	B	B	A	B	B	B	A	B	B	B	B	A	B	B	A	A	A	B	A	A	A	B	B	B	B	B	A	B	A	B	A	B	B	A	A	A	A	B	B
1447	6D	81364	IWA8245	wsnp_RFL_Contig1427_580520	57.8	B	B	B	B	A	B	B	A	B	B	B	A	B	B	B	B	A	B	B	A	A	C	B	A	A	C	B	B	B	B	B	A	B	A	B	A	B	B	A	A	A	A	B	B
1448	6D	44501	IWB44501	Kukri_c35951_337	58.1	B	B	B	B	A	B	B	A	B	B	B	A	B	B	B	B	A	B	B	A	A	A	B	A	A	A	B	B	B	B	B	A	B	A	B	A	B	B	A	A	A	A	B	B
1449	6D	35645	IWB35645	IACX10982	60.7	B	B	B	B	A	B	B	A	B	B	B	A	A	B	B	B	A	B	A	A	A	A	B	B	A	A	B	B	B	B	B	A	B	A	B	A	B	B	A	B	A	A	B	A
1450	6D	18817	IWB18817	D_GCE8AKX01CTXDI_46	62.3	B	B	B	B	A	B	B	A	B	B	B	A	A	A	B	B	A	B	A	A	A	A	B	B	A	A	B	B	B	B	B	A	B	A	B	A	B	B	A	B	A	A	B	A
1451	6D	81394	IWA8292	wsnp_RFL_Contig2100_1362130	62.6	B	B	B	B	A	B	B	A	B	B	B	A	A	A	B	B	A	B	A	A	A	A	B	B	A	A	B	B	B	B	B	A	B	A	B	A	B	B	A	B	A	A	B	A
1452	6D	18096	IWB18096	D_GB5Y7FA02HFOHW_127	68.7	A	A	B	B	A	B	B	A	B	B	B	A	A	A	B	B	A	B	A	B	A	A	A	B	A	A	B	B	B	B	B	A	B	A	B	A	B	B	A	B	A	B	A	A
1453	6D	80917	IWA7616	wsnp_Ra_c13881_21836489	70.7	A	A	B	B	A	B	B	A	B	B	B	A	A	A	B	B	A	B	A	B	A	A	A	B	A	A	B	B	B	B	B	A	B	A	B	A	B	B	A	B	A	B	A	A
1454	6D	25578	IWB25578	Excalibur_c3526_106	89.8	A	A	B	A	A	B	B	B	A	B	B	A	A	A	B	B	B	B	B	A	B	B	A	A	A	A	B	C	B	A	B	A	B	A	B	A	A	B	A	B	A	B	A	C
1455	6D	42267	IWB42267	Kukri_c20152_490	91.8	A	A	B	A	A	B	B	B	A	A	B	A	A	A	B	B	B	B	B	A	B	B	A	A	A	A	B	B	B	B	B	A	B	A	B	A	A	B	A	B	A	B	A	B
1456	6D	54977	IWB54977	RAC875_c20242_284	93	A	A	B	B	A	B	B	B	A	A	B	A	A	A	B	B	B	B	B	A	B	B	A	A	A	C	B	B	B	B	B	A	B	A	B	A	A	B	C	B	A	B	A	B
1457	6D	17785	IWB17785	D_GA8KES401DM316_316	93.2	A	A	B	B	A	B	B	B	A	A	B	A	A	A	B	B	B	B	B	A	B	B	A	A	A	A	B	B	B	B	B	A	B	A	B	A	A	B	A	B	A	B	A	B
1458	6D	63310	IWB63310	RAC875_rep_c92223_254	93.5	A	A	B	B	A	B	B	B	A	A	B	A	A	A	B	B	B	B	B	A	B	B	A	A	A	A	B	C	C	B	B	A	B	A	B	A	A	B	A	B	A	B	A	B
1459	6D	46628	IWB46628	Kukri_c57006_127	97.7	A	B	B	B	A	B	B	A	A	A	B	A	A	A	B	B	B	B	B	A	B	B	A	B	A	A	A	B	B	A	B	A	B	A	B	A	A	B	A	B	B	B	A	B
1460	6D	24811	IWB24811	Excalibur_c2925_238	98.8	A	B	B	B	A	B	B	A	A	A	B	A	A	A	B	B	B	B	B	A	B	B	A	B	A	A	A	B	B	A	B	A	B	A	B	A	A	B	A	B	B	B	A	B
1461	6D	81464	IWA8408	wsnp_RFL_Contig2937_2798959	105.6	A	B	B	A	A	B	B	A	A	A	B	B	A	A	B	B	B	B	B	B	B	B	A	B	A	A	A	B	B	A	B	A	B	A	A	B	A	B	A	B	B	B	A	B
1462	6D	81513	IWA8503	wsnp_RFL_Contig3708_3946935	109.1	A	A	B	A	A	B	B	A	A	A	B	B	A	A	A	B	B	B	B	B	B	B	A	B	A	C	A	B	A	B	B	A	A	A	A	B	A	B	C	B	B	B	B	B
1463	6D	17801	IWB17801	D_GA8KES401EBZR6_76	110.3	A	A	B	A	A	B	B	A	A	A	B	B	A	A	A	B	C	B	B	B	A	B	A	B	A	A	B	B	A	B	B	A	A	A	A	B	A	B	A	B	B	B	B	B
1464	6D	2065	IWB2065	BobWhite_c27145_731	110.8	A	A	B	A	A	B	B	A	A	A	B	B	A	A	A	B	B	B	B	B	A	B	A	B	A	A	B	B	A	B	B	A	A	A	A	B	A	B	C	B	B	B	B	B
1465	6D	34557	IWB34557	IAAV2433	111.1	A	A	B	A	A	B	B	A	A	A	B	B	A	A	A	B	B	B	B	B	A	B	A	B	A	A	A	B	A	B	B	A	A	A	A	B	A	B	A	B	B	B	B	B
1466	6D	48102	IWB48102	Kukri_c8698_292	111.6	A	A	B	A	A	B	B	A	A	A	B	B	A	A	A	B	B	B	B	B	A	B	A	B	A	A	A	B	A	B	B	A	A	A	A	B	A	B	A	B	B	B	B	B
1467	6D	33813	IWB33813	GENE-4178_89	112.5	A	A	B	A	A	B	B	A	A	A	B	B	A	A	A	B	B	B	B	B	A	A	A	B	A	A	A	B	A	B	B	A	A	A	A	B	A	B	C	B	B	B	B	B
1468	6D	34979	IWB34979	IAAV5158	114.1	A	A	B	A	A	B	B	A	A	A	A	B	A	A	A	B	B	B	B	B	A	A	A	B	A	B	A	B	A	B	B	A	A	A	A	B	A	B	A	B	B	B	B	B
1469	6D	34312	IWB34312	IAAV1012	114.4	A	A	B	A	A	B	B	A	A	A	A	B	A	A	A	B	B	B	B	B	A	A	A	B	A	B	A	B	A	B	B	A	A	A	A	B	A	B	A	B	B	B	B	B
1470	6D	21244	IWB21244	Ex_c7086_154	114.7	A	A	B	A	A	B	B	A	A	A	A	B	A	A	A	B	B	B	B	B	A	A	A	B	A	B	A	B	A	B	B	A	A	A	A	B	A	B	A	B	B	B	B	B
1471	6D	28990	IWB28990	Excalibur_c8134_1319	115.2	A	A	B	A	A	B	B	A	A	B	A	B	A	A	A	B	B	B	B	B	A	A	A	B	A	B	A	B	A	B	B	A	A	A	A	B	A	B	A	B	B	B	B	B
1472	6D	76234	IWA1406	wsnp_Ex_c10910_17729008	115.5	A	A	B	A	A	B	B	A	A	B	A	B	A	A	A	B	B	B	B	B	A	A	A	B	A	B	A	B	A	B	B	A	A	A	A	B	A	B	A	B	B	B	B	B
1473	6D	15598	IWB15598	D_contig10996_530	116	A	A	B	A	A	B	B	A	A	B	A	B	A	A	A	B	B	B	B	B	A	A	A	B	A	B	A	B	A	B	B	A	A	A	A	B	A	B	A	B	B	B	B	B
1474	6D	53907	IWB53907	RAC875_c14354_907	116.3	A	A	B	A	A	B	B	A	A	B	A	B	A	A	A	B	B	B	B	B	A	A	A	B	A	B	A	B	A	B	B	A	A	A	A	B	A	B	A	B	B	B	B	B
1475	6D	80533	IWA7091	wsnp_Ku_c4603_8305972	116.6	A	A	B	A	A	B	B	A	A	B	A	B	A	A	A	B	B	B	B	B	A	A	A	B	A	B	A	B	A	B	B	A	A	A	A	B	A	B	A	B	B	B	B	B
1476	6D	76505	IWA1741	wsnp_Ex_c13188_20825019	116.9	A	A	B	A	A	B	B	A	A	B	A	B	A	A	A	B	B	B	B	B	A	A	A	B	A	B	A	B	A	B	B	A	A	A	A	B	A	B	C	B	B	B	B	B
1477	6D	30619	IWB30619	Excalibur_rep_c113131_624	117.1	A	A	B	A	A	B	B	A	A	B	A	B	A	A	A	B	B	B	B	B	A	A	A	B	A	B	A	B	A	B	B	A	A	A	A	B	A	B	A	B	B	B	B	B
1478	6D	78162	IWA3910	wsnp_Ex_c4480_8055163	117.4	A	A	B	A	A	B	B	A	A	B	A	B	A	A	A	B	B	B	B	B	A	A	A	B	A	B	A	B	A	B	B	A	A	A	A	B	A	B	A	B	B	B	B	B
1479	6D	11495	IWB11495	BS00087343_51	117.7	A	A	B	A	A	B	B	A	A	B	A	B	A	A	A	B	B	B	B	B	A	A	A	B	A	B	A	B	A	B	B	A	A	A	A	B	A	B	A	B	B	B	B	B
1480	6D	57502	IWB57502	RAC875_c3928_422	118	A	A	B	A	A	B	B	A	A	B	A	B	A	A	A	B	B	B	B	B	A	A	A	B	A	B	A	B	A	B	B	A	A	A	A	B	A	B	C	B	B	B	B	B
1481	6D	51207	IWB51207	Ra_c16172_309	118.2	A	A	B	A	A	B	B	A	A	B	A	B	A	A	A	B	B	B	B	B	A	A	A	B	A	B	A	B	A	B	B	A	A	A	A	B	A	B	C	B	B	B	B	B
1482	6D	66694	IWB66694	Tdurum_contig10729_502	121.4	A	A	B	A	A	A	B	A	A	B	A	B	A	A	A	B	B	B	B	B	A	A	A	B	A	B	A	B	A	B	B	A	A	A	A	B	A	B	A	B	B	B	B	B
1483	6D	32150	IWB32150	GENE-0925_515	121.7	A	A	B	A	A	A	B	A	A	B	A	B	A	A	A	B	B	B	B	B	A	A	A	B	A	B	A	B	A	B	B	A	A	A	A	B	A	B	A	B	B	B	B	B
1484	6D	16198	IWB16198	D_contig24848_84	122.3	A	A	B	A	A	A	B	A	A	B	A	B	A	A	A	B	B	B	B	B	A	A	A	B	A	B	A	B	A	B	B	A	A	A	A	B	A	B	A	B	B	B	B	B
1485	7A	33906	IWB33906	GENE-4335_35	0	B	B	A	B	A	A	B	B	A	B	B	A	B	A	B	A	A	B	B	B	B	A	A	A	A	B	B	B	B	B	B	A	B	A	A	A	B	B	B	B	B	B	A	A
1486	7A	9323	IWB9323	BS00064576_51	0.3	B	B	A	B	A	A	B	B	A	B	B	A	B	A	B	A	A	B	B	B	B	A	A	A	A	B	B	B	B	B	B	A	B	A	A	A	B	B	B	B	B	B	A	A
1487	7A	11368	IWB11368	BS00084477_51	0.5	B	B	A	B	A	A	B	B	A	B	B	A	B	A	B	A	A	B	B	B	B	A	A	A	A	B	B	B	B	B	B	A	B	A	A	B	B	B	B	B	B	B	A	A
1488	7A	44621	IWB44621	Kukri_c36885_58	7.8	B	B	A	B	A	A	B	B	A	B	B	A	B	A	B	A	A	B	B	C	B	A	A	A	A	B	B	B	A	B	B	B	B	A	A	A	B	A	B	B	B	B	A	A
1489	7A	67845	IWB67845	Tdurum_contig13048_89	9.5	B	B	A	A	A	A	B	B	A	B	B	A	B	A	B	A	A	B	B	A	B	A	A	A	A	B	B	B	A	B	B	B	B	A	A	A	B	A	B	B	B	B	A	A
1490	7A	32052	IWB32052	GENE-0689_601	9.8	B	B	A	A	A	A	B	B	B	B	B	C	B	A	B	A	A	B	B	A	B	A	A	A	A	B	B	B	A	B	B	B	B	A	A	C	B	A	B	B	B	B	A	A
1491	7A	6597	IWB6597	BS00014126_51	11.8	B	C	A	A	A	A	A	B	B	B	B	A	B	A	B	B	A	B	B	A	B	A	A	A	A	B	B	A	A	B	B	B	B	A	A	A	B	A	B	B	B	B	A	A
1492	7A	10181	IWB10181	BS00067904_51	12.9	B	B	A	A	A	A	A	B	B	B	B	A	B	A	B	B	A	A	B	C	B	A	A	A	A	B	B	A	A	B	B	B	B	A	A	A	B	A	B	B	B	B	A	A
1493	7A	11150	IWB11150	BS00080831_51	13.2	B	B	A	A	A	A	A	B	B	B	B	A	B	A	B	B	A	A	B	B	B	A	A	A	A	B	B	A	A	B	B	B	B	A	A	A	B	A	B	B	B	B	A	A
1494	7A	27935	IWB27935	Excalibur_c60134_182	14.3	A	B	A	A	A	A	A	B	B	B	B	A	B	A	B	B	A	A	B	B	B	A	A	A	A	B	B	A	A	B	B	B	B	A	A	A	B	A	B	B	B	B	A	A
1495	7A	73682	IWB73682	Tdurum_contig85217_206	19.8	A	B	A	A	A	B	A	B	B	B	B	A	B	A	B	B	A	A	B	B	B	A	A	A	A	B	B	C	A	B	B	B	A	A	A	A	B	A	B	B	B	A	A	B
1496	7A	75917	IWA834	wsnp_CAP11_rep_c4066_1921894	21.8	A	B	A	A	A	B	B	B	B	B	B	A	B	A	B	B	A	A	B	B	B	A	A	A	A	B	A	A	A	B	B	B	A	A	A	A	B	A	B	B	B	A	A	A
1497	7A	44377	IWB44377	Kukri_c34887_734	22.1	A	B	A	A	B	B	B	B	B	B	B	A	B	A	B	B	A	A	B	C	C	A	A	A	A	B	A	A	A	B	B	B	A	A	A	A	B	A	B	B	B	A	A	A
1498	7A	59995	IWB59995	RAC875_c6600_716	22.4	A	B	A	A	B	B	B	B	B	B	B	A	B	A	B	B	A	A	B	B	B	A	A	A	A	B	A	A	A	B	B	B	A	A	A	A	B	A	B	B	B	A	A	A
1499	7A	10757	IWB10757	BS00074731_51	23.2	A	B	A	A	B	B	B	B	B	B	B	A	B	A	B	B	A	A	B	B	B	A	B	A	A	B	A	A	A	B	B	B	A	A	A	A	B	A	B	B	B	A	B	A
1500	7A	30960	IWB30960	Excalibur_rep_c68458_1536	24.9	A	B	A	A	B	B	B	B	B	B	B	A	B	A	B	B	A	A	B	A	B	A	B	A	A	B	A	A	A	B	B	B	A	A	A	A	B	A	B	B	B	A	B	A
1501	7A	29333	IWB29333	Excalibur_c9109_428	26.6	A	B	A	A	B	B	B	B	B	B	B	A	B	B	B	B	A	A	B	B	B	A	B	A	A	B	B	A	A	B	A	B	A	A	A	A	B	A	B	B	B	A	B	A
1502	7A	31010	IWB31010	Excalibur_rep_c68955_286	26.9	A	B	A	A	B	B	B	B	B	B	B	A	B	B	B	B	A	A	B	C	B	A	B	A	A	B	B	A	A	B	A	B	A	A	A	C	B	A	B	B	B	A	B	A
1503	7A	71609	IWB71609	Tdurum_contig45437_1667	28.6	A	B	A	A	B	B	B	B	B	B	B	A	B	B	B	B	A	A	B	A	B	A	B	A	A	B	B	A	A	B	A	B	A	A	A	A	B	A	B	B	B	A	B	A
1504	7A	9397	IWB9397	BS00064892_51	30	A	B	A	A	B	B	B	B	B	B	B	A	B	B	B	C	A	A	B	A	B	A	B	A	B	A	B	A	A	B	A	B	A	A	A	A	B	A	B	B	B	A	B	A
1505	7A	75977	IWA954	wsnp_CAP12_c3056_1439567	30.5	A	B	A	A	B	B	B	B	B	B	B	A	B	B	B	B	A	A	B	A	B	A	B	A	B	A	B	A	A	B	A	B	A	A	A	A	B	A	B	B	B	A	B	A
1506	7A	74238	IWB74238	tplb0025h15_643	30.8	A	B	A	A	B	B	B	B	B	B	B	A	B	B	B	B	A	A	B	A	B	A	B	A	B	A	B	A	A	B	A	B	A	A	A	A	B	A	B	B	B	A	B	A
1507	7A	73582	IWB73582	Tdurum_contig82572_327	32.4	A	B	A	A	B	B	A	B	B	B	B	A	B	B	B	B	A	A	B	A	B	A	B	A	B	A	B	A	A	B	A	B	A	A	A	A	B	A	B	B	B	A	B	A
1508	7A	73571	IWB73571	Tdurum_contig82438_73	34.1	A	B	A	A	B	B	A	B	B	B	B	A	A	B	B	B	A	A	B	A	C	A	B	A	B	A	B	A	A	B	A	B	A	A	A	A	B	A	B	B	B	A	B	A
1509	7A	12626	IWB12626	BS00111112_51	43.2	A	B	B	A	B	B	A	B	B	B	B	A	A	B	B	B	A	A	B	A	B	A	B	B	B	A	B	A	A	A	A	B	A	B	A	A	B	C	B	A	B	B	B	B
1510	7A	78046	IWA3760	wsnp_Ex_c41150_48040078	51.1	A	B	B	A	B	B	A	B	B	B	A	A	A	B	B	B	A	A	B	A	B	A	B	B	B	A	B	A	A	A	A	B	A	B	A	A	B	B	B	A	B	A	B	A
1511	7A	6927	IWB6927	BS00022145_51	53.9	A	B	B	A	B	B	B	B	B	B	A	A	A	B	B	B	A	A	B	A	B	A	B	B	B	A	B	A	A	A	A	B	A	B	A	A	B	B	B	A	B	A	B	A
1512	7A	11091	IWB11091	BS00079614_51	55	A	A	B	A	B	B	B	B	B	B	A	A	A	B	B	B	A	A	B	A	C	A	B	B	B	A	B	A	A	A	A	B	A	B	A	A	B	B	B	A	B	A	B	A
1513	7A	48426	IWB48426	Kukri_c96054_123	55.8	A	A	B	A	B	B	B	B	A	B	A	A	A	B	B	B	A	A	B	A	B	A	B	B	B	A	B	A	A	A	A	B	A	B	A	B	B	B	B	A	B	A	B	A
1514	7A	46670	IWB46670	Kukri_c5757_530	56.1	A	A	B	A	B	B	B	B	A	B	A	A	A	B	B	B	A	A	B	A	B	A	B	B	B	A	B	A	A	A	A	B	A	B	A	B	B	B	B	A	B	A	B	A
1515	7A	7985	IWB7985	BS00034689_51	56.6	A	A	B	A	B	B	B	B	A	B	A	A	A	B	B	B	A	A	B	A	B	A	B	B	B	A	B	A	A	A	A	B	A	B	A	B	B	B	B	A	B	A	B	A
1516	7A	12628	IWB12628	BS00111120_51	57.1	A	A	B	A	A	B	B	B	A	B	A	A	A	B	B	B	A	A	B	A	B	A	B	B	B	A	B	A	A	A	A	B	A	B	A	B	B	B	B	A	B	A	B	A
1517	7A	7104	IWB7104	BS00022475_51	57.7	A	A	B	A	A	B	B	B	A	B	A	A	A	B	B	B	A	A	B	A	B	A	B	B	B	A	B	A	A	A	A	B	A	B	A	B	B	B	B	A	B	A	B	A
1518	7A	25263	IWB25263	Excalibur_c32859_652	58.2	A	A	B	A	A	B	B	B	A	B	A	A	A	B	B	B	A	A	B	A	A	A	B	B	B	A	B	A	A	A	A	B	A	B	A	C	B	B	B	A	B	A	B	A
1519	7A	11775	IWB11775	BS00092805_51	61.5	A	A	B	A	A	B	B	B	A	B	A	A	A	B	B	B	A	A	B	A	C	A	B	B	B	B	B	A	A	A	A	A	A	B	A	B	C	B	B	A	B	A	B	A
1520	7A	10156	IWB10156	BS00067808_51	61.8	A	A	B	B	A	B	B	B	A	B	A	A	A	B	B	B	A	A	B	A	B	A	B	B	B	B	B	A	A	A	A	A	A	B	A	B	C	B	B	A	B	A	B	A
1521	7A	9633	IWB9633	BS00065789_51	62	A	A	B	A	A	B	B	B	A	B	A	A	A	B	B	B	A	A	B	A	B	A	B	B	B	B	B	A	A	A	A	A	A	B	A	B	C	B	B	A	B	A	B	A
1522	7A	75548	IWA305	wsnp_BE498209A_Ta_2_1	62.3	A	A	B	A	A	B	B	B	A	A	A	A	A	B	B	B	A	A	B	A	B	A	B	B	B	B	B	A	A	A	A	A	A	B	A	B	C	B	B	A	B	A	B	A
1523	7A	40447	IWB40447	Kukri_c108278_520	64	A	A	A	A	A	B	B	B	A	A	A	A	A	B	B	B	A	A	B	A	B	A	B	B	B	B	B	A	A	B	A	A	A	B	A	B	C	B	B	A	B	A	B	A
1524	7A	69937	IWB69937	Tdurum_contig29988_148	64.3	A	A	A	A	A	B	B	B	A	A	A	A	A	B	B	B	A	A	B	A	B	A	B	B	B	B	B	A	A	B	A	A	A	B	A	B	C	B	B	A	B	A	B	A
1525	7A	8935	IWB8935	BS00062829_51	68.1	A	B	B	A	A	B	A	B	A	A	A	A	A	B	B	B	A	A	B	A	B	A	B	B	B	A	B	A	A	B	A	A	A	B	A	A	C	B	B	A	B	A	B	A
1526	7A	3398	IWB3398	BobWhite_c44762_182	68.9	A	B	B	A	A	B	A	B	A	A	A	A	A	B	B	B	A	A	B	A	B	A	B	B	B	A	B	A	A	B	A	A	A	B	A	A	C	B	B	A	B	A	B	A
1527	7A	8256	IWB8256	BS00040992_51	69.7	A	B	B	A	A	B	A	B	A	A	A	A	A	B	B	B	A	A	B	A	B	A	B	B	B	A	B	A	A	B	A	A	A	B	A	A	C	B	B	A	B	A	B	A
1528	7A	77513	IWA3082	wsnp_Ex_c26923_36144147	70	A	B	B	A	A	B	A	B	A	A	A	A	A	B	B	B	A	A	B	A	B	A	B	B	B	A	B	A	A	B	A	A	A	B	A	A	C	B	B	A	B	A	B	B
1529	7A	23998	IWB23998	Excalibur_c2359_1511	70.2	A	B	B	A	A	B	A	B	A	A	A	A	A	B	B	B	A	A	B	A	B	A	B	B	B	A	B	A	A	B	A	A	A	B	A	A	C	B	B	A	B	A	B	B
1530	7A	63636	IWB63636	RFL_Contig1433_929	70.5	A	B	B	A	A	B	A	B	A	A	A	A	B	B	B	B	A	A	B	A	B	A	B	B	B	A	B	A	A	B	A	A	A	B	A	A	C	B	B	A	B	A	B	B
1531	7A	21330	IWB21330	Ex_c7833_486	70.8	A	B	B	A	A	B	A	B	A	A	A	A	B	B	B	B	A	A	B	A	B	A	B	B	B	A	B	A	A	B	A	A	A	B	A	A	C	B	B	A	B	A	B	B
1532	7A	8790	IWB8790	BS00059928_51	71.1	A	B	B	A	A	B	A	B	A	A	A	A	B	B	B	B	A	A	B	A	B	A	B	B	B	A	B	A	A	B	A	A	A	B	A	A	C	B	B	A	B	A	B	B
1533	7A	76717	IWA2011	wsnp_Ex_c15341_23592075	76.1	A	B	B	A	A	B	A	B	A	A	B	A	B	B	B	B	A	A	B	A	B	A	B	A	B	A	B	A	A	B	A	B	A	B	A	A	C	B	B	A	B	A	B	B
1534	7A	79767	IWA6004	wsnp_JD_c3225_4227048	76.7	A	B	B	A	A	B	A	B	A	A	B	A	B	B	B	B	A	A	B	A	B	A	B	A	B	A	B	A	A	B	A	B	A	B	A	A	C	B	B	A	B	A	B	B
1535	7A	72494	IWB72494	Tdurum_contig56175_791	77	A	B	B	A	A	B	A	B	A	A	B	A	B	B	B	B	A	A	B	A	B	A	B	A	B	A	B	A	A	B	A	B	A	B	A	A	C	C	B	A	B	A	B	B
1536	7A	9062	IWB9062	BS00063458_51	78.4	A	B	B	A	A	B	A	B	A	A	B	B	B	B	A	A	A	A	B	A	B	A	B	A	B	A	B	A	A	B	A	B	A	B	A	A	C	C	B	A	B	A	B	B
1537	7A	4764	IWB4764	BobWhite_rep_c49367_405	78.6	A	B	B	A	A	B	A	C	A	A	B	B	B	B	A	A	A	A	B	A	B	A	B	A	B	A	B	A	A	B	A	B	A	B	A	A	C	C	B	A	B	A	B	B
1538	7A	10968	IWB10968	BS00077891_51	80.3	A	B	B	A	A	B	A	B	A	A	B	B	B	B	A	A	A	A	B	A	B	A	B	A	B	A	B	A	A	A	B	B	A	B	A	A	C	C	B	A	B	A	B	B
1539	7A	42182	IWB42182	Kukri_c19696_60	81.7	A	B	B	A	A	A	A	B	A	A	B	B	B	B	A	A	A	A	B	A	B	A	B	A	B	A	B	A	A	A	B	B	A	B	A	A	C	C	B	A	B	A	B	B
1540	7A	57103	IWB57103	RAC875_c35723_106	83.1	A	B	B	A	A	A	A	B	A	A	B	B	B	B	A	A	A	A	B	A	B	A	B	A	B	A	A	A	A	C	B	B	A	B	A	A	C	C	A	A	B	A	B	B
1541	7A	75768	IWA614	wsnp_BQ160404A_Ta_1_1	83.4	A	B	B	A	A	A	A	B	A	A	B	B	B	B	A	A	A	A	B	A	B	A	B	A	B	A	A	A	A	C	B	B	A	B	A	A	C	C	A	A	B	A	B	B
1542	7A	79403	IWA5489	wsnp_Ex_rep_c68047_66792559	83.7	A	B	B	A	A	A	A	B	A	A	B	B	B	B	A	A	A	A	B	A	B	A	B	A	B	A	A	A	A	C	B	B	A	B	A	A	C	C	A	A	B	A	B	B
1543	7A	26183	IWB26183	Excalibur_c40881_182	85.4	A	B	B	A	A	A	A	B	A	A	B	B	B	B	A	A	A	A	A	A	B	A	B	A	B	A	A	A	A	A	B	B	A	B	A	A	C	C	A	A	B	A	B	B
1544	7A	10044	IWB10044	BS00067425_51	86.6	A	B	B	A	A	A	A	B	A	A	B	B	B	B	A	A	A	A	A	A	B	A	B	A	B	A	A	A	A	A	B	B	A	B	A	A	A	A	A	A	B	A	B	B
1545	7A	335	IWB335	BobWhite_c12302_368	87.1	A	B	B	A	A	A	A	B	A	A	B	B	B	B	A	A	A	A	A	A	B	A	B	A	B	A	A	A	A	C	B	B	A	B	A	A	C	C	A	A	B	A	B	B
1546	7A	79628	IWA5790	wsnp_JD_c1201_1745713	87.4	A	B	B	A	A	A	A	B	A	A	B	B	B	B	A	A	A	A	A	A	B	A	B	A	B	A	A	A	A	C	B	B	A	B	A	A	C	C	A	A	B	A	B	B
1547	7A	53267	IWB53267	RAC875_c1115_341	87.7	A	B	B	A	A	A	A	B	A	A	B	B	B	B	A	A	A	A	A	A	B	A	B	A	B	A	A	A	A	C	B	B	A	C	A	A	C	C	A	A	B	A	B	B
1548	7A	78944	IWA4910	wsnp_Ex_c9428_15641609	88.2	A	B	B	A	A	A	A	B	A	A	B	B	B	B	A	A	A	A	A	A	B	A	B	A	B	A	A	A	A	C	B	B	A	A	A	A	C	C	A	A	B	A	B	B
1549	7A	13913	IWB13913	CAP7_c2350_105	88.8	A	B	B	A	A	A	A	B	A	A	B	B	B	B	A	A	A	A	A	A	B	A	B	A	B	A	A	A	A	A	B	B	A	A	A	A	A	C	A	A	B	A	B	B
1550	7A	29518	IWB29518	Excalibur_c95707_285	89.1	A	A	B	A	A	A	A	B	A	A	B	B	B	B	A	A	A	A	A	A	B	A	B	A	B	A	A	A	A	C	B	B	A	A	A	A	A	C	A	A	B	A	B	B
1551	7A	58299	IWB58299	RAC875_c46980_148	90.5	A	A	B	A	A	A	A	B	A	A	B	B	B	B	A	A	A	A	A	A	B	A	B	A	B	A	A	C	A	B	B	B	A	A	A	C	A	B	A	A	B	A	B	B
1552	7A	45057	IWB45057	Kukri_c40735_318	95.9	A	A	B	A	A	A	A	B	A	A	B	B	B	B	A	A	A	A	A	A	B	A	B	A	B	B	C	A	A	C	A	B	A	A	A	A	A	C	C	A	A	A	B	B
1553	7A	27037	IWB27037	Excalibur_c49272_174	96.2	A	A	B	A	A	A	A	B	A	A	B	B	B	B	C	A	A	A	A	A	B	A	B	A	B	B	B	A	A	A	A	B	A	A	A	A	A	B	B	A	A	A	B	B
1554	7A	45565	IWB45565	Kukri_c45763_319	99.8	A	A	A	A	A	A	A	B	A	A	B	B	B	B	C	A	A	A	A	B	B	A	B	A	B	B	C	A	A	A	A	B	A	A	A	A	A	B	C	A	A	A	B	B
1555	7A	78598	IWA4483	wsnp_Ex_c6354_11053460	100.9	A	A	A	A	A	A	A	B	A	A	B	B	A	B	C	A	A	A	A	B	B	A	B	A	B	B	C	A	A	B	A	B	A	A	A	A	A	B	C	A	A	A	B	B
1556	7A	70291	IWB70291	Tdurum_contig31699_276	106.6	B	A	A	A	A	A	A	B	A	A	B	B	A	A	A	A	A	A	A	B	B	A	B	A	B	B	A	A	A	C	A	B	A	A	B	A	A	C	B	A	A	B	B	B
1557	7A	12038	IWB12038	BS00098482_51	108	B	A	A	A	A	A	A	B	A	B	B	B	A	A	A	A	A	A	A	B	B	A	B	A	B	B	A	A	A	C	A	B	A	A	B	B	B	A	B	A	A	B	B	B
1558	7A	80144	IWA6576	wsnp_Ku_c16022_24798741	128.5	B	A	A	B	A	B	B	B	B	B	A	A	B	A	B	B	A	B	A	B	B	A	B	A	B	A	A	A	A	B	A	B	B	A	A	B	A	A	B	A	A	B	B	B
1559	7A	10682	IWB10682	BS00073644_51	129.9	A	A	A	B	A	B	B	B	B	B	A	A	B	B	B	B	A	B	A	B	B	A	B	A	B	A	A	A	A	B	A	B	B	A	A	B	A	A	B	B	A	B	B	B
1560	7A	8841	IWB8841	BS00061593_51	130.5	A	A	A	B	A	B	A	B	B	B	A	A	B	B	B	B	A	B	A	B	B	A	B	A	B	A	A	A	A	B	A	B	B	A	A	B	A	A	B	B	A	B	B	B
1561	7A	9244	IWB9244	BS00064302_51	130.7	A	A	A	B	A	B	A	B	B	B	A	A	B	B	B	B	A	B	A	B	B	A	C	A	B	A	A	A	A	B	A	B	B	A	A	B	A	A	B	B	A	B	B	B
1562	7A	6132	IWB6132	BS00009886_51	131	A	A	A	B	A	B	A	B	B	B	A	A	B	B	B	B	A	B	A	B	B	A	B	A	B	A	A	A	A	B	A	B	B	A	A	B	A	A	B	B	A	B	B	B
1563	7A	41099	IWB41099	Kukri_c13821_1990	131.5	A	A	A	B	A	B	A	B	B	B	A	A	B	B	B	B	A	B	A	B	B	A	B	A	B	A	A	A	A	B	A	B	B	A	A	B	A	B	B	B	A	B	B	B
1564	7B	72316	IWB72316	Tdurum_contig5352_556	0	A	A	B	B	A	B	B	B	A	A	A	B	A	B	B	A	B	A	B	A	B	B	B	A	B	B	B	A	A	A	B	B	A	B	B	B	B	B	A	B	B	A	A	A
1565	7B	70085	IWB70085	Tdurum_contig30677_55	2	A	A	B	B	A	B	C	B	A	A	A	B	C	B	B	A	B	A	B	A	B	B	B	A	B	B	B	A	A	A	B	B	A	B	C	B	B	B	A	B	B	A	A	A
1566	7B	57207	IWB57207	RAC875_c36670_72	2.3	A	A	B	B	A	B	C	B	A	A	A	B	A	B	B	A	B	A	B	A	B	B	B	A	B	B	B	A	A	A	B	B	A	B	C	B	B	B	A	B	B	A	A	A
1567	7B	34191	IWB34191	GENE-4833_102	8.5	A	C	B	B	A	B	B	B	B	A	A	A	C	B	B	B	B	A	B	A	B	A	B	A	B	B	B	A	A	A	B	B	A	B	C	A	B	B	B	B	B	A	A	B
1568	7B	35038	IWB35038	IAAV5530	9.6	A	C	B	B	A	B	B	B	B	A	A	A	C	B	B	B	B	A	B	A	B	A	B	A	B	B	B	A	A	A	B	B	A	B	C	A	B	B	B	B	B	A	A	B
1569	7B	76102	IWA1220	wsnp_CAP8_rep_c3687_1819173	11.4	B	C	B	B	A	B	B	B	B	A	A	A	A	B	B	B	A	A	B	A	B	A	B	A	B	B	B	A	A	A	B	B	A	B	A	A	B	B	B	A	B	A	A	B
1570	7B	26212	IWB26212	Excalibur_c41298_459	11.6	B	C	B	B	A	B	B	B	B	A	A	A	A	B	B	B	A	A	B	A	B	A	B	A	B	B	B	A	A	A	B	B	A	B	A	A	B	B	B	A	B	A	A	B
1571	7B	12630	IWB12630	BS00111144_51	11.9	B	C	B	B	A	B	B	B	B	A	A	A	A	B	B	B	A	A	B	A	B	A	B	A	B	B	B	A	A	C	B	B	A	B	A	A	B	B	B	A	B	A	A	B
1572	7B	35941	IWB35941	IACX3991	13.3	B	C	B	B	A	B	B	B	B	A	A	A	A	B	B	B	A	A	B	A	C	A	B	A	B	B	B	A	A	A	B	B	A	B	A	A	B	B	B	A	B	A	A	B
1573	7B	53146	IWB53146	RAC875_c10672_440	14.4	B	C	B	B	A	B	B	B	B	A	A	A	B	B	B	B	A	A	B	A	C	A	B	A	B	B	B	B	A	A	B	B	A	B	A	A	B	B	B	A	B	A	A	B
1574	7B	36633	IWB36633	Jagger_c5321_98	14.7	B	C	B	B	A	B	B	B	B	A	A	A	B	B	B	B	A	A	B	A	B	A	B	A	B	B	B	B	A	A	B	B	A	B	A	A	B	B	B	A	B	A	A	B
1575	7B	26490	IWB26490	Excalibur_c43793_81	15	B	A	B	B	A	B	B	B	B	A	A	A	B	B	B	B	A	A	B	A	B	A	B	A	B	B	B	B	A	A	B	B	A	B	A	A	B	B	B	A	B	A	A	B
1576	7B	40119	IWB40119	Ku_c884_2297	15.3	B	C	B	B	A	B	B	B	B	A	A	A	B	B	B	B	A	A	B	A	B	A	B	A	B	B	B	B	A	A	B	B	A	B	A	A	B	B	B	A	B	A	A	B
1577	7B	72575	IWB72575	Tdurum_contig57370_318	15.5	B	C	B	B	A	B	B	B	B	A	A	A	B	B	B	B	A	A	B	A	B	A	B	A	B	B	B	B	A	A	B	B	A	B	A	A	B	B	B	A	B	A	A	B
1578	7B	44542	IWB44542	Kukri_c36225_133	15.8	B	B	B	B	A	B	B	B	B	A	A	A	B	B	B	B	A	A	B	A	B	A	B	A	B	B	B	B	A	A	B	B	A	B	A	A	B	B	B	A	B	A	A	B
1579	7B	35528	IWB35528	IAAV872	16.4	B	C	B	B	A	B	B	B	B	A	A	A	B	B	B	B	A	A	B	A	B	A	B	A	B	B	B	B	A	A	B	B	A	B	A	A	B	B	B	A	B	A	A	B
1580	7B	1369	IWB1369	BobWhite_c20266_115	16.6	B	C	B	C	A	B	B	B	B	A	A	C	B	B	B	B	A	A	B	A	B	A	B	A	B	B	B	B	A	A	B	B	A	B	B	A	B	B	B	A	B	A	A	B
1581	7B	5875	IWB5875	BS00003726_51	16.9	B	C	B	C	A	B	B	B	B	A	A	C	B	B	B	B	A	A	B	A	B	A	B	A	B	B	B	B	A	A	B	B	A	B	B	A	B	B	B	A	B	A	A	B
1582	7B	36566	IWB36566	Jagger_c3811_65	17.2	B	C	B	C	A	B	B	B	B	A	A	C	B	B	B	B	A	A	B	A	B	A	B	A	B	B	B	B	A	A	B	B	A	B	B	A	B	B	B	A	B	A	A	B
1583	7B	34211	IWB34211	GENE-4869_117	17.8	B	C	B	A	A	B	B	B	B	A	A	C	B	B	B	B	A	A	B	A	B	A	B	A	B	B	B	B	A	A	B	B	A	B	B	A	B	B	B	A	B	A	A	B
1584	7B	65376	IWB65376	TA001320-0384	18.9	B	C	B	C	A	B	B	B	B	A	A	C	B	B	B	B	A	A	B	A	B	A	B	A	B	B	B	B	A	A	B	B	A	B	B	A	B	B	B	A	B	A	A	B
1585	7B	11385	IWB11385	BS00084788_51	19.2	B	C	B	C	A	B	B	B	B	A	A	C	B	B	B	B	A	A	B	A	B	A	B	A	B	B	B	B	A	A	B	B	A	B	B	A	B	B	B	A	B	A	A	B
1586	7B	5739	IWB5739	BS00000170_51	21.8	B	A	B	A	A	B	B	B	B	A	A	A	B	B	B	A	A	B	B	A	B	A	B	A	B	B	B	B	A	A	B	B	A	B	B	A	A	B	B	A	B	B	A	B
1587	7B	12657	IWB12657	CAP11_c106_97	23.5	B	C	B	C	A	B	B	B	B	A	A	C	B	B	B	A	A	B	B	A	B	A	B	A	B	B	B	B	A	A	B	B	A	B	B	A	A	B	B	A	B	B	A	B
1588	7B	78920	IWA4873	wsnp_Ex_c908_1754208	24.1	B	C	B	C	A	B	B	B	B	A	A	C	B	B	B	A	A	B	B	A	C	A	B	A	B	B	B	B	A	A	B	B	A	B	B	A	A	B	B	A	B	B	A	B
1589	7B	3531	IWB3531	BobWhite_c46772_564	24.6	B	C	B	C	A	B	B	B	B	A	A	C	B	B	B	A	A	B	B	B	B	A	B	A	B	B	B	B	A	A	B	B	A	B	B	A	A	B	B	A	B	B	A	B
1590	7B	54284	IWB54284	RAC875_c1638_165	24.9	B	C	B	C	A	B	B	B	B	A	A	C	B	B	B	A	A	B	B	B	B	A	B	A	B	B	B	B	A	A	B	B	A	B	B	A	A	B	B	A	B	B	A	C
1591	7B	63589	IWB63589	RFL_Contig124_558	25.7	B	C	B	C	A	B	A	B	B	A	A	C	B	B	B	A	A	B	B	B	B	A	B	A	B	B	B	B	A	A	B	B	A	B	B	A	A	B	B	A	B	B	A	B
1592	7B	69576	IWB69576	Tdurum_contig28644_281	26.6	B	C	B	C	A	B	A	B	B	A	A	B	B	B	B	A	A	B	B	B	B	A	B	A	B	B	B	B	A	A	B	B	A	B	B	A	A	B	B	A	B	B	A	B
1593	7B	76344	IWA1543	wsnp_Ex_c11860_19030807	27.4	B	C	B	C	A	B	A	B	B	A	A	B	B	B	B	A	A	B	B	B	B	A	B	A	B	B	B	B	A	A	B	B	A	B	B	A	A	B	B	A	B	B	A	B
1594	7B	34169	IWB34169	GENE-4790_279	29.4	B	C	B	C	A	B	A	B	B	A	A	B	B	B	B	A	A	B	B	B	B	A	B	A	B	B	B	B	A	A	B	B	A	A	B	A	A	B	B	A	B	B	A	B
1595	7B	33246	IWB33246	GENE-3132_118	29.7	B	C	B	C	A	B	A	B	B	A	A	B	B	B	B	A	A	B	B	B	B	A	B	A	B	B	B	B	A	A	B	B	A	A	B	A	A	B	B	A	B	B	A	B
1596	7B	26171	IWB26171	Excalibur_c40829_188	34.2	B	C	B	A	A	B	A	B	B	A	A	B	B	A	B	C	A	B	B	B	A	A	B	A	B	A	B	B	A	A	B	B	A	B	B	A	A	B	B	A	B	A	A	B
1597	7B	72925	IWB72925	Tdurum_contig62981_75	35.6	B	C	B	A	A	B	A	B	B	B	A	B	B	A	B	B	A	B	B	B	A	A	B	A	B	A	B	B	A	A	B	B	A	B	B	A	A	B	B	A	B	A	A	B
1598	7B	70349	IWB70349	Tdurum_contig32378_439	40.4	B	C	B	A	A	B	B	B	B	B	A	B	B	A	B	B	B	B	B	B	A	A	B	A	B	A	B	B	A	A	B	B	A	A	B	B	B	B	A	B	B	A	B	B
1599	7B	60292	IWB60292	RAC875_c7123_1703	42	B	B	B	A	A	B	B	B	B	B	A	B	B	A	B	B	B	B	B	B	A	A	B	A	B	A	B	B	A	A	B	B	A	A	B	A	B	B	A	B	B	A	B	B
1600	7B	27833	IWB27833	Excalibur_c58742_144	42.6	B	B	B	A	A	B	B	B	B	B	A	B	B	A	B	B	B	B	B	B	A	A	B	A	B	A	B	B	A	A	B	B	A	A	B	A	B	B	A	B	B	A	B	B
1601	7B	66025	IWB66025	TA005844-0160	42.8	B	B	B	A	A	B	B	B	B	B	A	B	B	A	B	B	B	B	B	B	A	A	B	A	B	A	B	B	A	A	B	B	A	A	B	A	B	B	A	B	B	A	B	B
1602	7B	65673	IWB65673	TA003316-1486	43.6	B	B	B	A	A	B	B	B	B	B	A	B	B	A	B	B	B	B	B	B	A	A	B	A	B	A	B	B	A	A	B	B	A	A	B	A	B	B	A	B	B	A	B	B
1603	7B	55600	IWB55600	RAC875_c24101_284	45.6	B	B	B	A	A	B	B	B	B	B	A	B	B	A	B	B	B	B	B	B	A	A	B	A	B	A	C	B	A	A	B	B	A	A	B	A	B	B	A	B	B	A	B	B
1604	7B	9018	IWB9018	BS00063208_51	46.5	B	B	B	A	A	B	B	B	B	B	A	B	B	A	B	B	B	B	B	B	A	A	B	A	B	A	B	B	A	A	B	B	A	A	B	A	B	B	A	B	B	A	B	B
1605	7B	7711	IWB7711	BS00029287_51	47.8	B	B	B	A	A	B	B	B	B	A	A	B	B	A	B	B	B	B	B	B	A	A	B	A	B	A	B	B	A	A	B	B	A	A	B	A	B	B	A	B	B	A	B	B
1606	7B	74015	IWB74015	Tdurum_contig97814_355	48.7	B	B	B	A	A	B	B	B	B	A	A	B	B	A	B	B	B	B	B	B	B	A	B	A	B	A	B	B	A	A	B	B	A	A	B	A	B	B	A	B	B	A	B	B
1607	7B	80152	IWA6589	wsnp_Ku_c16295_25149034	50.4	B	B	B	A	A	B	B	B	B	A	A	A	B	A	B	B	B	B	B	B	B	A	B	A	B	A	C	B	A	A	B	C	A	A	B	A	B	B	A	B	B	A	B	B
1608	7B	73542	IWB73542	Tdurum_contig81911_179	51	B	B	B	A	A	B	B	B	B	A	A	A	B	A	B	B	B	B	B	B	B	A	B	A	B	A	A	B	A	A	B	A	A	A	B	A	B	B	A	B	B	A	B	B
1609	7B	58468	IWB58468	RAC875_c48766_224	51.3	B	B	B	A	A	B	B	B	B	A	A	A	B	A	B	B	B	B	B	B	B	A	B	A	B	A	C	B	A	A	B	C	A	A	B	A	B	B	A	B	B	A	B	B
1610	7B	69489	IWB69489	Tdurum_contig28304_335	54.8	B	B	B	A	A	B	B	B	B	A	B	B	B	A	B	B	B	B	B	B	B	A	B	A	B	A	B	B	A	A	B	C	A	A	B	A	C	B	A	B	B	A	B	B
1611	7B	69481	IWB69481	Tdurum_contig28276_849	55.6	B	B	B	A	A	B	B	B	B	A	B	B	B	A	B	B	B	B	B	B	B	A	B	A	B	A	B	B	A	A	B	C	A	A	B	A	C	B	A	B	B	A	B	B
1612	7B	70061	IWB70061	Tdurum_contig30580_219	57	B	B	B	A	A	B	B	B	B	A	B	B	B	A	B	B	B	B	B	B	B	A	B	A	B	A	B	B	B	A	B	C	A	A	B	A	C	B	A	B	B	A	B	B
1613	7B	40527	IWB40527	Kukri_c11141_203	57.8	B	B	B	A	A	B	B	B	B	A	B	B	B	A	B	B	B	B	B	B	B	A	B	A	B	A	B	B	B	A	B	C	A	A	B	A	C	B	A	B	B	A	B	B
1614	7B	41484	IWB41484	Kukri_c15912_812	58.1	B	B	B	A	A	B	B	B	B	A	B	B	B	A	B	B	B	B	B	B	B	A	B	A	B	A	B	C	B	A	B	C	A	A	B	A	C	B	A	B	B	C	B	B
1615	7B	9261	IWB9261	BS00064367_51	58.7	B	B	B	A	A	B	B	B	B	A	B	B	B	A	B	C	B	B	B	B	B	A	B	A	B	A	B	B	B	A	B	A	A	A	B	A	A	B	A	B	B	A	B	B
1616	7B	35490	IWB35490	IAAV8521	58.9	B	B	B	A	A	B	B	B	B	A	B	B	B	A	B	B	B	B	B	B	B	A	B	A	B	A	B	B	B	A	B	C	A	A	B	A	C	B	A	B	B	A	B	B
1617	7B	25127	IWB25127	Excalibur_c31707_302	59.8	B	B	B	A	A	B	B	B	B	A	B	B	B	A	B	B	B	B	B	B	B	A	B	A	B	A	B	B	B	A	B	C	A	A	B	A	C	B	A	B	B	A	B	B
1618	7B	8451	IWB8451	BS00047083_51	60.3	B	B	B	A	A	B	B	B	B	A	B	B	B	A	B	B	B	B	B	B	B	A	B	A	B	A	B	B	A	A	B	C	A	A	B	A	A	B	A	B	B	A	B	B
1619	7B	71692	IWB71692	Tdurum_contig4658_418	60.6	B	B	B	A	A	B	B	B	B	A	B	B	B	A	B	B	B	B	B	B	B	A	B	A	B	A	B	B	A	A	B	C	A	A	B	A	C	B	A	B	B	A	B	B
1620	7B	9373	IWB9373	BS00064808_51	60.9	B	B	B	A	A	B	B	B	B	A	B	B	B	A	B	B	B	B	B	B	B	A	B	A	B	A	B	B	A	B	B	B	A	A	B	A	B	B	A	B	B	A	B	B
1621	7B	39661	IWB39661	Ku_c5789_663	61.4	B	B	B	A	A	B	B	B	B	A	B	B	B	A	B	B	B	B	B	B	B	A	B	A	B	A	B	B	A	B	B	C	B	A	B	A	C	B	A	B	B	A	B	B
1622	7B	23527	IWB23527	Excalibur_c2062_383	63.1	B	B	B	A	A	B	B	B	B	A	B	B	B	B	B	B	B	B	B	B	B	A	A	A	B	A	B	B	A	B	B	A	B	A	B	A	C	B	A	B	B	A	B	B
1623	7B	54048	IWB54048	RAC875_c15057_1050	63.4	B	B	B	A	A	B	B	B	B	A	B	B	B	B	B	B	B	B	B	B	B	A	A	A	B	A	B	B	A	B	B	A	B	A	B	A	C	B	A	B	B	A	B	B
1624	7B	726	IWB726	BobWhite_c14966_231	63.9	B	B	B	A	A	C	B	B	B	A	B	B	B	B	B	B	B	B	B	B	B	A	A	A	B	B	B	B	A	B	B	A	B	A	B	A	C	B	A	B	B	A	B	B
1625	7B	79926	IWA6246	wsnp_JD_rep_c48755_32989025	67.8	B	B	B	A	B	B	A	B	B	A	B	B	B	B	A	B	B	B	B	B	B	A	A	A	B	B	B	B	A	B	B	A	B	A	C	A	C	B	A	B	B	A	B	B
1626	7B	72479	IWB72479	Tdurum_contig55961_526	68.4	B	B	B	A	B	B	A	B	B	A	B	B	B	B	A	B	B	B	B	B	B	A	A	A	B	B	B	B	A	B	B	A	B	A	C	A	C	B	A	B	B	A	B	B
1627	7B	52637	IWB52637	Ra_c74686_615	68.9	B	B	B	A	B	B	A	B	B	A	B	B	B	B	A	B	B	B	B	B	B	A	A	A	B	B	B	B	A	B	B	A	B	A	B	A	B	B	A	B	B	A	B	B
1628	7B	68676	IWB68676	Tdurum_contig17697_671	69.2	B	B	B	A	B	B	A	B	B	A	B	B	B	B	B	B	B	B	B	B	B	A	A	A	B	B	B	B	A	B	B	A	B	A	B	A	C	B	A	B	B	A	B	B
1629	7B	6594	IWB6594	BS00013985_51	69.5	B	B	B	A	B	B	A	B	B	A	B	B	B	B	A	B	B	B	B	B	B	A	A	A	B	B	B	B	A	B	B	A	B	A	B	A	C	B	A	B	B	A	B	B
1630	7B	40712	IWB40712	Kukri_c11959_587	70	B	B	B	A	B	B	A	B	B	A	B	B	B	B	A	B	B	B	B	B	B	A	A	A	B	B	B	B	A	C	B	A	B	A	C	A	C	B	A	B	B	A	B	B
1631	7B	6544	IWB6544	BS00012264_51	70.3	B	B	B	A	B	B	A	B	B	A	B	B	B	B	A	B	B	B	B	B	B	A	A	A	B	B	B	B	A	B	B	A	B	A	C	A	C	B	A	B	B	A	B	B
1632	7B	34699	IWB34699	IAAV3313	70.8	B	B	B	A	B	B	A	B	B	A	B	B	B	B	A	B	B	B	B	B	B	A	A	A	B	B	B	B	A	B	B	A	B	A	C	A	C	B	A	B	B	A	B	B
1633	7B	63121	IWB63121	RAC875_rep_c78007_394	71.1	B	B	B	A	B	B	A	B	B	A	B	B	B	B	A	B	B	B	B	B	B	A	A	A	B	B	B	B	A	B	B	A	B	A	C	A	C	B	A	B	B	A	B	B
1634	7B	45187	IWB45187	Kukri_c42052_491	72.5	B	B	B	A	B	B	A	B	B	A	B	B	B	B	B	B	B	B	B	B	B	A	A	A	B	B	B	B	A	B	B	A	B	A	C	A	C	B	A	B	B	A	B	B
1635	7B	40181	IWB40181	Ku_c9679_441	72.8	B	B	B	A	B	B	A	B	B	A	B	B	B	B	B	B	B	B	B	B	B	A	A	A	B	B	B	B	A	B	B	A	B	A	C	A	C	B	A	B	B	A	B	B
1636	7B	64121	IWB64121	RFL_Contig2905_931	73.1	B	B	B	A	B	B	A	B	B	A	B	B	B	B	B	B	B	B	B	B	B	A	A	A	B	B	B	B	A	B	B	A	B	A	C	A	C	B	A	B	B	A	B	B
1637	7B	10912	IWB10912	BS00077049_51	73.3	B	B	B	A	B	B	A	B	B	A	B	B	B	B	B	B	B	B	B	B	B	A	A	A	B	B	B	B	A	B	B	A	B	A	C	A	C	B	A	B	B	A	B	B
1638	7B	5626	IWB5626	BobWhite_rep_c66883_80	73.6	B	B	B	A	B	B	A	B	B	A	B	B	B	B	B	B	B	B	B	B	B	A	A	A	B	B	B	B	A	B	B	A	B	A	C	A	C	B	A	B	B	A	B	B
1639	7B	5034	IWB5034	BobWhite_rep_c53128_119	73.9	B	B	B	A	B	B	A	B	B	A	B	B	B	B	B	B	B	B	B	B	B	A	A	A	B	B	B	B	A	B	B	A	B	A	B	A	B	B	A	B	B	A	B	C
1640	7B	38836	IWB38836	Ku_c22990_969	74.2	B	B	B	A	B	B	A	B	B	A	B	B	B	B	B	B	B	B	B	B	B	A	A	A	B	B	B	B	A	B	B	A	B	A	C	A	C	B	A	B	B	A	B	B
1641	7B	22760	IWB22760	Excalibur_c16245_840	74.4	B	B	B	A	B	B	A	B	B	A	B	B	B	B	B	B	B	B	B	B	B	A	A	A	B	B	B	B	A	B	B	A	B	A	C	A	C	B	A	B	B	A	B	B
1642	7B	22759	IWB22759	Excalibur_c16245_801	74.7	B	B	B	A	B	B	A	B	B	A	B	B	B	B	B	B	B	B	B	B	B	A	A	A	B	B	B	B	A	C	B	A	B	A	C	A	C	B	A	B	B	A	B	B
1643	7B	49105	IWB49105	Kukri_rep_c105704_342	75	B	B	B	A	B	B	A	B	B	A	B	B	B	B	B	B	B	B	B	B	B	A	A	A	B	B	B	B	A	C	B	A	B	A	C	A	C	B	A	B	B	A	B	B
1644	7B	5370	IWB5370	BobWhite_rep_c63346_248	75.3	B	B	B	A	B	B	A	B	B	A	B	B	B	B	B	B	B	B	B	B	B	A	A	A	B	B	B	B	A	C	B	A	B	A	C	A	C	B	A	B	B	A	B	B
1645	7B	34000	IWB34000	GENE-4528_511	76.2	B	B	B	A	B	B	A	B	B	A	B	B	B	B	B	B	B	B	B	B	B	A	A	A	B	B	B	A	A	B	B	A	B	A	A	A	C	B	A	B	B	A	B	A
1646	7B	9367	IWB9367	BS00064783_51	77	B	B	B	A	B	B	A	B	B	A	B	B	B	B	B	B	B	B	B	B	B	A	A	A	B	B	B	B	A	B	B	A	B	A	C	A	C	B	A	B	B	A	B	B
1647	7B	25689	IWB25689	Excalibur_c36221_1031	77.6	A	B	B	A	B	C	A	B	B	A	B	B	B	B	B	B	B	B	B	B	B	C	A	A	B	B	B	B	A	B	B	A	B	A	C	A	C	B	A	B	B	A	B	B
1648	7B	8868	IWB8868	BS00062611_51	77.9	A	B	B	A	B	A	A	B	B	A	B	B	B	B	B	B	B	B	B	B	B	A	A	A	B	B	B	B	A	B	B	A	B	A	A	A	B	B	A	B	B	A	B	B
1649	7B	69562	IWB69562	Tdurum_contig28598_245	79.3	A	B	B	A	B	A	A	B	B	A	B	B	B	B	B	B	B	B	B	B	B	A	A	A	B	B	B	B	A	B	B	A	B	A	C	A	B	B	A	B	B	A	B	B
1650	7B	2238	IWB2238	BobWhite_c2892_167	79.5	A	B	B	A	B	A	A	B	B	A	B	B	B	B	B	B	B	B	B	A	B	A	A	A	B	B	B	B	A	B	B	A	B	A	C	A	B	B	A	B	B	A	B	B
1651	7B	77980	IWA3675	wsnp_Ex_c3930_7127883	80.1	A	B	B	A	B	A	A	B	B	A	B	B	B	B	B	B	B	B	B	A	B	A	A	A	B	B	B	B	A	B	B	A	B	A	C	A	B	B	A	B	B	A	B	B
1652	7B	7512	IWB7512	BS00023884_51	85.7	A	B	A	B	B	A	A	B	B	B	B	B	B	B	B	B	B	A	B	A	B	A	A	A	B	B	C	B	A	B	B	A	B	A	C	A	A	B	A	B	B	A	B	B
1653	7B	21792	IWB21792	Excalibur_c11062_582	87.1	A	B	A	B	B	A	A	B	B	B	B	B	B	B	B	B	B	A	B	A	B	A	A	A	B	B	A	B	A	B	B	B	B	A	A	A	B	B	A	B	B	A	B	B
1654	7D	56616	IWB56616	RAC875_c31483_117	0	B	B	B	B	A	B	B	A	A	B	A	B	B	B	B	A	B	A	A	B	B	A	A	B	A	A	B	A	B	B	B	B	B	A	A	B	B	A	B	A	A	A	A	A
1655	7D	15481	IWB15481	D_contig08599_465	0.3	B	B	B	B	A	B	B	A	A	B	A	B	B	B	B	A	B	A	A	B	B	A	A	B	A	A	B	A	B	B	B	B	B	A	A	B	B	A	B	A	A	A	A	A
1656	7D	9595	IWB9595	BS00065623_51	3.2	B	B	B	B	A	B	B	A	A	B	A	B	B	B	B	A	B	A	A	B	B	A	A	B	A	A	B	A	B	B	B	B	B	A	A	B	B	A	B	A	A	A	A	A
1657	7D	45523	IWB45523	Kukri_c45368_300	3.7	B	B	B	B	A	B	B	B	A	B	A	B	B	B	B	A	B	A	A	B	B	A	A	B	A	A	B	A	B	B	B	B	B	A	A	B	B	A	B	A	A	A	A	A
1658	7D	47867	IWB47867	Kukri_c80931_147	4	B	B	B	B	A	B	B	B	A	B	A	B	B	B	B	A	B	A	A	B	B	A	A	B	A	A	B	A	B	B	B	B	B	A	A	B	B	A	B	A	A	A	A	A
1659	7D	55455	IWB55455	RAC875_c23140_909	4.6	B	B	B	B	A	B	B	B	A	B	A	B	B	B	B	A	B	A	A	B	B	A	A	B	A	A	B	A	B	B	B	B	B	A	A	B	B	A	B	A	A	A	A	A
1660	7D	340	IWB340	BobWhite_c1234_238	7.9	B	B	B	B	A	B	B	B	A	B	A	B	B	B	B	A	B	A	A	C	C	A	A	B	A	A	B	A	B	B	B	A	B	A	A	B	B	A	B	A	A	A	A	A
1661	7D	80807	IWA7455	wsnp_Ku_rep_c69533_68919669	8.2	B	B	B	B	A	B	B	B	A	B	A	B	B	B	B	A	B	A	A	B	B	A	A	B	A	A	B	A	B	B	B	A	B	A	A	B	B	A	B	A	A	A	A	A
1662	7D	12476	IWB12476	BS00110124_51	9	B	B	B	B	C	B	B	B	A	B	A	B	B	B	B	A	B	A	A	B	B	A	A	B	A	A	B	A	B	B	B	A	B	A	A	B	B	A	B	A	A	A	A	A
1663	7D	33244	IWB33244	GENE-3129_828	9.3	B	B	B	B	C	B	B	B	A	B	A	B	B	B	B	A	B	A	A	B	B	A	A	B	A	A	B	A	B	B	B	A	B	A	A	C	B	A	B	A	A	A	A	A
1664	7D	17005	IWB17005	D_contig65480_176	17	B	B	B	B	B	B	B	A	A	B	A	B	B	B	A	A	B	A	A	B	B	A	A	B	A	A	B	A	B	B	B	B	B	A	A	B	B	A	B	A	A	A	A	A
1665	7D	4505	IWB4505	BobWhite_c8680_453	17.5	B	B	B	B	B	B	B	A	A	B	A	B	B	B	A	A	B	A	A	B	B	A	A	B	A	A	B	A	B	B	B	B	B	A	A	B	B	A	B	A	A	A	A	A
1666	7D	15569	IWB15569	D_contig10382_335	19.5	B	B	B	C	B	B	B	A	A	B	A	B	B	B	A	A	B	A	A	B	B	A	A	B	A	A	B	A	B	B	A	A	B	A	A	B	B	A	B	B	A	A	A	A
1667	7D	55830	IWB55830	RAC875_c25695_316	19.8	B	B	B	C	B	B	B	A	A	B	A	B	B	B	A	A	B	A	A	C	B	A	A	B	A	A	B	A	B	B	A	A	B	A	A	B	B	A	B	B	A	A	A	A
1668	7D	17232	IWB17232	D_contig80193_238	25	B	A	B	C	B	B	B	A	A	B	A	B	B	B	A	A	B	A	A	B	B	A	A	B	A	A	B	A	B	B	A	A	B	A	A	B	B	A	B	B	A	A	A	A
1669	7D	17538	IWB17538	D_F5XZDLF01CQM1B_324	38.5	B	A	B	B	A	B	B	A	A	B	B	B	B	B	A	A	A	A	B	B	A	A	A	B	A	A	B	C	B	B	B	B	B	A	A	B	A	A	B	B	A	A	A	B
1670	7D	18267	IWB18267	D_GBB4FNX02GS9OS_101	39.6	B	A	B	B	A	B	B	A	A	B	B	B	B	B	A	A	A	A	B	B	A	A	A	B	A	A	B	A	B	B	B	B	B	A	A	B	A	A	B	B	A	A	A	B
1671	7D	15280	IWB15280	D_contig03850_135	41.6	B	A	B	B	A	A	B	B	A	B	A	B	B	A	A	A	A	A	B	B	A	A	A	B	A	A	B	A	B	B	B	B	B	A	A	B	A	A	B	B	A	A	A	B
1672	7D	16984	IWB16984	D_contig63536_65	42.4	B	A	B	B	A	A	B	B	A	B	A	B	B	A	A	A	A	A	B	B	A	A	A	B	A	B	B	A	B	B	B	B	B	A	A	B	A	A	B	B	A	A	A	B
1673	7D	74167	IWB74167	tplb0024a09_919	43	B	A	B	B	A	A	B	B	A	B	A	B	B	A	A	A	A	A	B	C	A	A	A	B	A	B	B	A	B	B	B	B	B	A	A	B	A	A	B	B	A	A	A	B
1674	7D	27288	IWB27288	Excalibur_c52102_630	44.1	B	A	B	B	A	A	B	B	A	B	A	B	B	A	A	A	A	A	B	B	A	A	A	B	A	B	B	A	B	B	B	B	B	A	A	A	B	A	B	B	A	A	A	B
1675	7D	41108	IWB41108	Kukri_c13845_424	47.9	B	A	B	A	A	A	B	B	A	B	B	A	B	A	A	A	A	A	B	B	A	A	A	B	C	B	A	B	B	B	B	B	B	A	A	A	B	A	B	B	A	A	A	B
1676	7D	48288	IWB48288	Kukri_c92151_216	49.6	B	A	B	A	A	A	B	B	A	B	B	A	B	A	A	A	A	A	B	B	A	A	A	B	C	B	A	B	B	B	B	B	B	A	A	A	B	A	B	B	A	A	A	B
1677	7D	72087	IWB72087	Tdurum_contig50560_1407	49.8	B	A	B	A	A	A	B	B	A	B	B	A	B	A	A	A	A	A	B	B	C	A	A	B	C	B	A	B	B	B	B	B	B	A	A	A	B	A	B	B	A	A	A	B
1678	7D	16798	IWB16798	D_contig45163_68	51.5	B	A	B	A	A	A	B	B	A	B	B	A	B	A	A	A	A	A	B	A	A	A	A	B	C	B	A	B	B	B	B	B	B	A	A	A	B	A	B	B	A	A	A	B
1679	7D	18577	IWB18577	D_GBUVHFX01BEHL1_132	52.9	B	A	B	A	A	A	B	B	A	B	B	A	B	A	A	A	A	A	B	A	A	A	A	B	C	A	A	B	B	B	B	A	B	A	A	A	B	A	B	B	A	A	A	B
1680	7D	16986	IWB16986	D_contig63719_554	53.5	B	A	B	A	A	A	B	B	A	B	B	A	B	A	A	A	A	A	B	A	C	A	A	B	A	A	A	B	B	B	B	A	B	A	A	A	B	A	B	B	A	A	A	B
1681	7D	16460	IWB16460	D_contig30716_172	54.1	B	A	B	A	A	A	B	B	C	B	B	A	B	A	A	A	A	A	B	A	A	A	A	B	A	A	A	B	B	B	B	A	B	A	A	A	B	A	B	B	A	A	A	B
1682	7D	17042	IWB17042	D_contig67456_197	55.3	B	A	B	A	A	B	B	B	A	A	B	A	B	A	A	A	A	A	B	A	A	A	A	B	A	A	A	B	B	B	B	A	B	A	A	A	B	A	B	B	A	A	A	B
1683	7D	3530	IWB3530	BobWhite_c46765_212	55.5	B	A	B	A	A	B	B	B	A	A	B	A	B	A	A	A	A	A	B	A	A	A	A	B	A	A	A	B	B	B	B	A	B	A	A	A	B	A	B	B	A	A	A	B
1684	7D	17551	IWB17551	D_F5XZDLF01D9HYT_373	56.4	B	A	B	A	A	B	B	B	A	A	B	A	B	A	A	A	A	A	B	A	A	A	A	B	A	A	A	B	B	B	B	A	B	A	A	A	B	A	B	B	A	A	A	B
1685	7D	5524	IWB5524	BobWhite_rep_c65034_450	57.2	B	A	B	A	A	B	B	B	A	A	B	A	B	A	A	A	A	A	B	A	A	A	A	B	A	A	A	B	B	B	B	A	B	A	A	A	B	A	B	B	A	A	A	B
1686	7D	62197	IWB62197	RAC875_rep_c113244_113	57.7	B	A	B	A	A	B	B	B	A	A	B	A	B	A	A	A	A	A	B	A	C	A	A	B	A	A	A	B	B	B	B	A	B	A	A	A	B	A	B	B	A	A	A	B
1687	7D	53819	IWB53819	RAC875_c13942_2973	58.6	B	A	B	B	A	B	B	B	A	A	B	A	B	A	A	A	A	A	B	A	B	A	A	B	A	A	A	B	B	B	B	A	B	A	A	A	B	A	B	B	A	A	A	B
1688	7D	49354	IWB49354	Kukri_rep_c108604_858	59.4	B	A	B	B	A	B	B	B	A	A	B	A	B	A	A	A	A	A	B	A	B	A	A	B	A	A	A	B	B	B	B	A	B	A	A	A	B	A	B	B	A	A	A	B
1689	7D	81073	IWA7828	wsnp_Ra_c2930_5550871	59.7	B	A	B	B	A	B	B	B	A	A	B	A	B	A	A	A	A	A	B	A	B	A	A	B	A	A	A	B	B	B	B	A	B	A	A	A	B	A	B	B	A	A	A	B
1690	7D	17768	IWB17768	D_GA8KES401D3GU4_112	60.5	B	A	B	B	A	B	B	B	A	A	B	A	B	A	A	A	A	A	B	A	C	A	A	B	A	A	A	B	B	B	B	A	B	B	A	A	B	A	B	B	A	A	A	B
1691	7D	13142	IWB13142	CAP11_rep_c8279_82	60.8	B	A	B	B	A	B	B	B	A	A	B	A	B	A	A	A	A	A	B	A	C	A	A	B	A	A	A	A	B	B	B	A	B	B	A	A	B	A	B	B	A	A	A	B
1692	7D	60176	IWB60176	RAC875_c68368_99	61.1	B	A	B	B	A	B	B	B	A	A	B	A	B	A	A	A	A	A	B	A	B	A	A	B	A	A	A	A	B	B	B	A	B	B	A	A	B	A	B	B	A	A	A	B
1693	7D	81505	IWA8486	wsnp_RFL_Contig3557_3736656	63.4	B	A	B	A	A	B	B	B	A	A	B	B	B	A	A	A	A	A	B	A	C	A	A	B	A	A	A	A	B	B	B	A	B	B	A	A	B	A	B	B	A	A	A	B
1694	7D	14320	IWB14320	CAP7_c9278_185	70.4	B	B	B	A	A	B	B	B	A	A	A	B	B	A	A	A	A	A	B	A	B	A	A	A	A	A	A	A	B	B	B	A	B	B	A	B	B	A	B	B	A	B	B	B
1695	7D	15471	IWB15471	D_contig08289_112	73.6	B	B	B	A	A	B	B	B	A	A	B	B	B	A	A	A	A	A	B	A	B	A	A	A	A	A	A	A	B	B	B	A	B	B	A	B	B	A	B	B	A	B	B	B
1696	7D	16392	IWB16392	D_contig29036_393	74.4	A	B	B	A	A	B	B	B	A	A	B	B	B	A	A	A	A	A	B	A	B	A	A	A	A	A	A	A	B	B	B	A	B	B	B	B	B	A	B	B	A	A	B	B
1697	7D	17767	IWB17767	D_GA8KES401D0K1W_269	75.8	A	B	B	A	A	B	B	B	A	A	A	B	B	A	A	A	A	A	B	A	B	A	A	A	A	A	A	A	B	B	B	A	B	B	B	B	B	A	B	B	A	A	B	B
1698	7D	17599	IWB17599	D_F5XZDLF02FF9I1_181	76.1	A	B	B	A	A	B	B	B	A	A	A	B	B	A	A	A	A	A	B	A	C	A	A	A	A	A	A	A	B	B	B	A	B	B	B	B	B	A	B	B	A	A	B	B
1699	7D	17823	IWB17823	D_GA8KES402F8B6V_169	77.3	A	B	B	A	A	B	B	B	A	A	A	B	B	A	A	A	A	A	B	A	B	A	A	B	A	A	A	A	B	B	B	A	B	B	B	B	B	A	B	B	A	A	B	B
1700	7D	22212	IWB22212	Excalibur_c13094_523	77.6	A	B	B	A	A	B	B	B	A	A	A	B	B	A	A	A	A	A	B	A	B	A	A	B	A	A	A	A	B	B	B	A	B	B	B	B	B	A	B	B	A	A	B	B
1701	7D	29923	IWB29923	Excalibur_rep_c103227_148	77.8	A	B	B	A	A	B	B	B	A	A	A	B	B	A	A	A	A	A	B	A	B	A	A	B	A	A	A	A	B	B	B	A	B	B	B	B	B	A	B	B	A	A	B	B
1702	7D	16481	IWB16481	D_contig31424_214	78.4	A	B	B	A	A	B	B	B	A	A	A	B	B	A	A	A	A	A	B	A	B	A	A	B	A	A	A	A	B	B	B	A	B	B	B	B	B	A	B	B	A	A	B	B
1703	7D	46722	IWB46722	Kukri_c58234_519	78.9	A	B	B	A	A	B	B	B	A	A	A	B	B	A	A	A	A	A	B	A	B	A	B	B	A	A	A	A	B	B	B	A	B	B	B	B	B	A	B	B	A	A	B	B
1704	7D	22705	IWB22705	Excalibur_c1586_87	82.2	A	B	B	A	A	B	B	B	A	A	A	B	B	A	A	A	A	A	B	B	B	A	B	B	A	A	A	A	B	B	B	A	B	B	A	B	B	A	B	B	A	A	B	B
1705	7D	21364	IWB21364	Ex_c8238_637	83	A	B	B	A	A	B	B	B	A	A	A	B	B	A	A	A	A	A	B	B	B	A	B	B	A	A	A	A	B	B	B	A	B	B	A	B	B	A	B	B	A	A	B	B
1706	7D	18618	IWB18618	D_GBUVHFX01CPG5E_341	83.3	A	B	B	A	A	B	B	B	A	A	A	B	B	A	A	A	A	A	B	B	B	A	B	B	A	A	A	A	B	B	B	A	B	B	A	B	B	A	B	B	A	A	B	B
1707	7D	19183	IWB19183	D_GDRF1KQ01DXO82_144	84.2	A	B	C	A	A	B	B	B	A	A	A	B	B	A	A	A	A	A	B	B	B	A	B	B	A	A	A	B	B	B	B	A	C	B	A	B	B	A	B	B	A	A	C	B
1708	7D	41575	IWB41575	Kukri_c16416_647	85.1	A	B	B	A	A	B	B	B	A	A	A	B	B	A	A	A	A	A	B	B	B	A	B	B	A	A	B	A	B	B	B	A	B	B	A	B	B	A	B	B	A	A	B	B
1709	7D	15546	IWB15546	D_contig09987_661	85.9	A	B	B	A	A	B	B	B	A	A	A	B	B	A	A	A	A	A	B	B	B	A	B	B	A	A	B	A	B	B	B	A	B	B	A	B	B	A	B	B	A	A	B	B
1710	7D	76924	IWA2273	wsnp_Ex_c17914_26681837	86.2	A	B	B	A	A	B	B	B	A	A	A	B	B	A	A	A	A	A	B	B	B	A	B	B	A	A	B	A	B	B	B	A	B	B	A	B	B	A	B	B	A	A	B	B
1711	7D	16157	IWB16157	D_contig23954_311	86.5	A	B	B	A	A	B	B	B	A	A	A	B	B	A	A	A	A	A	B	B	B	A	B	C	A	A	B	A	B	B	B	A	B	B	A	B	B	A	B	B	A	A	B	B
1712	7D	8024	IWB8024	BS00035732_51	87	A	B	B	A	A	B	B	B	A	A	A	B	B	A	A	A	A	A	B	B	B	A	B	B	A	A	B	A	B	B	B	A	B	B	A	B	B	A	B	B	A	A	B	B
1713	7D	16883	IWB16883	D_contig55386_313	87.9	A	B	A	A	A	B	B	B	A	A	A	B	B	A	A	A	A	A	B	B	B	A	B	B	A	A	B	B	B	B	B	A	B	A	A	B	B	A	B	B	A	A	B	B
1714	7D	76634	IWA1902	wsnp_Ex_c145_285194	88.4	A	B	A	A	A	B	B	B	A	B	A	B	B	A	A	A	A	A	B	B	B	A	B	B	A	A	B	B	B	B	B	A	B	A	A	B	B	A	B	B	A	A	B	B
1715	7D	34881	IWB34881	IAAV4510	92.6	A	B	A	A	A	B	B	B	A	A	A	A	B	A	A	A	A	A	B	B	B	A	B	B	A	A	B	B	A	B	B	A	B	A	A	A	B	A	B	B	A	A	B	B
1716	7D	41457	IWB41457	Kukri_c15768_1383	93.2	A	B	A	A	A	B	B	B	A	A	A	A	B	A	A	A	A	A	B	B	B	A	B	B	A	A	B	B	A	B	B	A	B	A	A	A	B	A	B	B	A	A	B	B
1717	7D	61610	IWB61610	RAC875_rep_c106588_205	93.7	A	B	A	A	A	B	B	B	A	A	A	A	B	A	A	A	A	A	B	B	B	A	B	B	A	A	A	B	A	B	B	A	B	A	A	A	B	A	B	B	A	A	B	B
1718	7D	8877	IWB8877	BS00062644_51	94	A	B	A	A	A	B	B	B	A	A	A	A	B	A	A	A	A	A	B	B	B	A	B	B	A	A	A	B	A	B	B	B	B	A	A	A	B	A	B	B	A	A	B	B
1719	7D	7276	IWB7276	BS00022825_51	94.3	A	B	A	A	A	B	B	B	A	A	A	A	B	A	A	A	A	A	B	B	B	A	B	B	A	A	A	B	A	B	B	C	B	A	A	A	B	A	B	B	A	A	B	B
1720	7D	43427	IWB43427	Kukri_c27397_754	96.5	A	B	A	A	A	B	B	B	A	A	A	A	B	A	A	A	A	A	B	B	B	A	B	B	A	A	A	B	A	B	B	B	B	A	A	B	B	A	A	B	A	A	B	B
1721	7D	63887	IWB63887	RFL_Contig2257_810	97.6	A	B	A	A	A	B	B	C	A	B	A	A	B	A	A	A	A	A	B	B	B	A	B	B	A	A	A	B	B	B	B	B	B	A	A	B	B	A	A	B	A	A	B	B
1722	7D	17747	IWB17747	D_GA8KES401CIKOJ_160	99.1	A	B	A	A	A	B	B	B	A	B	A	A	B	C	A	C	B	A	B	B	B	A	B	C	A	A	A	B	B	B	B	B	B	A	A	B	B	B	A	B	A	A	B	B
1723	7D	74708	IWB74708	tplb0041e14_1096	100.9	A	B	A	A	A	B	B	B	A	B	A	A	B	A	A	A	B	A	B	B	B	A	B	B	A	A	A	B	B	B	B	B	B	A	A	B	B	B	A	B	A	A	B	B
1724	7D	18531	IWB18531	D_GBQ4KXB01EJHOJ_221	106	A	B	A	B	A	A	B	B	A	B	A	A	B	A	B	A	B	A	B	B	B	A	A	B	A	A	A	B	B	B	B	B	B	A	C	B	B	B	A	B	A	A	B	B
1725	7D	19360	IWB19360	D_GDS7LZN02F6AEK_164	108.3	B	B	A	B	A	A	B	B	A	B	A	A	B	A	B	A	B	A	B	B	B	A	A	B	A	A	A	B	A	B	B	B	B	A	C	B	B	B	A	B	A	A	B	B
1726	7D	18876	IWB18876	D_GCE8AKX02H05OL_77	109.1	B	B	A	B	A	A	B	B	A	B	A	A	B	A	B	A	B	A	B	A	B	A	A	B	A	A	A	B	A	B	B	B	B	A	B	B	B	B	A	B	A	A	B	B
1727	7D	25012	IWB25012	Excalibur_c30730_276	122.3	B	A	A	B	A	A	B	B	A	B	B	B	A	B	B	A	A	A	B	B	B	A	A	B	A	A	A	B	A	A	B	A	B	A	C	B	B	B	A	B	A	A	B	B
1728	7D	45562	IWB45562	Kukri_c45749_158	122.5	B	A	A	B	A	A	B	B	A	B	B	B	A	B	B	B	A	A	B	B	B	A	A	B	A	A	A	B	A	A	B	A	B	A	C	B	B	B	A	B	A	A	B	B
1729	7D	17509	IWB17509	D_F5XZDLF01B8DH4_88	124.5	B	A	A	B	A	A	B	B	A	B	B	B	A	B	B	B	A	A	B	B	B	A	A	B	A	A	B	B	A	A	B	A	B	A	C	B	B	B	B	B	A	A	B	B
1730	7D	33882	IWB33882	GENE-4272_165	127.1	B	A	A	B	A	A	B	B	A	B	A	B	A	B	B	B	A	A	B	B	B	B	A	B	A	A	B	C	C	A	B	A	B	C	B	B	B	B	B	B	A	B	B	C
1731	7D	28036	IWB28036	Excalibur_c61318_467	128.6	B	A	A	B	A	A	B	B	A	B	A	B	A	B	B	B	A	A	B	B	B	B	A	B	A	A	B	B	A	A	B	A	B	A	B	B	B	B	B	B	A	B	B	B
1732	7D	48455	IWB48455	Kukri_c9683_804	129.1	B	A	A	B	A	A	B	B	A	B	A	B	A	B	B	B	A	A	B	B	B	B	A	B	A	A	B	B	A	A	B	A	B	A	A	B	B	B	B	B	A	B	B	B
1733	7D	50603	IWB50603	Kukri_s106214_192	130.2	B	A	A	B	A	A	B	B	A	B	A	B	A	B	B	B	A	A	B	B	B	B	A	B	A	A	B	B	A	A	B	A	B	A	A	B	A	B	B	B	A	B	B	B
1734	7D	20242	IWB20242	Ex_c24486_509	136.2	B	A	A	B	A	A	B	B	A	B	A	B	A	B	B	B	A	A	B	B	B	A	A	B	A	A	B	B	A	A	B	A	A	A	A	B	A	B	B	B	A	B	B	B
1735	7D	15613	IWB15613	D_contig11313_286	137.6	B	A	A	B	A	A	B	A	A	B	A	B	A	B	B	B	A	A	B	B	B	A	B	B	A	A	B	B	A	C	B	A	A	A	A	B	A	B	B	A	A	B	B	B
1736	7D	49080	IWB49080	Kukri_rep_c105287_311	145.3	B	A	A	B	A	B	B	A	A	B	A	B	A	B	C	B	A	B	B	B	A	B	B	B	A	B	A	B	A	A	B	A	A	B	A	B	A	B	B	A	A	A	B	B
1737	7D	11947	IWB11947	BS00096024_51	145.9	B	A	A	B	B	B	C	A	A	B	A	B	A	B	C	B	A	B	B	B	A	B	B	B	A	B	A	B	A	A	B	A	A	B	A	B	A	B	B	A	A	A	B	B
1738	7D	18349	IWB18349	D_GBF1XID01AXA2S_404	146.4	B	A	A	B	B	B	C	A	A	B	A	B	A	B	C	B	A	B	B	B	A	B	B	B	A	B	A	B	A	A	B	A	A	B	A	B	A	B	B	A	A	A	B	B
1739	7D	18541	IWB18541	D_GBQ4KXB02FR7XF_153	146.9	B	A	A	B	B	B	C	A	A	B	A	B	A	B	B	A	A	B	B	B	A	B	B	B	A	B	A	C	A	A	B	A	A	B	A	B	A	B	B	A	A	A	B	B
A = Allele from ND495, B = Allele from Largo, C = Missing data
[truncated: 144 more columns]
